# Supplementary material for: Intergenic accumulation of RNA polymerase II maintains the potential for swift transcriptional restart upon release from quiescence
Source: HighWire-hosted journal article supplement (doi:10.1101/gr.279874.124), 2025-08-12
Supplement: Supplemental_Table_S1.xlsx [file Supplemental_Table_S1.xlsx]

## Sheet: strains table
Strains Table
Strain	Species	Background	Mating type	Genotype	reference
YAM2492	Schizosaccharomyces pombe		h-	rpb3::RPB3-6HIS-3FLAG(NAT)	Wery et al., 2018
yAT1684	Saccharomyces cerevisiae	W303	a	hmlD::HPH RAD5+ rap1::RAP1-GFP(LEU2) RDN1::ADE2	this study
yAT3239	Saccharomyces cerevisiae	W303	a	hmlD::HPH RAD5+ rap1::RAP1-GFP(LEU2) RDN1::ADE2 rpb3::RPB3-6HIS-3FLAG(NAT)	this study
yAT3555	Saccharomyces cerevisiae	W303	a	hmlD::HPH RAD5+ rap1::RAP1-GFP(LEU2) RDN1::ADE2 rpb3::RPB3-6HIS-3FLAG(NAT) sir3Δ::KanMX hmlΔ::HPH	this study
yAT3716	Saccharomyces cerevisiae	W303	a	hml∆::HPH RAD5+ rap1::RAP1-GFP(LEU2) RDN1::ADE2 rpa135::RPA135-6HIS-3FLAG(NAT)	this study
yAT3900	Saccharomyces cerevisiae	W303	a	ade2-1::ADE2 rap1::RAP1-GFP(LEU2) hxt1::HXT1-mCherry(KanMX)	this study
yAT4796	Saccharomyces cerevisiae	W303	a	rpb1::rpb1-1 rap1::GFP-RAP1(ADE2)	this study; Nonet et al., 1987
yAT4802	Saccharomyces cerevisiae	W303	a	ade2-1::ADE2 hml∆::HPH rap1::RAP1-GFP(LEU2) hxt1::HXT1-mCherry(KanMX) gre1∆::cloNAT	this study
yAT4803	Saccharomyces cerevisiae	W303	a	ade2-1::ADE2 hml∆::HPH rap1::RAP1-GFP(LEU2) hxt1::HXT1-mCherry(KanMX) sip18∆::cloNAT	this study
yAT4804	Saccharomyces cerevisiae	W303	a	ade2-1::ADE2 hml∆::HPH rap1::RAP1-GFP(LEU2) hxt1::HXT1-mCherry(KanMX) tma10∆::cloNAT	this study
yAT4805	Saccharomyces cerevisiae	W303	a	ade2-1::ADE2 hml∆::HPH rap1::RAP1-GFP(LEU2) hxt1::HXT1-mCherry(KanMX) dpc7∆::cloNAT	this study
yAT4806	Saccharomyces cerevisiae	W303	a	ade2-1::ADE2 hml∆::HPH rap1::RAP1-GFP(LEU2) hxt1::HXT1-mCherry(KanMX) yer084w∆::cloNAT	this study
yAT4807	Saccharomyces cerevisiae	W303	a	ade2-1::ADE2 hml∆::HPH rap1::RAP1-GFP(LEU2) hxt1::HXT1-mCherry(KanMX) spg1∆::cloNAT	this study
yAT4808	Saccharomyces cerevisiae	W303	a	ade2-1::ADE2 hml∆::HPH rap1::RAP1-GFP(LEU2) hxt1::HXT1-mCherry(KanMX) ddr2∆::cloNAT	this study
