# Supplementary material for: Intergenic accumulation of RNA polymerase II maintains the potential for swift transcriptional restart upon release from quiescence
Source: HighWire-hosted journal article supplement (doi:10.1101/gr.279874.124), 2025-08-12
Supplement: Supplemental_Table_S2.xlsx [file Supplemental_Table_S2.xlsx]

## Sheet: primers_table
Primers Table
chr	amplicon start	amplicon stop	target region	amplicon type	primer pair ID	sequences (forward-reverse)	primers_ID_in_oAT_database	original publication
chrXIV	405879	405944	DCP2/MLS1	intergenic	1111	ATTTATCCGAACCTCGGCCC-TCGACGGATAGAAGCGGTTG	oAT2887_-381fDCP2-oAT2886_-316rDCP2	this study
chrXIV	406I0	406079	DCP2/MLS1	intergenic	1126	TCGTCGTAAGGCTGACACTG-TCAATCACAGTTTCATACCGGC	oAT3XII3_-5XVfDCP2-oAT3XII2_-446rDCP2	this study
chrXIV	404253	404310	DCP2	genebody	1021	TCTCAACCGTTTTCCTTGCC-AGCTGCTGTAACCAGAGTCC	oAT2839_+XII55fDCP2-oAT2838_+XII93rDCP2	this study
chrIII	133332	133428	ADY2	intergenic	160XV	GGTAACAAACGTTGGGGAAG-CAGGTTGGAGTACAGAGGAG	oAT2853_-305fADY2-oAT2852_-228rADY	this study
chrIII	132751	132834	ADY2	genebody	160219	CTTCGCGTTGACGACATTTG-GCACAACCGACGACAACATTAG	oAT3085_+309fADY2-oAT3084_+373rADY2	this study
chrIII	133024	133113	ADY2	genebody	16024	GGAACAAACGAGCGGAAAC-TCTTCTGCAACGCCATTAAC	oAT2851_+XIIfADY2-oAT2850_+82rADY2	this study
chrXV	444690	444759	RPL3	genebody	C021	TGCTACCAGCTTCGACAGAAC-TCACCGTAGTGGACGAAACC	oAT2548_+882fRPL3-oAT2549_+947rRPL3	this study
chrXV	445567	445633	RPL3	genebody	C022	CTCACAGAAAGTACGAAGCACCAC-CTCACAGAAAGTACGAAGCACCAC	oAT2546_+5fRPL3-oAT2547_+73rRPL3	this study
chrI	178346	178392	N411_control	intergenic	N411	TCGGACAACCTGAACCAACG-AAGGTAGTGGTGGCTTCGAC	oAT2874_N411_f-oAT2875_N411_r	this study
chrXII	45XIV20	460671	RDA1	rDNA	RDA1	CAAAGATGGGTTGAAAGAGAAGG-CATGTTTGCCGCTCTGATG	oAT2234-oAT2235	Krawczyk et al., 20XIV; 10.1093/nar/gkuXIV8
chrXII	455191	464458	RDA47	rDNA	RD47	GAGGTTTCTCTGCGTGCTTG-ATTGTTCGCCTAGACGCTCTC	oAT2256-oAT2257	Krawczyk et al., 20XIV; 10.1093/nar/gkuXIV8
