# Supplementary material for: Intergenic accumulation of RNA polymerase II maintains the potential for swift transcriptional restart upon release from quiescence
Source: HighWire-hosted journal article supplement (doi:10.1101/gr.279874.124), 2025-08-12
Supplement: Supplemental_Table_S3.xlsx [file Supplemental_Table_S3.xlsx]

## Sheet: README
IG_name	intergene code name
IG_chr	intergene chromosome
IG_start	intergene start
IG_end	intergene end
chrgene	gene chromosome
startgene	gene start
stopgene	gene stop
strand	gene strand
type	intergene type (tandemC, - strand; tandemW, + strand, divergent)
IG_number	intergene number
source	annotation source
gtfType	type of annotation in gtf file
gene_info	gene info
cat	same as strand, numeric
intergeneSize	intergene size (bp)
type2	intergene type (divergent, tandem)
corrected	gene start corrected based on TSS file (logical)
count_IG_as_promoter	whether the intergene is to be counted as containing at least one promoter
gene_id	gene id or systematic name
gene_name	gene standard name
Q_peak_overlap_type	whether the MACS2-called peak has a signal value >2.4 (strong) or not (mild)
Q_any_peak_overlap_type	whether the intergene is overlapped or not by a MACS2-called peak

## Sheet: promoter_bearing_intergenes
IG_name	IG_chr	IG_start	IG_end	chrgene	startgene	stopgene	strand	type	IG_number	source	gtfType	gene_info	cat	intergeneSize	type2	corrected	count_IG_as_promoter	gene_id	gene_name	Q_peak_overlap_type	Q_any_peak_overlap_type
IG_1000_genes-complement	chr04	625998	626707	chr04	624900	626076	-	tandemC	1000	sgd	gene	gene_id YDR090C; gene_source sgd; gene_biotype protein_coding;	-1	710	tandem	TRUE	TRUE	YDR090C		mild_peak	any_peak_overlap
IG_1001_genes-complement	chr04	628534	629875	chr04	626547	628590	-	divergent	1001	sgd	gene	gene_id YDR091C; gene_name RLI1; gene_source sgd; gene_biotype protein_coding;	-1	1342	divergent	TRUE	TRUE	YDR091C	RLI1	mild_peak	any_peak_overlap
IG_1001_genes-complement	chr04	628534	629875	chr04	629826	630697	+	divergent	1001	sgd	gene	gene_id YDR092W; gene_name UBC13; gene_source sgd; gene_biotype protein_coding;	1	1342	divergent	TRUE	TRUE	YDR092W	UBC13	mild_peak	any_peak_overlap
IG_1002_genes-complement	chr04	630605	631281	chr04	631189	636192	+	tandemW	1002	sgd	gene	gene_id YDR093W; gene_name DNF2; gene_source sgd; gene_biotype protein_coding;	1	677	tandem	TRUE	TRUE	YDR093W	DNF2	mild_peak	any_peak_overlap
IG_1003_genes-complement	chr04	636527	637138	chr04	637122	639992	+	divergent	1003	sgd	gene	gene_id YDR096W; gene_name GIS1; gene_source sgd; gene_biotype protein_coding;	1	612	divergent	TRUE	TRUE	YDR096W	GIS1	strong_peak	any_peak_overlap
IG_1003_genes-complement	chr04	636527	637138	chr04	636018	636625	-	divergent	1003	sgd	gene	gene_id YDR095C; gene_source sgd; gene_biotype protein_coding;	-1	612	divergent	TRUE	TRUE	YDR095C		strong_peak	any_peak_overlap
IG_1005_genes-complement	chr04	643837	644177	chr04	640037	643906	-	tandemC	1005	sgd	gene	gene_id YDR097C; gene_name MSH6; gene_source sgd; gene_biotype protein_coding;	-1	341	tandem	TRUE	TRUE	YDR097C	MSH6	mild_peak	any_peak_overlap
IG_1006_genes-complement	chr04	644930	653606	chr04	652706	654649	+	divergent	1006	sgd	gene	gene_id YDR099W; gene_name BMH2; gene_source sgd; gene_biotype protein_coding;	1	8677	divergent	TRUE	TRUE	YDR099W	BMH2	mild_peak	any_peak_overlap
IG_1006_genes-complement	chr04	644930	653606	chr04	644104	645100	-	divergent	1006	sgd	gene	gene_id YDR098C; gene_name GRX3; gene_source sgd; gene_biotype protein_coding;	-1	8677	divergent	TRUE	TRUE	YDR098C	GRX3	mild_peak	any_peak_overlap
IG_1007_genes-complement	chr04	654428	655012	chr04	654978	655629	+	tandemW	1007	sgd	gene	gene_id YDR100W; gene_name TVP15; gene_source sgd; gene_biotype protein_coding;	1	585	tandem	TRUE	TRUE	YDR100W	TVP15	mild_peak	any_peak_overlap
IG_1009_genes-complement	chr04	657467	657647	chr04	655577	657501	-	tandemC	1009	sgd	gene	gene_id YDR101C; gene_name ARX1; gene_source sgd; gene_biotype protein_coding;	-1	181	tandem	TRUE	TRUE	YDR101C	ARX1	mild_peak	any_peak_overlap
IG_1010_genes-complement	chr04	657980	658349	chr04	657648	657980	-	divergent	1010	sgd	gene	gene_id YDR102C; gene_source sgd; gene_biotype protein_coding;	-1	370	divergent	FALSE	TRUE	YDR102C		no_peak_overlap	no_peak_overlap
IG_1010_genes-complement	chr04	657980	658349	chr04	658301	661168	+	divergent	1010	sgd	gene	gene_id YDR103W; gene_name STE5; gene_source sgd; gene_biotype protein_coding;	1	370	divergent	TRUE	TRUE	YDR103W	STE5	no_peak_overlap	no_peak_overlap
IG_1012_genes-complement	chr04	664910	665348	chr04	661043	664960	-	tandemC	1012	sgd	gene	gene_id YDR104C; gene_name SPO71; gene_source sgd; gene_biotype protein_coding;	-1	439	tandem	TRUE	TRUE	YDR104C	SPO71	no_peak_overlap	no_peak_overlap
IG_1013_genes-complement	chr04	666770	667003	chr04	665264	666823	-	divergent	1013	sgd	gene	gene_id YDR105C; gene_name TMS1; gene_source sgd; gene_biotype protein_coding;	-1	234	divergent	TRUE	TRUE	YDR105C	TMS1	no_peak_overlap	no_peak_overlap
IG_1013_genes-complement	chr04	666770	667003	chr04	666975	667900	+	divergent	1013	sgd	gene	gene_id YDR106W; gene_name ARP10; gene_source sgd; gene_biotype protein_coding;	1	234	divergent	TRUE	TRUE	YDR106W	ARP10	no_peak_overlap	no_peak_overlap
IG_1015_genes-complement	chr04	671034	671268	chr04	668889	671054	-	divergent	1015	sgd	gene	gene_id YDR107C; gene_name TMN2; gene_source sgd; gene_biotype protein_coding;	-1	235	divergent	TRUE	TRUE	YDR107C	TMN2	no_peak_overlap	no_peak_overlap
IG_1015_genes-complement	chr04	671034	671268	chr04	671226	673462	+	divergent	1015	sgd	gene	gene_id YDR108W; gene_name TRS85; gene_source sgd; gene_biotype protein_coding;	1	235	divergent	TRUE	TRUE	YDR108W	TRS85	no_peak_overlap	no_peak_overlap
IG_1017_genes-complement	chr04	675667	676101	chr04	673371	675713	-	divergent	1017	sgd	gene	gene_id YDR109C; gene_source sgd; gene_biotype protein_coding;	-1	435	divergent	TRUE	TRUE	YDR109C		no_peak_overlap	no_peak_overlap
IG_1017_genes-complement	chr04	675667	676101	chr04	676051	677997	+	divergent	1017	sgd	gene	gene_id YDR110W; gene_name FOB1; gene_source sgd; gene_biotype protein_coding;	1	435	divergent	TRUE	TRUE	YDR110W	FOB1	no_peak_overlap	no_peak_overlap
IG_102_genes-complement	chr02	2899	2906	chr02	2582	2899	-	tandemC	102	sgd	gene	gene_id YBL112C; gene_source sgd; gene_biotype protein_coding;	-1	8	tandem	FALSE	TRUE	YBL112C		no_peak_overlap	no_peak_overlap
IG_1020_genes-complement	chr04	681617	681923	chr04	680419	681707	-	tandemC	1020	sgd	gene	gene_id YDR113C; gene_name PDS1; gene_source sgd; gene_biotype protein_coding;	-1	307	tandem	TRUE	TRUE	YDR113C	PDS1	mild_peak	any_peak_overlap
IG_1022_genes-complement	chr04	683581	683945	chr04	682591	683607	-	tandemC	1022	sgd	gene	gene_id YDR116C; gene_name MRPL1; gene_source sgd; gene_biotype protein_coding;	-1	365	tandem	TRUE	TRUE	YDR116C	MRPL1	no_peak_overlap	no_peak_overlap
IG_1023_genes-complement	chr04	685643	685881	chr04	683864	685672	-	divergent	1023	sgd	gene	gene_id YDR117C; gene_name TMA64; gene_source sgd; gene_biotype protein_coding;	-1	239	divergent	TRUE	TRUE	YDR117C	TMA64	no_peak_overlap	no_peak_overlap
IG_1023_genes-complement	chr04	685643	685881	chr04	685838	687945	+	divergent	1023	sgd	gene	gene_id YDR118W; gene_name APC4; gene_source sgd; gene_biotype protein_coding;	1	239	divergent	TRUE	TRUE	YDR118W	APC4	no_peak_overlap	no_peak_overlap
IG_1024_genes-complement	chr04	687884	688226	chr04	688139	690587	+	tandemW	1024	sgd	gene	gene_id YDR119W; gene_name VBA4; gene_source sgd; gene_biotype protein_coding;	1	343	tandem	TRUE	TRUE	YDR119W	VBA4	no_peak_overlap	no_peak_overlap
IG_1025_genes-complement	chr04	690533	691013	chr04	690968	691452	+	tandemW	1025	sgd	gene	gene_id YDR119W-A; gene_name COX26; gene_source sgd; gene_biotype protein_coding;	1	481	tandem	TRUE	TRUE	YDR119W-A	COX26	strong_peak	any_peak_overlap
IG_1027_genes-complement	chr04	693261	693584	chr04	691339	693288	-	divergent	1027	sgd	gene	gene_id YDR120C; gene_name TRM1; gene_source sgd; gene_biotype protein_coding;	-1	324	divergent	TRUE	TRUE	YDR120C	TRM1	mild_peak	any_peak_overlap
IG_1027_genes-complement	chr04	693261	693584	chr04	693466	694280	+	divergent	1027	sgd	gene	gene_id YDR121W; gene_name DPB4; gene_source sgd; gene_biotype protein_coding;	1	324	divergent	TRUE	TRUE	YDR121W	DPB4	mild_peak	any_peak_overlap
IG_1028_genes-complement	chr04	694175	694699	chr04	694627	698048	+	tandemW	1028	sgd	gene	gene_id YDR122W; gene_name KIN1; gene_source sgd; gene_biotype protein_coding;	1	525	tandem	TRUE	TRUE	YDR122W	KIN1	strong_peak	any_peak_overlap
IG_103_genes-complement	chr02	5009	5789	chr02	2907	5009	-	divergent	103	sgd	gene	gene_id YBL111C; gene_source sgd; gene_biotype protein_coding;	-1	781	divergent	FALSE	TRUE	YBL111C		strong_peak	any_peak_overlap
IG_103_genes-complement	chr02	5009	5789	chr02	5693	6240	+	divergent	103	sgd	gene	gene_id YBL109W; gene_source sgd; gene_biotype protein_coding;	1	781	divergent	TRUE	TRUE	YBL109W		strong_peak	any_peak_overlap
IG_1030_genes-complement	chr04	699468	700314	chr04	698421	699499	-	divergent	1030	sgd	gene	gene_id YDR123C; gene_name INO2; gene_source sgd; gene_biotype protein_coding;	-1	847	divergent	TRUE	TRUE	YDR123C	INO2	mild_peak	any_peak_overlap
IG_1030_genes-complement	chr04	699468	700314	chr04	700315	701289	+	divergent	1030	sgd	gene	gene_id YDR124W; gene_source sgd; gene_biotype protein_coding;	1	847	divergent	FALSE	TRUE	YDR124W		mild_peak	any_peak_overlap
IG_1032_genes-complement	chr04	702758	703233	chr04	701258	702803	-	divergent	1032	sgd	gene	gene_id YDR125C; gene_name ECM18; gene_source sgd; gene_biotype protein_coding;	-1	476	divergent	TRUE	TRUE	YDR125C	ECM18	no_peak_overlap	no_peak_overlap
IG_1032_genes-complement	chr04	702758	703233	chr04	703202	704442	+	divergent	1032	sgd	gene	gene_id YDR126W; gene_name SWF1; gene_source sgd; gene_biotype protein_coding;	1	476	divergent	TRUE	TRUE	YDR126W	SWF1	no_peak_overlap	no_peak_overlap
IG_1033_genes-complement	chr04	704244	704483	chr04	704404	709345	+	tandemW	1033	sgd	gene	gene_id YDR127W; gene_name ARO1; gene_source sgd; gene_biotype protein_coding;	1	240	tandem	TRUE	TRUE	YDR127W	ARO1	no_peak_overlap	no_peak_overlap
IG_1034_genes-complement	chr04	709250	709548	chr04	709490	713143	+	tandemW	1034	sgd	gene	gene_id YDR128W; gene_name MTC5; gene_source sgd; gene_biotype protein_coding;	1	299	tandem	TRUE	TRUE	YDR128W	MTC5	no_peak_overlap	no_peak_overlap
IG_1036_genes-complement	chr04	715379	715746	chr04	713193	715434	-	tandemC	1036	sgd	gene	gene_id YDR129C; gene_name SAC6; gene_source sgd; gene_biotype protein_coding;	-1	368	tandem	TRUE	TRUE	YDR129C	SAC6	no_peak_overlap	no_peak_overlap
IG_1037_genes-complement	chr04	716622	716789	chr04	715631	716644	-	tandemC	1037	sgd	gene	gene_id YDR130C; gene_name FIN1; gene_source sgd; gene_biotype protein_coding;	-1	168	tandem	TRUE	TRUE	YDR130C	FIN1	no_peak_overlap	no_peak_overlap
IG_1038_genes-complement	chr04	718460	718815	chr04	716706	718517	-	tandemC	1038	sgd	gene	gene_id YDR131C; gene_source sgd; gene_biotype protein_coding;	-1	356	tandem	TRUE	TRUE	YDR131C		no_peak_overlap	no_peak_overlap
IG_1039_genes-complement	chr04	720303	720961	chr04	718687	720420	-	tandemC	1039	sgd	gene	gene_id YDR132C; gene_source sgd; gene_biotype protein_coding;	-1	659	tandem	TRUE	TRUE	YDR132C		mild_peak	any_peak_overlap
IG_1040_genes-complement	chr04	721297	723003	chr04	720788	721369	-	tandemC	1040	sgd	gene	gene_id YDR133C; gene_source sgd; gene_biotype protein_coding;	-1	1707	tandem	TRUE	TRUE	YDR133C		strong_peak	any_peak_overlap
IG_1041_genes-complement	chr04	727551	727710	chr04	722905	727586	-	tandemC	1041	sgd	gene	gene_id YDR135C; gene_name YCF1; gene_source sgd; gene_biotype protein_coding;	-1	160	tandem	TRUE	TRUE	YDR135C	YCF1	no_peak_overlap	no_peak_overlap
IG_1042_genes-complement	chr04	730250	730577	chr04	730557	732886	+	tandemW	1042	sgd	gene	gene_id YDR138W; gene_name HPR1; gene_source sgd; gene_biotype protein_coding;	1	328	tandem	TRUE	TRUE	YDR138W	HPR1	no_peak_overlap	no_peak_overlap
IG_1044_genes-complement	chr04	733924	734137	chr04	733430	733949	-	divergent	1044	sgd	gene	gene_id YDR139C; gene_name RUB1; gene_source sgd; gene_biotype protein_coding;	-1	214	divergent	TRUE	TRUE	YDR139C	RUB1	no_peak_overlap	no_peak_overlap
IG_1044_genes-complement	chr04	733924	734137	chr04	734121	734913	+	divergent	1044	sgd	gene	gene_id YDR140W; gene_name MTQ2; gene_source sgd; gene_biotype protein_coding;	1	214	divergent	TRUE	TRUE	YDR140W	MTQ2	no_peak_overlap	no_peak_overlap
IG_1046_genes-complement	chr04	739997	740472	chr04	734773	740043	-	tandemC	1046	sgd	gene	gene_id YDR141C; gene_name DOP1; gene_source sgd; gene_biotype protein_coding;	-1	476	tandem	TRUE	TRUE	YDR141C	DOP1	no_peak_overlap	no_peak_overlap
IG_1047_genes-complement	chr04	741600	742041	chr04	740372	741739	-	tandemC	1047	sgd	gene	gene_id YDR142C; gene_name PEX7; gene_source sgd; gene_biotype protein_coding;	-1	442	tandem	TRUE	TRUE	YDR142C	PEX7	no_peak_overlap	no_peak_overlap
IG_1048_genes-complement	chr04	743874	744310	chr04	741861	744005	-	tandemC	1048	sgd	gene	gene_id YDR143C; gene_name SAN1; gene_source sgd; gene_biotype protein_coding;	-1	437	tandem	TRUE	TRUE	YDR143C	SAN1	mild_peak	any_peak_overlap
IG_1049_genes-complement	chr04	746101	746737	chr04	744194	746235	-	divergent	1049	sgd	gene	gene_id YDR144C; gene_name MKC7; gene_source sgd; gene_biotype protein_coding;	-1	637	divergent	TRUE	TRUE	YDR144C	MKC7	no_peak_overlap	no_peak_overlap
IG_1049_genes-complement	chr04	746101	746737	chr04	746668	748483	+	divergent	1049	sgd	gene	gene_id YDR145W; gene_name TAF12; gene_source sgd; gene_biotype protein_coding;	1	637	divergent	TRUE	TRUE	YDR145W	TAF12	no_peak_overlap	no_peak_overlap
IG_105_genes-complement	chr02	7733	8176	chr02	7605	7733	-	divergent	105	sgd	gene	gene_id YBL108C-A; gene_name PAU9; gene_source sgd; gene_biotype protein_coding;	-1	444	divergent	FALSE	TRUE	YBL108C-A	PAU9	no_peak_overlap	no_peak_overlap
IG_105_genes-complement	chr02	7733	8176	chr02	8177	8482	+	divergent	105	sgd	gene	gene_id YBL108W; gene_source sgd; gene_biotype protein_coding;	1	444	divergent	FALSE	TRUE	YBL108W		no_peak_overlap	no_peak_overlap
IG_1051_genes-complement	chr04	750742	751630	chr04	748479	750853	-	divergent	1051	sgd	gene	gene_id YDR146C; gene_name SWI5; gene_source sgd; gene_biotype protein_coding;	-1	889	divergent	TRUE	TRUE	YDR146C	SWI5	mild_peak	any_peak_overlap
IG_1051_genes-complement	chr04	750742	751630	chr04	751569	753284	+	divergent	1051	sgd	gene	gene_id YDR147W; gene_name EKI1; gene_source sgd; gene_biotype protein_coding;	1	889	divergent	TRUE	TRUE	YDR147W	EKI1	mild_peak	any_peak_overlap
IG_1053_genes-complement	chr04	755066	755554	chr04	753529	755133	-	tandemC	1053	sgd	gene	gene_id YDR148C; gene_name KGD2; gene_source sgd; gene_biotype protein_coding;	-1	489	tandem	TRUE	TRUE	YDR148C	KGD2	strong_peak	any_peak_overlap
IG_1055_genes-complement	chr04	765155	765705	chr04	765672	766569	+	divergent	1055	sgd	gene	gene_id YDR152W; gene_name GIR2; gene_source sgd; gene_biotype protein_coding;	1	551	divergent	TRUE	TRUE	YDR152W	GIR2	strong_peak	any_peak_overlap
IG_1055_genes-complement	chr04	765155	765705	chr04	763995	765246	-	divergent	1055	sgd	gene	gene_id YDR151C; gene_name CTH1; gene_source sgd; gene_biotype protein_coding;	-1	551	divergent	TRUE	TRUE	YDR151C	CTH1	strong_peak	any_peak_overlap
IG_1057_genes-complement	chr04	767971	768402	chr04	766611	768086	-	tandemC	1057	sgd	gene	gene_id YDR153C; gene_name ENT5; gene_source sgd; gene_biotype protein_coding;	-1	432	tandem	TRUE	TRUE	YDR153C	ENT5	mild_peak	any_peak_overlap
IG_1058_genes-complement	chr04	769000	769524	chr04	768396	769042	-	divergent	1058	sgd	gene	gene_id YDR155C; gene_name CPR1; gene_source sgd; gene_biotype protein_coding;	-1	525	divergent	TRUE	TRUE	YDR155C	CPR1	no_peak_overlap	no_peak_overlap
IG_1058_genes-complement	chr04	769000	769524	chr04	769482	770035	+	divergent	1058	sgd	gene	gene_id YDR156W; gene_name RPA14; gene_source sgd; gene_biotype protein_coding;	1	525	divergent	TRUE	TRUE	YDR156W	RPA14	no_peak_overlap	no_peak_overlap
IG_1059_genes-complement	chr04	770332	770356	chr04	770323	771579	+	tandemW	1059	sgd	gene	gene_id YDR158W; gene_name HOM2; gene_source sgd; gene_biotype protein_coding;	1	25	tandem	TRUE	TRUE	YDR158W	HOM2	no_peak_overlap	no_peak_overlap
IG_106_genes-complement	chr02	8482	9267	chr02	9268	9372	+	tandemW	106	sgd	gene	gene_id YBL107W-A; gene_source sgd; gene_biotype protein_coding;	1	786	tandem	FALSE	TRUE	YBL107W-A		mild_peak	any_peak_overlap
IG_1060_genes-complement	chr04	771454	771876	chr04	771780	775831	+	tandemW	1060	sgd	gene	gene_id YDR159W; gene_name SAC3; gene_source sgd; gene_biotype protein_coding;	1	423	tandem	TRUE	TRUE	YDR159W	SAC3	no_peak_overlap	no_peak_overlap
IG_1061_genes-complement	chr04	775782	776162	chr04	776052	778795	+	tandemW	1061	sgd	gene	gene_id YDR160W; gene_name SSY1; gene_source sgd; gene_biotype protein_coding;	1	381	tandem	TRUE	TRUE	YDR160W	SSY1	no_peak_overlap	no_peak_overlap
IG_1062_genes-complement	chr04	778721	779042	chr04	779010	780306	+	tandemW	1062	sgd	gene	gene_id YDR161W; gene_name ACL4; gene_source sgd; gene_biotype protein_coding;	1	322	tandem	TRUE	TRUE	YDR161W	ACL4	no_peak_overlap	no_peak_overlap
IG_1064_genes-complement	chr04	781100	781422	chr04	780192	781206	-	divergent	1064	sgd	gene	gene_id YDR162C; gene_name NBP2; gene_source sgd; gene_biotype protein_coding;	-1	323	divergent	TRUE	TRUE	YDR162C	NBP2	no_peak_overlap	no_peak_overlap
IG_1064_genes-complement	chr04	781100	781422	chr04	781365	782031	+	divergent	1064	sgd	gene	gene_id YDR163W; gene_name CWC15; gene_source sgd; gene_biotype protein_coding;	1	323	divergent	TRUE	TRUE	YDR163W	CWC15	no_peak_overlap	no_peak_overlap
IG_1066_genes-complement	chr04	784215	784870	chr04	781905	784258	-	divergent	1066	sgd	gene	gene_id YDR164C; gene_name SEC1; gene_source sgd; gene_biotype protein_coding;	-1	656	divergent	TRUE	TRUE	YDR164C	SEC1	no_peak_overlap	no_peak_overlap
IG_1066_genes-complement	chr04	784215	784870	chr04	784839	786284	+	divergent	1066	sgd	gene	gene_id YDR165W; gene_name TRM82; gene_source sgd; gene_biotype protein_coding;	1	656	divergent	TRUE	TRUE	YDR165W	TRM82	no_peak_overlap	no_peak_overlap
IG_1068_genes-complement	chr04	789221	789448	chr04	786190	789276	-	divergent	1068	sgd	gene	gene_id YDR166C; gene_name SEC5; gene_source sgd; gene_biotype protein_coding;	-1	228	divergent	TRUE	TRUE	YDR166C	SEC5	no_peak_overlap	no_peak_overlap
IG_1068_genes-complement	chr04	789221	789448	chr04	789418	790162	+	divergent	1068	sgd	gene	gene_id YDR167W; gene_name TAF10; gene_source sgd; gene_biotype protein_coding;	1	228	divergent	TRUE	TRUE	YDR167W	TAF10	no_peak_overlap	no_peak_overlap
IG_1069_genes-complement	chr04	790069	790327	chr04	790289	791955	+	tandemW	1069	sgd	gene	gene_id YDR168W; gene_name CDC37; gene_source sgd; gene_biotype protein_coding;	1	259	tandem	TRUE	TRUE	YDR168W	CDC37	no_peak_overlap	no_peak_overlap
IG_1071_genes-complement	chr04	793889	794573	chr04	792169	793962	-	tandemC	1071	sgd	gene	gene_id YDR169C; gene_name STB3; gene_source sgd; gene_biotype protein_coding;	-1	685	tandem	TRUE	TRUE	YDR169C	STB3	no_peak_overlap	no_peak_overlap
IG_1072_genes-complement	chr04	794723	796192	chr04	794574	794723	-	tandemC	1072	sgd	gene	gene_id YDR169C-A; gene_source sgd; gene_biotype protein_coding;	-1	1470	tandem	FALSE	TRUE	YDR169C-A		no_peak_overlap	no_peak_overlap
IG_1073_genes-complement	chr04	802222	806620	chr04	806540	807825	+	divergent	1073	sgd	gene	gene_id YDR171W; gene_name HSP42; gene_source sgd; gene_biotype protein_coding;	1	4399	divergent	TRUE	TRUE	YDR171W	HSP42	mild_peak	any_peak_overlap
IG_1073_genes-complement	chr04	802222	806620	chr04	795985	802278	-	divergent	1073	sgd	gene	gene_id YDR170C; gene_name SEC7; gene_source sgd; gene_biotype protein_coding;	-1	4399	divergent	TRUE	TRUE	YDR170C	SEC7	mild_peak	any_peak_overlap
IG_1074_genes-complement	chr04	807748	808323	chr04	808276	810531	+	tandemW	1074	sgd	gene	gene_id YDR172W; gene_name SUP35; gene_source sgd; gene_biotype protein_coding;	1	576	tandem	TRUE	TRUE	YDR172W	SUP35	no_peak_overlap	no_peak_overlap
IG_1076_genes-complement	chr04	811632	812109	chr04	810433	811677	-	divergent	1076	sgd	gene	gene_id YDR173C; gene_name ARG82; gene_source sgd; gene_biotype protein_coding;	-1	478	divergent	TRUE	TRUE	YDR173C	ARG82	mild_peak	any_peak_overlap
IG_1076_genes-complement	chr04	811632	812109	chr04	812081	813026	+	divergent	1076	sgd	gene	gene_id YDR174W; gene_name HMO1; gene_source sgd; gene_biotype protein_coding;	1	478	divergent	TRUE	TRUE	YDR174W	HMO1	mild_peak	any_peak_overlap
IG_1078_genes-complement	chr04	814152	814451	chr04	813066	814198	-	divergent	1078	sgd	gene	gene_id YDR175C; gene_name RSM24; gene_source sgd; gene_biotype protein_coding;	-1	300	divergent	TRUE	TRUE	YDR175C	RSM24	no_peak_overlap	no_peak_overlap
IG_1078_genes-complement	chr04	814152	814451	chr04	814401	816639	+	divergent	1078	sgd	gene	gene_id YDR176W; gene_name NGG1; gene_source sgd; gene_biotype protein_coding;	1	300	divergent	TRUE	TRUE	YDR176W	NGG1	no_peak_overlap	no_peak_overlap
IG_1079_genes-complement	chr04	816560	816877	chr04	816785	817623	+	tandemW	1079	sgd	gene	gene_id YDR177W; gene_name UBC1; gene_source sgd; gene_biotype protein_coding;	1	318	tandem	TRUE	TRUE	YDR177W	UBC1	no_peak_overlap	no_peak_overlap
IG_108_genes-complement	chr02	10551	10846	chr02	9838	10561	-	tandemC	108	sgd	gene	gene_id YBL107C; gene_name MIX23; gene_source sgd; gene_biotype protein_coding;	-1	296	tandem	TRUE	TRUE	YBL107C	MIX23	no_peak_overlap	no_peak_overlap
IG_1080_genes-complement	chr04	817525	817949	chr04	817847	818679	+	tandemW	1080	sgd	gene	gene_id YDR178W; gene_name SDH4; gene_source sgd; gene_biotype protein_coding;	1	425	tandem	TRUE	TRUE	YDR178W	SDH4	no_peak_overlap	no_peak_overlap
IG_1082_genes-complement	chr04	819196	819432	chr04	818588	819216	-	divergent	1082	sgd	gene	gene_id YDR179C; gene_name CSN9; gene_source sgd; gene_biotype protein_coding;	-1	237	divergent	TRUE	TRUE	YDR179C	CSN9	no_peak_overlap	no_peak_overlap
IG_1082_genes-complement	chr04	819196	819432	chr04	819351	820905	+	divergent	1082	sgd	gene	gene_id YDR179W-A; gene_name NVJ3; gene_source sgd; gene_biotype protein_coding;	1	237	divergent	TRUE	TRUE	YDR179W-A	NVJ3	no_peak_overlap	no_peak_overlap
IG_1083_genes-complement	chr04	820824	821294	chr04	821166	825829	+	tandemW	1083	sgd	gene	gene_id YDR180W; gene_name SCC2; gene_source sgd; gene_biotype protein_coding;	1	471	tandem	TRUE	TRUE	YDR180W	SCC2	mild_peak	any_peak_overlap
IG_1085_genes-complement	chr04	827355	827581	chr04	825742	827378	-	divergent	1085	sgd	gene	gene_id YDR181C; gene_name SAS4; gene_source sgd; gene_biotype protein_coding;	-1	227	divergent	TRUE	TRUE	YDR181C	SAS4	no_peak_overlap	no_peak_overlap
IG_1085_genes-complement	chr04	827355	827581	chr04	827541	829164	+	divergent	1085	sgd	gene	gene_id YDR182W; gene_name CDC1; gene_source sgd; gene_biotype protein_coding;	1	227	divergent	TRUE	TRUE	YDR182W	CDC1	no_peak_overlap	no_peak_overlap
IG_1086_genes-complement	chr04	829057	829150	chr04	829107	829422	+	tandemW	1086	sgd	gene	gene_id YDR182W-A; gene_source sgd; gene_biotype protein_coding;	1	94	tandem	TRUE	TRUE	YDR182W-A		no_peak_overlap	no_peak_overlap
IG_1087_genes-complement	chr04	829354	829584	chr04	829554	830346	+	tandemW	1087	sgd	gene	gene_id YDR183W; gene_name PLP1; gene_source sgd; gene_biotype protein_coding;	1	231	tandem	TRUE	TRUE	YDR183W	PLP1	no_peak_overlap	no_peak_overlap
IG_1089_genes-complement	chr04	831513	831933	chr04	830426	831544	-	tandemC	1089	sgd	gene	gene_id YDR184C; gene_name ATC1; gene_source sgd; gene_biotype protein_coding;	-1	421	tandem	TRUE	TRUE	YDR184C	ATC1	no_peak_overlap	no_peak_overlap
IG_109_genes-complement	chr02	13879	14240	chr02	10762	13920	-	tandemC	109	sgd	gene	gene_id YBL106C; gene_name SRO77; gene_source sgd; gene_biotype protein_coding;	-1	362	tandem	TRUE	TRUE	YBL106C	SRO77	no_peak_overlap	no_peak_overlap
IG_1090_genes-complement	chr04	832473	832858	chr04	831766	832565	-	tandemC	1090	sgd	gene	gene_id YDR185C; gene_name UPS3; gene_source sgd; gene_biotype protein_coding;	-1	386	tandem	TRUE	TRUE	YDR185C	UPS3	no_peak_overlap	no_peak_overlap
IG_1091_genes-complement	chr04	835492	836227	chr04	832733	835547	-	tandemC	1091	sgd	gene	gene_id YDR186C; gene_name SND1; gene_source sgd; gene_biotype protein_coding;	-1	736	tandem	TRUE	TRUE	YDR186C	SND1	strong_peak	any_peak_overlap
IG_1092_genes-complement	chr04	838061	838391	chr04	838349	840500	+	tandemW	1092	sgd	gene	gene_id YDR189W; gene_name SLY1; gene_source sgd; gene_biotype protein_coding;	1	331	tandem	TRUE	TRUE	YDR189W	SLY1	no_peak_overlap	no_peak_overlap
IG_1094_genes-complement	chr04	841995	842336	chr04	840512	842035	-	divergent	1094	sgd	gene	gene_id YDR190C; gene_name RVB1; gene_source sgd; gene_biotype protein_coding;	-1	342	divergent	TRUE	TRUE	YDR190C	RVB1	no_peak_overlap	no_peak_overlap
IG_1094_genes-complement	chr04	841995	842336	chr04	842298	843551	+	divergent	1094	sgd	gene	gene_id YDR191W; gene_name HST4; gene_source sgd; gene_biotype protein_coding;	1	342	divergent	TRUE	TRUE	YDR191W	HST4	no_peak_overlap	no_peak_overlap
IG_1097_genes-complement	chr04	847946	848070	chr04	848071	848223	+	divergent	1097	sgd	gene	gene_id YDR194W-A; gene_source sgd; gene_biotype protein_coding;	1	125	divergent	FALSE	TRUE	YDR194W-A		mild_peak	any_peak_overlap
IG_1097_genes-complement	chr04	847946	848070	chr04	845799	847968	-	divergent	1097	sgd	gene	gene_id YDR194C; gene_name MSS116; gene_source sgd; gene_biotype protein_coding;	-1	125	divergent	TRUE	TRUE	YDR194C	MSS116	mild_peak	any_peak_overlap
IG_1098_genes-complement	chr04	848223	848598	chr04	848524	850288	+	tandemW	1098	sgd	gene	gene_id YDR195W; gene_name REF2; gene_source sgd; gene_biotype protein_coding;	1	376	tandem	TRUE	TRUE	YDR195W	REF2	no_peak_overlap	no_peak_overlap
IG_11_genes-complement	chr01	22685	23999	chr01	22351	22806	-	tandemC	11	sgd	gene	gene_id YAL063C-A; gene_source sgd; gene_biotype protein_coding;	-1	1315	tandem	TRUE	TRUE	YAL063C-A		no_peak_overlap	no_peak_overlap
IG_110_genes-complement	chr02	17696	18176	chr02	14104	17764	-	tandemC	110	sgd	gene	gene_id YBL105C; gene_name PKC1; gene_source sgd; gene_biotype protein_coding;	-1	481	tandem	TRUE	TRUE	YBL105C	PKC1	no_peak_overlap	no_peak_overlap
IG_1100_genes-complement	chr04	850999	851227	chr04	850166	851026	-	divergent	1100	sgd	gene	gene_id YDR196C; gene_name CAB5; gene_source sgd; gene_biotype protein_coding;	-1	229	divergent	TRUE	TRUE	YDR196C	CAB5	no_peak_overlap	no_peak_overlap
IG_1100_genes-complement	chr04	850999	851227	chr04	851191	852502	+	divergent	1100	sgd	gene	gene_id YDR197W; gene_name CBS2; gene_source sgd; gene_biotype protein_coding;	1	229	divergent	TRUE	TRUE	YDR197W	CBS2	no_peak_overlap	no_peak_overlap
IG_1102_genes-complement	chr04	853972	854174	chr04	852452	854012	-	divergent	1102	sgd	gene	gene_id YDR198C; gene_name RKM2; gene_source sgd; gene_biotype protein_coding;	-1	203	divergent	TRUE	TRUE	YDR198C	RKM2	no_peak_overlap	no_peak_overlap
IG_1102_genes-complement	chr04	853972	854174	chr04	854175	854540	+	divergent	1102	sgd	gene	gene_id YDR199W; gene_source sgd; gene_biotype protein_coding;	1	203	divergent	FALSE	TRUE	YDR199W		no_peak_overlap	no_peak_overlap
IG_1103_genes-complement	chr04	856093	856316	chr04	854143	856156	-	divergent	1103	sgd	gene	gene_id YDR200C; gene_name VPS64; gene_source sgd; gene_biotype protein_coding;	-1	224	divergent	TRUE	TRUE	YDR200C	VPS64	no_peak_overlap	no_peak_overlap
IG_1103_genes-complement	chr04	856093	856316	chr04	856294	856934	+	divergent	1103	sgd	gene	gene_id YDR201W; gene_name SPC19; gene_source sgd; gene_biotype protein_coding;	1	224	divergent	TRUE	TRUE	YDR201W	SPC19	no_peak_overlap	no_peak_overlap
IG_1105_genes-complement	chr04	857999	858136	chr04	858108	859263	+	tandemW	1105	sgd	gene	gene_id YDR204W; gene_name COQ4; gene_source sgd; gene_biotype protein_coding;	1	138	tandem	TRUE	TRUE	YDR204W	COQ4	no_peak_overlap	no_peak_overlap
IG_1106_genes-complement	chr04	859144	859345	chr04	859322	861584	+	tandemW	1106	sgd	gene	gene_id YDR205W; gene_name MSC2; gene_source sgd; gene_biotype protein_coding;	1	202	tandem	TRUE	TRUE	YDR205W	MSC2	no_peak_overlap	no_peak_overlap
IG_1107_genes-complement	chr04	861520	862053	chr04	861943	864912	+	tandemW	1107	sgd	gene	gene_id YDR206W; gene_name EBS1; gene_source sgd; gene_biotype protein_coding;	1	534	tandem	TRUE	TRUE	YDR206W	EBS1	no_peak_overlap	no_peak_overlap
IG_1109_genes-complement	chr04	867522	868223	chr04	868100	870682	+	divergent	1109	sgd	gene	gene_id YDR208W; gene_name MSS4; gene_source sgd; gene_biotype protein_coding;	1	702	divergent	TRUE	TRUE	YDR208W	MSS4	mild_peak	any_peak_overlap
IG_1109_genes-complement	chr04	867522	868223	chr04	864835	867601	-	divergent	1109	sgd	gene	gene_id YDR207C; gene_name UME6; gene_source sgd; gene_biotype protein_coding;	-1	702	divergent	TRUE	TRUE	YDR207C	UME6	mild_peak	any_peak_overlap
IG_111_genes-complement	chr02	21293	22075	chr02	18103	21308	-	tandemC	111	sgd	gene	gene_id YBL104C; gene_name SEA4; gene_source sgd; gene_biotype protein_coding;	-1	783	tandem	TRUE	TRUE	YBL104C	SEA4	no_peak_overlap	no_peak_overlap
IG_1111_genes-complement	chr04	871449	884726	chr04	871036	871449	-	divergent	1111	sgd	gene	gene_id YDR209C; gene_source sgd; gene_biotype protein_coding;	-1	13278	divergent	FALSE	TRUE	YDR209C		mild_peak	any_peak_overlap
IG_1111_genes-complement	chr04	871449	884726	chr04	884668	887019	+	divergent	1111	sgd	gene	gene_id YDR211W; gene_name GCD6; gene_source sgd; gene_biotype protein_coding;	1	13278	divergent	TRUE	TRUE	YDR211W	GCD6	mild_peak	any_peak_overlap
IG_1112_genes-complement	chr04	886865	887231	chr04	887157	888993	+	tandemW	1112	sgd	gene	gene_id YDR212W; gene_name TCP1; gene_source sgd; gene_biotype protein_coding;	1	367	tandem	TRUE	TRUE	YDR212W	TCP1	no_peak_overlap	no_peak_overlap
IG_1113_genes-complement	chr04	888911	889750	chr04	889642	892679	+	tandemW	1113	sgd	gene	gene_id YDR213W; gene_name UPC2; gene_source sgd; gene_biotype protein_coding;	1	840	tandem	TRUE	TRUE	YDR213W	UPC2	no_peak_overlap	no_peak_overlap
IG_1114_genes-complement	chr04	892492	892874	chr04	892750	894012	+	tandemW	1114	sgd	gene	gene_id YDR214W; gene_name AHA1; gene_source sgd; gene_biotype protein_coding;	1	383	tandem	TRUE	TRUE	YDR214W	AHA1	no_peak_overlap	no_peak_overlap
IG_1116_genes-complement	chr04	894502	895034	chr04	895035	899006	+	divergent	1116	sgd	gene	gene_id YDR216W; gene_name ADR1; gene_source sgd; gene_biotype protein_coding;	1	533	divergent	FALSE	TRUE	YDR216W	ADR1	strong_peak	any_peak_overlap
IG_1116_genes-complement	chr04	894502	895034	chr04	893885	894625	-	divergent	1116	sgd	gene	gene_id YDR215C; gene_source sgd; gene_biotype protein_coding;	-1	533	divergent	TRUE	TRUE	YDR215C		strong_peak	any_peak_overlap
IG_1118_genes-complement	chr04	903480	903780	chr04	899472	903529	-	tandemC	1118	sgd	gene	gene_id YDR217C; gene_name RAD9; gene_source sgd; gene_biotype protein_coding;	-1	301	tandem	TRUE	TRUE	YDR217C	RAD9	no_peak_overlap	no_peak_overlap
IG_1119_genes-complement	chr04	905052	905454	chr04	903689	905112	-	tandemC	1119	sgd	gene	gene_id YDR218C; gene_name SPR28; gene_source sgd; gene_biotype protein_coding;	-1	403	tandem	TRUE	TRUE	YDR218C	SPR28	no_peak_overlap	no_peak_overlap
IG_112_genes-complement	chr02	23536	24097	chr02	21954	23618	-	divergent	112	sgd	gene	gene_id YBL103C; gene_name RTG3; gene_source sgd; gene_biotype protein_coding;	-1	562	divergent	TRUE	TRUE	YBL103C	RTG3	no_peak_overlap	no_peak_overlap
IG_112_genes-complement	chr02	23536	24097	chr02	24016	24922	+	divergent	112	sgd	gene	gene_id YBL102W; gene_name SFT2; gene_source sgd; gene_biotype protein_coding;	1	562	divergent	TRUE	TRUE	YBL102W	SFT2	no_peak_overlap	no_peak_overlap
IG_1120_genes-complement	chr04	906852	906999	chr04	905254	906970	-	tandemC	1120	sgd	gene	gene_id YDR219C; gene_name MFB1; gene_source sgd; gene_biotype protein_coding;	-1	148	tandem	TRUE	TRUE	YDR219C	MFB1	no_peak_overlap	no_peak_overlap
IG_1121_genes-complement	chr04	907293	907329	chr04	907000	907293	-	divergent	1121	sgd	gene	gene_id YDR220C; gene_source sgd; gene_biotype protein_coding;	-1	37	divergent	FALSE	TRUE	YDR220C		no_peak_overlap	no_peak_overlap
IG_1121_genes-complement	chr04	907293	907329	chr04	907307	909614	+	divergent	1121	sgd	gene	gene_id YDR221W; gene_name GTB1; gene_source sgd; gene_biotype protein_coding;	1	37	divergent	TRUE	TRUE	YDR221W	GTB1	no_peak_overlap	no_peak_overlap
IG_1122_genes-complement	chr04	909438	910053	chr04	910008	911448	+	tandemW	1122	sgd	gene	gene_id YDR222W; gene_source sgd; gene_biotype protein_coding;	1	616	tandem	TRUE	TRUE	YDR222W		strong_peak	any_peak_overlap
IG_1123_genes-complement	chr04	911301	912098	chr04	912099	913502	+	tandemW	1123	sgd	gene	gene_id YDR223W; gene_name CRF1; gene_source sgd; gene_biotype protein_coding;	1	798	tandem	FALSE	TRUE	YDR223W	CRF1	mild_peak	any_peak_overlap
IG_1125_genes-complement	chr04	914712	915529	chr04	914196	914751	-	divergent	1125	sgd	gene	gene_id YDR224C; gene_name HTB1; gene_source sgd; gene_biotype protein_coding;	-1	818	divergent	TRUE	TRUE	YDR224C	HTB1	strong_peak	any_peak_overlap
IG_1125_genes-complement	chr04	914712	915529	chr04	915453	916088	+	divergent	1125	sgd	gene	gene_id YDR225W; gene_name HTA1; gene_source sgd; gene_biotype protein_coding;	1	818	divergent	TRUE	TRUE	YDR225W	HTA1	strong_peak	any_peak_overlap
IG_1126_genes-complement	chr04	915928	916485	chr04	916442	917277	+	tandemW	1126	sgd	gene	gene_id YDR226W; gene_name ADK1; gene_source sgd; gene_biotype protein_coding;	1	558	tandem	TRUE	TRUE	YDR226W	ADK1	strong_peak	any_peak_overlap
IG_1127_genes-complement	chr04	917154	917570	chr04	917458	921801	+	tandemW	1127	sgd	gene	gene_id YDR227W; gene_name SIR4; gene_source sgd; gene_biotype protein_coding;	1	417	tandem	TRUE	TRUE	YDR227W	SIR4	no_peak_overlap	no_peak_overlap
IG_1129_genes-complement	chr04	923806	924784	chr04	921846	923888	-	divergent	1129	sgd	gene	gene_id YDR228C; gene_name PCF11; gene_source sgd; gene_biotype protein_coding;	-1	979	divergent	TRUE	TRUE	YDR228C	PCF11	no_peak_overlap	no_peak_overlap
IG_1129_genes-complement	chr04	923806	924784	chr04	924686	926200	+	divergent	1129	sgd	gene	gene_id YDR229W; gene_name IVY1; gene_source sgd; gene_biotype protein_coding;	1	979	divergent	TRUE	TRUE	YDR229W	IVY1	no_peak_overlap	no_peak_overlap
IG_1130_genes-complement	chr04	926146	926222	chr04	926223	926570	+	tandemW	1130	sgd	gene	gene_id YDR230W; gene_source sgd; gene_biotype protein_coding;	1	77	tandem	FALSE	TRUE	YDR230W		no_peak_overlap	no_peak_overlap
IG_1131_genes-complement	chr04	926910	927451	chr04	926129	926963	-	divergent	1131	sgd	gene	gene_id YDR231C; gene_name COX20; gene_source sgd; gene_biotype protein_coding;	-1	542	divergent	TRUE	TRUE	YDR231C	COX20	no_peak_overlap	no_peak_overlap
IG_1131_genes-complement	chr04	926910	927451	chr04	927421	929268	+	divergent	1131	sgd	gene	gene_id YDR232W; gene_name HEM1; gene_source sgd; gene_biotype protein_coding;	1	542	divergent	TRUE	TRUE	YDR232W	HEM1	no_peak_overlap	no_peak_overlap
IG_1133_genes-complement	chr04	930357	931128	chr04	929331	930399	-	divergent	1133	sgd	gene	gene_id YDR233C; gene_name RTN1; gene_source sgd; gene_biotype protein_coding;	-1	772	divergent	TRUE	TRUE	YDR233C	RTN1	mild_peak	any_peak_overlap
IG_1133_genes-complement	chr04	930357	931128	chr04	931068	933319	+	divergent	1133	sgd	gene	gene_id YDR234W; gene_name LYS4; gene_source sgd; gene_biotype protein_coding;	1	772	divergent	TRUE	TRUE	YDR234W	LYS4	mild_peak	any_peak_overlap
IG_1134_genes-complement	chr04	933210	933503	chr04	933479	935213	+	tandemW	1134	sgd	gene	gene_id YDR235W; gene_name PRP42; gene_source sgd; gene_biotype protein_coding;	1	294	tandem	TRUE	TRUE	YDR235W	PRP42	no_peak_overlap	no_peak_overlap
IG_1136_genes-complement	chr04	935892	936614	chr04	935122	935920	-	divergent	1136	sgd	gene	gene_id YDR236C; gene_name FMN1; gene_source sgd; gene_biotype protein_coding;	-1	723	divergent	TRUE	TRUE	YDR236C	FMN1	no_peak_overlap	no_peak_overlap
IG_1136_genes-complement	chr04	935892	936614	chr04	936484	937633	+	divergent	1136	sgd	gene	gene_id YDR237W; gene_name MRPL7; gene_source sgd; gene_biotype protein_coding;	1	723	divergent	TRUE	TRUE	YDR237W	MRPL7	no_peak_overlap	no_peak_overlap
IG_1138_genes-complement	chr04	940816	941056	chr04	937710	940853	-	tandemC	1138	sgd	gene	gene_id YDR238C; gene_name SEC26; gene_source sgd; gene_biotype protein_coding;	-1	241	tandem	TRUE	TRUE	YDR238C	SEC26	no_peak_overlap	no_peak_overlap
IG_1139_genes-complement	chr04	943420	943673	chr04	940979	943446	-	tandemC	1139	sgd	gene	gene_id YDR239C; gene_source sgd; gene_biotype protein_coding;	-1	254	tandem	TRUE	TRUE	YDR239C		no_peak_overlap	no_peak_overlap
IG_114_genes-complement	chr02	28299	28426	chr02	28357	28702	+	divergent	114	sgd	gene	gene_id YBL100W-C; gene_source sgd; gene_biotype protein_coding;	1	128	divergent	TRUE	TRUE	YBL100W-C		strong_peak	any_peak_overlap
IG_114_genes-complement	chr02	28299	28426	chr02	24785	28366	-	divergent	114	sgd	gene	gene_id YBL101C; gene_name ECM21; gene_source sgd; gene_biotype protein_coding;	-1	128	divergent	TRUE	TRUE	YBL101C	ECM21	strong_peak	any_peak_overlap
IG_1140_genes-complement	chr04	945438	946806	chr04	946719	948570	+	tandemW	1140	sgd	gene	gene_id YDR242W; gene_name AMD2; gene_source sgd; gene_biotype protein_coding;	1	1369	tandem	TRUE	TRUE	YDR242W	AMD2	mild_peak	any_peak_overlap
IG_1142_genes-complement	chr04	950284	950562	chr04	950524	952539	+	divergent	1142	sgd	gene	gene_id YDR244W; gene_name PEX5; gene_source sgd; gene_biotype protein_coding;	1	279	divergent	TRUE	TRUE	YDR244W	PEX5	mild_peak	any_peak_overlap
IG_1142_genes-complement	chr04	950284	950562	chr04	948487	950314	-	divergent	1142	sgd	gene	gene_id YDR243C; gene_name PRP28; gene_source sgd; gene_biotype protein_coding;	-1	279	divergent	TRUE	TRUE	YDR243C	PRP28	mild_peak	any_peak_overlap
IG_1143_genes-complement	chr04	952401	952799	chr04	952728	954128	+	tandemW	1143	sgd	gene	gene_id YDR245W; gene_name MNN10; gene_source sgd; gene_biotype protein_coding;	1	399	tandem	TRUE	TRUE	YDR245W	MNN10	mild_peak	any_peak_overlap
IG_1144_genes-complement	chr04	953981	954287	chr04	954267	955105	+	tandemW	1144	sgd	gene	gene_id YDR246W; gene_name TRS23; gene_source sgd; gene_biotype protein_coding;	1	307	tandem	TRUE	TRUE	YDR246W	TRS23	mild_peak	any_peak_overlap
IG_1145_genes-complement	chr04	954947	955132	chr04	955133	955333	+	tandemW	1145	sgd	gene	gene_id YDR246W-A; gene_source sgd; gene_biotype protein_coding;	1	186	tandem	FALSE	TRUE	YDR246W-A		strong_peak	any_peak_overlap
IG_1146_genes-complement	chr04	955333	956012	chr04	955976	957526	+	tandemW	1146	sgd	gene	gene_id YDR247W; gene_name VHS1; gene_source sgd; gene_biotype protein_coding;	1	680	tandem	TRUE	TRUE	YDR247W	VHS1	mild_peak	any_peak_overlap
IG_1146_genes-complement	chr04	955333	956012	chr04	955976	957526	+	tandemW	1146	sgd	gene	gene_id YDR247W; gene_name VHS1; gene_source sgd; gene_biotype protein_coding;	1	680	tandem	TRUE	TRUE	YDR247W	VHS1	strong_peak	any_peak_overlap
IG_1148_genes-complement	chr04	958339	958680	chr04	957658	958401	-	tandemC	1148	sgd	gene	gene_id YDR248C; gene_source sgd; gene_biotype protein_coding;	-1	342	tandem	TRUE	TRUE	YDR248C		no_peak_overlap	no_peak_overlap
IG_1149_genes-complement	chr04	959802	960085	chr04	958535	959847	-	tandemC	1149	sgd	gene	gene_id YDR249C; gene_source sgd; gene_biotype protein_coding;	-1	284	tandem	TRUE	TRUE	YDR249C		mild_peak	any_peak_overlap
IG_1150_genes-complement	chr04	960361	960613	chr04	959918	960422	-	divergent	1150	sgd	gene	gene_id YDR250C; gene_source sgd; gene_biotype protein_coding;	-1	253	divergent	TRUE	TRUE	YDR250C		no_peak_overlap	no_peak_overlap
IG_1150_genes-complement	chr04	960361	960613	chr04	960545	963261	+	divergent	1150	sgd	gene	gene_id YDR251W; gene_name PAM1; gene_source sgd; gene_biotype protein_coding;	1	253	divergent	TRUE	TRUE	YDR251W	PAM1	no_peak_overlap	no_peak_overlap
IG_1151_genes-complement	chr04	963106	963411	chr04	963401	964027	+	tandemW	1151	sgd	gene	gene_id YDR252W; gene_name BTT1; gene_source sgd; gene_biotype protein_coding;	1	306	tandem	TRUE	TRUE	YDR252W	BTT1	no_peak_overlap	no_peak_overlap
IG_1153_genes-complement	chr04	964565	965112	chr04	963911	964657	-	divergent	1153	sgd	gene	gene_id YDR253C; gene_name MET32; gene_source sgd; gene_biotype protein_coding;	-1	548	divergent	TRUE	TRUE	YDR253C	MET32	no_peak_overlap	no_peak_overlap
IG_1153_genes-complement	chr04	964565	965112	chr04	965048	966516	+	divergent	1153	sgd	gene	gene_id YDR254W; gene_name CHL4; gene_source sgd; gene_biotype protein_coding;	1	548	divergent	TRUE	TRUE	YDR254W	CHL4	no_peak_overlap	no_peak_overlap
IG_1155_genes-complement	chr04	967822	968132	chr04	966358	967861	-	tandemC	1155	sgd	gene	gene_id YDR255C; gene_name RMD5; gene_source sgd; gene_biotype protein_coding;	-1	311	tandem	TRUE	TRUE	YDR255C	RMD5	strong_peak	any_peak_overlap
IG_1156_genes-complement	chr04	969680	969989	chr04	967996	969770	-	tandemC	1156	sgd	gene	gene_id YDR256C; gene_name CTA1; gene_source sgd; gene_biotype protein_coding;	-1	310	tandem	TRUE	TRUE	YDR256C	CTA1	strong_peak	any_peak_overlap
IG_1157_genes-complement	chr04	971474	971807	chr04	969763	971487	-	tandemC	1157	sgd	gene	gene_id YDR257C; gene_name RKM4; gene_source sgd; gene_biotype protein_coding;	-1	334	tandem	TRUE	TRUE	YDR257C	RKM4	no_peak_overlap	no_peak_overlap
IG_1158_genes-complement	chr04	974243	974630	chr04	971697	974280	-	tandemC	1158	sgd	gene	gene_id YDR258C; gene_name HSP78; gene_source sgd; gene_biotype protein_coding;	-1	388	tandem	TRUE	TRUE	YDR258C	HSP78	mild_peak	any_peak_overlap
IG_1159_genes-complement	chr04	975782	976716	chr04	974508	975853	-	tandemC	1159	sgd	gene	gene_id YDR259C; gene_name YAP6; gene_source sgd; gene_biotype protein_coding;	-1	935	tandem	TRUE	TRUE	YDR259C	YAP6	strong_peak	any_peak_overlap
IG_116_genes-complement	chr02	38690	39144	chr02	39114	40640	+	tandemW	116	sgd	gene	gene_id YBL098W; gene_name BNA4; gene_source sgd; gene_biotype protein_coding;	1	455	tandem	TRUE	TRUE	YBL098W	BNA4	no_peak_overlap	no_peak_overlap
IG_1160_genes-complement	chr04	977229	977520	chr04	976717	977229	-	tandemC	1160	sgd	gene	gene_id YDR260C; gene_name SWM1; gene_source sgd; gene_biotype protein_coding;	-1	292	tandem	FALSE	TRUE	YDR260C	SWM1	no_peak_overlap	no_peak_overlap
IG_1161_genes-complement	chr04	979209	993133	chr04	993122	994140	+	divergent	1161	sgd	gene	gene_id YDR262W; gene_source sgd; gene_biotype protein_coding;	1	13925	divergent	TRUE	TRUE	YDR262W		mild_peak	any_peak_overlap
IG_1161_genes-complement	chr04	979209	993133	chr04	977391	979259	-	divergent	1161	sgd	gene	gene_id YDR261C; gene_name EXG2; gene_source sgd; gene_biotype protein_coding;	-1	13925	divergent	TRUE	TRUE	YDR261C	EXG2	mild_peak	any_peak_overlap
IG_1163_genes-complement	chr04	995534	996028	chr04	994070	995599	-	tandemC	1163	sgd	gene	gene_id YDR263C; gene_name DIN7; gene_source sgd; gene_biotype protein_coding;	-1	495	tandem	TRUE	TRUE	YDR263C	DIN7	no_peak_overlap	no_peak_overlap
IG_1164_genes-complement	chr04	998323	998863	chr04	995827	998407	-	divergent	1164	sgd	gene	gene_id YDR264C; gene_name AKR1; gene_source sgd; gene_biotype protein_coding;	-1	541	divergent	TRUE	TRUE	YDR264C	AKR1	mild_peak	any_peak_overlap
IG_1164_genes-complement	chr04	998323	998863	chr04	998818	1000065	+	divergent	1164	sgd	gene	gene_id YDR265W; gene_name PEX10; gene_source sgd; gene_biotype protein_coding;	1	541	divergent	TRUE	TRUE	YDR265W	PEX10	mild_peak	any_peak_overlap
IG_1166_genes-complement	chr04	1002023	1002509	chr04	999976	1002143	-	tandemC	1166	sgd	gene	gene_id YDR266C; gene_name HEL2; gene_source sgd; gene_biotype protein_coding;	-1	487	tandem	TRUE	TRUE	YDR266C	HEL2	no_peak_overlap	no_peak_overlap
IG_1167_genes-complement	chr04	1003502	1004003	chr04	1002338	1003564	-	divergent	1167	sgd	gene	gene_id YDR267C; gene_name CIA1; gene_source sgd; gene_biotype protein_coding;	-1	502	divergent	TRUE	TRUE	YDR267C	CIA1	no_peak_overlap	no_peak_overlap
IG_1167_genes-complement	chr04	1003502	1004003	chr04	1003948	1005247	+	divergent	1167	sgd	gene	gene_id YDR268W; gene_name MSW1; gene_source sgd; gene_biotype protein_coding;	1	502	divergent	TRUE	TRUE	YDR268W	MSW1	no_peak_overlap	no_peak_overlap
IG_1169_genes-complement	chr04	1008766	1009009	chr04	1008395	1008766	-	divergent	1169	sgd	gene	gene_id YDR271C; gene_source sgd; gene_biotype protein_coding;	-1	244	divergent	FALSE	TRUE	YDR271C		no_peak_overlap	no_peak_overlap
IG_1169_genes-complement	chr04	1008766	1009009	chr04	1008952	1009899	+	divergent	1169	sgd	gene	gene_id YDR272W; gene_name GLO2; gene_source sgd; gene_biotype protein_coding;	1	244	divergent	TRUE	TRUE	YDR272W	GLO2	no_peak_overlap	no_peak_overlap
IG_117_genes-complement	chr02	40527	40830	chr02	40771	43308	+	tandemW	117	sgd	gene	gene_id YBL097W; gene_name BRN1; gene_source sgd; gene_biotype protein_coding;	1	304	tandem	TRUE	TRUE	YBL097W	BRN1	no_peak_overlap	no_peak_overlap
IG_1170_genes-complement	chr04	1009834	1010175	chr04	1010096	1011334	+	tandemW	1170	sgd	gene	gene_id YDR273W; gene_name DON1; gene_source sgd; gene_biotype protein_coding;	1	342	tandem	TRUE	TRUE	YDR273W	DON1	no_peak_overlap	no_peak_overlap
IG_1172_genes-complement	chr04	1011960	1012251	chr04	1011589	1011960	-	divergent	1172	sgd	gene	gene_id YDR274C; gene_source sgd; gene_biotype protein_coding;	-1	292	divergent	FALSE	TRUE	YDR274C		strong_peak	any_peak_overlap
IG_1172_genes-complement	chr04	1011960	1012251	chr04	1012204	1013151	+	divergent	1172	sgd	gene	gene_id YDR275W; gene_name BSC2; gene_source sgd; gene_biotype protein_coding;	1	292	divergent	TRUE	TRUE	YDR275W	BSC2	strong_peak	any_peak_overlap
IG_1174_genes-complement	chr04	1013643	1014400	chr04	1013259	1013690	-	tandemC	1174	sgd	gene	gene_id YDR276C; gene_name PMP3; gene_source sgd; gene_biotype protein_coding;	-1	758	tandem	TRUE	TRUE	YDR276C	PMP3	strong_peak	any_peak_overlap
IG_1175_genes-complement	chr04	1015702	1017000	chr04	1014202	1015805	-	tandemC	1175	sgd	gene	gene_id YDR277C; gene_name MTH1; gene_source sgd; gene_biotype protein_coding;	-1	1299	tandem	TRUE	TRUE	YDR277C	MTH1	strong_peak	any_peak_overlap
IG_1175_genes-complement	chr04	1015702	1017000	chr04	1014202	1015805	-	tandemC	1175	sgd	gene	gene_id YDR277C; gene_name MTH1; gene_source sgd; gene_biotype protein_coding;	-1	1299	tandem	TRUE	TRUE	YDR277C	MTH1	mild_peak	any_peak_overlap
IG_1176_genes-complement	chr04	1017318	1019367	chr04	1019290	1020454	+	divergent	1176	sgd	gene	gene_id YDR279W; gene_name RNH202; gene_source sgd; gene_biotype protein_coding;	1	2050	divergent	TRUE	TRUE	YDR279W	RNH202	mild_peak	any_peak_overlap
IG_1176_genes-complement	chr04	1017318	1019367	chr04	1016845	1017406	-	divergent	1176	sgd	gene	gene_id YDR278C; gene_source sgd; gene_biotype protein_coding;	-1	2050	divergent	TRUE	TRUE	YDR278C		mild_peak	any_peak_overlap
IG_1177_genes-complement	chr04	1020420	1020746	chr04	1020639	1021768	+	tandemW	1177	sgd	gene	gene_id YDR280W; gene_name RRP45; gene_source sgd; gene_biotype protein_coding;	1	327	tandem	TRUE	TRUE	YDR280W	RRP45	no_peak_overlap	no_peak_overlap
IG_1179_genes-complement	chr04	1022321	1023510	chr04	1021828	1022392	-	tandemC	1179	sgd	gene	gene_id YDR281C; gene_name PHM6; gene_source sgd; gene_biotype protein_coding;	-1	1190	tandem	TRUE	TRUE	YDR281C	PHM6	mild_peak	any_peak_overlap
IG_1180_genes-complement	chr04	1024755	1025069	chr04	1023315	1024765	-	tandemC	1180	sgd	gene	gene_id YDR282C; gene_name MRX10; gene_source sgd; gene_biotype protein_coding;	-1	315	tandem	TRUE	TRUE	YDR282C	MRX10	no_peak_overlap	no_peak_overlap
IG_1181_genes-complement	chr04	1030049	1030549	chr04	1024929	1030148	-	tandemC	1181	sgd	gene	gene_id YDR283C; gene_name GCN2; gene_source sgd; gene_biotype protein_coding;	-1	501	tandem	TRUE	TRUE	YDR283C	GCN2	no_peak_overlap	no_peak_overlap
IG_1182_genes-complement	chr04	1031419	1032435	chr04	1030465	1031524	-	divergent	1182	sgd	gene	gene_id YDR284C; gene_name DPP1; gene_source sgd; gene_biotype protein_coding;	-1	1017	divergent	TRUE	TRUE	YDR284C	DPP1	no_peak_overlap	no_peak_overlap
IG_1182_genes-complement	chr04	1031419	1032435	chr04	1032394	1035218	+	divergent	1182	sgd	gene	gene_id YDR285W; gene_name ZIP1; gene_source sgd; gene_biotype protein_coding;	1	1017	divergent	TRUE	TRUE	YDR285W	ZIP1	no_peak_overlap	no_peak_overlap
IG_1184_genes-complement	chr04	1035575	1035994	chr04	1035959	1036954	+	divergent	1184	sgd	gene	gene_id YDR287W; gene_name INM2; gene_source sgd; gene_biotype protein_coding;	1	420	divergent	TRUE	TRUE	YDR287W	INM2	mild_peak	any_peak_overlap
IG_1184_genes-complement	chr04	1035575	1035994	chr04	1035133	1035588	-	divergent	1184	sgd	gene	gene_id YDR286C; gene_source sgd; gene_biotype protein_coding;	-1	420	divergent	TRUE	TRUE	YDR286C		mild_peak	any_peak_overlap
IG_1185_genes-complement	chr04	1036873	1037194	chr04	1037153	1038237	+	tandemW	1185	sgd	gene	gene_id YDR288W; gene_name NSE3; gene_source sgd; gene_biotype protein_coding;	1	322	tandem	TRUE	TRUE	YDR288W	NSE3	no_peak_overlap	no_peak_overlap
IG_1187_genes-complement	chr04	1039699	1039727	chr04	1039691	1043121	+	tandemW	1187	sgd	gene	gene_id YDR291W; gene_name HRQ1; gene_source sgd; gene_biotype protein_coding;	1	29	tandem	TRUE	TRUE	YDR291W	HRQ1	no_peak_overlap	no_peak_overlap
IG_1189_genes-complement	chr04	1045011	1045639	chr04	1043050	1045142	-	tandemC	1189	sgd	gene	gene_id YDR292C; gene_name SRP101; gene_source sgd; gene_biotype protein_coding;	-1	629	tandem	TRUE	TRUE	YDR292C	SRP101	no_peak_overlap	no_peak_overlap
IG_119_genes-complement	chr02	44097	44255	chr02	43765	44097	-	tandemC	119	sgd	gene	gene_id YBL094C; gene_source sgd; gene_biotype protein_coding;	-1	159	tandem	FALSE	TRUE	YBL094C		no_peak_overlap	no_peak_overlap
IG_1190_genes-complement	chr04	1049392	1050458	chr04	1045446	1049451	-	tandemC	1190	sgd	gene	gene_id YDR293C; gene_name SSD1; gene_source sgd; gene_biotype protein_coding;	-1	1067	tandem	TRUE	TRUE	YDR293C	SSD1	strong_peak	any_peak_overlap
IG_1191_genes-complement	chr04	1052228	1052622	chr04	1050405	1052265	-	tandemC	1191	sgd	gene	gene_id YDR294C; gene_name DPL1; gene_source sgd; gene_biotype protein_coding;	-1	395	tandem	TRUE	TRUE	YDR294C	DPL1	no_peak_overlap	no_peak_overlap
IG_1192_genes-complement	chr04	1054647	1055211	chr04	1052527	1054726	-	divergent	1192	sgd	gene	gene_id YDR295C; gene_name HDA2; gene_source sgd; gene_biotype protein_coding;	-1	565	divergent	TRUE	TRUE	YDR295C	HDA2	mild_peak	any_peak_overlap
IG_1192_genes-complement	chr04	1054647	1055211	chr04	1055157	1056001	+	divergent	1192	sgd	gene	gene_id YDR296W; gene_name MHR1; gene_source sgd; gene_biotype protein_coding;	1	565	divergent	TRUE	TRUE	YDR296W	MHR1	mild_peak	any_peak_overlap
IG_1193_genes-complement	chr04	1055892	1056550	chr04	1056509	1057757	+	tandemW	1193	sgd	gene	gene_id YDR297W; gene_name SUR2; gene_source sgd; gene_biotype protein_coding;	1	659	tandem	TRUE	TRUE	YDR297W	SUR2	mild_peak	any_peak_overlap
IG_1195_genes-complement	chr04	1058814	1059626	chr04	1057999	1058938	-	divergent	1195	sgd	gene	gene_id YDR298C; gene_name ATP5; gene_source sgd; gene_biotype protein_coding;	-1	813	divergent	TRUE	TRUE	YDR298C	ATP5	no_peak_overlap	no_peak_overlap
IG_1195_genes-complement	chr04	1058814	1059626	chr04	1059584	1061322	+	divergent	1195	sgd	gene	gene_id YDR299W; gene_name BFR2; gene_source sgd; gene_biotype protein_coding;	1	813	divergent	TRUE	TRUE	YDR299W	BFR2	no_peak_overlap	no_peak_overlap
IG_1197_genes-complement	chr04	1062791	1063351	chr04	1061392	1062838	-	divergent	1197	sgd	gene	gene_id YDR300C; gene_name PRO1; gene_source sgd; gene_biotype protein_coding;	-1	561	divergent	TRUE	TRUE	YDR300C	PRO1	no_peak_overlap	no_peak_overlap
IG_1197_genes-complement	chr04	1062791	1063351	chr04	1063280	1067551	+	divergent	1197	sgd	gene	gene_id YDR301W; gene_name CFT1; gene_source sgd; gene_biotype protein_coding;	1	561	divergent	TRUE	TRUE	YDR301W	CFT1	no_peak_overlap	no_peak_overlap
IG_1198_genes-complement	chr04	1067425	1067730	chr04	1067685	1068472	+	tandemW	1198	sgd	gene	gene_id YDR302W; gene_name GPI11; gene_source sgd; gene_biotype protein_coding;	1	306	tandem	TRUE	TRUE	YDR302W	GPI11	no_peak_overlap	no_peak_overlap
IG_12_genes-complement	chr01	27968	31566	chr01	31513	33019	+	divergent	12	sgd	gene	gene_id YAL062W; gene_name GDH3; gene_source sgd; gene_biotype protein_coding;	1	3599	divergent	TRUE	TRUE	YAL062W	GDH3	mild_peak	any_peak_overlap
IG_12_genes-complement	chr01	27968	31566	chr01	31513	33019	+	divergent	12	sgd	gene	gene_id YAL062W; gene_name GDH3; gene_source sgd; gene_biotype protein_coding;	1	3599	divergent	TRUE	TRUE	YAL062W	GDH3	strong_peak	any_peak_overlap
IG_12_genes-complement	chr01	27968	31566	chr01	23905	27992	-	divergent	12	sgd	gene	gene_id YAL063C; gene_name FLO9; gene_source sgd; gene_biotype protein_coding;	-1	3599	divergent	TRUE	TRUE	YAL063C	FLO9	mild_peak	any_peak_overlap
IG_12_genes-complement	chr01	27968	31566	chr01	23905	27992	-	divergent	12	sgd	gene	gene_id YAL063C; gene_name FLO9; gene_source sgd; gene_biotype protein_coding;	-1	3599	divergent	TRUE	TRUE	YAL063C	FLO9	strong_peak	any_peak_overlap
IG_120_genes-complement	chr02	44918	45977	chr02	45597	46486	+	divergent	120	sgd	gene	gene_id YBL092W; gene_name RPL32; gene_source sgd; gene_biotype protein_coding;	1	1060	divergent	TRUE	TRUE	YBL092W	RPL32	mild_peak	any_peak_overlap
IG_120_genes-complement	chr02	44918	45977	chr02	44109	45007	-	divergent	120	sgd	gene	gene_id YBL093C; gene_name ROX3; gene_source sgd; gene_biotype protein_coding;	-1	1060	divergent	TRUE	TRUE	YBL093C	ROX3	mild_peak	any_peak_overlap
IG_1200_genes-complement	chr04	1071386	1071879	chr04	1068613	1071464	-	tandemC	1200	sgd	gene	gene_id YDR303C; gene_name RSC3; gene_source sgd; gene_biotype protein_coding;	-1	494	tandem	TRUE	TRUE	YDR303C	RSC3	no_peak_overlap	no_peak_overlap
IG_1201_genes-complement	chr04	1072557	1072745	chr04	1071801	1072587	-	tandemC	1201	sgd	gene	gene_id YDR304C; gene_name CPR5; gene_source sgd; gene_biotype protein_coding;	-1	189	tandem	TRUE	TRUE	YDR304C	CPR5	no_peak_overlap	no_peak_overlap
IG_1202_genes-complement	chr04	1073488	1073734	chr04	1072672	1073534	-	tandemC	1202	sgd	gene	gene_id YDR305C; gene_name HNT2; gene_source sgd; gene_biotype protein_coding;	-1	247	tandem	TRUE	TRUE	YDR305C	HNT2	no_peak_overlap	no_peak_overlap
IG_1203_genes-complement	chr04	1075171	1075864	chr04	1073625	1075216	-	divergent	1203	sgd	gene	gene_id YDR306C; gene_source sgd; gene_biotype protein_coding;	-1	694	divergent	TRUE	TRUE	YDR306C		mild_peak	any_peak_overlap
IG_1203_genes-complement	chr04	1075171	1075864	chr04	1075814	1077990	+	divergent	1203	sgd	gene	gene_id YDR307W; gene_name PMT7; gene_source sgd; gene_biotype protein_coding;	1	694	divergent	TRUE	TRUE	YDR307W	PMT7	mild_peak	any_peak_overlap
IG_1205_genes-complement	chr04	1078449	1079047	chr04	1077893	1078488	-	tandemC	1205	sgd	gene	gene_id YDR308C; gene_name SRB7; gene_source sgd; gene_biotype protein_coding;	-1	599	tandem	TRUE	TRUE	YDR308C	SRB7	no_peak_overlap	no_peak_overlap
IG_1206_genes-complement	chr04	1080199	1081127	chr04	1078995	1080257	-	tandemC	1206	sgd	gene	gene_id YDR309C; gene_name GIC2; gene_source sgd; gene_biotype protein_coding;	-1	929	tandem	TRUE	TRUE	YDR309C	GIC2	strong_peak	any_peak_overlap
IG_1207_genes-complement	chr04	1084316	1085064	chr04	1080944	1084411	-	divergent	1207	sgd	gene	gene_id YDR310C; gene_name SUM1; gene_source sgd; gene_biotype protein_coding;	-1	749	divergent	TRUE	TRUE	YDR310C	SUM1	no_peak_overlap	no_peak_overlap
IG_1207_genes-complement	chr04	1084316	1085064	chr04	1085036	1087093	+	divergent	1207	sgd	gene	gene_id YDR311W; gene_name TFB1; gene_source sgd; gene_biotype protein_coding;	1	749	divergent	TRUE	TRUE	YDR311W	TFB1	no_peak_overlap	no_peak_overlap
IG_1208_genes-complement	chr04	1086993	1087580	chr04	1087541	1089089	+	tandemW	1208	sgd	gene	gene_id YDR312W; gene_name SSF2; gene_source sgd; gene_biotype protein_coding;	1	588	tandem	TRUE	TRUE	YDR312W	SSF2	strong_peak	any_peak_overlap
IG_1210_genes-complement	chr04	1090079	1090432	chr04	1089062	1090146	-	tandemC	1210	sgd	gene	gene_id YDR313C; gene_name PIB1; gene_source sgd; gene_biotype protein_coding;	-1	354	tandem	TRUE	TRUE	YDR313C	PIB1	mild_peak	any_peak_overlap
IG_1211_genes-complement	chr04	1092511	1092740	chr04	1090364	1092558	-	tandemC	1211	sgd	gene	gene_id YDR314C; gene_name RAD34; gene_source sgd; gene_biotype protein_coding;	-1	230	tandem	TRUE	TRUE	YDR314C	RAD34	no_peak_overlap	no_peak_overlap
IG_1212_genes-complement	chr04	1093586	1093762	chr04	1092640	1093600	-	divergent	1212	sgd	gene	gene_id YDR315C; gene_name IPK1; gene_source sgd; gene_biotype protein_coding;	-1	177	divergent	TRUE	TRUE	YDR315C	IPK1	no_peak_overlap	no_peak_overlap
IG_1212_genes-complement	chr04	1093586	1093762	chr04	1093742	1095251	+	divergent	1212	sgd	gene	gene_id YDR316W; gene_name OMS1; gene_source sgd; gene_biotype protein_coding;	1	177	divergent	TRUE	TRUE	YDR316W	OMS1	no_peak_overlap	no_peak_overlap
IG_1213_genes-complement	chr04	1095178	1102183	chr04	1102134	1103558	+	tandemW	1213	sgd	gene	gene_id YDR317W; gene_name HIM1; gene_source sgd; gene_biotype protein_coding;	1	7006	tandem	TRUE	TRUE	YDR317W	HIM1	strong_peak	any_peak_overlap
IG_1214_genes-complement	chr04	1103428	1103757	chr04	1103731	1105067	+	tandemW	1214	sgd	gene	gene_id YDR318W; gene_name MCM21; gene_source sgd; gene_biotype protein_coding;	1	330	tandem	TRUE	TRUE	YDR318W	MCM21	no_peak_overlap	no_peak_overlap
IG_1216_genes-complement	chr04	1105827	1106094	chr04	1104922	1105898	-	tandemC	1216	sgd	gene	gene_id YDR319C; gene_source sgd; gene_biotype protein_coding;	-1	268	tandem	TRUE	TRUE	YDR319C		no_peak_overlap	no_peak_overlap
IG_1217_genes-complement	chr04	1108101	1108279	chr04	1106001	1108121	-	tandemC	1217	sgd	gene	gene_id YDR320C; gene_name SWA2; gene_source sgd; gene_biotype protein_coding;	-1	179	tandem	TRUE	TRUE	YDR320C	SWA2	no_peak_overlap	no_peak_overlap
IG_1218_genes-complement	chr04	1108621	1108701	chr04	1108668	1109954	+	tandemW	1218	sgd	gene	gene_id YDR321W; gene_name ASP1; gene_source sgd; gene_biotype protein_coding;	1	81	tandem	TRUE	TRUE	YDR321W	ASP1	no_peak_overlap	no_peak_overlap
IG_1219_genes-complement	chr04	1109847	1110588	chr04	1110570	1111784	+	tandemW	1219	sgd	gene	gene_id YDR322W; gene_name MRPL35; gene_source sgd; gene_biotype protein_coding;	1	742	tandem	TRUE	TRUE	YDR322W	MRPL35	no_peak_overlap	no_peak_overlap
IG_122_genes-complement	chr02	47180	47362	chr02	46408	47201	-	tandemC	122	sgd	gene	gene_id YBL091C-A; gene_name SCS22; gene_source sgd; gene_biotype protein_coding;	-1	183	tandem	TRUE	TRUE	YBL091C-A	SCS22	no_peak_overlap	no_peak_overlap
IG_1221_genes-complement	chr04	1112293	1112479	chr04	1111798	1112320	-	tandemC	1221	sgd	gene	gene_id YDR322C-A; gene_name TIM11; gene_source sgd; gene_biotype protein_coding;	-1	187	tandem	TRUE	TRUE	YDR322C-A	TIM11	no_peak_overlap	no_peak_overlap
IG_1222_genes-complement	chr04	1114027	1114432	chr04	1112317	1114063	-	tandemC	1222	sgd	gene	gene_id YDR323C; gene_name PEP7; gene_source sgd; gene_biotype protein_coding;	-1	406	tandem	TRUE	TRUE	YDR323C	PEP7	no_peak_overlap	no_peak_overlap
IG_1223_genes-complement	chr04	1116763	1117125	chr04	1114239	1116776	-	divergent	1223	sgd	gene	gene_id YDR324C; gene_name UTP4; gene_source sgd; gene_biotype protein_coding;	-1	363	divergent	TRUE	TRUE	YDR324C	UTP4	no_peak_overlap	no_peak_overlap
IG_1223_genes-complement	chr04	1116763	1117125	chr04	1117097	1120301	+	divergent	1223	sgd	gene	gene_id YDR325W; gene_name YCG1; gene_source sgd; gene_biotype protein_coding;	1	363	divergent	TRUE	TRUE	YDR325W	YCG1	no_peak_overlap	no_peak_overlap
IG_1225_genes-complement	chr04	1124925	1125301	chr04	1125302	1125628	+	divergent	1225	sgd	gene	gene_id YDR327W; gene_source sgd; gene_biotype protein_coding;	1	377	divergent	FALSE	TRUE	YDR327W		mild_peak	any_peak_overlap
IG_1225_genes-complement	chr04	1124925	1125301	chr04	1120464	1125028	-	divergent	1225	sgd	gene	gene_id YDR326C; gene_name YSP2; gene_source sgd; gene_biotype protein_coding;	-1	377	divergent	TRUE	TRUE	YDR326C	YSP2	mild_peak	any_peak_overlap
IG_1226_genes-complement	chr04	1126018	1126269	chr04	1125231	1126073	-	tandemC	1226	sgd	gene	gene_id YDR328C; gene_name SKP1; gene_source sgd; gene_biotype protein_coding;	-1	252	tandem	TRUE	TRUE	YDR328C	SKP1	mild_peak	any_peak_overlap
IG_1227_genes-complement	chr04	1127595	1127871	chr04	1126192	1127619	-	divergent	1227	sgd	gene	gene_id YDR329C; gene_name PEX3; gene_source sgd; gene_biotype protein_coding;	-1	277	divergent	TRUE	TRUE	YDR329C	PEX3	no_peak_overlap	no_peak_overlap
IG_1227_genes-complement	chr04	1127595	1127871	chr04	1127812	1129531	+	divergent	1227	sgd	gene	gene_id YDR330W; gene_name UBX5; gene_source sgd; gene_biotype protein_coding;	1	277	divergent	TRUE	TRUE	YDR330W	UBX5	no_peak_overlap	no_peak_overlap
IG_1228_genes-complement	chr04	1129374	1129587	chr04	1129560	1130918	+	tandemW	1228	sgd	gene	gene_id YDR331W; gene_name GPI8; gene_source sgd; gene_biotype protein_coding;	1	214	tandem	TRUE	TRUE	YDR331W	GPI8	no_peak_overlap	no_peak_overlap
IG_1229_genes-complement	chr04	1130823	1131000	chr04	1130962	1133136	+	tandemW	1229	sgd	gene	gene_id YDR332W; gene_name IRC3; gene_source sgd; gene_biotype protein_coding;	1	178	tandem	TRUE	TRUE	YDR332W	IRC3	no_peak_overlap	no_peak_overlap
IG_123_genes-complement	chr02	48628	48824	chr02	47248	48653	-	divergent	123	sgd	gene	gene_id YBL091C; gene_name MAP2; gene_source sgd; gene_biotype protein_coding;	-1	197	divergent	TRUE	TRUE	YBL091C	MAP2	no_peak_overlap	no_peak_overlap
IG_123_genes-complement	chr02	48628	48824	chr02	48795	49472	+	divergent	123	sgd	gene	gene_id YBL090W; gene_name MRP21; gene_source sgd; gene_biotype protein_coding;	1	197	divergent	TRUE	TRUE	YBL090W	MRP21	no_peak_overlap	no_peak_overlap
IG_1231_genes-complement	chr04	1135431	1135931	chr04	1135824	1140585	+	divergent	1231	sgd	gene	gene_id YDR334W; gene_name SWR1; gene_source sgd; gene_biotype protein_coding;	1	501	divergent	TRUE	TRUE	YDR334W	SWR1	mild_peak	any_peak_overlap
IG_1231_genes-complement	chr04	1135431	1135931	chr04	1133037	1135454	-	divergent	1231	sgd	gene	gene_id YDR333C; gene_name RQC1; gene_source sgd; gene_biotype protein_coding;	-1	501	divergent	TRUE	TRUE	YDR333C	RQC1	mild_peak	any_peak_overlap
IG_1232_genes-complement	chr04	1140476	1141167	chr04	1141087	1144925	+	tandemW	1232	sgd	gene	gene_id YDR335W; gene_name MSN5; gene_source sgd; gene_biotype protein_coding;	1	692	tandem	TRUE	TRUE	YDR335W	MSN5	mild_peak	any_peak_overlap
IG_1233_genes-complement	chr04	1144842	1145091	chr04	1145058	1146099	+	tandemW	1233	sgd	gene	gene_id YDR336W; gene_name MRX8; gene_source sgd; gene_biotype protein_coding;	1	250	tandem	TRUE	TRUE	YDR336W	MRX8	no_peak_overlap	no_peak_overlap
IG_1234_genes-complement	chr04	1146036	1146318	chr04	1146272	1147245	+	tandemW	1234	sgd	gene	gene_id YDR337W; gene_name MRPS28; gene_source sgd; gene_biotype protein_coding;	1	283	tandem	TRUE	TRUE	YDR337W	MRPS28	mild_peak	any_peak_overlap
IG_1236_genes-complement	chr04	1149466	1149950	chr04	1147244	1149526	-	tandemC	1236	sgd	gene	gene_id YDR338C; gene_source sgd; gene_biotype protein_coding;	-1	485	tandem	TRUE	TRUE	YDR338C		no_peak_overlap	no_peak_overlap
IG_1237_genes-complement	chr04	1150520	1150880	chr04	1149856	1150548	-	divergent	1237	sgd	gene	gene_id YDR339C; gene_name FCF1; gene_source sgd; gene_biotype protein_coding;	-1	361	divergent	TRUE	TRUE	YDR339C	FCF1	mild_peak	any_peak_overlap
IG_1237_genes-complement	chr04	1150520	1150880	chr04	1150785	1151304	+	divergent	1237	sgd	gene	gene_id YDR340W; gene_source sgd; gene_biotype protein_coding;	1	361	divergent	TRUE	TRUE	YDR340W		mild_peak	any_peak_overlap
IG_1239_genes-complement	chr04	1153626	1154215	chr04	1151664	1153657	-	tandemC	1239	sgd	gene	gene_id YDR341C; gene_source sgd; gene_biotype protein_coding;	-1	590	tandem	TRUE	TRUE	YDR341C		mild_peak	any_peak_overlap
IG_124_genes-complement	chr02	49358	49573	chr02	49551	51019	+	tandemW	124	sgd	gene	gene_id YBL089W; gene_name AVT5; gene_source sgd; gene_biotype protein_coding;	1	216	tandem	TRUE	TRUE	YBL089W	AVT5	no_peak_overlap	no_peak_overlap
IG_1240_genes-complement	chr04	1155928	1159607	chr04	1154064	1156013	-	tandemC	1240	sgd	gene	gene_id YDR342C; gene_name HXT7; gene_source sgd; gene_biotype protein_coding;	-1	3680	tandem	TRUE	TRUE	YDR342C	HXT7	strong_peak	any_peak_overlap
IG_1241_genes-complement	chr04	1161320	1162005	chr04	1159459	1161399	-	tandemC	1241	sgd	gene	gene_id YDR343C; gene_name HXT6; gene_source sgd; gene_biotype protein_coding;	-1	686	tandem	TRUE	TRUE	YDR343C	HXT6	strong_peak	any_peak_overlap
IG_1242_genes-complement	chr04	1162449	1162956	chr04	1162006	1162449	-	tandemC	1242	sgd	gene	gene_id YDR344C; gene_source sgd; gene_biotype protein_coding;	-1	508	tandem	FALSE	TRUE	YDR344C		strong_peak	any_peak_overlap
IG_1243_genes-complement	chr04	1164660	1167213	chr04	1162810	1164691	-	tandemC	1243	sgd	gene	gene_id YDR345C; gene_name HXT3; gene_source sgd; gene_biotype protein_coding;	-1	2554	tandem	TRUE	TRUE	YDR345C	HXT3	strong_peak	any_peak_overlap
IG_1244_genes-complement	chr04	1168659	1169177	chr04	1169095	1170254	+	divergent	1244	sgd	gene	gene_id YDR347W; gene_name MRP1; gene_source sgd; gene_biotype protein_coding;	1	519	divergent	TRUE	TRUE	YDR347W	MRP1	mild_peak	any_peak_overlap
IG_1244_genes-complement	chr04	1168659	1169177	chr04	1167041	1168756	-	divergent	1244	sgd	gene	gene_id YDR346C; gene_name SVF1; gene_source sgd; gene_biotype protein_coding;	-1	519	divergent	TRUE	TRUE	YDR346C	SVF1	mild_peak	any_peak_overlap
IG_1246_genes-complement	chr04	1171825	1172385	chr04	1170152	1171938	-	tandemC	1246	sgd	gene	gene_id YDR348C; gene_name PAL1; gene_source sgd; gene_biotype protein_coding;	-1	561	tandem	TRUE	TRUE	YDR348C	PAL1	no_peak_overlap	no_peak_overlap
IG_1247_genes-complement	chr04	1174176	1176119	chr04	1172259	1174258	-	tandemC	1247	sgd	gene	gene_id YDR349C; gene_name YPS7; gene_source sgd; gene_biotype protein_coding;	-1	1944	tandem	TRUE	TRUE	YDR349C	YPS7	mild_peak	any_peak_overlap
IG_1248_genes-complement	chr04	1178174	1178665	chr04	1176037	1178207	-	divergent	1248	sgd	gene	gene_id YDR350C; gene_name ATP22; gene_source sgd; gene_biotype protein_coding;	-1	492	divergent	TRUE	TRUE	YDR350C	ATP22	no_peak_overlap	no_peak_overlap
IG_1248_genes-complement	chr04	1178174	1178665	chr04	1178595	1181399	+	divergent	1248	sgd	gene	gene_id YDR351W; gene_name SBE2; gene_source sgd; gene_biotype protein_coding;	1	492	divergent	TRUE	TRUE	YDR351W	SBE2	no_peak_overlap	no_peak_overlap
IG_1249_genes-complement	chr04	1181260	1181800	chr04	1181710	1182957	+	tandemW	1249	sgd	gene	gene_id YDR352W; gene_name YPQ2; gene_source sgd; gene_biotype protein_coding;	1	541	tandem	TRUE	TRUE	YDR352W	YPQ2	no_peak_overlap	no_peak_overlap
IG_1250_genes-complement	chr04	1182754	1183298	chr04	1183249	1184357	+	tandemW	1250	sgd	gene	gene_id YDR353W; gene_name TRR1; gene_source sgd; gene_biotype protein_coding;	1	545	tandem	TRUE	TRUE	YDR353W	TRR1	strong_peak	any_peak_overlap
IG_1251_genes-complement	chr04	1184258	1184746	chr04	1184694	1185950	+	tandemW	1251	sgd	gene	gene_id YDR354W; gene_name TRP4; gene_source sgd; gene_biotype protein_coding;	1	489	tandem	TRUE	TRUE	YDR354W	TRP4	strong_peak	any_peak_overlap
IG_1254_genes-complement	chr04	1189567	1190058	chr04	1190009	1191898	+	divergent	1254	sgd	gene	gene_id YDR358W; gene_name GGA1; gene_source sgd; gene_biotype protein_coding;	1	492	divergent	TRUE	TRUE	YDR358W	GGA1	strong_peak	any_peak_overlap
IG_1254_genes-complement	chr04	1189567	1190058	chr04	1189126	1189641	-	divergent	1254	sgd	gene	gene_id YDR357C; gene_name CNL1; gene_source sgd; gene_biotype protein_coding;	-1	492	divergent	TRUE	TRUE	YDR357C	CNL1	strong_peak	any_peak_overlap
IG_1257_genes-complement	chr04	1196263	1196678	chr04	1195300	1196296	-	tandemC	1257	sgd	gene	gene_id YDR361C; gene_name BCP1; gene_source sgd; gene_biotype protein_coding;	-1	416	tandem	TRUE	TRUE	YDR361C	BCP1	no_peak_overlap	no_peak_overlap
IG_1258_genes-complement	chr04	1198697	1199182	chr04	1196575	1198796	-	divergent	1258	sgd	gene	gene_id YDR362C; gene_name TFC6; gene_source sgd; gene_biotype protein_coding;	-1	486	divergent	TRUE	TRUE	YDR362C	TFC6	mild_peak	any_peak_overlap
IG_1258_genes-complement	chr04	1198697	1199182	chr04	1199048	1200704	+	divergent	1258	sgd	gene	gene_id YDR363W; gene_name ESC2; gene_source sgd; gene_biotype protein_coding;	1	486	divergent	TRUE	TRUE	YDR363W	ESC2	mild_peak	any_peak_overlap
IG_1259_genes-complement	chr04	1200553	1202127	chr04	1202106	1202542	+	tandemW	1259	sgd	gene	gene_id YDR363W-A; gene_name SEM1; gene_source sgd; gene_biotype protein_coding;	1	1575	tandem	TRUE	TRUE	YDR363W-A	SEM1	mild_peak	any_peak_overlap
IG_126_genes-complement	chr02	59382	59821	chr02	50934	59431	-	tandemC	126	sgd	gene	gene_id YBL088C; gene_name TEL1; gene_source sgd; gene_biotype protein_coding;	-1	440	tandem	TRUE	TRUE	YBL088C	TEL1	no_peak_overlap	no_peak_overlap
IG_1261_genes-complement	chr04	1204210	1204496	chr04	1202700	1204233	-	tandemC	1261	sgd	gene	gene_id YDR364C; gene_name CDC40; gene_source sgd; gene_biotype protein_coding;	-1	287	tandem	TRUE	TRUE	YDR364C	CDC40	no_peak_overlap	no_peak_overlap
IG_1262_genes-complement	chr04	1206383	1212437	chr04	1204402	1206446	-	tandemC	1262	sgd	gene	gene_id YDR365C; gene_name ESF1; gene_source sgd; gene_biotype protein_coding;	-1	6055	tandem	TRUE	TRUE	YDR365C	ESF1	no_peak_overlap	no_peak_overlap
IG_1263_genes-complement	chr04	1212836	1212847	chr04	1212438	1212836	-	divergent	1263	sgd	gene	gene_id YDR366C; gene_source sgd; gene_biotype protein_coding;	-1	12	divergent	FALSE	TRUE	YDR366C		no_peak_overlap	no_peak_overlap
IG_1263_genes-complement	chr04	1212836	1212847	chr04	1212766	1213663	+	divergent	1263	sgd	gene	gene_id YDR367W; gene_name KEI1; gene_source sgd; gene_biotype protein_coding;	1	12	divergent	TRUE	TRUE	YDR367W	KEI1	no_peak_overlap	no_peak_overlap
IG_1264_genes-complement	chr04	1213614	1213903	chr04	1213829	1214994	+	tandemW	1264	sgd	gene	gene_id YDR368W; gene_name YPR1; gene_source sgd; gene_biotype protein_coding;	1	290	tandem	TRUE	TRUE	YDR368W	YPR1	no_peak_overlap	no_peak_overlap
IG_1266_genes-complement	chr04	1217580	1217781	chr04	1214899	1217610	-	tandemC	1266	sgd	gene	gene_id YDR369C; gene_name XRS2; gene_source sgd; gene_biotype protein_coding;	-1	202	tandem	TRUE	TRUE	YDR369C	XRS2	no_peak_overlap	no_peak_overlap
IG_1267_genes-complement	chr04	1219110	1219412	chr04	1217707	1219121	-	divergent	1267	sgd	gene	gene_id YDR370C; gene_name DXO1; gene_source sgd; gene_biotype protein_coding;	-1	303	divergent	TRUE	TRUE	YDR370C	DXO1	no_peak_overlap	no_peak_overlap
IG_1267_genes-complement	chr04	1219110	1219412	chr04	1219362	1221068	+	divergent	1267	sgd	gene	gene_id YDR371W; gene_name CTS2; gene_source sgd; gene_biotype protein_coding;	1	303	divergent	TRUE	TRUE	YDR371W	CTS2	no_peak_overlap	no_peak_overlap
IG_1269_genes-complement	chr04	1222149	1222758	chr04	1220954	1222208	-	divergent	1269	sgd	gene	gene_id YDR372C; gene_name VPS74; gene_source sgd; gene_biotype protein_coding;	-1	610	divergent	TRUE	TRUE	YDR372C	VPS74	no_peak_overlap	no_peak_overlap
IG_1269_genes-complement	chr04	1222149	1222758	chr04	1222693	1223431	+	divergent	1269	sgd	gene	gene_id YDR373W; gene_name FRQ1; gene_source sgd; gene_biotype protein_coding;	1	610	divergent	TRUE	TRUE	YDR373W	FRQ1	no_peak_overlap	no_peak_overlap
IG_127_genes-complement	chr02	60739	61201	chr02	59718	60772	-	tandemC	127	sgd	gene	gene_id YBL087C; gene_name RPL23A; gene_source sgd; gene_biotype protein_coding;	-1	463	tandem	TRUE	TRUE	YBL087C	RPL23A	strong_peak	any_peak_overlap
IG_1271_genes-complement	chr04	1224394	1224756	chr04	1223297	1224461	-	divergent	1271	sgd	gene	gene_id YDR374C; gene_name PHO92; gene_source sgd; gene_biotype protein_coding;	-1	363	divergent	TRUE	TRUE	YDR374C	PHO92	no_peak_overlap	no_peak_overlap
IG_1271_genes-complement	chr04	1224394	1224756	chr04	1224735	1225167	+	divergent	1271	sgd	gene	gene_id YDR374W-A; gene_name WIP1; gene_source sgd; gene_biotype protein_coding;	1	363	divergent	TRUE	TRUE	YDR374W-A	WIP1	no_peak_overlap	no_peak_overlap
IG_1273_genes-complement	chr04	1226536	1226821	chr04	1225092	1226583	-	divergent	1273	sgd	gene	gene_id YDR375C; gene_name BCS1; gene_source sgd; gene_biotype protein_coding;	-1	286	divergent	TRUE	TRUE	YDR375C	BCS1	no_peak_overlap	no_peak_overlap
IG_1273_genes-complement	chr04	1226536	1226821	chr04	1226762	1228370	+	divergent	1273	sgd	gene	gene_id YDR376W; gene_name ARH1; gene_source sgd; gene_biotype protein_coding;	1	286	divergent	TRUE	TRUE	YDR376W	ARH1	no_peak_overlap	no_peak_overlap
IG_1274_genes-complement	chr04	1228303	1228610	chr04	1228543	1229061	+	tandemW	1274	sgd	gene	gene_id YDR377W; gene_name ATP17; gene_source sgd; gene_biotype protein_coding;	1	308	tandem	TRUE	TRUE	YDR377W	ATP17	no_peak_overlap	no_peak_overlap
IG_1276_genes-complement	chr04	1229609	1230166	chr04	1229165	1229625	-	divergent	1276	sgd	gene	gene_id YDR378C; gene_name LSM6; gene_source sgd; gene_biotype protein_coding;	-1	558	divergent	TRUE	TRUE	YDR378C	LSM6	no_peak_overlap	no_peak_overlap
IG_1276_genes-complement	chr04	1229609	1230166	chr04	1230098	1233266	+	divergent	1276	sgd	gene	gene_id YDR379W; gene_name RGA2; gene_source sgd; gene_biotype protein_coding;	1	558	divergent	TRUE	TRUE	YDR379W	RGA2	no_peak_overlap	no_peak_overlap
IG_1278_genes-complement	chr04	1233517	1234217	chr04	1234117	1236242	+	divergent	1278	sgd	gene	gene_id YDR380W; gene_name ARO10; gene_source sgd; gene_biotype protein_coding;	1	701	divergent	TRUE	TRUE	YDR380W	ARO10	strong_peak	any_peak_overlap
IG_1278_genes-complement	chr04	1233517	1234217	chr04	1233153	1233573	-	divergent	1278	sgd	gene	gene_id YDR379C-A; gene_name SDH6; gene_source sgd; gene_biotype protein_coding;	-1	701	divergent	TRUE	TRUE	YDR379C-A	SDH6	strong_peak	any_peak_overlap
IG_1279_genes-complement	chr04	1236125	1236557	chr04	1236468	1238148	+	tandemW	1279	sgd	gene	gene_id YDR381W; gene_name YRA1; gene_source sgd; gene_biotype protein_coding;	1	433	tandem	TRUE	TRUE	YDR381W	YRA1	mild_peak	any_peak_overlap
IG_128_genes-complement	chr02	62602	63875	chr02	63750	66930	+	divergent	128	sgd	gene	gene_id YBL085W; gene_name BOI1; gene_source sgd; gene_biotype protein_coding;	1	1274	divergent	TRUE	TRUE	YBL085W	BOI1	mild_peak	any_peak_overlap
IG_128_genes-complement	chr02	62602	63875	chr02	61150	62663	-	divergent	128	sgd	gene	gene_id YBL086C; gene_source sgd; gene_biotype protein_coding;	-1	1274	divergent	TRUE	TRUE	YBL086C		mild_peak	any_peak_overlap
IG_1281_genes-complement	chr04	1238850	1239491	chr04	1238189	1238865	-	divergent	1281	sgd	gene	gene_id YDR381C-A; gene_source sgd; gene_biotype protein_coding;	-1	642	divergent	TRUE	TRUE	YDR381C-A		mild_peak	any_peak_overlap
IG_1281_genes-complement	chr04	1238850	1239491	chr04	1239409	1239962	+	divergent	1281	sgd	gene	gene_id YDR382W; gene_name RPP2B; gene_source sgd; gene_biotype protein_coding;	1	642	divergent	TRUE	TRUE	YDR382W	RPP2B	mild_peak	any_peak_overlap
IG_1283_genes-complement	chr04	1240676	1241203	chr04	1239813	1240699	-	tandemC	1283	sgd	gene	gene_id YDR383C; gene_name NKP1; gene_source sgd; gene_biotype protein_coding;	-1	528	tandem	TRUE	TRUE	YDR383C	NKP1	strong_peak	any_peak_overlap
IG_1284_genes-complement	chr04	1242031	1243229	chr04	1241040	1242131	-	divergent	1284	sgd	gene	gene_id YDR384C; gene_name ATO3; gene_source sgd; gene_biotype protein_coding;	-1	1199	divergent	TRUE	TRUE	YDR384C	ATO3	strong_peak	any_peak_overlap
IG_1284_genes-complement	chr04	1242031	1243229	chr04	1243191	1245906	+	divergent	1284	sgd	gene	gene_id YDR385W; gene_name EFT2; gene_source sgd; gene_biotype protein_coding;	1	1199	divergent	TRUE	TRUE	YDR385W	EFT2	strong_peak	any_peak_overlap
IG_1285_genes-complement	chr04	1245758	1246083	chr04	1246064	1248082	+	tandemW	1285	sgd	gene	gene_id YDR386W; gene_name MUS81; gene_source sgd; gene_biotype protein_coding;	1	326	tandem	TRUE	TRUE	YDR386W	MUS81	no_peak_overlap	no_peak_overlap
IG_1287_genes-complement	chr04	1249821	1250185	chr04	1247997	1249939	-	divergent	1287	sgd	gene	gene_id YDR387C; gene_name CIN10; gene_source sgd; gene_biotype protein_coding;	-1	365	divergent	TRUE	TRUE	YDR387C	CIN10	no_peak_overlap	no_peak_overlap
IG_1287_genes-complement	chr04	1249821	1250185	chr04	1250147	1251750	+	divergent	1287	sgd	gene	gene_id YDR388W; gene_name RVS167; gene_source sgd; gene_biotype protein_coding;	1	365	divergent	TRUE	TRUE	YDR388W	RVS167	no_peak_overlap	no_peak_overlap
IG_1288_genes-complement	chr04	1251634	1252536	chr04	1252480	1254715	+	tandemW	1288	sgd	gene	gene_id YDR389W; gene_name SAC7; gene_source sgd; gene_biotype protein_coding;	1	903	tandem	TRUE	TRUE	YDR389W	SAC7	no_peak_overlap	no_peak_overlap
IG_1290_genes-complement	chr04	1256847	1257357	chr04	1254854	1256880	-	tandemC	1290	sgd	gene	gene_id YDR390C; gene_name UBA2; gene_source sgd; gene_biotype protein_coding;	-1	511	tandem	TRUE	TRUE	YDR390C	UBA2	mild_peak	any_peak_overlap
IG_1291_genes-complement	chr04	1258056	1258695	chr04	1257265	1258068	-	divergent	1291	sgd	gene	gene_id YDR391C; gene_source sgd; gene_biotype protein_coding;	-1	640	divergent	TRUE	TRUE	YDR391C		no_peak_overlap	no_peak_overlap
IG_1291_genes-complement	chr04	1258056	1258695	chr04	1258644	1259841	+	divergent	1291	sgd	gene	gene_id YDR392W; gene_name SPT3; gene_source sgd; gene_biotype protein_coding;	1	640	divergent	TRUE	TRUE	YDR392W	SPT3	no_peak_overlap	no_peak_overlap
IG_1292_genes-complement	chr04	1259709	1259900	chr04	1259853	1261427	+	tandemW	1292	sgd	gene	gene_id YDR393W; gene_name SHE9; gene_source sgd; gene_biotype protein_coding;	1	192	tandem	TRUE	TRUE	YDR393W	SHE9	no_peak_overlap	no_peak_overlap
IG_1293_genes-complement	chr04	1261271	1261680	chr04	1261595	1263047	+	tandemW	1293	sgd	gene	gene_id YDR394W; gene_name RPT3; gene_source sgd; gene_biotype protein_coding;	1	410	tandem	TRUE	TRUE	YDR394W	RPT3	no_peak_overlap	no_peak_overlap
IG_1294_genes-complement	chr04	1262967	1263323	chr04	1263211	1266260	+	tandemW	1294	sgd	gene	gene_id YDR395W; gene_name SXM1; gene_source sgd; gene_biotype protein_coding;	1	357	tandem	TRUE	TRUE	YDR395W	SXM1	mild_peak	any_peak_overlap
IG_1295_genes-complement	chr04	1266158	1266294	chr04	1266199	1267007	+	tandemW	1295	sgd	gene	gene_id YDR396W; gene_source sgd; gene_biotype protein_coding;	1	137	tandem	TRUE	TRUE	YDR396W		no_peak_overlap	no_peak_overlap
IG_1296_genes-complement	chr04	1266898	1267470	chr04	1266205	1266957	-	divergent	1296	sgd	gene	gene_id YDR397C; gene_name NCB2; gene_source sgd; gene_biotype protein_coding;	-1	573	divergent	TRUE	TRUE	YDR397C	NCB2	mild_peak	any_peak_overlap
IG_1296_genes-complement	chr04	1266898	1267470	chr04	1267413	1269496	+	divergent	1296	sgd	gene	gene_id YDR398W; gene_name UTP5; gene_source sgd; gene_biotype protein_coding;	1	573	divergent	TRUE	TRUE	YDR398W	UTP5	mild_peak	any_peak_overlap
IG_1297_genes-complement	chr04	1269402	1270067	chr04	1270009	1270839	+	tandemW	1297	sgd	gene	gene_id YDR399W; gene_name HPT1; gene_source sgd; gene_biotype protein_coding;	1	666	tandem	TRUE	TRUE	YDR399W	HPT1	mild_peak	any_peak_overlap
IG_1298_genes-complement	chr04	1270733	1271062	chr04	1271018	1272244	+	tandemW	1298	sgd	gene	gene_id YDR400W; gene_name URH1; gene_source sgd; gene_biotype protein_coding;	1	330	tandem	TRUE	TRUE	YDR400W	URH1	no_peak_overlap	no_peak_overlap
IG_1299_genes-complement	chr04	1272085	1272222	chr04	1272168	1272956	+	tandemW	1299	sgd	gene	gene_id YDR401W; gene_source sgd; gene_biotype protein_coding;	1	138	tandem	TRUE	TRUE	YDR401W		no_peak_overlap	no_peak_overlap
IG_13_genes-complement	chr01	32940	33447	chr01	33360	34864	+	tandemW	13	sgd	gene	gene_id YAL061W; gene_name BDH2; gene_source sgd; gene_biotype protein_coding;	1	508	tandem	TRUE	TRUE	YAL061W	BDH2	strong_peak	any_peak_overlap
IG_130_genes-complement	chr02	69445	69712	chr02	67021	69540	-	tandemC	130	sgd	gene	gene_id YBL084C; gene_name CDC27; gene_source sgd; gene_biotype protein_coding;	-1	268	tandem	TRUE	TRUE	YBL084C	CDC27	no_peak_overlap	no_peak_overlap
IG_1300_genes-complement	chr04	1273703	1274601	chr04	1272137	1273789	-	divergent	1300	sgd	gene	gene_id YDR402C; gene_name DIT2; gene_source sgd; gene_biotype protein_coding;	-1	899	divergent	TRUE	TRUE	YDR402C	DIT2	no_peak_overlap	no_peak_overlap
IG_1300_genes-complement	chr04	1273703	1274601	chr04	1274543	1276342	+	divergent	1300	sgd	gene	gene_id YDR403W; gene_name DIT1; gene_source sgd; gene_biotype protein_coding;	1	899	divergent	TRUE	TRUE	YDR403W	DIT1	no_peak_overlap	no_peak_overlap
IG_1302_genes-complement	chr04	1277169	1277645	chr04	1277594	1278552	+	divergent	1302	sgd	gene	gene_id YDR405W; gene_name MRP20; gene_source sgd; gene_biotype protein_coding;	1	477	divergent	TRUE	TRUE	YDR405W	MRP20	mild_peak	any_peak_overlap
IG_1302_genes-complement	chr04	1277169	1277645	chr04	1276491	1277286	-	divergent	1302	sgd	gene	gene_id YDR404C; gene_name RPB7; gene_source sgd; gene_biotype protein_coding;	-1	477	divergent	TRUE	TRUE	YDR404C	RPB7	mild_peak	any_peak_overlap
IG_1303_genes-complement	chr04	1278437	1279209	chr04	1279148	1283911	+	tandemW	1303	sgd	gene	gene_id YDR406W; gene_name PDR15; gene_source sgd; gene_biotype protein_coding;	1	773	tandem	TRUE	TRUE	YDR406W	PDR15	mild_peak	any_peak_overlap
IG_1305_genes-complement	chr04	1287938	1288214	chr04	1283992	1288023	-	tandemC	1305	sgd	gene	gene_id YDR407C; gene_name TRS120; gene_source sgd; gene_biotype protein_coding;	-1	277	tandem	TRUE	TRUE	YDR407C	TRS120	no_peak_overlap	no_peak_overlap
IG_1306_genes-complement	chr04	1288859	1289405	chr04	1288070	1288913	-	divergent	1306	sgd	gene	gene_id YDR408C; gene_name ADE8; gene_source sgd; gene_biotype protein_coding;	-1	547	divergent	TRUE	TRUE	YDR408C	ADE8	no_peak_overlap	no_peak_overlap
IG_1306_genes-complement	chr04	1288859	1289405	chr04	1289366	1292338	+	divergent	1306	sgd	gene	gene_id YDR409W; gene_name SIZ1; gene_source sgd; gene_biotype protein_coding;	1	547	divergent	TRUE	TRUE	YDR409W	SIZ1	no_peak_overlap	no_peak_overlap
IG_1308_genes-complement	chr04	1293091	1293368	chr04	1292286	1293153	-	tandemC	1308	sgd	gene	gene_id YDR410C; gene_name STE14; gene_source sgd; gene_biotype protein_coding;	-1	278	tandem	TRUE	TRUE	YDR410C	STE14	mild_peak	any_peak_overlap
IG_1309_genes-complement	chr04	1294394	1294692	chr04	1293298	1294434	-	divergent	1309	sgd	gene	gene_id YDR411C; gene_name DFM1; gene_source sgd; gene_biotype protein_coding;	-1	299	divergent	TRUE	TRUE	YDR411C	DFM1	no_peak_overlap	no_peak_overlap
IG_1309_genes-complement	chr04	1294394	1294692	chr04	1294648	1295541	+	divergent	1309	sgd	gene	gene_id YDR412W; gene_name RRP17; gene_source sgd; gene_biotype protein_coding;	1	299	divergent	TRUE	TRUE	YDR412W	RRP17	no_peak_overlap	no_peak_overlap
IG_131_genes-complement	chr02	71127	71865	chr02	69664	71165	-	divergent	131	sgd	gene	gene_id YBL082C; gene_name ALG3; gene_source sgd; gene_biotype protein_coding;	-1	739	divergent	TRUE	TRUE	YBL082C	ALG3	no_peak_overlap	no_peak_overlap
IG_131_genes-complement	chr02	71127	71865	chr02	71821	73075	+	divergent	131	sgd	gene	gene_id YBL081W; gene_source sgd; gene_biotype protein_coding;	1	739	divergent	TRUE	TRUE	YBL081W		no_peak_overlap	no_peak_overlap
IG_1310_genes-complement	chr04	1295411	1295597	chr04	1294636	1295458	-	tandemC	1310	sgd	gene	gene_id YDR413C; gene_source sgd; gene_biotype protein_coding;	-1	187	tandem	TRUE	TRUE	YDR413C		no_peak_overlap	no_peak_overlap
IG_1311_genes-complement	chr04	1296686	1297036	chr04	1295442	1296784	-	tandemC	1311	sgd	gene	gene_id YDR414C; gene_name ERD1; gene_source sgd; gene_biotype protein_coding;	-1	351	tandem	TRUE	TRUE	YDR414C	ERD1	no_peak_overlap	no_peak_overlap
IG_1312_genes-complement	chr04	1298161	1298431	chr04	1296941	1298196	-	divergent	1312	sgd	gene	gene_id YDR415C; gene_source sgd; gene_biotype protein_coding;	-1	271	divergent	TRUE	TRUE	YDR415C		no_peak_overlap	no_peak_overlap
IG_1312_genes-complement	chr04	1298161	1298431	chr04	1298364	1301040	+	divergent	1312	sgd	gene	gene_id YDR416W; gene_name SYF1; gene_source sgd; gene_biotype protein_coding;	1	271	divergent	TRUE	TRUE	YDR416W	SYF1	no_peak_overlap	no_peak_overlap
IG_1314_genes-complement	chr04	1302113	1303173	chr04	1303174	1305072	+	tandemW	1314	sgd	gene	gene_id YDR419W; gene_name RAD30; gene_source sgd; gene_biotype protein_coding;	1	1061	tandem	FALSE	TRUE	YDR419W	RAD30	no_peak_overlap	no_peak_overlap
IG_1315_genes-complement	chr04	1305072	1306266	chr04	1306208	1311826	+	tandemW	1315	sgd	gene	gene_id YDR420W; gene_name HKR1; gene_source sgd; gene_biotype protein_coding;	1	1195	tandem	TRUE	TRUE	YDR420W	HKR1	mild_peak	any_peak_overlap
IG_1316_genes-complement	chr04	1311675	1312039	chr04	1311963	1314989	+	tandemW	1316	sgd	gene	gene_id YDR421W; gene_name ARO80; gene_source sgd; gene_biotype protein_coding;	1	365	tandem	TRUE	TRUE	YDR421W	ARO80	no_peak_overlap	no_peak_overlap
IG_1318_genes-complement	chr04	1317773	1318045	chr04	1315283	1317832	-	tandemC	1318	sgd	gene	gene_id YDR422C; gene_name SIP1; gene_source sgd; gene_biotype protein_coding;	-1	273	tandem	TRUE	TRUE	YDR422C	SIP1	no_peak_overlap	no_peak_overlap
IG_1319_genes-complement	chr04	1319275	1319386	chr04	1317953	1319307	-	tandemC	1319	sgd	gene	gene_id YDR423C; gene_name CAD1; gene_source sgd; gene_biotype protein_coding;	-1	112	tandem	TRUE	TRUE	YDR423C	CAD1	no_peak_overlap	no_peak_overlap
IG_1320_genes-complement	chr04	1319841	1320063	chr04	1319334	1319878	-	divergent	1320	sgd	gene	gene_id YDR424C; gene_name DYN2; gene_source sgd; gene_biotype protein_coding;	-1	223	divergent	TRUE	TRUE	YDR424C	DYN2	no_peak_overlap	no_peak_overlap
IG_1320_genes-complement	chr04	1319841	1320063	chr04	1320004	1322038	+	divergent	1320	sgd	gene	gene_id YDR425W; gene_name SNX41; gene_source sgd; gene_biotype protein_coding;	1	223	divergent	TRUE	TRUE	YDR425W	SNX41	no_peak_overlap	no_peak_overlap
IG_1321_genes-complement	chr04	1322006	1322204	chr04	1321559	1322112	-	divergent	1321	sgd	gene	gene_id YDR426C; gene_source sgd; gene_biotype protein_coding;	-1	199	divergent	TRUE	TRUE	YDR426C		no_peak_overlap	no_peak_overlap
IG_1321_genes-complement	chr04	1322006	1322204	chr04	1322170	1323467	+	divergent	1321	sgd	gene	gene_id YDR427W; gene_name RPN9; gene_source sgd; gene_biotype protein_coding;	1	199	divergent	TRUE	TRUE	YDR427W	RPN9	no_peak_overlap	no_peak_overlap
IG_1323_genes-complement	chr04	1324239	1324476	chr04	1323349	1324266	-	tandemC	1323	sgd	gene	gene_id YDR428C; gene_name BNA7; gene_source sgd; gene_biotype protein_coding;	-1	238	tandem	TRUE	TRUE	YDR428C	BNA7	no_peak_overlap	no_peak_overlap
IG_1324_genes-complement	chr04	1325301	1325500	chr04	1324348	1325322	-	tandemC	1324	sgd	gene	gene_id YDR429C; gene_name TIF35; gene_source sgd; gene_biotype protein_coding;	-1	200	tandem	TRUE	TRUE	YDR429C	TIF35	no_peak_overlap	no_peak_overlap
IG_1325_genes-complement	chr04	1328701	1328782	chr04	1328755	1330241	+	tandemW	1325	sgd	gene	gene_id YDR432W; gene_name NPL3; gene_source sgd; gene_biotype protein_coding;	1	82	tandem	TRUE	TRUE	YDR432W	NPL3	mild_peak	any_peak_overlap
IG_1326_genes-complement	chr04	1330040	1331236	chr04	1331135	1332946	+	tandemW	1326	sgd	gene	gene_id YDR434W; gene_name GPI17; gene_source sgd; gene_biotype protein_coding;	1	1197	tandem	TRUE	TRUE	YDR434W	GPI17	mild_peak	any_peak_overlap
IG_1328_genes-complement	chr04	1333969	1334820	chr04	1334729	1337104	+	divergent	1328	sgd	gene	gene_id YDR436W; gene_name PPZ2; gene_source sgd; gene_biotype protein_coding;	1	852	divergent	TRUE	TRUE	YDR436W	PPZ2	mild_peak	any_peak_overlap
IG_1328_genes-complement	chr04	1333969	1334820	chr04	1332826	1333987	-	divergent	1328	sgd	gene	gene_id YDR435C; gene_name PPM1; gene_source sgd; gene_biotype protein_coding;	-1	852	divergent	TRUE	TRUE	YDR435C	PPM1	mild_peak	any_peak_overlap
IG_1329_genes-complement	chr04	1336953	1337351	chr04	1337352	1337774	+	tandemW	1329	sgd	gene	gene_id YDR437W; gene_name GPI19; gene_source sgd; gene_biotype protein_coding;	1	399	tandem	FALSE	TRUE	YDR437W	GPI19	no_peak_overlap	no_peak_overlap
IG_133_genes-complement	chr02	74695	75258	chr02	72972	74730	-	divergent	133	sgd	gene	gene_id YBL080C; gene_name PET112; gene_source sgd; gene_biotype protein_coding;	-1	564	divergent	TRUE	TRUE	YBL080C	PET112	mild_peak	any_peak_overlap
IG_133_genes-complement	chr02	74695	75258	chr02	75184	79855	+	divergent	133	sgd	gene	gene_id YBL079W; gene_name NUP170; gene_source sgd; gene_biotype protein_coding;	1	564	divergent	TRUE	TRUE	YBL079W	NUP170	mild_peak	any_peak_overlap
IG_1330_genes-complement	chr04	1337774	1338273	chr04	1338206	1339471	+	tandemW	1330	sgd	gene	gene_id YDR438W; gene_name THI74; gene_source sgd; gene_biotype protein_coding;	1	500	tandem	TRUE	TRUE	YDR438W	THI74	no_peak_overlap	no_peak_overlap
IG_1331_genes-complement	chr04	1339386	1339675	chr04	1339600	1340846	+	tandemW	1331	sgd	gene	gene_id YDR439W; gene_name LRS4; gene_source sgd; gene_biotype protein_coding;	1	290	tandem	TRUE	TRUE	YDR439W	LRS4	no_peak_overlap	no_peak_overlap
IG_1332_genes-complement	chr04	1340719	1342492	chr04	1342412	1344325	+	tandemW	1332	sgd	gene	gene_id YDR440W; gene_name DOT1; gene_source sgd; gene_biotype protein_coding;	1	1774	tandem	TRUE	TRUE	YDR440W	DOT1	no_peak_overlap	no_peak_overlap
IG_1334_genes-complement	chr04	1345062	1345646	chr04	1345647	1346039	+	divergent	1334	sgd	gene	gene_id YDR442W; gene_source sgd; gene_biotype protein_coding;	1	585	divergent	FALSE	TRUE	YDR442W		strong_peak	any_peak_overlap
IG_1334_genes-complement	chr04	1345062	1345646	chr04	1344365	1345198	-	divergent	1334	sgd	gene	gene_id YDR441C; gene_name APT2; gene_source sgd; gene_biotype protein_coding;	-1	585	divergent	TRUE	TRUE	YDR441C	APT2	strong_peak	any_peak_overlap
IG_1335_genes-complement	chr04	1349938	1350289	chr04	1345570	1350011	-	divergent	1335	sgd	gene	gene_id YDR443C; gene_name SSN2; gene_source sgd; gene_biotype protein_coding;	-1	352	divergent	TRUE	TRUE	YDR443C	SSN2	no_peak_overlap	no_peak_overlap
IG_1335_genes-complement	chr04	1349938	1350289	chr04	1350203	1352394	+	divergent	1335	sgd	gene	gene_id YDR444W; gene_source sgd; gene_biotype protein_coding;	1	352	divergent	TRUE	TRUE	YDR444W		no_peak_overlap	no_peak_overlap
IG_1336_genes-complement	chr04	1352589	1353724	chr04	1352182	1352589	-	divergent	1336	sgd	gene	gene_id YDR445C; gene_source sgd; gene_biotype protein_coding;	-1	1136	divergent	FALSE	TRUE	YDR445C		no_peak_overlap	no_peak_overlap
IG_1336_genes-complement	chr04	1352589	1353724	chr04	1353676	1354834	+	divergent	1336	sgd	gene	gene_id YDR446W; gene_name ECM11; gene_source sgd; gene_biotype protein_coding;	1	1136	divergent	TRUE	TRUE	YDR446W	ECM11	no_peak_overlap	no_peak_overlap
IG_1338_genes-complement	chr04	1355553	1356064	chr04	1356011	1357585	+	divergent	1338	sgd	gene	gene_id YDR448W; gene_name ADA2; gene_source sgd; gene_biotype protein_coding;	1	512	divergent	TRUE	TRUE	YDR448W	ADA2	mild_peak	any_peak_overlap
IG_1338_genes-complement	chr04	1355553	1356064	chr04	1354686	1355585	-	divergent	1338	sgd	gene	gene_id YDR447C; gene_name RPS17B; gene_source sgd; gene_biotype protein_coding;	-1	512	divergent	TRUE	TRUE	YDR447C	RPS17B	mild_peak	any_peak_overlap
IG_1340_genes-complement	chr04	1358902	1359922	chr04	1359897	1360905	+	divergent	1340	sgd	gene	gene_id YDR450W; gene_name RPS18A; gene_source sgd; gene_biotype protein_coding;	1	1021	divergent	TRUE	TRUE	YDR450W	RPS18A	strong_peak	any_peak_overlap
IG_1340_genes-complement	chr04	1358902	1359922	chr04	1357486	1358937	-	divergent	1340	sgd	gene	gene_id YDR449C; gene_name UTP6; gene_source sgd; gene_biotype protein_coding;	-1	1021	divergent	TRUE	TRUE	YDR449C	UTP6	strong_peak	any_peak_overlap
IG_1342_genes-complement	chr04	1362181	1362877	chr04	1362741	1365023	+	divergent	1342	sgd	gene	gene_id YDR452W; gene_name PPN1; gene_source sgd; gene_biotype protein_coding;	1	697	divergent	TRUE	TRUE	YDR452W	PPN1	mild_peak	any_peak_overlap
IG_1342_genes-complement	chr04	1362181	1362877	chr04	1360931	1362234	-	divergent	1342	sgd	gene	gene_id YDR451C; gene_name YHP1; gene_source sgd; gene_biotype protein_coding;	-1	697	divergent	TRUE	TRUE	YDR451C	YHP1	mild_peak	any_peak_overlap
IG_1344_genes-complement	chr04	1365662	1366263	chr04	1364961	1365733	-	tandemC	1344	sgd	gene	gene_id YDR453C; gene_name TSA2; gene_source sgd; gene_biotype protein_coding;	-1	602	tandem	TRUE	TRUE	YDR453C	TSA2	no_peak_overlap	no_peak_overlap
IG_1345_genes-complement	chr04	1366827	1367372	chr04	1366153	1366853	-	tandemC	1345	sgd	gene	gene_id YDR454C; gene_name GUK1; gene_source sgd; gene_biotype protein_coding;	-1	546	tandem	TRUE	TRUE	YDR454C	GUK1	no_peak_overlap	no_peak_overlap
IG_1346_genes-complement	chr04	1369386	1369789	chr04	1369675	1379674	+	tandemW	1346	sgd	gene	gene_id YDR457W; gene_name TOM1; gene_source sgd; gene_biotype protein_coding;	1	404	tandem	TRUE	TRUE	YDR457W	TOM1	no_peak_overlap	no_peak_overlap
IG_1348_genes-complement	chr04	1382046	1382318	chr04	1379887	1382082	-	tandemC	1348	sgd	gene	gene_id YDR458C; gene_name HEH2; gene_source sgd; gene_biotype protein_coding;	-1	273	tandem	TRUE	TRUE	YDR458C	HEH2	no_peak_overlap	no_peak_overlap
IG_1349_genes-complement	chr04	1383443	1383810	chr04	1382190	1383533	-	divergent	1349	sgd	gene	gene_id YDR459C; gene_name PFA5; gene_source sgd; gene_biotype protein_coding;	-1	368	divergent	TRUE	TRUE	YDR459C	PFA5	no_peak_overlap	no_peak_overlap
IG_1349_genes-complement	chr04	1383443	1383810	chr04	1383682	1384884	+	divergent	1349	sgd	gene	gene_id YDR460W; gene_name TFB3; gene_source sgd; gene_biotype protein_coding;	1	368	divergent	TRUE	TRUE	YDR460W	TFB3	no_peak_overlap	no_peak_overlap
IG_135_genes-complement	chr02	80731	80896	chr02	80897	81328	+	divergent	135	sgd	gene	gene_id YBL077W; gene_source sgd; gene_biotype protein_coding;	1	166	divergent	FALSE	TRUE	YBL077W		mild_peak	any_peak_overlap
IG_135_genes-complement	chr02	80731	80896	chr02	80244	80762	-	divergent	135	sgd	gene	gene_id YBL078C; gene_name ATG8; gene_source sgd; gene_biotype protein_coding;	-1	166	divergent	TRUE	TRUE	YBL078C	ATG8	mild_peak	any_peak_overlap
IG_1350_genes-complement	chr04	1384776	1385175	chr04	1385113	1385421	+	tandemW	1350	sgd	gene	gene_id YDR461W; gene_name MFA1; gene_source sgd; gene_biotype protein_coding;	1	400	tandem	TRUE	TRUE	YDR461W	MFA1	strong_peak	any_peak_overlap
IG_1352_genes-complement	chr04	1385766	1386072	chr04	1386028	1386636	+	divergent	1352	sgd	gene	gene_id YDR462W; gene_name MRPL28; gene_source sgd; gene_biotype protein_coding;	1	307	divergent	TRUE	TRUE	YDR462W	MRPL28	strong_peak	any_peak_overlap
IG_1352_genes-complement	chr04	1385766	1386072	chr04	1385356	1385790	-	divergent	1352	sgd	gene	gene_id YDR461C-A; gene_source sgd; gene_biotype protein_coding;	-1	307	divergent	TRUE	TRUE	YDR461C-A		strong_peak	any_peak_overlap
IG_1353_genes-complement	chr04	1386516	1386815	chr04	1386776	1388565	+	tandemW	1353	sgd	gene	gene_id YDR463W; gene_name STP1; gene_source sgd; gene_biotype protein_coding;	1	300	tandem	TRUE	TRUE	YDR463W	STP1	strong_peak	any_peak_overlap
IG_1354_genes-complement	chr04	1388375	1388871	chr04	1388760	1393331	+	tandemW	1354	sgd	gene	gene_id YDR464W; gene_name SPP41; gene_source sgd; gene_biotype protein_coding;	1	497	tandem	TRUE	TRUE	YDR464W	SPP41	strong_peak	any_peak_overlap
IG_1356_genes-complement	chr04	1394574	1395120	chr04	1393173	1394615	-	divergent	1356	sgd	gene	gene_id YDR465C; gene_name RMT2; gene_source sgd; gene_biotype protein_coding;	-1	547	divergent	TRUE	TRUE	YDR465C	RMT2	no_peak_overlap	no_peak_overlap
IG_1356_genes-complement	chr04	1394574	1395120	chr04	1395028	1397994	+	divergent	1356	sgd	gene	gene_id YDR466W; gene_name PKH3; gene_source sgd; gene_biotype protein_coding;	1	547	divergent	TRUE	TRUE	YDR466W	PKH3	no_peak_overlap	no_peak_overlap
IG_1357_genes-complement	chr04	1397909	1398025	chr04	1397400	1397978	-	tandemC	1357	sgd	gene	gene_id YDR467C; gene_source sgd; gene_biotype protein_coding;	-1	117	tandem	TRUE	TRUE	YDR467C		no_peak_overlap	no_peak_overlap
IG_1358_genes-complement	chr04	1398700	1399014	chr04	1397898	1398792	-	divergent	1358	sgd	gene	gene_id YDR468C; gene_name TLG1; gene_source sgd; gene_biotype protein_coding;	-1	315	divergent	TRUE	TRUE	YDR468C	TLG1	no_peak_overlap	no_peak_overlap
IG_1358_genes-complement	chr04	1398700	1399014	chr04	1398991	1399634	+	divergent	1358	sgd	gene	gene_id YDR469W; gene_name SDC1; gene_source sgd; gene_biotype protein_coding;	1	315	divergent	TRUE	TRUE	YDR469W	SDC1	no_peak_overlap	no_peak_overlap
IG_136_genes-complement	chr02	84261	84498	chr02	80948	84279	-	tandemC	136	sgd	gene	gene_id YBL076C; gene_name ILS1; gene_source sgd; gene_biotype protein_coding;	-1	238	tandem	TRUE	TRUE	YBL076C	ILS1	strong_peak	any_peak_overlap
IG_1360_genes-complement	chr04	1401214	1401769	chr04	1399521	1401299	-	divergent	1360	sgd	gene	gene_id YDR470C; gene_name UGO1; gene_source sgd; gene_biotype protein_coding;	-1	556	divergent	TRUE	TRUE	YDR470C	UGO1	mild_peak	any_peak_overlap
IG_1360_genes-complement	chr04	1401214	1401769	chr04	1401739	1402669	+	divergent	1360	sgd	gene	gene_id YDR471W; gene_name RPL27B; gene_source sgd; gene_biotype protein_coding;	1	556	divergent	TRUE	TRUE	YDR471W	RPL27B	mild_peak	any_peak_overlap
IG_1361_genes-complement	chr04	1402564	1403321	chr04	1403214	1404308	+	tandemW	1361	sgd	gene	gene_id YDR472W; gene_name TRS31; gene_source sgd; gene_biotype protein_coding;	1	758	tandem	TRUE	TRUE	YDR472W	TRS31	mild_peak	any_peak_overlap
IG_1363_genes-complement	chr04	1405854	1407463	chr04	1404279	1405910	-	tandemC	1363	sgd	gene	gene_id YDR473C; gene_name PRP3; gene_source sgd; gene_biotype protein_coding;	-1	1610	tandem	TRUE	TRUE	YDR473C	PRP3	no_peak_overlap	no_peak_overlap
IG_1364_genes-complement	chr04	1410094	1410452	chr04	1407346	1410186	-	tandemC	1364	sgd	gene	gene_id YDR475C; gene_name JIP4; gene_source sgd; gene_biotype protein_coding;	-1	359	tandem	TRUE	TRUE	YDR475C	JIP4	no_peak_overlap	no_peak_overlap
IG_1365_genes-complement	chr04	1411127	1412372	chr04	1410243	1411150	-	divergent	1365	sgd	gene	gene_id YDR476C; gene_source sgd; gene_biotype protein_coding;	-1	1246	divergent	TRUE	TRUE	YDR476C		no_peak_overlap	no_peak_overlap
IG_1365_genes-complement	chr04	1411127	1412372	chr04	1412262	1414404	+	divergent	1365	sgd	gene	gene_id YDR477W; gene_name SNF1; gene_source sgd; gene_biotype protein_coding;	1	1246	divergent	TRUE	TRUE	YDR477W	SNF1	no_peak_overlap	no_peak_overlap
IG_1366_genes-complement	chr04	1414274	1414574	chr04	1414544	1415258	+	tandemW	1366	sgd	gene	gene_id YDR478W; gene_name SNM1; gene_source sgd; gene_biotype protein_coding;	1	301	tandem	TRUE	TRUE	YDR478W	SNM1	no_peak_overlap	no_peak_overlap
IG_1368_genes-complement	chr04	1416874	1417398	chr04	1415123	1416912	-	divergent	1368	sgd	gene	gene_id YDR479C; gene_name PEX29; gene_source sgd; gene_biotype protein_coding;	-1	525	divergent	TRUE	TRUE	YDR479C	PEX29	no_peak_overlap	no_peak_overlap
IG_1368_genes-complement	chr04	1416874	1417398	chr04	1417343	1418516	+	divergent	1368	sgd	gene	gene_id YDR480W; gene_name DIG2; gene_source sgd; gene_biotype protein_coding;	1	525	divergent	TRUE	TRUE	YDR480W	DIG2	no_peak_overlap	no_peak_overlap
IG_137_genes-complement	chr02	86448	86721	chr02	84423	86465	-	tandemC	137	sgd	gene	gene_id YBL075C; gene_name SSA3; gene_source sgd; gene_biotype protein_coding;	-1	274	tandem	TRUE	TRUE	YBL075C	SSA3	strong_peak	any_peak_overlap
IG_1370_genes-complement	chr04	1420250	1420430	chr04	1418434	1420296	-	tandemC	1370	sgd	gene	gene_id YDR481C; gene_name PHO8; gene_source sgd; gene_biotype protein_coding;	-1	181	tandem	TRUE	TRUE	YDR481C	PHO8	mild_peak	any_peak_overlap
IG_1371_genes-complement	chr04	1420838	1421156	chr04	1420290	1420889	-	divergent	1371	sgd	gene	gene_id YDR482C; gene_name CWC21; gene_source sgd; gene_biotype protein_coding;	-1	319	divergent	TRUE	TRUE	YDR482C	CWC21	mild_peak	any_peak_overlap
IG_1371_genes-complement	chr04	1420838	1421156	chr04	1421127	1422601	+	divergent	1371	sgd	gene	gene_id YDR483W; gene_name KRE2; gene_source sgd; gene_biotype protein_coding;	1	319	divergent	TRUE	TRUE	YDR483W	KRE2	mild_peak	any_peak_overlap
IG_1372_genes-complement	chr04	1422485	1422762	chr04	1422725	1424780	+	tandemW	1372	sgd	gene	gene_id YDR484W; gene_name VPS52; gene_source sgd; gene_biotype protein_coding;	1	278	tandem	TRUE	TRUE	YDR484W	VPS52	no_peak_overlap	no_peak_overlap
IG_1374_genes-complement	chr04	1427207	1427430	chr04	1424666	1427235	-	tandemC	1374	sgd	gene	gene_id YDR485C; gene_name VPS72; gene_source sgd; gene_biotype protein_coding;	-1	224	tandem	TRUE	TRUE	YDR485C	VPS72	no_peak_overlap	no_peak_overlap
IG_1375_genes-complement	chr04	1428120	1428353	chr04	1427281	1428145	-	tandemC	1375	sgd	gene	gene_id YDR486C; gene_name VPS60; gene_source sgd; gene_biotype protein_coding;	-1	234	tandem	TRUE	TRUE	YDR486C	VPS60	no_peak_overlap	no_peak_overlap
IG_1376_genes-complement	chr04	1428980	1429187	chr04	1428243	1429042	-	tandemC	1376	sgd	gene	gene_id YDR487C; gene_name RIB3; gene_source sgd; gene_biotype protein_coding;	-1	208	tandem	TRUE	TRUE	YDR487C	RIB3	strong_peak	any_peak_overlap
IG_1377_genes-complement	chr04	1430789	1431011	chr04	1429020	1430818	-	divergent	1377	sgd	gene	gene_id YDR488C; gene_name PAC11; gene_source sgd; gene_biotype protein_coding;	-1	223	divergent	TRUE	TRUE	YDR488C	PAC11	no_peak_overlap	no_peak_overlap
IG_1377_genes-complement	chr04	1430789	1431011	chr04	1430995	1431968	+	divergent	1377	sgd	gene	gene_id YDR489W; gene_name SLD5; gene_source sgd; gene_biotype protein_coding;	1	223	divergent	TRUE	TRUE	YDR489W	SLD5	no_peak_overlap	no_peak_overlap
IG_1379_genes-complement	chr04	1434268	1434499	chr04	1431817	1434351	-	tandemC	1379	sgd	gene	gene_id YDR490C; gene_name PKH1; gene_source sgd; gene_biotype protein_coding;	-1	232	tandem	TRUE	TRUE	YDR490C	PKH1	strong_peak	any_peak_overlap
IG_1380_genes-complement	chr04	1435874	1436216	chr04	1436117	1436694	+	tandemW	1380	sgd	gene	gene_id YDR493W; gene_name MZM1; gene_source sgd; gene_biotype protein_coding;	1	343	tandem	TRUE	TRUE	YDR493W	MZM1	no_peak_overlap	no_peak_overlap
IG_1381_genes-complement	chr04	1436588	1436929	chr04	1436899	1438084	+	tandemW	1381	sgd	gene	gene_id YDR494W; gene_name RSM28; gene_source sgd; gene_biotype protein_coding;	1	342	tandem	TRUE	TRUE	YDR494W	RSM28	no_peak_overlap	no_peak_overlap
IG_1383_genes-complement	chr04	1441150	1441432	chr04	1437970	1441203	-	tandemC	1383	sgd	gene	gene_id YDR495C; gene_name VPS3; gene_source sgd; gene_biotype protein_coding;	-1	283	tandem	TRUE	TRUE	YDR495C	VPS3	no_peak_overlap	no_peak_overlap
IG_1384_genes-complement	chr04	1443403	1443712	chr04	1441328	1443432	-	tandemC	1384	sgd	gene	gene_id YDR496C; gene_name PUF6; gene_source sgd; gene_biotype protein_coding;	-1	310	tandem	TRUE	TRUE	YDR496C	PUF6	no_peak_overlap	no_peak_overlap
IG_1385_genes-complement	chr04	1445467	1445842	chr04	1443611	1445539	-	tandemC	1385	sgd	gene	gene_id YDR497C; gene_name ITR1; gene_source sgd; gene_biotype protein_coding;	-1	376	tandem	TRUE	TRUE	YDR497C	ITR1	mild_peak	any_peak_overlap
IG_1386_genes-complement	chr04	1446994	1447829	chr04	1447795	1450215	+	divergent	1386	sgd	gene	gene_id YDR499W; gene_name LCD1; gene_source sgd; gene_biotype protein_coding;	1	836	divergent	TRUE	TRUE	YDR499W	LCD1	mild_peak	any_peak_overlap
IG_1386_genes-complement	chr04	1446994	1447829	chr04	1445774	1447034	-	divergent	1386	sgd	gene	gene_id YDR498C; gene_name SEC20; gene_source sgd; gene_biotype protein_coding;	-1	836	divergent	TRUE	TRUE	YDR498C	SEC20	mild_peak	any_peak_overlap
IG_1388_genes-complement	chr04	1450853	1451352	chr04	1451319	1453102	+	divergent	1388	sgd	gene	gene_id YDR501W; gene_name PLM2; gene_source sgd; gene_biotype protein_coding;	1	500	divergent	TRUE	TRUE	YDR501W	PLM2	strong_peak	any_peak_overlap
IG_1388_genes-complement	chr04	1450853	1451352	chr04	1450099	1450875	-	divergent	1388	sgd	gene	gene_id YDR500C; gene_name RPL37B; gene_source sgd; gene_biotype protein_coding;	-1	500	divergent	TRUE	TRUE	YDR500C	RPL37B	strong_peak	any_peak_overlap
IG_139_genes-complement	chr02	89125	89457	chr02	88409	89474	-	tandemC	139	sgd	gene	gene_id YBL072C; gene_name RPS8A; gene_source sgd; gene_biotype protein_coding;	-1	333	tandem	TRUE	TRUE	YBL072C	RPS8A	no_peak_overlap	no_peak_overlap
IG_1390_genes-complement	chr04	1454464	1455041	chr04	1453121	1454511	-	tandemC	1390	sgd	gene	gene_id YDR502C; gene_name SAM2; gene_source sgd; gene_biotype protein_coding;	-1	578	tandem	TRUE	TRUE	YDR502C	SAM2	no_peak_overlap	no_peak_overlap
IG_1391_genes-complement	chr04	1455866	1456310	chr04	1454851	1455908	-	tandemC	1391	sgd	gene	gene_id YDR503C; gene_name LPP1; gene_source sgd; gene_biotype protein_coding;	-1	445	tandem	TRUE	TRUE	YDR503C	LPP1	mild_peak	any_peak_overlap
IG_1392_genes-complement	chr04	1459220	1459727	chr04	1456547	1459325	-	tandemC	1392	sgd	gene	gene_id YDR505C; gene_name PSP1; gene_source sgd; gene_biotype protein_coding;	-1	508	tandem	TRUE	TRUE	YDR505C	PSP1	strong_peak	any_peak_overlap
IG_1393_genes-complement	chr04	1461554	1462357	chr04	1459728	1461554	-	tandemC	1393	sgd	gene	gene_id YDR506C; gene_name GMC1; gene_source sgd; gene_biotype protein_coding;	-1	804	tandem	FALSE	TRUE	YDR506C	GMC1	mild_peak	any_peak_overlap
IG_1394_genes-complement	chr04	1465786	1466452	chr04	1462173	1465897	-	tandemC	1394	sgd	gene	gene_id YDR507C; gene_name GIN4; gene_source sgd; gene_biotype protein_coding;	-1	667	tandem	TRUE	TRUE	YDR507C	GIN4	mild_peak	any_peak_overlap
IG_1395_genes-complement	chr04	1468573	1469399	chr04	1469346	1469833	+	tandemW	1395	sgd	gene	gene_id YDR510W; gene_name SMT3; gene_source sgd; gene_biotype protein_coding;	1	827	tandem	TRUE	TRUE	YDR510W	SMT3	strong_peak	any_peak_overlap
IG_1396_genes-complement	chr04	1469811	1470016	chr04	1469652	1469886	-	divergent	1396	sgd	gene	gene_id YDR510C-A; gene_source sgd; gene_biotype protein_coding;	-1	206	divergent	TRUE	TRUE	YDR510C-A		no_peak_overlap	no_peak_overlap
IG_1396_genes-complement	chr04	1469811	1470016	chr04	1469984	1470496	+	divergent	1396	sgd	gene	gene_id YDR511W; gene_name SDH7; gene_source sgd; gene_biotype protein_coding;	1	206	divergent	TRUE	TRUE	YDR511W	SDH7	no_peak_overlap	no_peak_overlap
IG_1399_genes-complement	chr04	1472999	1473428	chr04	1471447	1473043	-	divergent	1399	sgd	gene	gene_id YDR514C; gene_source sgd; gene_biotype protein_coding;	-1	430	divergent	TRUE	TRUE	YDR514C		no_peak_overlap	no_peak_overlap
IG_1399_genes-complement	chr04	1472999	1473428	chr04	1473322	1474856	+	divergent	1399	sgd	gene	gene_id YDR515W; gene_name SLF1; gene_source sgd; gene_biotype protein_coding;	1	430	divergent	TRUE	TRUE	YDR515W	SLF1	no_peak_overlap	no_peak_overlap
IG_14_genes-complement	chr01	34701	35154	chr01	35103	36411	+	tandemW	14	sgd	gene	gene_id YAL060W; gene_name BDH1; gene_source sgd; gene_biotype protein_coding;	1	454	tandem	TRUE	TRUE	YAL060W	BDH1	strong_peak	any_peak_overlap
IG_140_genes-complement	chr02	89556	89977	chr02	89941	90469	+	divergent	140	sgd	gene	gene_id YBL071W-A; gene_name KTI11; gene_source sgd; gene_biotype protein_coding;	1	422	divergent	TRUE	TRUE	YBL071W-A	KTI11	mild_peak	any_peak_overlap
IG_140_genes-complement	chr02	89556	89977	chr02	89458	89556	-	divergent	140	sgd	gene	gene_id YBL071C-B; gene_source sgd; gene_biotype protein_coding;	-1	422	divergent	FALSE	TRUE	YBL071C-B		mild_peak	any_peak_overlap
IG_1401_genes-complement	chr04	1476476	1477238	chr04	1474846	1476529	-	divergent	1401	sgd	gene	gene_id YDR516C; gene_name EMI2; gene_source sgd; gene_biotype protein_coding;	-1	763	divergent	TRUE	TRUE	YDR516C	EMI2	mild_peak	any_peak_overlap
IG_1401_genes-complement	chr04	1476476	1477238	chr04	1477159	1478452	+	divergent	1401	sgd	gene	gene_id YDR517W; gene_name GRH1; gene_source sgd; gene_biotype protein_coding;	1	763	divergent	TRUE	TRUE	YDR517W	GRH1	mild_peak	any_peak_overlap
IG_1402_genes-complement	chr04	1478357	1478607	chr04	1478575	1480207	+	tandemW	1402	sgd	gene	gene_id YDR518W; gene_name EUG1; gene_source sgd; gene_biotype protein_coding;	1	251	tandem	TRUE	TRUE	YDR518W	EUG1	mild_peak	any_peak_overlap
IG_1403_genes-complement	chr04	1480161	1480424	chr04	1480384	1481034	+	tandemW	1403	sgd	gene	gene_id YDR519W; gene_name FPR2; gene_source sgd; gene_biotype protein_coding;	1	264	tandem	TRUE	TRUE	YDR519W	FPR2	no_peak_overlap	no_peak_overlap
IG_1406_genes-complement	chr04	1485303	1485565	chr04	1483732	1485353	-	tandemC	1406	sgd	gene	gene_id YDR522C; gene_name SPS2; gene_source sgd; gene_biotype protein_coding;	-1	263	tandem	TRUE	TRUE	YDR522C	SPS2	no_peak_overlap	no_peak_overlap
IG_1407_genes-complement	chr04	1487038	1487541	chr04	1485434	1487107	-	tandemC	1407	sgd	gene	gene_id YDR523C; gene_name SPS1; gene_source sgd; gene_biotype protein_coding;	-1	504	tandem	TRUE	TRUE	YDR523C	SPS1	no_peak_overlap	no_peak_overlap
IG_1408_genes-complement	chr04	1488990	1489402	chr04	1489346	1489524	+	divergent	1408	sgd	gene	gene_id YDR524W-C; gene_source sgd; gene_biotype protein_coding;	1	413	divergent	TRUE	TRUE	YDR524W-C		strong_peak	any_peak_overlap
IG_1408_genes-complement	chr04	1488990	1489402	chr04	1487485	1489058	-	divergent	1408	sgd	gene	gene_id YDR524C; gene_name AGE1; gene_source sgd; gene_biotype protein_coding;	-1	413	divergent	TRUE	TRUE	YDR524C	AGE1	strong_peak	any_peak_overlap
IG_141_genes-complement	chr02	90531	90604	chr02	90107	90672	-	tandemC	141	sgd	gene	gene_id YBL071C; gene_source sgd; gene_biotype protein_coding;	-1	74	tandem	TRUE	TRUE	YBL071C		no_peak_overlap	no_peak_overlap
IG_1410_genes-complement	chr04	1489798	1489870	chr04	1489483	1489839	-	tandemC	1410	sgd	gene	gene_id YDR524C-B; gene_source sgd; gene_biotype protein_coding;	-1	73	tandem	TRUE	TRUE	YDR524C-B		strong_peak	any_peak_overlap
IG_1411_genes-complement	chr04	1490234	1490595	chr04	1490542	1491048	+	tandemW	1411	sgd	gene	gene_id YDR525W-A; gene_name SNA2; gene_source sgd; gene_biotype protein_coding;	1	362	tandem	TRUE	TRUE	YDR525W-A	SNA2	strong_peak	any_peak_overlap
IG_1413_genes-complement	chr04	1492413	1494585	chr04	1494474	1495984	+	tandemW	1413	sgd	gene	gene_id YDR528W; gene_name HLR1; gene_source sgd; gene_biotype protein_coding;	1	2173	tandem	TRUE	TRUE	YDR528W	HLR1	strong_peak	any_peak_overlap
IG_1413_genes-complement	chr04	1492413	1494585	chr04	1494474	1495984	+	tandemW	1413	sgd	gene	gene_id YDR528W; gene_name HLR1; gene_source sgd; gene_biotype protein_coding;	1	2173	tandem	TRUE	TRUE	YDR528W	HLR1	mild_peak	any_peak_overlap
IG_1415_genes-complement	chr04	1496548	1496790	chr04	1495959	1496578	-	tandemC	1415	sgd	gene	gene_id YDR529C; gene_name QCR7; gene_source sgd; gene_biotype protein_coding;	-1	243	tandem	TRUE	TRUE	YDR529C	QCR7	mild_peak	any_peak_overlap
IG_1416_genes-complement	chr04	1497768	1498231	chr04	1496645	1497846	-	divergent	1416	sgd	gene	gene_id YDR530C; gene_name APA2; gene_source sgd; gene_biotype protein_coding;	-1	464	divergent	TRUE	TRUE	YDR530C	APA2	no_peak_overlap	no_peak_overlap
IG_1416_genes-complement	chr04	1497768	1498231	chr04	1498174	1499410	+	divergent	1416	sgd	gene	gene_id YDR531W; gene_name CAB1; gene_source sgd; gene_biotype protein_coding;	1	464	divergent	TRUE	TRUE	YDR531W	CAB1	no_peak_overlap	no_peak_overlap
IG_1418_genes-complement	chr04	1500553	1501446	chr04	1499325	1500586	-	tandemC	1418	sgd	gene	gene_id YDR532C; gene_name KRE28; gene_source sgd; gene_biotype protein_coding;	-1	894	tandem	TRUE	TRUE	YDR532C	KRE28	no_peak_overlap	no_peak_overlap
IG_1419_genes-complement	chr04	1502160	1503313	chr04	1501312	1502214	-	tandemC	1419	sgd	gene	gene_id YDR533C; gene_name HSP31; gene_source sgd; gene_biotype protein_coding;	-1	1154	tandem	TRUE	TRUE	YDR533C	HSP31	strong_peak	any_peak_overlap
IG_1420_genes-complement	chr04	1504900	1506605	chr04	1503091	1505003	-	tandemC	1420	sgd	gene	gene_id YDR534C; gene_name FIT1; gene_source sgd; gene_biotype protein_coding;	-1	1706	tandem	TRUE	TRUE	YDR534C	FIT1	no_peak_overlap	no_peak_overlap
IG_1421_genes-complement	chr04	1507362	1508004	chr04	1506606	1507362	-	divergent	1421	sgd	gene	gene_id YDR535C; gene_source sgd; gene_biotype protein_coding;	-1	643	divergent	FALSE	TRUE	YDR535C		strong_peak	any_peak_overlap
IG_1421_genes-complement	chr04	1507362	1508004	chr04	1507953	1509850	+	divergent	1421	sgd	gene	gene_id YDR536W; gene_name STL1; gene_source sgd; gene_biotype protein_coding;	1	643	divergent	TRUE	TRUE	YDR536W	STL1	strong_peak	any_peak_overlap
IG_1423_genes-complement	chr04	1511630	1512093	chr04	1512054	1513672	+	tandemW	1423	sgd	gene	gene_id YDR539W; gene_name FDC1; gene_source sgd; gene_biotype protein_coding;	1	464	tandem	TRUE	TRUE	YDR539W	FDC1	no_peak_overlap	no_peak_overlap
IG_1425_genes-complement	chr04	1517675	1519663	chr04	1516930	1517772	-	tandemC	1425	sgd	gene	gene_id YDR540C; gene_name IRC4; gene_source sgd; gene_biotype protein_coding;	-1	1989	tandem	TRUE	TRUE	YDR540C	IRC4	no_peak_overlap	no_peak_overlap
IG_1426_genes-complement	chr04	1520698	1523248	chr04	1519457	1520775	-	divergent	1426	sgd	gene	gene_id YDR541C; gene_source sgd; gene_biotype protein_coding;	-1	2551	divergent	TRUE	TRUE	YDR541C		no_peak_overlap	no_peak_overlap
IG_1426_genes-complement	chr04	1520698	1523248	chr04	1523197	1523742	+	divergent	1426	sgd	gene	gene_id YDR542W; gene_name PAU10; gene_source sgd; gene_biotype protein_coding;	1	2551	divergent	TRUE	TRUE	YDR542W	PAU10	no_peak_overlap	no_peak_overlap
IG_1428_genes-complement	chr04	1524933	1525094	chr04	1524634	1524933	-	tandemC	1428	sgd	gene	gene_id YDR543C; gene_source sgd; gene_biotype protein_coding;	-1	162	tandem	FALSE	TRUE	YDR543C		no_peak_overlap	no_peak_overlap
IG_1429_genes-complement	chr04	1525523	1526320	chr04	1525095	1525523	-	divergent	1429	sgd	gene	gene_id YDR544C; gene_source sgd; gene_biotype protein_coding;	-1	798	divergent	FALSE	TRUE	YDR544C		strong_peak	any_peak_overlap
IG_1429_genes-complement	chr04	1525523	1526320	chr04	1526321	1531711	+	divergent	1429	sgd	gene	gene_id YDR545W; gene_name YRF1-1; gene_source sgd; gene_biotype protein_coding;	1	798	divergent	FALSE	TRUE	YDR545W	YRF1-1	strong_peak	any_peak_overlap
IG_1432_genes-complement	chr05	4097	4184	chr05	264	4097	-	tandemC	1432	sgd	gene	gene_id YEL077C; gene_source sgd; gene_biotype protein_coding;	-1	88	tandem	FALSE	TRUE	YEL077C		no_peak_overlap	no_peak_overlap
IG_1433_genes-complement	chr05	5713	6125	chr05	6061	6597	+	divergent	1433	sgd	gene	gene_id YEL074W; gene_source sgd; gene_biotype protein_coding;	1	413	divergent	TRUE	TRUE	YEL074W		strong_peak	any_peak_overlap
IG_1433_genes-complement	chr05	5713	6125	chr05	5345	5713	-	divergent	1433	sgd	gene	gene_id YEL075C; gene_source sgd; gene_biotype protein_coding;	-1	413	divergent	FALSE	TRUE	YEL075C		strong_peak	any_peak_overlap
IG_1435_genes-complement	chr05	7553	13719	chr05	7230	7553	-	divergent	1435	sgd	gene	gene_id YEL073C; gene_source sgd; gene_biotype protein_coding;	-1	6167	divergent	FALSE	TRUE	YEL073C		mild_peak	any_peak_overlap
IG_1435_genes-complement	chr05	7553	13719	chr05	13626	14596	+	divergent	1435	sgd	gene	gene_id YEL072W; gene_name RMD6; gene_source sgd; gene_biotype protein_coding;	1	6167	divergent	TRUE	TRUE	YEL072W	RMD6	mild_peak	any_peak_overlap
IG_1436_genes-complement	chr05	14415	16354	chr05	16327	17954	+	tandemW	1436	sgd	gene	gene_id YEL071W; gene_name DLD3; gene_source sgd; gene_biotype protein_coding;	1	1940	tandem	TRUE	TRUE	YEL071W	DLD3	strong_peak	any_peak_overlap
IG_1437_genes-complement	chr05	17845	19588	chr05	19557	21245	+	tandemW	1437	sgd	gene	gene_id YEL070W; gene_name DSF1; gene_source sgd; gene_biotype protein_coding;	1	1744	tandem	TRUE	TRUE	YEL070W	DSF1	strong_peak	any_peak_overlap
IG_1439_genes-complement	chr05	23231	25645	chr05	21444	23285	-	tandemC	1439	sgd	gene	gene_id YEL069C; gene_name HXT13; gene_source sgd; gene_biotype protein_coding;	-1	2415	tandem	TRUE	TRUE	YEL069C	HXT13	mild_peak	any_peak_overlap
IG_144_genes-complement	chr02	95882	96668	chr02	93507	95972	-	tandemC	144	sgd	gene	gene_id YBL067C; gene_name UBP13; gene_source sgd; gene_biotype protein_coding;	-1	787	tandem	TRUE	TRUE	YBL067C	UBP13	strong_peak	any_peak_overlap
IG_1440_genes-complement	chr05	25978	26188	chr05	25406	25996	-	tandemC	1440	sgd	gene	gene_id YEL068C; gene_source sgd; gene_biotype protein_coding;	-1	211	tandem	TRUE	TRUE	YEL068C		no_peak_overlap	no_peak_overlap
IG_1441_genes-complement	chr05	27206	27656	chr05	27613	29620	+	tandemW	1441	sgd	gene	gene_id YEL065W; gene_name SIT1; gene_source sgd; gene_biotype protein_coding;	1	451	tandem	TRUE	TRUE	YEL065W	SIT1	no_peak_overlap	no_peak_overlap
IG_1443_genes-complement	chr05	31239	31693	chr05	29642	31294	-	tandemC	1443	sgd	gene	gene_id YEL064C; gene_name AVT2; gene_source sgd; gene_biotype protein_coding;	-1	455	tandem	TRUE	TRUE	YEL064C	AVT2	no_peak_overlap	no_peak_overlap
IG_1444_genes-complement	chr05	33466	34406	chr05	34386	36384	+	divergent	1444	sgd	gene	gene_id YEL062W; gene_name NPR2; gene_source sgd; gene_biotype protein_coding;	1	941	divergent	TRUE	TRUE	YEL062W	NPR2	strong_peak	any_peak_overlap
IG_1444_genes-complement	chr05	33466	34406	chr05	31553	33522	-	divergent	1444	sgd	gene	gene_id YEL063C; gene_name CAN1; gene_source sgd; gene_biotype protein_coding;	-1	941	divergent	TRUE	TRUE	YEL063C	CAN1	strong_peak	any_peak_overlap
IG_1446_genes-complement	chr05	39537	40045	chr05	36405	39635	-	tandemC	1446	sgd	gene	gene_id YEL061C; gene_name CIN8; gene_source sgd; gene_biotype protein_coding;	-1	509	tandem	TRUE	TRUE	YEL061C	CIN8	strong_peak	any_peak_overlap
IG_1447_genes-complement	chr05	41953	42399	chr05	39848	42005	-	tandemC	1447	sgd	gene	gene_id YEL060C; gene_name PRB1; gene_source sgd; gene_biotype protein_coding;	-1	447	tandem	TRUE	TRUE	YEL060C	PRB1	strong_peak	any_peak_overlap
IG_1448_genes-complement	chr05	42624	42651	chr05	42652	42960	+	divergent	1448	sgd	gene	gene_id YEL059W; gene_name HHY1; gene_source sgd; gene_biotype protein_coding;	1	28	divergent	FALSE	TRUE	YEL059W	HHY1	strong_peak	any_peak_overlap
IG_1448_genes-complement	chr05	42624	42651	chr05	42336	42681	-	divergent	1448	sgd	gene	gene_id YEL059C-A; gene_name SOM1; gene_source sgd; gene_biotype protein_coding;	-1	28	divergent	TRUE	TRUE	YEL059C-A	SOM1	strong_peak	any_peak_overlap
IG_1449_genes-complement	chr05	42960	43251	chr05	43223	45024	+	tandemW	1449	sgd	gene	gene_id YEL058W; gene_name PCM1; gene_source sgd; gene_biotype protein_coding;	1	292	tandem	TRUE	TRUE	YEL058W	PCM1	strong_peak	any_peak_overlap
IG_1451_genes-complement	chr05	45721	47167	chr05	47118	48481	+	divergent	1451	sgd	gene	gene_id YEL056W; gene_name HAT2; gene_source sgd; gene_biotype protein_coding;	1	1447	divergent	TRUE	TRUE	YEL056W	HAT2	mild_peak	any_peak_overlap
IG_1451_genes-complement	chr05	45721	47167	chr05	44907	45801	-	divergent	1451	sgd	gene	gene_id YEL057C; gene_name SDD1; gene_source sgd; gene_biotype protein_coding;	-1	1447	divergent	TRUE	TRUE	YEL057C	SDD1	mild_peak	any_peak_overlap
IG_1453_genes-complement	chr05	51539	52720	chr05	48342	51595	-	tandemC	1453	sgd	gene	gene_id YEL055C; gene_name POL5; gene_source sgd; gene_biotype protein_coding;	-1	1182	tandem	TRUE	TRUE	YEL055C	POL5	mild_peak	any_peak_overlap
IG_1455_genes-complement	chr05	56102	56570	chr05	53810	56158	-	divergent	1455	sgd	gene	gene_id YEL053C; gene_name MAK10; gene_source sgd; gene_biotype protein_coding;	-1	469	divergent	TRUE	TRUE	YEL053C	MAK10	no_peak_overlap	no_peak_overlap
IG_1455_genes-complement	chr05	56102	56570	chr05	56532	58165	+	divergent	1455	sgd	gene	gene_id YEL052W; gene_name AFG1; gene_source sgd; gene_biotype protein_coding;	1	469	divergent	TRUE	TRUE	YEL052W	AFG1	no_peak_overlap	no_peak_overlap
IG_1456_genes-complement	chr05	58100	58377	chr05	58334	59258	+	tandemW	1456	sgd	gene	gene_id YEL051W; gene_name VMA8; gene_source sgd; gene_biotype protein_coding;	1	278	tandem	TRUE	TRUE	YEL051W	VMA8	no_peak_overlap	no_peak_overlap
IG_1457_genes-complement	chr05	59148	59548	chr05	59549	59740	+	tandemW	1457	sgd	gene	gene_id YEL050W-A; gene_source sgd; gene_biotype protein_coding;	1	401	tandem	FALSE	TRUE	YEL050W-A		no_peak_overlap	no_peak_overlap
IG_1458_genes-complement	chr05	60851	63727	chr05	59513	60899	-	divergent	1458	sgd	gene	gene_id YEL050C; gene_name RML2; gene_source sgd; gene_biotype protein_coding;	-1	2877	divergent	TRUE	TRUE	YEL050C	RML2	mild_peak	any_peak_overlap
IG_1458_genes-complement	chr05	60851	63727	chr05	63676	64243	+	divergent	1458	sgd	gene	gene_id YEL049W; gene_name PAU2; gene_source sgd; gene_biotype protein_coding;	1	2877	divergent	TRUE	TRUE	YEL049W	PAU2	mild_peak	any_peak_overlap
IG_146_genes-complement	chr02	101156	101885	chr02	101862	105343	+	divergent	146	sgd	gene	gene_id YBL063W; gene_name KIP1; gene_source sgd; gene_biotype protein_coding;	1	730	divergent	TRUE	TRUE	YBL063W	KIP1	strong_peak	any_peak_overlap
IG_146_genes-complement	chr02	101156	101885	chr02	100300	101201	-	divergent	146	sgd	gene	gene_id YBL064C; gene_name PRX1; gene_source sgd; gene_biotype protein_coding;	-1	730	divergent	TRUE	TRUE	YBL064C	PRX1	strong_peak	any_peak_overlap
IG_1460_genes-complement	chr05	65167	65384	chr05	64655	65199	-	tandemC	1460	sgd	gene	gene_id YEL048C; gene_name TCA17; gene_source sgd; gene_biotype protein_coding;	-1	218	tandem	TRUE	TRUE	YEL048C	TCA17	no_peak_overlap	no_peak_overlap
IG_1461_genes-complement	chr05	66797	67628	chr05	65308	66814	-	tandemC	1461	sgd	gene	gene_id YEL047C; gene_source sgd; gene_biotype protein_coding;	-1	832	tandem	TRUE	TRUE	YEL047C		no_peak_overlap	no_peak_overlap
IG_1462_genes-complement	chr05	68792	68839	chr05	67490	68892	-	tandemC	1462	sgd	gene	gene_id YEL046C; gene_name GLY1; gene_source sgd; gene_biotype protein_coding;	-1	48	tandem	TRUE	TRUE	YEL046C	GLY1	strong_peak	any_peak_overlap
IG_1463_genes-complement	chr05	69265	69756	chr05	69728	70349	+	divergent	1463	sgd	gene	gene_id YEL044W; gene_name IES6; gene_source sgd; gene_biotype protein_coding;	1	492	divergent	TRUE	TRUE	YEL044W	IES6	strong_peak	any_peak_overlap
IG_1463_genes-complement	chr05	69265	69756	chr05	68840	69265	-	divergent	1463	sgd	gene	gene_id YEL045C; gene_source sgd; gene_biotype protein_coding;	-1	492	divergent	FALSE	TRUE	YEL045C		strong_peak	any_peak_overlap
IG_1464_genes-complement	chr05	70257	70477	chr05	70428	73447	+	tandemW	1464	sgd	gene	gene_id YEL043W; gene_source sgd; gene_biotype protein_coding;	1	221	tandem	TRUE	TRUE	YEL043W		mild_peak	any_peak_overlap
IG_1465_genes-complement	chr05	73348	73770	chr05	73653	75462	+	tandemW	1465	sgd	gene	gene_id YEL042W; gene_name GDA1; gene_source sgd; gene_biotype protein_coding;	1	423	tandem	TRUE	TRUE	YEL042W	GDA1	no_peak_overlap	no_peak_overlap
IG_1466_genes-complement	chr05	75327	75943	chr05	75836	77536	+	tandemW	1466	sgd	gene	gene_id YEL041W; gene_name YEF1; gene_source sgd; gene_biotype protein_coding;	1	617	tandem	TRUE	TRUE	YEL041W	YEF1	no_peak_overlap	no_peak_overlap
IG_1467_genes-complement	chr05	77431	78052	chr05	78035	79593	+	tandemW	1467	sgd	gene	gene_id YEL040W; gene_name UTR2; gene_source sgd; gene_biotype protein_coding;	1	622	tandem	TRUE	TRUE	YEL040W	UTR2	mild_peak	any_peak_overlap
IG_1469_genes-complement	chr05	79977	80461	chr05	80427	81233	+	divergent	1469	sgd	gene	gene_id YEL038W; gene_name UTR4; gene_source sgd; gene_biotype protein_coding;	1	485	divergent	TRUE	TRUE	YEL038W	UTR4	mild_peak	any_peak_overlap
IG_1469_genes-complement	chr05	79977	80461	chr05	79511	80064	-	divergent	1469	sgd	gene	gene_id YEL039C; gene_name CYC7; gene_source sgd; gene_biotype protein_coding;	-1	485	divergent	TRUE	TRUE	YEL039C	CYC7	mild_peak	any_peak_overlap
IG_147_genes-complement	chr02	105221	105307	chr02	105308	105688	+	tandemW	147	sgd	gene	gene_id YBL062W; gene_source sgd; gene_biotype protein_coding;	1	87	tandem	FALSE	TRUE	YBL062W		no_peak_overlap	no_peak_overlap
IG_1471_genes-complement	chr05	82603	83049	chr05	81236	82723	-	tandemC	1471	sgd	gene	gene_id YEL037C; gene_name RAD23; gene_source sgd; gene_biotype protein_coding;	-1	447	tandem	TRUE	TRUE	YEL037C	RAD23	mild_peak	any_peak_overlap
IG_1472_genes-complement	chr05	84552	85044	chr05	82967	84684	-	tandemC	1472	sgd	gene	gene_id YEL036C; gene_name ANP1; gene_source sgd; gene_biotype protein_coding;	-1	493	tandem	TRUE	TRUE	YEL036C	ANP1	strong_peak	any_peak_overlap
IG_1473_genes-complement	chr05	85545	85612	chr05	85045	85545	-	tandemC	1473	sgd	gene	gene_id YEL035C; gene_name UTR5; gene_source sgd; gene_biotype protein_coding;	-1	68	tandem	FALSE	TRUE	YEL035C	UTR5	strong_peak	any_peak_overlap
IG_1474_genes-complement	chr05	86598	86936	chr05	86895	90006	+	tandemW	1474	sgd	gene	gene_id YEL032W; gene_name MCM3; gene_source sgd; gene_biotype protein_coding;	1	339	tandem	TRUE	TRUE	YEL032W	MCM3	strong_peak	any_peak_overlap
IG_1475_genes-complement	chr05	89852	90257	chr05	90223	94007	+	tandemW	1475	sgd	gene	gene_id YEL031W; gene_name SPF1; gene_source sgd; gene_biotype protein_coding;	1	406	tandem	TRUE	TRUE	YEL031W	SPF1	mild_peak	any_peak_overlap
IG_1478_genes-complement	chr05	97796	98667	chr05	96748	97861	-	divergent	1478	sgd	gene	gene_id YEL029C; gene_name BUD16; gene_source sgd; gene_biotype protein_coding;	-1	872	divergent	TRUE	TRUE	YEL029C	BUD16	no_peak_overlap	no_peak_overlap
IG_1478_genes-complement	chr05	97796	98667	chr05	98584	99207	+	divergent	1478	sgd	gene	gene_id YEL028W; gene_source sgd; gene_biotype protein_coding;	1	872	divergent	TRUE	TRUE	YEL028W		no_peak_overlap	no_peak_overlap
IG_1479_genes-complement	chr05	99129	100768	chr05	100698	101495	+	tandemW	1479	sgd	gene	gene_id YEL027W; gene_name VMA3; gene_source sgd; gene_biotype protein_coding;	1	1640	tandem	TRUE	TRUE	YEL027W	VMA3	mild_peak	any_peak_overlap
IG_148_genes-complement	chr02	107406	107931	chr02	105239	107492	-	divergent	148	sgd	gene	gene_id YBL061C; gene_name SKT5; gene_source sgd; gene_biotype protein_coding;	-1	526	divergent	TRUE	TRUE	YBL061C	SKT5	no_peak_overlap	no_peak_overlap
IG_148_genes-complement	chr02	107406	107931	chr02	107893	110047	+	divergent	148	sgd	gene	gene_id YBL060W; gene_name YEL1; gene_source sgd; gene_biotype protein_coding;	1	526	divergent	TRUE	TRUE	YBL060W	YEL1	no_peak_overlap	no_peak_overlap
IG_1480_genes-complement	chr05	101251	101942	chr05	101846	102397	+	tandemW	1480	sgd	gene	gene_id YEL026W; gene_name SNU13; gene_source sgd; gene_biotype protein_coding;	1	692	tandem	TRUE	TRUE	YEL026W	SNU13	mild_peak	any_peak_overlap
IG_1482_genes-complement	chr05	106147	107259	chr05	107176	108123	+	divergent	1482	sgd	gene	gene_id YEL024W; gene_name RIP1; gene_source sgd; gene_biotype protein_coding;	1	1113	divergent	TRUE	TRUE	YEL024W	RIP1	mild_peak	any_peak_overlap
IG_1482_genes-complement	chr05	106147	107259	chr05	102379	106236	-	divergent	1482	sgd	gene	gene_id YEL025C; gene_source sgd; gene_biotype protein_coding;	-1	1113	divergent	TRUE	TRUE	YEL025C		mild_peak	any_peak_overlap
IG_1484_genes-complement	chr05	110552	111420	chr05	108381	110617	-	divergent	1484	sgd	gene	gene_id YEL023C; gene_source sgd; gene_biotype protein_coding;	-1	869	divergent	TRUE	TRUE	YEL023C		no_peak_overlap	no_peak_overlap
IG_1484_genes-complement	chr05	110552	111420	chr05	111333	115886	+	divergent	1484	sgd	gene	gene_id YEL022W; gene_name GEA2; gene_source sgd; gene_biotype protein_coding;	1	869	divergent	TRUE	TRUE	YEL022W	GEA2	no_peak_overlap	no_peak_overlap
IG_1485_genes-complement	chr05	115800	116166	chr05	116128	117041	+	tandemW	1485	sgd	gene	gene_id YEL021W; gene_name URA3; gene_source sgd; gene_biotype protein_coding;	1	367	tandem	TRUE	TRUE	YEL021W	URA3	mild_peak	any_peak_overlap
IG_1488_genes-complement	chr05	120299	120497	chr05	118523	120342	-	tandemC	1488	sgd	gene	gene_id YEL020C; gene_name PXP1; gene_source sgd; gene_biotype protein_coding;	-1	199	tandem	TRUE	TRUE	YEL020C	PXP1	no_peak_overlap	no_peak_overlap
IG_1489_genes-complement	chr05	121301	121454	chr05	120356	121320	-	tandemC	1489	sgd	gene	gene_id YEL019C; gene_name MMS21; gene_source sgd; gene_biotype protein_coding;	-1	154	tandem	TRUE	TRUE	YEL019C	MMS21	no_peak_overlap	no_peak_overlap
IG_1491_genes-complement	chr05	122929	123656	chr05	122652	123000	-	divergent	1491	sgd	gene	gene_id YEL017C-A; gene_name PMP2; gene_source sgd; gene_biotype protein_coding;	-1	728	divergent	TRUE	TRUE	YEL017C-A	PMP2	mild_peak	any_peak_overlap
IG_1491_genes-complement	chr05	122929	123656	chr05	123619	124756	+	divergent	1491	sgd	gene	gene_id YEL017W; gene_name GTT3; gene_source sgd; gene_biotype protein_coding;	1	728	divergent	TRUE	TRUE	YEL017W	GTT3	mild_peak	any_peak_overlap
IG_1493_genes-complement	chr05	126218	126628	chr05	126592	128374	+	divergent	1493	sgd	gene	gene_id YEL015W; gene_name EDC3; gene_source sgd; gene_biotype protein_coding;	1	411	divergent	TRUE	TRUE	YEL015W	EDC3	no_peak_overlap	no_peak_overlap
IG_1493_genes-complement	chr05	126218	126628	chr05	124621	126325	-	divergent	1493	sgd	gene	gene_id YEL016C; gene_name NPP2; gene_source sgd; gene_biotype protein_coding;	-1	411	divergent	TRUE	TRUE	YEL016C	NPP2	no_peak_overlap	no_peak_overlap
IG_1495_genes-complement	chr05	128608	128824	chr05	128223	128664	-	divergent	1495	sgd	gene	gene_id YEL014C; gene_source sgd; gene_biotype protein_coding;	-1	217	divergent	TRUE	TRUE	YEL014C		no_peak_overlap	no_peak_overlap
IG_1495_genes-complement	chr05	128608	128824	chr05	128742	130674	+	divergent	1495	sgd	gene	gene_id YEL013W; gene_name VAC8; gene_source sgd; gene_biotype protein_coding;	1	217	divergent	TRUE	TRUE	YEL013W	VAC8	no_peak_overlap	no_peak_overlap
IG_1496_genes-complement	chr05	130561	131771	chr05	131664	132653	+	tandemW	1496	sgd	gene	gene_id YEL012W; gene_name UBC8; gene_source sgd; gene_biotype protein_coding;	1	1211	tandem	TRUE	TRUE	YEL012W	UBC8	mild_peak	any_peak_overlap
IG_1497_genes-complement	chr05	132551	133119	chr05	133069	135330	+	tandemW	1497	sgd	gene	gene_id YEL011W; gene_name GLC3; gene_source sgd; gene_biotype protein_coding;	1	569	tandem	TRUE	TRUE	YEL011W	GLC3	strong_peak	any_peak_overlap
IG_1498_genes-complement	chr05	135234	136278	chr05	136201	136693	+	tandemW	1498	sgd	gene	gene_id YEL010W; gene_source sgd; gene_biotype protein_coding;	1	1045	tandem	TRUE	TRUE	YEL010W		strong_peak	any_peak_overlap
IG_1499_genes-complement	chr05	136778	138917	chr05	136190	136854	-	tandemC	1499	sgd	gene	gene_id YEL009C-A; gene_source sgd; gene_biotype protein_coding;	-1	2140	tandem	TRUE	TRUE	YEL009C-A		strong_peak	any_peak_overlap
IG_150_genes-complement	chr02	110539	110593	chr02	109940	110566	-	divergent	150	sgd	gene	gene_id YBL059C-A; gene_name CMC2; gene_source sgd; gene_biotype protein_coding;	-1	55	divergent	TRUE	TRUE	YBL059C-A	CMC2	no_peak_overlap	no_peak_overlap
IG_150_genes-complement	chr02	110539	110593	chr02	110475	111305	+	divergent	150	sgd	gene	gene_id YBL059W; gene_source sgd; gene_biotype protein_coding;	1	55	divergent	TRUE	TRUE	YBL059W		no_peak_overlap	no_peak_overlap
IG_1500_genes-complement	chr05	139763	140511	chr05	138823	139822	-	divergent	1500	sgd	gene	gene_id YEL009C; gene_name GCN4; gene_source sgd; gene_biotype protein_coding;	-1	749	divergent	TRUE	TRUE	YEL009C	GCN4	strong_peak	any_peak_overlap
IG_1500_genes-complement	chr05	139763	140511	chr05	140439	141112	+	divergent	1500	sgd	gene	gene_id YEL008W; gene_source sgd; gene_biotype protein_coding;	1	749	divergent	TRUE	TRUE	YEL008W		strong_peak	any_peak_overlap
IG_1501_genes-complement	chr05	140892	141891	chr05	141798	144014	+	tandemW	1501	sgd	gene	gene_id YEL007W; gene_name MIT1; gene_source sgd; gene_biotype protein_coding;	1	1000	tandem	TRUE	TRUE	YEL007W	MIT1	strong_peak	any_peak_overlap
IG_1502_genes-complement	chr05	143892	144326	chr05	144261	145503	+	tandemW	1502	sgd	gene	gene_id YEL006W; gene_name YEA6; gene_source sgd; gene_biotype protein_coding;	1	435	tandem	TRUE	TRUE	YEL006W	YEA6	mild_peak	any_peak_overlap
IG_1504_genes-complement	chr05	146755	146950	chr05	145820	146779	-	divergent	1504	sgd	gene	gene_id YEL005C; gene_name VAB2; gene_source sgd; gene_biotype protein_coding;	-1	196	divergent	TRUE	TRUE	YEL005C	VAB2	no_peak_overlap	no_peak_overlap
IG_1504_genes-complement	chr05	146755	146950	chr05	146909	148084	+	divergent	1504	sgd	gene	gene_id YEL004W; gene_name YEA4; gene_source sgd; gene_biotype protein_coding;	1	196	divergent	TRUE	TRUE	YEL004W	YEA4	no_peak_overlap	no_peak_overlap
IG_1505_genes-complement	chr05	147979	148175	chr05	148144	148723	+	tandemW	1505	sgd	gene	gene_id YEL003W; gene_name GIM4; gene_source sgd; gene_biotype protein_coding;	1	197	tandem	TRUE	TRUE	YEL003W	GIM4	no_peak_overlap	no_peak_overlap
IG_1507_genes-complement	chr05	150014	150300	chr05	148622	150065	-	tandemC	1507	sgd	gene	gene_id YEL002C; gene_name WBP1; gene_source sgd; gene_biotype protein_coding;	-1	287	tandem	TRUE	TRUE	YEL002C	WBP1	no_peak_overlap	no_peak_overlap
IG_1508_genes-complement	chr05	150978	153519	chr05	153471	155965	+	divergent	1508	sgd	gene	gene_id YER001W; gene_name MNN1; gene_source sgd; gene_biotype protein_coding;	1	2542	divergent	TRUE	TRUE	YER001W	MNN1	strong_peak	any_peak_overlap
IG_1508_genes-complement	chr05	150978	153519	chr05	150201	151012	-	divergent	1508	sgd	gene	gene_id YEL001C; gene_name IRC22; gene_source sgd; gene_biotype protein_coding;	-1	2542	divergent	TRUE	TRUE	YEL001C	IRC22	strong_peak	any_peak_overlap
IG_1509_genes-complement	chr05	155808	156802	chr05	156749	157594	+	tandemW	1509	sgd	gene	gene_id YER002W; gene_name NOP16; gene_source sgd; gene_biotype protein_coding;	1	995	tandem	TRUE	TRUE	YER002W	NOP16	no_peak_overlap	no_peak_overlap
IG_151_genes-complement	chr02	111244	111436	chr02	111403	112826	+	tandemW	151	sgd	gene	gene_id YBL058W; gene_name SHP1; gene_source sgd; gene_biotype protein_coding;	1	193	tandem	TRUE	TRUE	YBL058W	SHP1	no_peak_overlap	no_peak_overlap
IG_1511_genes-complement	chr05	159118	159579	chr05	159560	160508	+	divergent	1511	sgd	gene	gene_id YER004W; gene_name FMP52; gene_source sgd; gene_biotype protein_coding;	1	462	divergent	TRUE	TRUE	YER004W	FMP52	mild_peak	any_peak_overlap
IG_1511_genes-complement	chr05	159118	159579	chr05	157634	159153	-	divergent	1511	sgd	gene	gene_id YER003C; gene_name PMI40; gene_source sgd; gene_biotype protein_coding;	-1	462	divergent	TRUE	TRUE	YER003C	PMI40	mild_peak	any_peak_overlap
IG_1512_genes-complement	chr05	160275	160549	chr05	160493	162555	+	tandemW	1512	sgd	gene	gene_id YER005W; gene_name YND1; gene_source sgd; gene_biotype protein_coding;	1	275	tandem	TRUE	TRUE	YER005W	YND1	mild_peak	any_peak_overlap
IG_1513_genes-complement	chr05	162442	162722	chr05	162689	164372	+	tandemW	1513	sgd	gene	gene_id YER006W; gene_name NUG1; gene_source sgd; gene_biotype protein_coding;	1	281	tandem	TRUE	TRUE	YER006W	NUG1	no_peak_overlap	no_peak_overlap
IG_1516_genes-complement	chr05	166885	167807	chr05	166115	166924	-	tandemC	1516	sgd	gene	gene_id YER007C-A; gene_name TMA20; gene_source sgd; gene_biotype protein_coding;	-1	923	tandem	TRUE	TRUE	YER007C-A	TMA20	no_peak_overlap	no_peak_overlap
IG_1517_genes-complement	chr05	171818	172114	chr05	167712	171881	-	divergent	1517	sgd	gene	gene_id YER008C; gene_name SEC3; gene_source sgd; gene_biotype protein_coding;	-1	297	divergent	TRUE	TRUE	YER008C	SEC3	no_peak_overlap	no_peak_overlap
IG_1517_genes-complement	chr05	171818	172114	chr05	172073	172659	+	divergent	1517	sgd	gene	gene_id YER009W; gene_name NTF2; gene_source sgd; gene_biotype protein_coding;	1	297	divergent	TRUE	TRUE	YER009W	NTF2	no_peak_overlap	no_peak_overlap
IG_1519_genes-complement	chr05	173338	175247	chr05	175191	176131	+	divergent	1519	sgd	gene	gene_id YER011W; gene_name TIR1; gene_source sgd; gene_biotype protein_coding;	1	1910	divergent	TRUE	TRUE	YER011W	TIR1	mild_peak	any_peak_overlap
IG_1519_genes-complement	chr05	173338	175247	chr05	172508	173366	-	divergent	1519	sgd	gene	gene_id YER010C; gene_source sgd; gene_biotype protein_coding;	-1	1910	divergent	TRUE	TRUE	YER010C		mild_peak	any_peak_overlap
IG_1520_genes-complement	chr05	176012	177834	chr05	177775	178560	+	tandemW	1520	sgd	gene	gene_id YER012W; gene_name PRE1; gene_source sgd; gene_biotype protein_coding;	1	1823	tandem	TRUE	TRUE	YER012W	PRE1	strong_peak	any_peak_overlap
IG_1520_genes-complement	chr05	176012	177834	chr05	177775	178560	+	tandemW	1520	sgd	gene	gene_id YER012W; gene_name PRE1; gene_source sgd; gene_biotype protein_coding;	1	1823	tandem	TRUE	TRUE	YER012W	PRE1	mild_peak	any_peak_overlap
IG_1521_genes-complement	chr05	178431	178840	chr05	178811	182360	+	tandemW	1521	sgd	gene	gene_id YER013W; gene_name PRP22; gene_source sgd; gene_biotype protein_coding;	1	410	tandem	TRUE	TRUE	YER013W	PRP22	no_peak_overlap	no_peak_overlap
IG_1522_genes-complement	chr05	182278	182599	chr05	182557	184321	+	tandemW	1522	sgd	gene	gene_id YER014W; gene_name HEM14; gene_source sgd; gene_biotype protein_coding;	1	322	tandem	TRUE	TRUE	YER014W	HEM14	no_peak_overlap	no_peak_overlap
IG_1523_genes-complement	chr05	186775	188276	chr05	188247	189429	+	tandemW	1523	sgd	gene	gene_id YER016W; gene_name BIM1; gene_source sgd; gene_biotype protein_coding;	1	1502	tandem	TRUE	TRUE	YER016W	BIM1	no_peak_overlap	no_peak_overlap
IG_1525_genes-complement	chr05	191788	191958	chr05	189345	191870	-	tandemC	1525	sgd	gene	gene_id YER017C; gene_name AFG3; gene_source sgd; gene_biotype protein_coding;	-1	171	tandem	TRUE	TRUE	YER017C	AFG3	mild_peak	any_peak_overlap
IG_1526_genes-complement	chr05	192624	192796	chr05	191861	192675	-	divergent	1526	sgd	gene	gene_id YER018C; gene_name SPC25; gene_source sgd; gene_biotype protein_coding;	-1	173	divergent	TRUE	TRUE	YER018C	SPC25	no_peak_overlap	no_peak_overlap
IG_1526_genes-complement	chr05	192624	192796	chr05	192744	194317	+	divergent	1526	sgd	gene	gene_id YER019W; gene_name ISC1; gene_source sgd; gene_biotype protein_coding;	1	173	divergent	TRUE	TRUE	YER019W	ISC1	no_peak_overlap	no_peak_overlap
IG_1528_genes-complement	chr05	194539	195167	chr05	194218	194597	-	divergent	1528	sgd	gene	gene_id YER019C-A; gene_name SBH2; gene_source sgd; gene_biotype protein_coding;	-1	629	divergent	TRUE	TRUE	YER019C-A	SBH2	strong_peak	any_peak_overlap
IG_1528_genes-complement	chr05	194539	195167	chr05	195091	196692	+	divergent	1528	sgd	gene	gene_id YER020W; gene_name GPA2; gene_source sgd; gene_biotype protein_coding;	1	629	divergent	TRUE	TRUE	YER020W	GPA2	strong_peak	any_peak_overlap
IG_1529_genes-complement	chr05	196517	196947	chr05	196916	198639	+	tandemW	1529	sgd	gene	gene_id YER021W; gene_name RPN3; gene_source sgd; gene_biotype protein_coding;	1	431	tandem	TRUE	TRUE	YER021W	RPN3	mild_peak	any_peak_overlap
IG_153_genes-complement	chr02	113427	113761	chr02	112727	113444	-	divergent	153	sgd	gene	gene_id YBL057C; gene_name PTH2; gene_source sgd; gene_biotype protein_coding;	-1	335	divergent	TRUE	TRUE	YBL057C	PTH2	no_peak_overlap	no_peak_overlap
IG_153_genes-complement	chr02	113427	113761	chr02	113653	115388	+	divergent	153	sgd	gene	gene_id YBL056W; gene_name PTC3; gene_source sgd; gene_biotype protein_coding;	1	335	divergent	TRUE	TRUE	YBL056W	PTC3	no_peak_overlap	no_peak_overlap
IG_1530_genes-complement	chr05	198519	198811	chr05	198774	200973	+	tandemW	1530	sgd	gene	gene_id YER022W; gene_name SRB4; gene_source sgd; gene_biotype protein_coding;	1	293	tandem	TRUE	TRUE	YER022W	SRB4	no_peak_overlap	no_peak_overlap
IG_1531_genes-complement	chr05	200875	201075	chr05	201042	202025	+	tandemW	1531	sgd	gene	gene_id YER023W; gene_name PRO3; gene_source sgd; gene_biotype protein_coding;	1	201	tandem	TRUE	TRUE	YER023W	PRO3	no_peak_overlap	no_peak_overlap
IG_1532_genes-complement	chr05	201936	202191	chr05	202160	205070	+	tandemW	1532	sgd	gene	gene_id YER024W; gene_name YAT2; gene_source sgd; gene_biotype protein_coding;	1	256	tandem	TRUE	TRUE	YER024W	YAT2	strong_peak	any_peak_overlap
IG_1533_genes-complement	chr05	204963	205250	chr05	205204	207071	+	tandemW	1533	sgd	gene	gene_id YER025W; gene_name GCD11; gene_source sgd; gene_biotype protein_coding;	1	288	tandem	TRUE	TRUE	YER025W	GCD11	mild_peak	any_peak_overlap
IG_1535_genes-complement	chr05	208474	208978	chr05	207523	208498	-	tandemC	1535	sgd	gene	gene_id YER026C; gene_name CHO1; gene_source sgd; gene_biotype protein_coding;	-1	505	tandem	TRUE	TRUE	YER026C	CHO1	no_peak_overlap	no_peak_overlap
IG_1536_genes-complement	chr05	210232	210691	chr05	208798	210309	-	tandemC	1536	sgd	gene	gene_id YER027C; gene_name GAL83; gene_source sgd; gene_biotype protein_coding;	-1	460	tandem	TRUE	TRUE	YER027C	GAL83	no_peak_overlap	no_peak_overlap
IG_1537_genes-complement	chr05	211876	212586	chr05	210634	211927	-	tandemC	1537	sgd	gene	gene_id YER028C; gene_name MIG3; gene_source sgd; gene_biotype protein_coding;	-1	711	tandem	TRUE	TRUE	YER028C	MIG3	mild_peak	any_peak_overlap
IG_1538_genes-complement	chr05	213177	213436	chr05	212491	213236	-	divergent	1538	sgd	gene	gene_id YER029C; gene_name SMB1; gene_source sgd; gene_biotype protein_coding;	-1	260	divergent	TRUE	TRUE	YER029C	SMB1	no_peak_overlap	no_peak_overlap
IG_1538_genes-complement	chr05	213177	213436	chr05	213418	214021	+	divergent	1538	sgd	gene	gene_id YER030W; gene_name CHZ1; gene_source sgd; gene_biotype protein_coding;	1	260	divergent	TRUE	TRUE	YER030W	CHZ1	no_peak_overlap	no_peak_overlap
IG_1540_genes-complement	chr05	214747	215062	chr05	213910	214779	-	divergent	1540	sgd	gene	gene_id YER031C; gene_name YPT31; gene_source sgd; gene_biotype protein_coding;	-1	316	divergent	TRUE	TRUE	YER031C	YPT31	no_peak_overlap	no_peak_overlap
IG_1540_genes-complement	chr05	214747	215062	chr05	214994	217892	+	divergent	1540	sgd	gene	gene_id YER032W; gene_name FIR1; gene_source sgd; gene_biotype protein_coding;	1	316	divergent	TRUE	TRUE	YER032W	FIR1	no_peak_overlap	no_peak_overlap
IG_1542_genes-complement	chr05	221287	221845	chr05	221823	222622	+	divergent	1542	sgd	gene	gene_id YER034W; gene_source sgd; gene_biotype protein_coding;	1	559	divergent	TRUE	TRUE	YER034W		strong_peak	any_peak_overlap
IG_1542_genes-complement	chr05	221287	221845	chr05	217865	221323	-	divergent	1542	sgd	gene	gene_id YER033C; gene_name ZRG8; gene_source sgd; gene_biotype protein_coding;	-1	559	divergent	TRUE	TRUE	YER033C	ZRG8	strong_peak	any_peak_overlap
IG_1543_genes-complement	chr05	222403	222638	chr05	222575	223221	+	tandemW	1543	sgd	gene	gene_id YER035W; gene_name EDC2; gene_source sgd; gene_biotype protein_coding;	1	236	tandem	TRUE	TRUE	YER035W	EDC2	strong_peak	any_peak_overlap
IG_1545_genes-complement	chr05	225199	225888	chr05	225859	227069	+	divergent	1545	sgd	gene	gene_id YER037W; gene_name PHM8; gene_source sgd; gene_biotype protein_coding;	1	690	divergent	TRUE	TRUE	YER037W	PHM8	strong_peak	any_peak_overlap
IG_1545_genes-complement	chr05	225199	225888	chr05	223261	225236	-	divergent	1545	sgd	gene	gene_id YER036C; gene_name ARB1; gene_source sgd; gene_biotype protein_coding;	-1	690	divergent	TRUE	TRUE	YER036C	ARB1	strong_peak	any_peak_overlap
IG_1547_genes-complement	chr05	228252	228450	chr05	226858	228252	-	divergent	1547	sgd	gene	gene_id YER038C; gene_name KRE29; gene_source sgd; gene_biotype protein_coding;	-1	199	divergent	FALSE	TRUE	YER038C	KRE29	no_peak_overlap	no_peak_overlap
IG_1547_genes-complement	chr05	228252	228450	chr05	228451	228831	+	divergent	1547	sgd	gene	gene_id YER038W-A; gene_name FMP49; gene_source sgd; gene_biotype protein_coding;	1	199	divergent	FALSE	TRUE	YER038W-A	FMP49	no_peak_overlap	no_peak_overlap
IG_1548_genes-complement	chr05	229205	229262	chr05	228285	229249	-	tandemC	1548	sgd	gene	gene_id YER039C; gene_name HVG1; gene_source sgd; gene_biotype protein_coding;	-1	58	tandem	TRUE	TRUE	YER039C	HVG1	no_peak_overlap	no_peak_overlap
IG_1549_genes-complement	chr05	229481	229794	chr05	229263	229481	-	divergent	1549	sgd	gene	gene_id YER039C-A; gene_source sgd; gene_biotype protein_coding;	-1	314	divergent	FALSE	TRUE	YER039C-A		no_peak_overlap	no_peak_overlap
IG_1549_genes-complement	chr05	229481	229794	chr05	229718	232215	+	divergent	1549	sgd	gene	gene_id YER040W; gene_name GLN3; gene_source sgd; gene_biotype protein_coding;	1	314	divergent	TRUE	TRUE	YER040W	GLN3	no_peak_overlap	no_peak_overlap
IG_155_genes-complement	chr02	116829	117588	chr02	117477	119328	+	divergent	155	sgd	gene	gene_id YBL054W; gene_name TOD6; gene_source sgd; gene_biotype protein_coding;	1	760	divergent	TRUE	TRUE	YBL054W	TOD6	mild_peak	any_peak_overlap
IG_155_genes-complement	chr02	116829	117588	chr02	115470	116873	-	divergent	155	sgd	gene	gene_id YBL055C; gene_source sgd; gene_biotype protein_coding;	-1	760	divergent	TRUE	TRUE	YBL055C		mild_peak	any_peak_overlap
IG_1550_genes-complement	chr05	231987	232460	chr05	232389	234910	+	tandemW	1550	sgd	gene	gene_id YER041W; gene_name YEN1; gene_source sgd; gene_biotype protein_coding;	1	474	tandem	TRUE	TRUE	YER041W	YEN1	no_peak_overlap	no_peak_overlap
IG_1551_genes-complement	chr05	234740	234936	chr05	234901	235667	+	tandemW	1551	sgd	gene	gene_id YER042W; gene_name MXR1; gene_source sgd; gene_biotype protein_coding;	1	197	tandem	TRUE	TRUE	YER042W	MXR1	no_peak_overlap	no_peak_overlap
IG_1553_genes-complement	chr05	237119	237569	chr05	235544	237148	-	tandemC	1553	sgd	gene	gene_id YER043C; gene_name SAH1; gene_source sgd; gene_biotype protein_coding;	-1	451	tandem	TRUE	TRUE	YER043C	SAH1	mild_peak	any_peak_overlap
IG_1554_genes-complement	chr05	238016	238459	chr05	237444	238072	-	tandemC	1554	sgd	gene	gene_id YER044C; gene_name ERG28; gene_source sgd; gene_biotype protein_coding;	-1	444	tandem	TRUE	TRUE	YER044C	ERG28	mild_peak	any_peak_overlap
IG_1555_genes-complement	chr05	239774	240031	chr05	238247	239860	-	tandemC	1555	sgd	gene	gene_id YER044C-A; gene_name MEI4; gene_source sgd; gene_biotype protein_coding;	-1	258	tandem	TRUE	TRUE	YER044C-A	MEI4	no_peak_overlap	no_peak_overlap
IG_1556_genes-complement	chr05	241501	243179	chr05	239909	241593	-	divergent	1556	sgd	gene	gene_id YER045C; gene_name ACA1; gene_source sgd; gene_biotype protein_coding;	-1	1679	divergent	TRUE	TRUE	YER045C	ACA1	mild_peak	any_peak_overlap
IG_1556_genes-complement	chr05	241501	243179	chr05	243118	243701	+	divergent	1556	sgd	gene	gene_id YER046W; gene_name SPO73; gene_source sgd; gene_biotype protein_coding;	1	1679	divergent	TRUE	TRUE	YER046W	SPO73	mild_peak	any_peak_overlap
IG_1557_genes-complement	chr05	243611	243699	chr05	243700	244029	+	tandemW	1557	sgd	gene	gene_id YER046W-A; gene_source sgd; gene_biotype protein_coding;	1	89	tandem	FALSE	TRUE	YER046W-A		no_peak_overlap	no_peak_overlap
IG_1558_genes-complement	chr05	246503	246981	chr05	243724	246593	-	tandemC	1558	sgd	gene	gene_id YER047C; gene_name SAP1; gene_source sgd; gene_biotype protein_coding;	-1	479	tandem	TRUE	TRUE	YER047C	SAP1	no_peak_overlap	no_peak_overlap
IG_1559_genes-complement	chr05	248157	250717	chr05	250648	251228	+	divergent	1559	sgd	gene	gene_id YER048W-A; gene_name ISD11; gene_source sgd; gene_biotype protein_coding;	1	2561	divergent	TRUE	TRUE	YER048W-A	ISD11	mild_peak	any_peak_overlap
IG_1559_genes-complement	chr05	248157	250717	chr05	246860	248240	-	divergent	1559	sgd	gene	gene_id YER048C; gene_name CAJ1; gene_source sgd; gene_biotype protein_coding;	-1	2561	divergent	TRUE	TRUE	YER048C	CAJ1	mild_peak	any_peak_overlap
IG_156_genes-complement	chr02	119166	119334	chr02	119335	119709	+	tandemW	156	sgd	gene	gene_id YBL053W; gene_source sgd; gene_biotype protein_coding;	1	169	tandem	FALSE	TRUE	YBL053W		no_peak_overlap	no_peak_overlap
IG_1560_genes-complement	chr05	251002	251727	chr05	251669	253748	+	tandemW	1560	sgd	gene	gene_id YER049W; gene_name TPA1; gene_source sgd; gene_biotype protein_coding;	1	726	tandem	TRUE	TRUE	YER049W	TPA1	no_peak_overlap	no_peak_overlap
IG_1562_genes-complement	chr05	254387	254655	chr05	253847	254443	-	divergent	1562	sgd	gene	gene_id YER050C; gene_name RSM18; gene_source sgd; gene_biotype protein_coding;	-1	269	divergent	TRUE	TRUE	YER050C	RSM18	no_peak_overlap	no_peak_overlap
IG_1562_genes-complement	chr05	254387	254655	chr05	254637	256344	+	divergent	1562	sgd	gene	gene_id YER051W; gene_name JHD1; gene_source sgd; gene_biotype protein_coding;	1	269	divergent	TRUE	TRUE	YER051W	JHD1	no_peak_overlap	no_peak_overlap
IG_1564_genes-complement	chr05	257958	258736	chr05	256251	258041	-	tandemC	1564	sgd	gene	gene_id YER052C; gene_name HOM3; gene_source sgd; gene_biotype protein_coding;	-1	779	tandem	TRUE	TRUE	YER052C	HOM3	mild_peak	any_peak_overlap
IG_1565_genes-complement	chr05	259639	260932	chr05	258595	259726	-	tandemC	1565	sgd	gene	gene_id YER053C; gene_name PIC2; gene_source sgd; gene_biotype protein_coding;	-1	1294	tandem	TRUE	TRUE	YER053C	PIC2	strong_peak	any_peak_overlap
IG_1566_genes-complement	chr05	261046	262051	chr05	260752	261095	-	tandemC	1566	sgd	gene	gene_id YER053C-A; gene_source sgd; gene_biotype protein_coding;	-1	1006	tandem	TRUE	TRUE	YER053C-A		strong_peak	any_peak_overlap
IG_1567_genes-complement	chr05	263698	264891	chr05	261869	263764	-	tandemC	1567	sgd	gene	gene_id YER054C; gene_name GIP2; gene_source sgd; gene_biotype protein_coding;	-1	1194	tandem	TRUE	TRUE	YER054C	GIP2	strong_peak	any_peak_overlap
IG_1568_genes-complement	chr05	265785	266511	chr05	264795	265832	-	tandemC	1568	sgd	gene	gene_id YER055C; gene_name HIS1; gene_source sgd; gene_biotype protein_coding;	-1	727	tandem	TRUE	TRUE	YER055C	HIS1	mild_peak	any_peak_overlap
IG_1569_genes-complement	chr05	268113	269422	chr05	266385	268198	-	tandemC	1569	sgd	gene	gene_id YER056C; gene_name FCY2; gene_source sgd; gene_biotype protein_coding;	-1	1310	tandem	TRUE	TRUE	YER056C	FCY2	strong_peak	any_peak_overlap
IG_157_genes-complement	chr02	121874	122752	chr02	119299	121979	-	tandemC	157	sgd	gene	gene_id YBL052C; gene_name SAS3; gene_source sgd; gene_biotype protein_coding;	-1	879	tandem	TRUE	TRUE	YBL052C	SAS3	no_peak_overlap	no_peak_overlap
IG_1570_genes-complement	chr05	270185	270736	chr05	269337	270213	-	tandemC	1570	sgd	gene	gene_id YER056C-A; gene_name RPL34A; gene_source sgd; gene_biotype protein_coding;	-1	552	tandem	TRUE	TRUE	YER056C-A	RPL34A	mild_peak	any_peak_overlap
IG_1571_genes-complement	chr05	271126	271767	chr05	270640	271170	-	divergent	1571	sgd	gene	gene_id YER057C; gene_name HMF1; gene_source sgd; gene_biotype protein_coding;	-1	642	divergent	TRUE	TRUE	YER057C	HMF1	no_peak_overlap	no_peak_overlap
IG_1571_genes-complement	chr05	271126	271767	chr05	271738	272217	+	divergent	1571	sgd	gene	gene_id YER058W; gene_name PET117; gene_source sgd; gene_biotype protein_coding;	1	642	divergent	TRUE	TRUE	YER058W	PET117	no_peak_overlap	no_peak_overlap
IG_1572_genes-complement	chr05	272091	272623	chr05	272504	273968	+	tandemW	1572	sgd	gene	gene_id YER059W; gene_name PCL6; gene_source sgd; gene_biotype protein_coding;	1	533	tandem	TRUE	TRUE	YER059W	PCL6	no_peak_overlap	no_peak_overlap
IG_1573_genes-complement	chr05	273886	274566	chr05	274465	276275	+	tandemW	1573	sgd	gene	gene_id YER060W; gene_name FCY21; gene_source sgd; gene_biotype protein_coding;	1	681	tandem	TRUE	TRUE	YER060W	FCY21	no_peak_overlap	no_peak_overlap
IG_1574_genes-complement	chr05	276153	276571	chr05	276499	278306	+	tandemW	1574	sgd	gene	gene_id YER060W-A; gene_name FCY22; gene_source sgd; gene_biotype protein_coding;	1	419	tandem	TRUE	TRUE	YER060W-A	FCY22	no_peak_overlap	no_peak_overlap
IG_1576_genes-complement	chr05	279626	279929	chr05	278220	279664	-	tandemC	1576	sgd	gene	gene_id YER061C; gene_name CEM1; gene_source sgd; gene_biotype protein_coding;	-1	304	tandem	TRUE	TRUE	YER061C	CEM1	no_peak_overlap	no_peak_overlap
IG_1577_genes-complement	chr05	280682	281709	chr05	279755	280763	-	divergent	1577	sgd	gene	gene_id YER062C; gene_source sgd; gene_biotype protein_coding;	-1	1028	divergent	TRUE	TRUE	YER062C		mild_peak	any_peak_overlap
IG_1577_genes-complement	chr05	280682	281709	chr05	281646	282527	+	divergent	1577	sgd	gene	gene_id YER063W; gene_name THO1; gene_source sgd; gene_biotype protein_coding;	1	1028	divergent	TRUE	TRUE	YER063W	THO1	mild_peak	any_peak_overlap
IG_1579_genes-complement	chr05	284222	285240	chr05	282482	284294	-	tandemC	1579	sgd	gene	gene_id YER064C; gene_name VHR2; gene_source sgd; gene_biotype protein_coding;	-1	1019	tandem	TRUE	TRUE	YER064C	VHR2	strong_peak	any_peak_overlap
IG_158_genes-complement	chr02	124759	125124	chr02	122611	124824	-	divergent	158	sgd	gene	gene_id YBL051C; gene_name PIN4; gene_source sgd; gene_biotype protein_coding;	-1	366	divergent	TRUE	TRUE	YBL051C	PIN4	no_peak_overlap	no_peak_overlap
IG_158_genes-complement	chr02	124759	125124	chr02	125051	126186	+	divergent	158	sgd	gene	gene_id YBL050W; gene_name SEC17; gene_source sgd; gene_biotype protein_coding;	1	366	divergent	TRUE	TRUE	YBL050W	SEC17	no_peak_overlap	no_peak_overlap
IG_1580_genes-complement	chr05	286914	290241	chr05	285119	286951	-	divergent	1580	sgd	gene	gene_id YER065C; gene_name ICL1; gene_source sgd; gene_biotype protein_coding;	-1	3328	divergent	TRUE	TRUE	YER065C	ICL1	mild_peak	any_peak_overlap
IG_1580_genes-complement	chr05	286914	290241	chr05	285119	286951	-	divergent	1580	sgd	gene	gene_id YER065C; gene_name ICL1; gene_source sgd; gene_biotype protein_coding;	-1	3328	divergent	TRUE	TRUE	YER065C	ICL1	strong_peak	any_peak_overlap
IG_1580_genes-complement	chr05	286914	290241	chr05	290143	290947	+	divergent	1580	sgd	gene	gene_id YER066W; gene_name RRT13; gene_source sgd; gene_biotype protein_coding;	1	3328	divergent	TRUE	TRUE	YER066W	RRT13	mild_peak	any_peak_overlap
IG_1580_genes-complement	chr05	286914	290241	chr05	290143	290947	+	divergent	1580	sgd	gene	gene_id YER066W; gene_name RRT13; gene_source sgd; gene_biotype protein_coding;	1	3328	divergent	TRUE	TRUE	YER066W	RRT13	strong_peak	any_peak_overlap
IG_1582_genes-complement	chr05	292563	293049	chr05	292240	292563	-	divergent	1582	sgd	gene	gene_id YER067C-A; gene_source sgd; gene_biotype protein_coding;	-1	487	divergent	FALSE	TRUE	YER067C-A		no_peak_overlap	no_peak_overlap
IG_1582_genes-complement	chr05	292563	293049	chr05	292969	294920	+	divergent	1582	sgd	gene	gene_id YER068W; gene_name MOT2; gene_source sgd; gene_biotype protein_coding;	1	487	divergent	TRUE	TRUE	YER068W	MOT2	no_peak_overlap	no_peak_overlap
IG_1584_genes-complement	chr05	298001	298949	chr05	298881	301812	+	tandemW	1584	sgd	gene	gene_id YER070W; gene_name RNR1; gene_source sgd; gene_biotype protein_coding;	1	949	tandem	TRUE	TRUE	YER070W	RNR1	strong_peak	any_peak_overlap
IG_1586_genes-complement	chr05	302327	302805	chr05	302734	303334	+	divergent	1586	sgd	gene	gene_id YER072W; gene_name VTC1; gene_source sgd; gene_biotype protein_coding;	1	479	divergent	TRUE	TRUE	YER072W	VTC1	strong_peak	any_peak_overlap
IG_1586_genes-complement	chr05	302327	302805	chr05	301746	302349	-	divergent	1586	sgd	gene	gene_id YER071C; gene_name TDA2; gene_source sgd; gene_biotype protein_coding;	-1	479	divergent	TRUE	TRUE	YER071C	TDA2	strong_peak	any_peak_overlap
IG_1587_genes-complement	chr05	303195	304029	chr05	303952	305749	+	tandemW	1587	sgd	gene	gene_id YER073W; gene_name ALD5; gene_source sgd; gene_biotype protein_coding;	1	835	tandem	TRUE	TRUE	YER073W	ALD5	strong_peak	any_peak_overlap
IG_1588_genes-complement	chr05	305592	306322	chr05	306281	307296	+	tandemW	1588	sgd	gene	gene_id YER074W; gene_name RPS24A; gene_source sgd; gene_biotype protein_coding;	1	731	tandem	TRUE	TRUE	YER074W	RPS24A	mild_peak	any_peak_overlap
IG_1589_genes-complement	chr05	307196	307652	chr05	307609	308215	+	tandemW	1589	sgd	gene	gene_id YER074W-A; gene_name YOS1; gene_source sgd; gene_biotype protein_coding;	1	457	tandem	TRUE	TRUE	YER074W-A	YOS1	no_peak_overlap	no_peak_overlap
IG_159_genes-complement	chr02	126119	126827	chr02	126725	127418	+	tandemW	159	sgd	gene	gene_id YBL049W; gene_name MOH1; gene_source sgd; gene_biotype protein_coding;	1	709	tandem	TRUE	TRUE	YBL049W	MOH1	strong_peak	any_peak_overlap
IG_1591_genes-complement	chr05	311199	312589	chr05	308280	311329	-	tandemC	1591	sgd	gene	gene_id YER075C; gene_name PTP3; gene_source sgd; gene_biotype protein_coding;	-1	1391	tandem	TRUE	TRUE	YER075C	PTP3	strong_peak	any_peak_overlap
IG_1593_genes-complement	chr05	316600	316806	chr05	314458	316681	-	tandemC	1593	sgd	gene	gene_id YER077C; gene_name MRX1; gene_source sgd; gene_biotype protein_coding;	-1	207	tandem	TRUE	TRUE	YER077C	MRX1	no_peak_overlap	no_peak_overlap
IG_1594_genes-complement	chr05	318342	318645	chr05	316718	318470	-	divergent	1594	sgd	gene	gene_id YER078C; gene_name ICP55; gene_source sgd; gene_biotype protein_coding;	-1	304	divergent	TRUE	TRUE	YER078C	ICP55	no_peak_overlap	no_peak_overlap
IG_1594_genes-complement	chr05	318342	318645	chr05	318538	318875	+	divergent	1594	sgd	gene	gene_id YER078W-A; gene_source sgd; gene_biotype protein_coding;	1	304	divergent	TRUE	TRUE	YER078W-A		no_peak_overlap	no_peak_overlap
IG_1595_genes-complement	chr05	318810	318919	chr05	318840	319769	+	tandemW	1595	sgd	gene	gene_id YER079W; gene_source sgd; gene_biotype protein_coding;	1	110	tandem	TRUE	TRUE	YER079W		no_peak_overlap	no_peak_overlap
IG_1597_genes-complement	chr05	321846	322685	chr05	322657	324256	+	tandemW	1597	sgd	gene	gene_id YER081W; gene_name SER3; gene_source sgd; gene_biotype protein_coding;	1	840	tandem	TRUE	TRUE	YER081W	SER3	mild_peak	any_peak_overlap
IG_1599_genes-complement	chr05	325936	326173	chr05	324185	325992	-	tandemC	1599	sgd	gene	gene_id YER082C; gene_name UTP7; gene_source sgd; gene_biotype protein_coding;	-1	238	tandem	TRUE	TRUE	YER082C	UTP7	no_peak_overlap	no_peak_overlap
IG_16_genes-complement	chr01	37147	37463	chr01	37405	39101	+	tandemW	16	sgd	gene	gene_id YAL058W; gene_name CNE1; gene_source sgd; gene_biotype protein_coding;	1	317	tandem	TRUE	TRUE	YAL058W	CNE1	no_peak_overlap	no_peak_overlap
IG_160_genes-complement	chr02	127244	127298	chr02	127237	127835	+	tandemW	160	sgd	gene	gene_id YBL048W; gene_name RRT1; gene_source sgd; gene_biotype protein_coding;	1	55	tandem	TRUE	TRUE	YBL048W	RRT1	strong_peak	any_peak_overlap
IG_1600_genes-complement	chr05	327031	327064	chr05	326122	327051	-	divergent	1600	sgd	gene	gene_id YER083C; gene_name GET2; gene_source sgd; gene_biotype protein_coding;	-1	34	divergent	TRUE	TRUE	YER083C	GET2	no_peak_overlap	no_peak_overlap
IG_1600_genes-complement	chr05	327031	327064	chr05	326989	327641	+	divergent	1600	sgd	gene	gene_id YER084W; gene_source sgd; gene_biotype protein_coding;	1	34	divergent	TRUE	TRUE	YER084W		no_peak_overlap	no_peak_overlap
IG_1601_genes-complement	chr05	327451	327597	chr05	327598	328110	+	tandemW	1601	sgd	gene	gene_id YER084W-A; gene_source sgd; gene_biotype protein_coding;	1	147	tandem	FALSE	TRUE	YER084W-A		mild_peak	any_peak_overlap
IG_1602_genes-complement	chr05	328140	328476	chr05	327466	328201	-	divergent	1602	sgd	gene	gene_id YER085C; gene_source sgd; gene_biotype protein_coding;	-1	337	divergent	TRUE	TRUE	YER085C		no_peak_overlap	no_peak_overlap
IG_1602_genes-complement	chr05	328140	328476	chr05	328425	330339	+	divergent	1602	sgd	gene	gene_id YER086W; gene_name ILV1; gene_source sgd; gene_biotype protein_coding;	1	337	divergent	TRUE	TRUE	YER086W	ILV1	no_peak_overlap	no_peak_overlap
IG_1603_genes-complement	chr05	330207	330575	chr05	330526	332419	+	tandemW	1603	sgd	gene	gene_id YER087W; gene_name AIM10; gene_source sgd; gene_biotype protein_coding;	1	369	tandem	TRUE	TRUE	YER087W	AIM10	no_peak_overlap	no_peak_overlap
IG_1604_genes-complement	chr05	332368	332581	chr05	331817	332368	-	tandemC	1604	sgd	gene	gene_id YER087C-A; gene_source sgd; gene_biotype protein_coding;	-1	214	tandem	FALSE	TRUE	YER087C-A		no_peak_overlap	no_peak_overlap
IG_1605_genes-complement	chr05	332830	333175	chr05	332367	332868	-	tandemC	1605	sgd	gene	gene_id YER087C-B; gene_name SBH1; gene_source sgd; gene_biotype protein_coding;	-1	346	tandem	TRUE	TRUE	YER087C-B	SBH1	mild_peak	any_peak_overlap
IG_1606_genes-complement	chr05	335188	335695	chr05	333036	335272	-	tandemC	1606	sgd	gene	gene_id YER088C; gene_name DOT6; gene_source sgd; gene_biotype protein_coding;	-1	508	tandem	TRUE	TRUE	YER088C	DOT6	mild_peak	any_peak_overlap
IG_1607_genes-complement	chr05	337340	337948	chr05	335871	337391	-	divergent	1607	sgd	gene	gene_id YER089C; gene_name PTC2; gene_source sgd; gene_biotype protein_coding;	-1	609	divergent	TRUE	TRUE	YER089C	PTC2	no_peak_overlap	no_peak_overlap
IG_1607_genes-complement	chr05	337340	337948	chr05	337885	339586	+	divergent	1607	sgd	gene	gene_id YER090W; gene_name TRP2; gene_source sgd; gene_biotype protein_coding;	1	609	divergent	TRUE	TRUE	YER090W	TRP2	no_peak_overlap	no_peak_overlap
IG_1609_genes-complement	chr05	342167	342389	chr05	339633	342237	-	tandemC	1609	sgd	gene	gene_id YER091C; gene_name MET6; gene_source sgd; gene_biotype protein_coding;	-1	223	tandem	TRUE	TRUE	YER091C	MET6	strong_peak	any_peak_overlap
IG_1610_genes-complement	chr05	342611	342854	chr05	342827	343382	+	divergent	1610	sgd	gene	gene_id YER092W; gene_name IES5; gene_source sgd; gene_biotype protein_coding;	1	244	divergent	TRUE	TRUE	YER092W	IES5	strong_peak	any_peak_overlap
IG_1610_genes-complement	chr05	342611	342854	chr05	342230	342675	-	divergent	1610	sgd	gene	gene_id YER091C-A; gene_source sgd; gene_biotype protein_coding;	-1	244	divergent	TRUE	TRUE	YER091C-A		strong_peak	any_peak_overlap
IG_1612_genes-complement	chr05	347612	347911	chr05	343213	347675	-	tandemC	1612	sgd	gene	gene_id YER093C; gene_name TSC11; gene_source sgd; gene_biotype protein_coding;	-1	300	tandem	TRUE	TRUE	YER093C	TSC11	no_peak_overlap	no_peak_overlap
IG_1613_genes-complement	chr05	348400	348728	chr05	347782	348420	-	tandemC	1613	sgd	gene	gene_id YER093C-A; gene_name AIM11; gene_source sgd; gene_biotype protein_coding;	-1	329	tandem	TRUE	TRUE	YER093C-A	AIM11	no_peak_overlap	no_peak_overlap
IG_1614_genes-complement	chr05	349346	349979	chr05	348569	349438	-	divergent	1614	sgd	gene	gene_id YER094C; gene_name PUP3; gene_source sgd; gene_biotype protein_coding;	-1	634	divergent	TRUE	TRUE	YER094C	PUP3	strong_peak	any_peak_overlap
IG_1614_genes-complement	chr05	349346	349979	chr05	349929	351384	+	divergent	1614	sgd	gene	gene_id YER095W; gene_name RAD51; gene_source sgd; gene_biotype protein_coding;	1	634	divergent	TRUE	TRUE	YER095W	RAD51	strong_peak	any_peak_overlap
IG_1615_genes-complement	chr05	351182	351697	chr05	351606	353407	+	tandemW	1615	sgd	gene	gene_id YER096W; gene_name SHC1; gene_source sgd; gene_biotype protein_coding;	1	516	tandem	TRUE	TRUE	YER096W	SHC1	mild_peak	any_peak_overlap
IG_1616_genes-complement	chr05	353236	355139	chr05	355140	355469	+	tandemW	1616	sgd	gene	gene_id YER097W; gene_source sgd; gene_biotype protein_coding;	1	1904	tandem	FALSE	TRUE	YER097W		mild_peak	any_peak_overlap
IG_1618_genes-complement	chr05	359061	359561	chr05	358034	359087	-	divergent	1618	sgd	gene	gene_id YER099C; gene_name PRS2; gene_source sgd; gene_biotype protein_coding;	-1	501	divergent	TRUE	TRUE	YER099C	PRS2	mild_peak	any_peak_overlap
IG_1618_genes-complement	chr05	359061	359561	chr05	359481	360405	+	divergent	1618	sgd	gene	gene_id YER100W; gene_name UBC6; gene_source sgd; gene_biotype protein_coding;	1	501	divergent	TRUE	TRUE	YER100W	UBC6	mild_peak	any_peak_overlap
IG_162_genes-complement	chr02	132040	132423	chr02	127718	132162	-	divergent	162	sgd	gene	gene_id YBL047C; gene_name EDE1; gene_source sgd; gene_biotype protein_coding;	-1	384	divergent	TRUE	TRUE	YBL047C	EDE1	no_peak_overlap	no_peak_overlap
IG_162_genes-complement	chr02	132040	132423	chr02	132412	133924	+	divergent	162	sgd	gene	gene_id YBL046W; gene_name PSY4; gene_source sgd; gene_biotype protein_coding;	1	384	divergent	TRUE	TRUE	YBL046W	PSY4	no_peak_overlap	no_peak_overlap
IG_1620_genes-complement	chr05	361794	363099	chr05	362707	363835	+	divergent	1620	sgd	gene	gene_id YER102W; gene_name RPS8B; gene_source sgd; gene_biotype protein_coding;	1	1306	divergent	TRUE	TRUE	YER102W	RPS8B	mild_peak	any_peak_overlap
IG_1620_genes-complement	chr05	361794	363099	chr05	360362	361849	-	divergent	1620	sgd	gene	gene_id YER101C; gene_name AST2; gene_source sgd; gene_biotype protein_coding;	-1	1306	divergent	TRUE	TRUE	YER101C	AST2	mild_peak	any_peak_overlap
IG_1621_genes-complement	chr05	363702	364588	chr05	364540	366639	+	tandemW	1621	sgd	gene	gene_id YER103W; gene_name SSA4; gene_source sgd; gene_biotype protein_coding;	1	887	tandem	TRUE	TRUE	YER103W	SSA4	no_peak_overlap	no_peak_overlap
IG_1622_genes-complement	chr05	366517	366801	chr05	366772	367639	+	tandemW	1622	sgd	gene	gene_id YER104W; gene_name RTT105; gene_source sgd; gene_biotype protein_coding;	1	285	tandem	TRUE	TRUE	YER104W	RTT105	no_peak_overlap	no_peak_overlap
IG_1624_genes-complement	chr05	372013	372325	chr05	367699	372048	-	divergent	1624	sgd	gene	gene_id YER105C; gene_name NUP157; gene_source sgd; gene_biotype protein_coding;	-1	313	divergent	TRUE	TRUE	YER105C	NUP157	no_peak_overlap	no_peak_overlap
IG_1624_genes-complement	chr05	372013	372325	chr05	372249	373418	+	divergent	1624	sgd	gene	gene_id YER106W; gene_name MAM1; gene_source sgd; gene_biotype protein_coding;	1	313	divergent	TRUE	TRUE	YER106W	MAM1	no_peak_overlap	no_peak_overlap
IG_1627_genes-complement	chr05	382103	382594	chr05	378637	382220	-	tandemC	1627	sgd	gene	gene_id YER110C; gene_name KAP123; gene_source sgd; gene_biotype protein_coding;	-1	492	tandem	TRUE	TRUE	YER110C	KAP123	no_peak_overlap	no_peak_overlap
IG_1628_genes-complement	chr05	385876	387231	chr05	387159	387883	+	divergent	1628	sgd	gene	gene_id YER112W; gene_name LSM4; gene_source sgd; gene_biotype protein_coding;	1	1356	divergent	TRUE	TRUE	YER112W	LSM4	mild_peak	any_peak_overlap
IG_1628_genes-complement	chr05	385876	387231	chr05	382482	385998	-	divergent	1628	sgd	gene	gene_id YER111C; gene_name SWI4; gene_source sgd; gene_biotype protein_coding;	-1	1356	divergent	TRUE	TRUE	YER111C	SWI4	mild_peak	any_peak_overlap
IG_1630_genes-complement	chr05	390052	390589	chr05	387784	390162	-	tandemC	1630	sgd	gene	gene_id YER113C; gene_name TMN3; gene_source sgd; gene_biotype protein_coding;	-1	538	tandem	TRUE	TRUE	YER113C	TMN3	no_peak_overlap	no_peak_overlap
IG_1631_genes-complement	chr05	393712	394291	chr05	390364	393749	-	tandemC	1631	sgd	gene	gene_id YER114C; gene_name BOI2; gene_source sgd; gene_biotype protein_coding;	-1	580	tandem	TRUE	TRUE	YER114C	BOI2	mild_peak	any_peak_overlap
IG_1632_genes-complement	chr05	394867	395347	chr05	394186	394988	-	tandemC	1632	sgd	gene	gene_id YER115C; gene_name SPR6; gene_source sgd; gene_biotype protein_coding;	-1	481	tandem	TRUE	TRUE	YER115C	SPR6	no_peak_overlap	no_peak_overlap
IG_1633_genes-complement	chr05	396172	396768	chr05	396742	397724	+	divergent	1633	sgd	gene	gene_id YER117W; gene_name RPL23B; gene_source sgd; gene_biotype protein_coding;	1	597	divergent	TRUE	TRUE	YER117W	RPL23B	mild_peak	any_peak_overlap
IG_1633_genes-complement	chr05	396172	396768	chr05	395249	396252	-	divergent	1633	sgd	gene	gene_id YER116C; gene_name SLX8; gene_source sgd; gene_biotype protein_coding;	-1	597	divergent	TRUE	TRUE	YER116C	SLX8	mild_peak	any_peak_overlap
IG_1635_genes-complement	chr05	399055	399495	chr05	397788	399173	-	tandemC	1635	sgd	gene	gene_id YER118C; gene_name SHO1; gene_source sgd; gene_biotype protein_coding;	-1	441	tandem	TRUE	TRUE	YER118C	SHO1	no_peak_overlap	no_peak_overlap
IG_1636_genes-complement	chr05	400842	400866	chr05	399393	400878	-	tandemC	1636	sgd	gene	gene_id YER119C; gene_name AVT6; gene_source sgd; gene_biotype protein_coding;	-1	25	tandem	TRUE	TRUE	YER119C	AVT6	strong_peak	any_peak_overlap
IG_1637_genes-complement	chr05	401869	402374	chr05	402310	402832	+	tandemW	1637	sgd	gene	gene_id YER121W; gene_source sgd; gene_biotype protein_coding;	1	506	tandem	TRUE	TRUE	YER121W		strong_peak	any_peak_overlap
IG_1639_genes-complement	chr05	404352	404812	chr05	402746	404429	-	divergent	1639	sgd	gene	gene_id YER122C; gene_name GLO3; gene_source sgd; gene_biotype protein_coding;	-1	461	divergent	TRUE	TRUE	YER122C	GLO3	no_peak_overlap	no_peak_overlap
IG_1639_genes-complement	chr05	404352	404812	chr05	404762	406434	+	divergent	1639	sgd	gene	gene_id YER123W; gene_name YCK3; gene_source sgd; gene_biotype protein_coding;	1	461	divergent	TRUE	TRUE	YER123W	YCK3	no_peak_overlap	no_peak_overlap
IG_164_genes-complement	chr02	135516	135997	chr02	133960	135623	-	divergent	164	sgd	gene	gene_id YBL045C; gene_name COR1; gene_source sgd; gene_biotype protein_coding;	-1	482	divergent	TRUE	TRUE	YBL045C	COR1	strong_peak	any_peak_overlap
IG_164_genes-complement	chr02	135516	135997	chr02	135922	136523	+	divergent	164	sgd	gene	gene_id YBL044W; gene_source sgd; gene_biotype protein_coding;	1	482	divergent	TRUE	TRUE	YBL044W		strong_peak	any_peak_overlap
IG_1641_genes-complement	chr05	409063	410188	chr05	407271	409098	-	divergent	1641	sgd	gene	gene_id YER124C; gene_name DSE1; gene_source sgd; gene_biotype protein_coding;	-1	1126	divergent	TRUE	TRUE	YER124C	DSE1	mild_peak	any_peak_overlap
IG_1641_genes-complement	chr05	409063	410188	chr05	410147	412729	+	divergent	1641	sgd	gene	gene_id YER125W; gene_name RSP5; gene_source sgd; gene_biotype protein_coding;	1	1126	divergent	TRUE	TRUE	YER125W	RSP5	mild_peak	any_peak_overlap
IG_1643_genes-complement	chr05	414179	414480	chr05	413212	414220	-	divergent	1643	sgd	gene	gene_id YER126C; gene_name NSA2; gene_source sgd; gene_biotype protein_coding;	-1	302	divergent	TRUE	TRUE	YER126C	NSA2	no_peak_overlap	no_peak_overlap
IG_1643_genes-complement	chr05	414179	414480	chr05	414459	415646	+	divergent	1643	sgd	gene	gene_id YER127W; gene_name LCP5; gene_source sgd; gene_biotype protein_coding;	1	302	divergent	TRUE	TRUE	YER127W	LCP5	no_peak_overlap	no_peak_overlap
IG_1644_genes-complement	chr05	415554	415858	chr05	415827	416603	+	tandemW	1644	sgd	gene	gene_id YER128W; gene_name VFA1; gene_source sgd; gene_biotype protein_coding;	1	305	tandem	TRUE	TRUE	YER128W	VFA1	no_peak_overlap	no_peak_overlap
IG_1645_genes-complement	chr05	416470	417280	chr05	417208	420940	+	tandemW	1645	sgd	gene	gene_id YER129W; gene_name SAK1; gene_source sgd; gene_biotype protein_coding;	1	811	tandem	TRUE	TRUE	YER129W	SAK1	no_peak_overlap	no_peak_overlap
IG_1647_genes-complement	chr05	422446	423951	chr05	420895	422519	-	divergent	1647	sgd	gene	gene_id YER130C; gene_name COM2; gene_source sgd; gene_biotype protein_coding;	-1	1506	divergent	TRUE	TRUE	YER130C	COM2	strong_peak	any_peak_overlap
IG_1647_genes-complement	chr05	422446	423951	chr05	423530	424435	+	divergent	1647	sgd	gene	gene_id YER131W; gene_name RPS26B; gene_source sgd; gene_biotype protein_coding;	1	1506	divergent	TRUE	TRUE	YER131W	RPS26B	strong_peak	any_peak_overlap
IG_1649_genes-complement	chr05	430449	432494	chr05	432431	434132	+	divergent	1649	sgd	gene	gene_id YER133W; gene_name GLC7; gene_source sgd; gene_biotype protein_coding;	1	2046	divergent	TRUE	TRUE	YER133W	GLC7	mild_peak	any_peak_overlap
IG_1649_genes-complement	chr05	430449	432494	chr05	425049	430565	-	divergent	1649	sgd	gene	gene_id YER132C; gene_name PMD1; gene_source sgd; gene_biotype protein_coding;	-1	2046	divergent	TRUE	TRUE	YER132C	PMD1	mild_peak	any_peak_overlap
IG_165_genes-complement	chr02	136366	136687	chr02	136556	137642	+	tandemW	165	sgd	gene	gene_id YBL043W; gene_name ECM13; gene_source sgd; gene_biotype protein_coding;	1	322	tandem	TRUE	TRUE	YBL043W	ECM13	strong_peak	any_peak_overlap
IG_1650_genes-complement	chr05	433958	437190	chr05	437191	437532	+	tandemW	1650	sgd	gene	gene_id YER133W-A; gene_source sgd; gene_biotype protein_coding;	1	3233	tandem	FALSE	TRUE	YER133W-A		mild_peak	any_peak_overlap
IG_1651_genes-complement	chr05	437803	437951	chr05	437069	437835	-	tandemC	1651	sgd	gene	gene_id YER134C; gene_source sgd; gene_biotype protein_coding;	-1	149	tandem	TRUE	TRUE	YER134C		no_peak_overlap	no_peak_overlap
IG_1652_genes-complement	chr05	438344	439615	chr05	439515	441208	+	divergent	1652	sgd	gene	gene_id YER136W; gene_name GDI1; gene_source sgd; gene_biotype protein_coding;	1	1272	divergent	TRUE	TRUE	YER136W	GDI1	mild_peak	any_peak_overlap
IG_1652_genes-complement	chr05	438344	439615	chr05	437952	438344	-	divergent	1652	sgd	gene	gene_id YER135C; gene_source sgd; gene_biotype protein_coding;	-1	1272	divergent	FALSE	TRUE	YER135C		mild_peak	any_peak_overlap
IG_1654_genes-complement	chr05	441880	449473	chr05	449397	449602	+	tandemW	1654	sgd	gene	gene_id YER138W-A; gene_source sgd; gene_biotype protein_coding;	1	7594	tandem	TRUE	TRUE	YER138W-A		strong_peak	any_peak_overlap
IG_1656_genes-complement	chr05	451243	451564	chr05	450365	451346	-	divergent	1656	sgd	gene	gene_id YER139C; gene_name RTR1; gene_source sgd; gene_biotype protein_coding;	-1	322	divergent	TRUE	TRUE	YER139C	RTR1	no_peak_overlap	no_peak_overlap
IG_1656_genes-complement	chr05	451243	451564	chr05	451520	453437	+	divergent	1656	sgd	gene	gene_id YER140W; gene_name EMP65; gene_source sgd; gene_biotype protein_coding;	1	322	divergent	TRUE	TRUE	YER140W	EMP65	no_peak_overlap	no_peak_overlap
IG_1657_genes-complement	chr05	453235	453458	chr05	453414	455141	+	tandemW	1657	sgd	gene	gene_id YER141W; gene_name COX15; gene_source sgd; gene_biotype protein_coding;	1	224	tandem	TRUE	TRUE	YER141W	COX15	mild_peak	any_peak_overlap
IG_1659_genes-complement	chr05	456036	456318	chr05	455054	456081	-	divergent	1659	sgd	gene	gene_id YER142C; gene_name MAG1; gene_source sgd; gene_biotype protein_coding;	-1	283	divergent	TRUE	TRUE	YER142C	MAG1	no_peak_overlap	no_peak_overlap
IG_1659_genes-complement	chr05	456036	456318	chr05	456269	457746	+	divergent	1659	sgd	gene	gene_id YER143W; gene_name DDI1; gene_source sgd; gene_biotype protein_coding;	1	283	divergent	TRUE	TRUE	YER143W	DDI1	no_peak_overlap	no_peak_overlap
IG_1661_genes-complement	chr05	460223	460525	chr05	457678	460233	-	tandemC	1661	sgd	gene	gene_id YER144C; gene_name UBP5; gene_source sgd; gene_biotype protein_coding;	-1	303	tandem	TRUE	TRUE	YER144C	UBP5	no_peak_overlap	no_peak_overlap
IG_1662_genes-complement	chr05	461740	462385	chr05	460414	461773	-	tandemC	1662	sgd	gene	gene_id YER145C; gene_name FTR1; gene_source sgd; gene_biotype protein_coding;	-1	646	tandem	TRUE	TRUE	YER145C	FTR1	mild_peak	any_peak_overlap
IG_1664_genes-complement	chr05	464842	465202	chr05	462863	464888	-	tandemC	1664	sgd	gene	gene_id YER147C; gene_name SCC4; gene_source sgd; gene_biotype protein_coding;	-1	361	tandem	TRUE	TRUE	YER147C	SCC4	mild_peak	any_peak_overlap
IG_1665_genes-complement	chr05	466025	466184	chr05	466185	466763	+	tandemW	1665	sgd	gene	gene_id YER148W-A; gene_source sgd; gene_biotype protein_coding;	1	160	tandem	FALSE	TRUE	YER148W-A		no_peak_overlap	no_peak_overlap
IG_1666_genes-complement	chr05	467470	468369	chr05	468333	468963	+	divergent	1666	sgd	gene	gene_id YER150W; gene_name SPI1; gene_source sgd; gene_biotype protein_coding;	1	900	divergent	TRUE	TRUE	YER150W	SPI1	strong_peak	any_peak_overlap
IG_1666_genes-complement	chr05	467470	468369	chr05	466103	467533	-	divergent	1666	sgd	gene	gene_id YER149C; gene_name PEA2; gene_source sgd; gene_biotype protein_coding;	-1	900	divergent	TRUE	TRUE	YER149C	PEA2	strong_peak	any_peak_overlap
IG_1668_genes-complement	chr05	472424	472656	chr05	469605	472506	-	tandemC	1668	sgd	gene	gene_id YER151C; gene_name UBP3; gene_source sgd; gene_biotype protein_coding;	-1	233	tandem	TRUE	TRUE	YER151C	UBP3	no_peak_overlap	no_peak_overlap
IG_1669_genes-complement	chr05	474805	475019	chr05	474041	474805	-	divergent	1669	sgd	gene	gene_id YER153C; gene_name PET122; gene_source sgd; gene_biotype protein_coding;	-1	215	divergent	FALSE	TRUE	YER153C	PET122	no_peak_overlap	no_peak_overlap
IG_1669_genes-complement	chr05	474805	475019	chr05	474992	476288	+	divergent	1669	sgd	gene	gene_id YER154W; gene_name OXA1; gene_source sgd; gene_biotype protein_coding;	1	215	divergent	TRUE	TRUE	YER154W	OXA1	no_peak_overlap	no_peak_overlap
IG_167_genes-complement	chr02	140260	141246	chr02	138177	140318	-	divergent	167	sgd	gene	gene_id YBL042C; gene_name FUI1; gene_source sgd; gene_biotype protein_coding;	-1	987	divergent	TRUE	TRUE	YBL042C	FUI1	strong_peak	any_peak_overlap
IG_167_genes-complement	chr02	140260	141246	chr02	141211	142066	+	divergent	167	sgd	gene	gene_id YBL041W; gene_name PRE7; gene_source sgd; gene_biotype protein_coding;	1	987	divergent	TRUE	TRUE	YBL041W	PRE7	strong_peak	any_peak_overlap
IG_1671_genes-complement	chr05	482848	483324	chr05	476191	482890	-	tandemC	1671	sgd	gene	gene_id YER155C; gene_name BEM2; gene_source sgd; gene_biotype protein_coding;	-1	477	tandem	TRUE	TRUE	YER155C	BEM2	no_peak_overlap	no_peak_overlap
IG_1672_genes-complement	chr05	484341	484787	chr05	483211	484359	-	divergent	1672	sgd	gene	gene_id YER156C; gene_source sgd; gene_biotype protein_coding;	-1	447	divergent	TRUE	TRUE	YER156C		no_peak_overlap	no_peak_overlap
IG_1672_genes-complement	chr05	484341	484787	chr05	484765	487247	+	divergent	1672	sgd	gene	gene_id YER157W; gene_name COG3; gene_source sgd; gene_biotype protein_coding;	1	447	divergent	TRUE	TRUE	YER157W	COG3	no_peak_overlap	no_peak_overlap
IG_1674_genes-complement	chr05	490578	491486	chr05	488720	490645	-	divergent	1674	sgd	gene	gene_id YER158C; gene_source sgd; gene_biotype protein_coding;	-1	909	divergent	TRUE	TRUE	YER158C		strong_peak	any_peak_overlap
IG_1674_genes-complement	chr05	490578	491486	chr05	491453	491715	+	divergent	1674	sgd	gene	gene_id YER158W-A; gene_source sgd; gene_biotype protein_coding;	1	909	divergent	TRUE	TRUE	YER158W-A		strong_peak	any_peak_overlap
IG_1675_genes-complement	chr05	491958	499346	chr05	491396	492062	-	tandemC	1675	sgd	gene	gene_id YER159C; gene_name BUR6; gene_source sgd; gene_biotype protein_coding;	-1	7389	tandem	TRUE	TRUE	YER159C	BUR6	mild_peak	any_peak_overlap
IG_1675_genes-complement	chr05	491958	499346	chr05	491396	492062	-	tandemC	1675	sgd	gene	gene_id YER159C; gene_name BUR6; gene_source sgd; gene_biotype protein_coding;	-1	7389	tandem	TRUE	TRUE	YER159C	BUR6	strong_peak	any_peak_overlap
IG_1676_genes-complement	chr05	500348	500629	chr05	499105	500391	-	tandemC	1676	sgd	gene	gene_id YER161C; gene_name SPT2; gene_source sgd; gene_biotype protein_coding;	-1	282	tandem	TRUE	TRUE	YER161C	SPT2	no_peak_overlap	no_peak_overlap
IG_1677_genes-complement	chr05	502894	503083	chr05	500486	502929	-	tandemC	1677	sgd	gene	gene_id YER162C; gene_name RAD4; gene_source sgd; gene_biotype protein_coding;	-1	190	tandem	TRUE	TRUE	YER162C	RAD4	mild_peak	any_peak_overlap
IG_1678_genes-complement	chr05	503782	505391	chr05	505315	509920	+	divergent	1678	sgd	gene	gene_id YER164W; gene_name CHD1; gene_source sgd; gene_biotype protein_coding;	1	1610	divergent	TRUE	TRUE	YER164W	CHD1	mild_peak	any_peak_overlap
IG_1678_genes-complement	chr05	503782	505391	chr05	502981	503800	-	divergent	1678	sgd	gene	gene_id YER163C; gene_name GCG1; gene_source sgd; gene_biotype protein_coding;	-1	1610	divergent	TRUE	TRUE	YER163C	GCG1	mild_peak	any_peak_overlap
IG_1679_genes-complement	chr05	509798	510372	chr05	510232	512238	+	tandemW	1679	sgd	gene	gene_id YER165W; gene_name PAB1; gene_source sgd; gene_biotype protein_coding;	1	575	tandem	TRUE	TRUE	YER165W	PAB1	mild_peak	any_peak_overlap
IG_1681_genes-complement	chr05	517459	518215	chr05	518142	520902	+	tandemW	1681	sgd	gene	gene_id YER167W; gene_name BCK2; gene_source sgd; gene_biotype protein_coding;	1	757	tandem	TRUE	TRUE	YER167W	BCK2	mild_peak	any_peak_overlap
IG_1683_genes-complement	chr05	522669	523368	chr05	523310	525946	+	divergent	1683	sgd	gene	gene_id YER169W; gene_name RPH1; gene_source sgd; gene_biotype protein_coding;	1	700	divergent	TRUE	TRUE	YER169W	RPH1	strong_peak	any_peak_overlap
IG_1683_genes-complement	chr05	522669	523368	chr05	520930	522701	-	divergent	1683	sgd	gene	gene_id YER168C; gene_name CCA1; gene_source sgd; gene_biotype protein_coding;	-1	700	divergent	TRUE	TRUE	YER168C	CCA1	strong_peak	any_peak_overlap
IG_1684_genes-complement	chr05	525759	525973	chr05	525932	526845	+	tandemW	1684	sgd	gene	gene_id YER170W; gene_name ADK2; gene_source sgd; gene_biotype protein_coding;	1	215	tandem	TRUE	TRUE	YER170W	ADK2	no_peak_overlap	no_peak_overlap
IG_1685_genes-complement	chr05	526651	527081	chr05	526967	529520	+	tandemW	1685	sgd	gene	gene_id YER171W; gene_name RAD3; gene_source sgd; gene_biotype protein_coding;	1	431	tandem	TRUE	TRUE	YER171W	RAD3	no_peak_overlap	no_peak_overlap
IG_1687_genes-complement	chr05	536021	536274	chr05	529402	536078	-	tandemC	1687	sgd	gene	gene_id YER172C; gene_name BRR2; gene_source sgd; gene_biotype protein_coding;	-1	254	tandem	TRUE	TRUE	YER172C	BRR2	no_peak_overlap	no_peak_overlap
IG_1689_genes-complement	chr05	539168	539463	chr05	538331	539276	-	tandemC	1689	sgd	gene	gene_id YER174C; gene_name GRX4; gene_source sgd; gene_biotype protein_coding;	-1	296	tandem	TRUE	TRUE	YER174C	GRX4	no_peak_overlap	no_peak_overlap
IG_169_genes-complement	chr02	142868	143392	chr02	142013	142905	-	divergent	169	sgd	gene	gene_id YBL040C; gene_name ERD2; gene_source sgd; gene_biotype protein_coding;	-1	525	divergent	TRUE	TRUE	YBL040C	ERD2	no_peak_overlap	no_peak_overlap
IG_169_genes-complement	chr02	142868	143392	chr02	143293	143708	+	divergent	169	sgd	gene	gene_id YBL039W-B; gene_source sgd; gene_biotype protein_coding;	1	525	divergent	TRUE	TRUE	YBL039W-B		no_peak_overlap	no_peak_overlap
IG_1690_genes-complement	chr05	540363	540649	chr05	539271	540383	-	divergent	1690	sgd	gene	gene_id YER175C; gene_name TMT1; gene_source sgd; gene_biotype protein_coding;	-1	287	divergent	TRUE	TRUE	YER175C	TMT1	no_peak_overlap	no_peak_overlap
IG_1690_genes-complement	chr05	540363	540649	chr05	540572	540897	+	divergent	1690	sgd	gene	gene_id YER175W-A; gene_source sgd; gene_biotype protein_coding;	1	287	divergent	TRUE	TRUE	YER175W-A		no_peak_overlap	no_peak_overlap
IG_1691_genes-complement	chr05	540814	541689	chr05	541650	545160	+	tandemW	1691	sgd	gene	gene_id YER176W; gene_name ECM32; gene_source sgd; gene_biotype protein_coding;	1	876	tandem	TRUE	TRUE	YER176W	ECM32	no_peak_overlap	no_peak_overlap
IG_1692_genes-complement	chr05	545055	545610	chr05	545552	546511	+	tandemW	1692	sgd	gene	gene_id YER177W; gene_name BMH1; gene_source sgd; gene_biotype protein_coding;	1	556	tandem	TRUE	TRUE	YER177W	BMH1	mild_peak	any_peak_overlap
IG_1693_genes-complement	chr05	546414	546816	chr05	546789	548207	+	tandemW	1693	sgd	gene	gene_id YER178W; gene_name PDA1; gene_source sgd; gene_biotype protein_coding;	1	403	tandem	TRUE	TRUE	YER178W	PDA1	mild_peak	any_peak_overlap
IG_1694_genes-complement	chr05	548079	548420	chr05	548384	549610	+	tandemW	1694	sgd	gene	gene_id YER179W; gene_name DMC1; gene_source sgd; gene_biotype protein_coding;	1	342	tandem	TRUE	TRUE	YER179W	DMC1	no_peak_overlap	no_peak_overlap
IG_1696_genes-complement	chr05	550527	550864	chr05	549659	550582	-	tandemC	1696	sgd	gene	gene_id YER180C; gene_name ISC10; gene_source sgd; gene_biotype protein_coding;	-1	338	tandem	TRUE	TRUE	YER180C	ISC10	no_peak_overlap	no_peak_overlap
IG_1697_genes-complement	chr05	551122	551472	chr05	550749	551155	-	tandemC	1697	sgd	gene	gene_id YER180C-A; gene_name SLO1; gene_source sgd; gene_biotype protein_coding;	-1	351	tandem	TRUE	TRUE	YER180C-A	SLO1	mild_peak	any_peak_overlap
IG_1698_genes-complement	chr05	551796	552524	chr05	551473	551796	-	divergent	1698	sgd	gene	gene_id YER181C; gene_source sgd; gene_biotype protein_coding;	-1	729	divergent	FALSE	TRUE	YER181C		no_peak_overlap	no_peak_overlap
IG_1698_genes-complement	chr05	551796	552524	chr05	552486	553346	+	divergent	1698	sgd	gene	gene_id YER182W; gene_name FMP10; gene_source sgd; gene_biotype protein_coding;	1	729	divergent	TRUE	TRUE	YER182W	FMP10	no_peak_overlap	no_peak_overlap
IG_17_genes-complement	chr01	39046	39258	chr01	38696	39046	-	divergent	17	sgd	gene	gene_id YAL056C-A; gene_source sgd; gene_biotype protein_coding;	-1	213	divergent	FALSE	TRUE	YAL056C-A		no_peak_overlap	no_peak_overlap
IG_17_genes-complement	chr01	39046	39258	chr01	39216	42005	+	divergent	17	sgd	gene	gene_id YAL056W; gene_name GPB2; gene_source sgd; gene_biotype protein_coding;	1	213	divergent	TRUE	TRUE	YAL056W	GPB2	no_peak_overlap	no_peak_overlap
IG_1700_genes-complement	chr05	553969	556295	chr05	553240	553972	-	tandemC	1700	sgd	gene	gene_id YER183C; gene_name FAU1; gene_source sgd; gene_biotype protein_coding;	-1	2327	tandem	TRUE	TRUE	YER183C	FAU1	no_peak_overlap	no_peak_overlap
IG_1701_genes-complement	chr05	558680	559453	chr05	559344	560416	+	divergent	1701	sgd	gene	gene_id YER185W; gene_name PUG1; gene_source sgd; gene_biotype protein_coding;	1	774	divergent	TRUE	TRUE	YER185W	PUG1	mild_peak	any_peak_overlap
IG_1701_genes-complement	chr05	558680	559453	chr05	556094	558749	-	divergent	1701	sgd	gene	gene_id YER184C; gene_name TOG1; gene_source sgd; gene_biotype protein_coding;	-1	774	divergent	TRUE	TRUE	YER184C	TOG1	mild_peak	any_peak_overlap
IG_1703_genes-complement	chr05	562625	566229	chr05	561512	562734	-	divergent	1703	sgd	gene	gene_id YER186C; gene_source sgd; gene_biotype protein_coding;	-1	3605	divergent	TRUE	TRUE	YER186C		no_peak_overlap	no_peak_overlap
IG_1703_genes-complement	chr05	562625	566229	chr05	566193	566808	+	divergent	1703	sgd	gene	gene_id YER187W; gene_source sgd; gene_biotype protein_coding;	1	3605	divergent	TRUE	TRUE	YER187W		no_peak_overlap	no_peak_overlap
IG_1704_genes-complement	chr05	566655	568039	chr05	568014	568986	+	tandemW	1704	sgd	gene	gene_id YER188W; gene_source sgd; gene_biotype protein_coding;	1	1385	tandem	TRUE	TRUE	YER188W		no_peak_overlap	no_peak_overlap
IG_1706_genes-complement	chr05	569907	571154	chr05	571099	571745	+	divergent	1706	sgd	gene	gene_id YER189W; gene_source sgd; gene_biotype protein_coding;	1	1248	divergent	TRUE	TRUE	YER189W		strong_peak	any_peak_overlap
IG_1706_genes-complement	chr05	569907	571154	chr05	569608	569907	-	divergent	1706	sgd	gene	gene_id YER188C-A; gene_source sgd; gene_biotype protein_coding;	-1	1248	divergent	FALSE	TRUE	YER188C-A		strong_peak	any_peak_overlap
IG_1709_genes-complement	chr06	535	835	chr06	836	1363	+	tandemW	1709	sgd	gene	gene_id YFL067W; gene_source sgd; gene_biotype protein_coding;	1	301	tandem	FALSE	TRUE	YFL067W		no_peak_overlap	no_peak_overlap
IG_171_genes-complement	chr02	145728	146186	chr02	143824	145782	-	divergent	171	sgd	gene	gene_id YBL039C; gene_name URA7; gene_source sgd; gene_biotype protein_coding;	-1	459	divergent	TRUE	TRUE	YBL039C	URA7	mild_peak	any_peak_overlap
IG_171_genes-complement	chr02	145728	146186	chr02	146120	146965	+	divergent	171	sgd	gene	gene_id YBL038W; gene_name MRPL16; gene_source sgd; gene_biotype protein_coding;	1	459	divergent	TRUE	TRUE	YBL038W	MRPL16	mild_peak	any_peak_overlap
IG_1711_genes-complement	chr06	2615	3029	chr06	1437	2615	-	tandemC	1711	sgd	gene	gene_id YFL066C; gene_source sgd; gene_biotype protein_coding;	-1	415	tandem	FALSE	TRUE	YFL066C		no_peak_overlap	no_peak_overlap
IG_1712_genes-complement	chr06	3846	5065	chr06	4919	5526	+	divergent	1712	sgd	gene	gene_id YFL063W; gene_source sgd; gene_biotype protein_coding;	1	1220	divergent	TRUE	TRUE	YFL063W		mild_peak	any_peak_overlap
IG_1712_genes-complement	chr06	3846	5065	chr06	3322	3846	-	divergent	1712	sgd	gene	gene_id YFL064C; gene_source sgd; gene_biotype protein_coding;	-1	1220	divergent	FALSE	TRUE	YFL064C		mild_peak	any_peak_overlap
IG_1713_genes-complement	chr06	5521	6425	chr06	6388	7643	+	tandemW	1713	sgd	gene	gene_id YFL062W; gene_name COS4; gene_source sgd; gene_biotype protein_coding;	1	905	tandem	TRUE	TRUE	YFL062W	COS4	no_peak_overlap	no_peak_overlap
IG_1714_genes-complement	chr06	7565	9544	chr06	9545	10222	+	tandemW	1714	sgd	gene	gene_id YFL061W; gene_name DDI2; gene_source sgd; gene_biotype protein_coding;	1	1980	tandem	FALSE	TRUE	YFL061W	DDI2	no_peak_overlap	no_peak_overlap
IG_1716_genes-complement	chr06	10969	11362	chr06	10301	10969	-	divergent	1716	sgd	gene	gene_id YFL060C; gene_name SNO3; gene_source sgd; gene_biotype protein_coding;	-1	394	divergent	FALSE	TRUE	YFL060C	SNO3	no_peak_overlap	no_peak_overlap
IG_1716_genes-complement	chr06	10969	11362	chr06	11304	12441	+	divergent	1716	sgd	gene	gene_id YFL059W; gene_name SNZ3; gene_source sgd; gene_biotype protein_coding;	1	394	divergent	TRUE	TRUE	YFL059W	SNZ3	no_peak_overlap	no_peak_overlap
IG_1717_genes-complement	chr06	12259	12928	chr06	12857	14078	+	tandemW	1717	sgd	gene	gene_id YFL058W; gene_name THI5; gene_source sgd; gene_biotype protein_coding;	1	670	tandem	TRUE	TRUE	YFL058W	THI5	no_peak_overlap	no_peak_overlap
IG_1718_genes-complement	chr06	13951	17003	chr06	16950	18825	+	tandemW	1718	sgd	gene	gene_id YFL055W; gene_name AGP3; gene_source sgd; gene_biotype protein_coding;	1	3053	tandem	TRUE	TRUE	YFL055W	AGP3	no_peak_overlap	no_peak_overlap
IG_172_genes-complement	chr02	146885	147208	chr02	147120	150412	+	tandemW	172	sgd	gene	gene_id YBL037W; gene_name APL3; gene_source sgd; gene_biotype protein_coding;	1	324	tandem	TRUE	TRUE	YBL037W	APL3	mild_peak	any_peak_overlap
IG_1720_genes-complement	chr06	22787	23422	chr06	20785	22869	-	divergent	1720	sgd	gene	gene_id YFL054C; gene_name AQY3; gene_source sgd; gene_biotype protein_coding;	-1	636	divergent	TRUE	TRUE	YFL054C	AQY3	mild_peak	any_peak_overlap
IG_1720_genes-complement	chr06	22787	23422	chr06	23391	25385	+	divergent	1720	sgd	gene	gene_id YFL053W; gene_name DAK2; gene_source sgd; gene_biotype protein_coding;	1	636	divergent	TRUE	TRUE	YFL053W	DAK2	mild_peak	any_peak_overlap
IG_1721_genes-complement	chr06	25198	28231	chr06	28232	29629	+	tandemW	1721	sgd	gene	gene_id YFL052W; gene_source sgd; gene_biotype protein_coding;	1	3034	tandem	FALSE	TRUE	YFL052W		no_peak_overlap	no_peak_overlap
IG_1723_genes-complement	chr06	30540	33271	chr06	29901	30648	-	tandemC	1723	sgd	gene	gene_id YFL051C; gene_source sgd; gene_biotype protein_coding;	-1	2732	tandem	TRUE	TRUE	YFL051C		mild_peak	any_peak_overlap
IG_1724_genes-complement	chr06	35848	36802	chr06	33099	35972	-	divergent	1724	sgd	gene	gene_id YFL050C; gene_name ALR2; gene_source sgd; gene_biotype protein_coding;	-1	955	divergent	TRUE	TRUE	YFL050C	ALR2	no_peak_overlap	no_peak_overlap
IG_1724_genes-complement	chr06	35848	36802	chr06	36776	38842	+	divergent	1724	sgd	gene	gene_id YFL049W; gene_name SWP82; gene_source sgd; gene_biotype protein_coding;	1	955	divergent	TRUE	TRUE	YFL049W	SWP82	no_peak_overlap	no_peak_overlap
IG_1726_genes-complement	chr06	40180	40420	chr06	38725	40208	-	divergent	1726	sgd	gene	gene_id YFL048C; gene_name EMP47; gene_source sgd; gene_biotype protein_coding;	-1	241	divergent	TRUE	TRUE	YFL048C	EMP47	no_peak_overlap	no_peak_overlap
IG_1726_genes-complement	chr06	40180	40420	chr06	40411	42639	+	divergent	1726	sgd	gene	gene_id YFL047W; gene_name RGD2; gene_source sgd; gene_biotype protein_coding;	1	241	divergent	TRUE	TRUE	YFL047W	RGD2	no_peak_overlap	no_peak_overlap
IG_1727_genes-complement	chr06	42565	42814	chr06	42782	43591	+	tandemW	1727	sgd	gene	gene_id YFL046W; gene_name FMP32; gene_source sgd; gene_biotype protein_coding;	1	250	tandem	TRUE	TRUE	YFL046W	FMP32	no_peak_overlap	no_peak_overlap
IG_1729_genes-complement	chr06	44392	44654	chr06	43494	44468	-	tandemC	1729	sgd	gene	gene_id YFL045C; gene_name SEC53; gene_source sgd; gene_biotype protein_coding;	-1	263	tandem	TRUE	TRUE	YFL045C	SEC53	no_peak_overlap	no_peak_overlap
IG_1730_genes-complement	chr06	45560	45719	chr06	44453	45582	-	tandemC	1730	sgd	gene	gene_id YFL044C; gene_name OTU1; gene_source sgd; gene_biotype protein_coding;	-1	160	tandem	TRUE	TRUE	YFL044C	OTU1	no_peak_overlap	no_peak_overlap
IG_1731_genes-complement	chr06	47744	48733	chr06	45649	47767	-	divergent	1731	sgd	gene	gene_id YFL042C; gene_source sgd; gene_biotype protein_coding;	-1	990	divergent	TRUE	TRUE	YFL042C		no_peak_overlap	no_peak_overlap
IG_1731_genes-complement	chr06	47744	48733	chr06	48664	48992	+	divergent	1731	sgd	gene	gene_id YFL041W-A; gene_source sgd; gene_biotype protein_coding;	1	990	divergent	TRUE	TRUE	YFL041W-A		no_peak_overlap	no_peak_overlap
IG_1732_genes-complement	chr06	48925	49138	chr06	49117	51179	+	tandemW	1732	sgd	gene	gene_id YFL041W; gene_name FET5; gene_source sgd; gene_biotype protein_coding;	1	214	tandem	TRUE	TRUE	YFL041W	FET5	no_peak_overlap	no_peak_overlap
IG_1733_genes-complement	chr06	51007	51349	chr06	51266	53148	+	tandemW	1733	sgd	gene	gene_id YFL040W; gene_source sgd; gene_biotype protein_coding;	1	343	tandem	TRUE	TRUE	YFL040W		no_peak_overlap	no_peak_overlap
IG_1735_genes-complement	chr06	54696	55365	chr06	53147	54816	-	tandemC	1735	sgd	gene	gene_id YFL039C; gene_name ACT1; gene_source sgd; gene_biotype protein_coding;	-1	670	tandem	TRUE	TRUE	YFL039C	ACT1	mild_peak	any_peak_overlap
IG_1735_genes-complement	chr06	54696	55365	chr06	53147	54816	-	tandemC	1735	sgd	gene	gene_id YFL039C; gene_name ACT1; gene_source sgd; gene_biotype protein_coding;	-1	670	tandem	TRUE	TRUE	YFL039C	ACT1	strong_peak	any_peak_overlap
IG_1736_genes-complement	chr06	55986	56335	chr06	56276	57921	+	divergent	1736	sgd	gene	gene_id YFL037W; gene_name TUB2; gene_source sgd; gene_biotype protein_coding;	1	350	divergent	TRUE	TRUE	YFL037W	TUB2	strong_peak	any_peak_overlap
IG_1736_genes-complement	chr06	55986	56335	chr06	55258	56028	-	divergent	1736	sgd	gene	gene_id YFL038C; gene_name YPT1; gene_source sgd; gene_biotype protein_coding;	-1	350	divergent	TRUE	TRUE	YFL038C	YPT1	strong_peak	any_peak_overlap
IG_1737_genes-complement	chr06	57709	58781	chr06	58668	62950	+	tandemW	1737	sgd	gene	gene_id YFL036W; gene_name RPO41; gene_source sgd; gene_biotype protein_coding;	1	1073	tandem	TRUE	TRUE	YFL036W	RPO41	mild_peak	any_peak_overlap
IG_1739_genes-complement	chr06	63993	64242	chr06	62854	64043	-	tandemC	1739	sgd	gene	gene_id YFL034C-B; gene_name MOB2; gene_source sgd; gene_biotype protein_coding;	-1	250	tandem	TRUE	TRUE	YFL034C-B	MOB2	no_peak_overlap	no_peak_overlap
IG_174_genes-complement	chr02	151220	151492	chr02	150311	151240	-	tandemC	174	sgd	gene	gene_id YBL036C; gene_source sgd; gene_biotype protein_coding;	-1	273	tandem	TRUE	TRUE	YBL036C		no_peak_overlap	no_peak_overlap
IG_1740_genes-complement	chr06	64932	65476	chr06	64168	64978	-	divergent	1740	sgd	gene	gene_id YFL034C-A; gene_name RPL22B; gene_source sgd; gene_biotype protein_coding;	-1	545	divergent	TRUE	TRUE	YFL034C-A	RPL22B	mild_peak	any_peak_overlap
IG_1740_genes-complement	chr06	64932	65476	chr06	65453	68812	+	divergent	1740	sgd	gene	gene_id YFL034W; gene_name MIL1; gene_source sgd; gene_biotype protein_coding;	1	545	divergent	TRUE	TRUE	YFL034W	MIL1	mild_peak	any_peak_overlap
IG_1742_genes-complement	chr06	74427	74871	chr06	68913	74512	-	divergent	1742	sgd	gene	gene_id YFL033C; gene_name RIM15; gene_source sgd; gene_biotype protein_coding;	-1	445	divergent	TRUE	TRUE	YFL033C	RIM15	strong_peak	any_peak_overlap
IG_1742_genes-complement	chr06	74427	74871	chr06	74813	75299	+	divergent	1742	sgd	gene	gene_id YFL032W; gene_source sgd; gene_biotype protein_coding;	1	445	divergent	TRUE	TRUE	YFL032W		strong_peak	any_peak_overlap
IG_1743_genes-complement	chr06	76147	76830	chr06	76773	78072	+	tandemW	1743	sgd	gene	gene_id YFL030W; gene_name AGX1; gene_source sgd; gene_biotype protein_coding;	1	684	tandem	TRUE	TRUE	YFL030W	AGX1	mild_peak	any_peak_overlap
IG_1745_genes-complement	chr06	79161	79343	chr06	77980	79196	-	tandemC	1745	sgd	gene	gene_id YFL029C; gene_name CAK1; gene_source sgd; gene_biotype protein_coding;	-1	183	tandem	TRUE	TRUE	YFL029C	CAK1	no_peak_overlap	no_peak_overlap
IG_1746_genes-complement	chr06	80213	80418	chr06	79267	80240	-	tandemC	1746	sgd	gene	gene_id YFL028C; gene_name CAF16; gene_source sgd; gene_biotype protein_coding;	-1	206	tandem	TRUE	TRUE	YFL028C	CAF16	no_peak_overlap	no_peak_overlap
IG_1747_genes-complement	chr06	81912	82579	chr06	80344	81927	-	divergent	1747	sgd	gene	gene_id YFL027C; gene_name GYP8; gene_source sgd; gene_biotype protein_coding;	-1	668	divergent	TRUE	TRUE	YFL027C	GYP8	no_peak_overlap	no_peak_overlap
IG_1747_genes-complement	chr06	81912	82579	chr06	82540	84065	+	divergent	1747	sgd	gene	gene_id YFL026W; gene_name STE2; gene_source sgd; gene_biotype protein_coding;	1	668	divergent	TRUE	TRUE	YFL026W	STE2	no_peak_overlap	no_peak_overlap
IG_1749_genes-complement	chr06	87234	87846	chr06	83968	87310	-	tandemC	1749	sgd	gene	gene_id YFL025C; gene_name BST1; gene_source sgd; gene_biotype protein_coding;	-1	613	tandem	TRUE	TRUE	YFL025C	BST1	no_peak_overlap	no_peak_overlap
IG_175_genes-complement	chr02	153610	153847	chr02	151433	153687	-	tandemC	175	sgd	gene	gene_id YBL035C; gene_name POL12; gene_source sgd; gene_biotype protein_coding;	-1	238	tandem	TRUE	TRUE	YBL035C	POL12	no_peak_overlap	no_peak_overlap
IG_1750_genes-complement	chr06	90345	90985	chr06	87698	90420	-	divergent	1750	sgd	gene	gene_id YFL024C; gene_name EPL1; gene_source sgd; gene_biotype protein_coding;	-1	641	divergent	TRUE	TRUE	YFL024C	EPL1	strong_peak	any_peak_overlap
IG_1750_genes-complement	chr06	90345	90985	chr06	90972	93473	+	divergent	1750	sgd	gene	gene_id YFL023W; gene_name BUD27; gene_source sgd; gene_biotype protein_coding;	1	641	divergent	TRUE	TRUE	YFL023W	BUD27	strong_peak	any_peak_overlap
IG_1752_genes-complement	chr06	95010	95760	chr06	93390	95069	-	tandemC	1752	sgd	gene	gene_id YFL022C; gene_name FRS2; gene_source sgd; gene_biotype protein_coding;	-1	751	tandem	TRUE	TRUE	YFL022C	FRS2	strong_peak	any_peak_overlap
IG_1754_genes-complement	chr06	99599	100251	chr06	99095	99656	-	tandemC	1754	sgd	gene	gene_id YFL020C; gene_name PAU5; gene_source sgd; gene_biotype protein_coding;	-1	653	tandem	TRUE	TRUE	YFL020C	PAU5	no_peak_overlap	no_peak_overlap
IG_1755_genes-complement	chr06	100605	101627	chr06	100252	100605	-	tandemC	1755	sgd	gene	gene_id YFL019C; gene_source sgd; gene_biotype protein_coding;	-1	1023	tandem	FALSE	TRUE	YFL019C		no_peak_overlap	no_peak_overlap
IG_1756_genes-complement	chr06	103127	103698	chr06	101554	103206	-	divergent	1756	sgd	gene	gene_id YFL018C; gene_name LPD1; gene_source sgd; gene_biotype protein_coding;	-1	572	divergent	TRUE	TRUE	YFL018C	LPD1	no_peak_overlap	no_peak_overlap
IG_1756_genes-complement	chr06	103127	103698	chr06	103659	103997	+	divergent	1756	sgd	gene	gene_id YFL017W-A; gene_name SMX2; gene_source sgd; gene_biotype protein_coding;	1	572	divergent	TRUE	TRUE	YFL017W-A	SMX2	no_peak_overlap	no_peak_overlap
IG_1758_genes-complement	chr06	104462	104700	chr06	103867	104487	-	tandemC	1758	sgd	gene	gene_id YFL017C; gene_name GNA1; gene_source sgd; gene_biotype protein_coding;	-1	239	tandem	TRUE	TRUE	YFL017C	GNA1	no_peak_overlap	no_peak_overlap
IG_1759_genes-complement	chr06	106236	106414	chr06	106415	106732	+	divergent	1759	sgd	gene	gene_id YFL015W-A; gene_source sgd; gene_biotype protein_coding;	1	179	divergent	FALSE	TRUE	YFL015W-A		strong_peak	any_peak_overlap
IG_1759_genes-complement	chr06	106236	106414	chr06	104592	106280	-	divergent	1759	sgd	gene	gene_id YFL016C; gene_name MDJ1; gene_source sgd; gene_biotype protein_coding;	-1	179	divergent	TRUE	TRUE	YFL016C	MDJ1	strong_peak	any_peak_overlap
IG_176_genes-complement	chr02	158389	158655	chr02	153676	158453	-	tandemC	176	sgd	gene	gene_id YBL034C; gene_name STU1; gene_source sgd; gene_biotype protein_coding;	-1	267	tandem	TRUE	TRUE	YBL034C	STU1	strong_peak	any_peak_overlap
IG_1760_genes-complement	chr06	106963	107255	chr06	106469	106963	-	divergent	1760	sgd	gene	gene_id YFL015C; gene_source sgd; gene_biotype protein_coding;	-1	293	divergent	FALSE	TRUE	YFL015C		strong_peak	any_peak_overlap
IG_1760_genes-complement	chr06	106963	107255	chr06	107195	107764	+	divergent	1760	sgd	gene	gene_id YFL014W; gene_name HSP12; gene_source sgd; gene_biotype protein_coding;	1	293	divergent	TRUE	TRUE	YFL014W	HSP12	strong_peak	any_peak_overlap
IG_1761_genes-complement	chr06	107585	107798	chr06	107799	108602	+	tandemW	1761	sgd	gene	gene_id YFL013W-A; gene_source sgd; gene_biotype protein_coding;	1	214	tandem	FALSE	TRUE	YFL013W-A		strong_peak	any_peak_overlap
IG_1762_genes-complement	chr06	110184	110646	chr06	110582	111243	+	tandemW	1762	sgd	gene	gene_id YFL012W; gene_source sgd; gene_biotype protein_coding;	1	463	tandem	TRUE	TRUE	YFL012W		no_peak_overlap	no_peak_overlap
IG_1763_genes-complement	chr06	111093	112344	chr06	112318	114046	+	tandemW	1763	sgd	gene	gene_id YFL011W; gene_name HXT10; gene_source sgd; gene_biotype protein_coding;	1	1252	tandem	TRUE	TRUE	YFL011W	HXT10	no_peak_overlap	no_peak_overlap
IG_1764_genes-complement	chr06	113985	114989	chr06	114990	115274	+	tandemW	1764	sgd	gene	gene_id YFL010W-A; gene_name AUA1; gene_source sgd; gene_biotype protein_coding;	1	1005	tandem	FALSE	TRUE	YFL010W-A	AUA1	mild_peak	any_peak_overlap
IG_1765_genes-complement	chr06	115743	116144	chr06	114941	115770	-	divergent	1765	sgd	gene	gene_id YFL010C; gene_name WWM1; gene_source sgd; gene_biotype protein_coding;	-1	402	divergent	TRUE	TRUE	YFL010C	WWM1	mild_peak	any_peak_overlap
IG_1765_genes-complement	chr06	115743	116144	chr06	116088	118571	+	divergent	1765	sgd	gene	gene_id YFL009W; gene_name CDC4; gene_source sgd; gene_biotype protein_coding;	1	402	divergent	TRUE	TRUE	YFL009W	CDC4	mild_peak	any_peak_overlap
IG_1766_genes-complement	chr06	118484	119428	chr06	119330	123198	+	tandemW	1766	sgd	gene	gene_id YFL008W; gene_name SMC1; gene_source sgd; gene_biotype protein_coding;	1	945	tandem	TRUE	TRUE	YFL008W	SMC1	no_peak_overlap	no_peak_overlap
IG_1767_genes-complement	chr06	123106	123478	chr06	123350	129979	+	tandemW	1767	sgd	gene	gene_id YFL007W; gene_name BLM10; gene_source sgd; gene_biotype protein_coding;	1	373	tandem	TRUE	TRUE	YFL007W	BLM10	no_peak_overlap	no_peak_overlap
IG_1768_genes-complement	chr06	129910	130333	chr06	130208	131188	+	tandemW	1768	sgd	gene	gene_id YFL005W; gene_name SEC4; gene_source sgd; gene_biotype protein_coding;	1	424	tandem	TRUE	TRUE	YFL005W	SEC4	mild_peak	any_peak_overlap
IG_1769_genes-complement	chr06	130981	131809	chr06	131771	134423	+	tandemW	1769	sgd	gene	gene_id YFL004W; gene_name VTC2; gene_source sgd; gene_biotype protein_coding;	1	829	tandem	TRUE	TRUE	YFL004W	VTC2	mild_peak	any_peak_overlap
IG_177_genes-complement	chr02	159693	160183	chr02	160095	161515	+	divergent	177	sgd	gene	gene_id YBL032W; gene_name HEK2; gene_source sgd; gene_biotype protein_coding;	1	491	divergent	TRUE	TRUE	YBL032W	HEK2	strong_peak	any_peak_overlap
IG_177_genes-complement	chr02	159693	160183	chr02	158583	159720	-	divergent	177	sgd	gene	gene_id YBL033C; gene_name RIB1; gene_source sgd; gene_biotype protein_coding;	-1	491	divergent	TRUE	TRUE	YBL033C	RIB1	strong_peak	any_peak_overlap
IG_1771_genes-complement	chr06	137157	145113	chr06	134360	137231	-	tandemC	1771	sgd	gene	gene_id YFL003C; gene_name MSH4; gene_source sgd; gene_biotype protein_coding;	-1	7957	tandem	TRUE	TRUE	YFL003C	MSH4	mild_peak	any_peak_overlap
IG_1772_genes-complement	chr06	146934	147130	chr06	144974	146955	-	divergent	1772	sgd	gene	gene_id YFL002C; gene_name SPB4; gene_source sgd; gene_biotype protein_coding;	-1	197	divergent	TRUE	TRUE	YFL002C	SPB4	no_peak_overlap	no_peak_overlap
IG_1772_genes-complement	chr06	146934	147130	chr06	147117	148485	+	divergent	1772	sgd	gene	gene_id YFL001W; gene_name DEG1; gene_source sgd; gene_biotype protein_coding;	1	197	divergent	TRUE	TRUE	YFL001W	DEG1	no_peak_overlap	no_peak_overlap
IG_1773_genes-complement	chr06	148459	149109	chr06	149073	149795	+	tandemW	1773	sgd	gene	gene_id YFR001W; gene_name LOC1; gene_source sgd; gene_biotype protein_coding;	1	651	tandem	TRUE	TRUE	YFR001W	LOC1	mild_peak	any_peak_overlap
IG_1774_genes-complement	chr06	149724	150015	chr06	149999	152618	+	tandemW	1774	sgd	gene	gene_id YFR002W; gene_name NIC96; gene_source sgd; gene_biotype protein_coding;	1	292	tandem	TRUE	TRUE	YFR002W	NIC96	mild_peak	any_peak_overlap
IG_1776_genes-complement	chr06	153124	153392	chr06	152503	153172	-	divergent	1776	sgd	gene	gene_id YFR003C; gene_name YPI1; gene_source sgd; gene_biotype protein_coding;	-1	269	divergent	TRUE	TRUE	YFR003C	YPI1	no_peak_overlap	no_peak_overlap
IG_1776_genes-complement	chr06	153124	153392	chr06	153353	154384	+	divergent	1776	sgd	gene	gene_id YFR004W; gene_name RPN11; gene_source sgd; gene_biotype protein_coding;	1	269	divergent	TRUE	TRUE	YFR004W	RPN11	no_peak_overlap	no_peak_overlap
IG_1778_genes-complement	chr06	155873	156144	chr06	154314	155906	-	divergent	1778	sgd	gene	gene_id YFR005C; gene_name SAD1; gene_source sgd; gene_biotype protein_coding;	-1	272	divergent	TRUE	TRUE	YFR005C	SAD1	no_peak_overlap	no_peak_overlap
IG_1778_genes-complement	chr06	155873	156144	chr06	156115	157832	+	divergent	1778	sgd	gene	gene_id YFR006W; gene_source sgd; gene_biotype protein_coding;	1	272	divergent	TRUE	TRUE	YFR006W		no_peak_overlap	no_peak_overlap
IG_1779_genes-complement	chr06	157752	159298	chr06	159256	160414	+	tandemW	1779	sgd	gene	gene_id YFR007W; gene_name YFH7; gene_source sgd; gene_biotype protein_coding;	1	1547	tandem	TRUE	TRUE	YFR007W	YFH7	mild_peak	any_peak_overlap
IG_178_genes-complement	chr02	161329	161698	chr02	161674	162911	+	tandemW	178	sgd	gene	gene_id YBL031W; gene_name SHE1; gene_source sgd; gene_biotype protein_coding;	1	370	tandem	TRUE	TRUE	YBL031W	SHE1	no_peak_overlap	no_peak_overlap
IG_1780_genes-complement	chr06	160360	160534	chr06	160535	161200	+	tandemW	1780	sgd	gene	gene_id YFR008W; gene_name FAR7; gene_source sgd; gene_biotype protein_coding;	1	175	tandem	FALSE	TRUE	YFR008W	FAR7	no_peak_overlap	no_peak_overlap
IG_1781_genes-complement	chr06	161200	162487	chr06	162428	164822	+	tandemW	1781	sgd	gene	gene_id YFR009W; gene_name GCN20; gene_source sgd; gene_biotype protein_coding;	1	1288	tandem	TRUE	TRUE	YFR009W	GCN20	no_peak_overlap	no_peak_overlap
IG_1782_genes-complement	chr06	164746	165066	chr06	165004	166653	+	tandemW	1782	sgd	gene	gene_id YFR010W; gene_name UBP6; gene_source sgd; gene_biotype protein_coding;	1	321	tandem	TRUE	TRUE	YFR010W	UBP6	no_peak_overlap	no_peak_overlap
IG_1783_genes-complement	chr06	166566	166727	chr06	166608	167007	+	tandemW	1783	sgd	gene	gene_id YFR010W-A; gene_source sgd; gene_biotype protein_coding;	1	162	tandem	TRUE	TRUE	YFR010W-A		no_peak_overlap	no_peak_overlap
IG_1784_genes-complement	chr06	167258	167887	chr06	166577	167290	-	divergent	1784	sgd	gene	gene_id YFR011C; gene_source sgd; gene_biotype protein_coding;	-1	630	divergent	TRUE	TRUE	YFR011C		no_peak_overlap	no_peak_overlap
IG_1784_genes-complement	chr06	167258	167887	chr06	167888	168496	+	divergent	1784	sgd	gene	gene_id YFR012W; gene_name DCV1; gene_source sgd; gene_biotype protein_coding;	1	630	divergent	FALSE	TRUE	YFR012W	DCV1	no_peak_overlap	no_peak_overlap
IG_1785_genes-complement	chr06	168496	169223	chr06	169142	169515	+	tandemW	1785	sgd	gene	gene_id YFR012W-A; gene_source sgd; gene_biotype protein_coding;	1	728	tandem	TRUE	TRUE	YFR012W-A		no_peak_overlap	no_peak_overlap
IG_1786_genes-complement	chr06	169310	169921	chr06	169870	172410	+	tandemW	1786	sgd	gene	gene_id YFR013W; gene_name IOC3; gene_source sgd; gene_biotype protein_coding;	1	612	tandem	TRUE	TRUE	YFR013W	IOC3	no_peak_overlap	no_peak_overlap
IG_1788_genes-complement	chr06	173877	174264	chr06	172329	173931	-	tandemC	1788	sgd	gene	gene_id YFR014C; gene_name CMK1; gene_source sgd; gene_biotype protein_coding;	-1	388	tandem	TRUE	TRUE	YFR014C	CMK1	no_peak_overlap	no_peak_overlap
IG_1789_genes-complement	chr06	176391	177041	chr06	174114	176471	-	tandemC	1789	sgd	gene	gene_id YFR015C; gene_name GSY1; gene_source sgd; gene_biotype protein_coding;	-1	651	tandem	TRUE	TRUE	YFR015C	GSY1	mild_peak	any_peak_overlap
IG_1790_genes-complement	chr06	180743	182273	chr06	176979	180827	-	tandemC	1790	sgd	gene	gene_id YFR016C; gene_source sgd; gene_biotype protein_coding;	-1	1531	tandem	TRUE	TRUE	YFR016C		mild_peak	any_peak_overlap
IG_1791_genes-complement	chr06	182861	183130	chr06	182170	182941	-	tandemC	1791	sgd	gene	gene_id YFR017C; gene_name IGD1; gene_source sgd; gene_biotype protein_coding;	-1	270	tandem	TRUE	TRUE	YFR017C	IGD1	strong_peak	any_peak_overlap
IG_1792_genes-complement	chr06	184222	184501	chr06	182955	184277	-	divergent	1792	sgd	gene	gene_id YFR018C; gene_source sgd; gene_biotype protein_coding;	-1	280	divergent	TRUE	TRUE	YFR018C		no_peak_overlap	no_peak_overlap
IG_1792_genes-complement	chr06	184222	184501	chr06	184480	191387	+	divergent	1792	sgd	gene	gene_id YFR019W; gene_name FAB1; gene_source sgd; gene_biotype protein_coding;	1	280	divergent	TRUE	TRUE	YFR019W	FAB1	no_peak_overlap	no_peak_overlap
IG_1793_genes-complement	chr06	191338	192736	chr06	192622	193562	+	tandemW	1793	sgd	gene	gene_id YFR020W; gene_name CSS2; gene_source sgd; gene_biotype protein_coding;	1	1399	tandem	TRUE	TRUE	YFR020W	CSS2	mild_peak	any_peak_overlap
IG_1794_genes-complement	chr06	193435	194811	chr06	194723	196409	+	tandemW	1794	sgd	gene	gene_id YFR021W; gene_name ATG18; gene_source sgd; gene_biotype protein_coding;	1	1377	tandem	TRUE	TRUE	YFR021W	ATG18	no_peak_overlap	no_peak_overlap
IG_1795_genes-complement	chr06	196314	196832	chr06	196804	199153	+	tandemW	1795	sgd	gene	gene_id YFR022W; gene_name ROG3; gene_source sgd; gene_biotype protein_coding;	1	519	tandem	TRUE	TRUE	YFR022W	ROG3	no_peak_overlap	no_peak_overlap
IG_1796_genes-complement	chr06	199034	199873	chr06	199810	201857	+	tandemW	1796	sgd	gene	gene_id YFR023W; gene_name PES4; gene_source sgd; gene_biotype protein_coding;	1	840	tandem	TRUE	TRUE	YFR023W	PES4	no_peak_overlap	no_peak_overlap
IG_1798_genes-complement	chr06	203433	203742	chr06	201759	203455	-	tandemC	1798	sgd	gene	gene_id YFR024C-A; gene_name LSB3; gene_source sgd; gene_biotype protein_coding;	-1	310	tandem	TRUE	TRUE	YFR024C-A	LSB3	no_peak_overlap	no_peak_overlap
IG_1799_genes-complement	chr06	204750	205747	chr06	203627	204782	-	tandemC	1799	sgd	gene	gene_id YFR025C; gene_name HIS2; gene_source sgd; gene_biotype protein_coding;	-1	998	tandem	TRUE	TRUE	YFR025C	HIS2	no_peak_overlap	no_peak_overlap
IG_18_genes-complement	chr01	41901	42176	chr01	42161	42797	+	tandemW	18	sgd	gene	gene_id YAL055W; gene_name PEX22; gene_source sgd; gene_biotype protein_coding;	1	276	tandem	TRUE	TRUE	YAL055W	PEX22	no_peak_overlap	no_peak_overlap
IG_180_genes-complement	chr02	163997	164487	chr02	162911	164122	-	tandemC	180	sgd	gene	gene_id YBL030C; gene_name PET9; gene_source sgd; gene_biotype protein_coding;	-1	491	tandem	TRUE	TRUE	YBL030C	PET9	strong_peak	any_peak_overlap
IG_1800_genes-complement	chr06	206257	207451	chr06	205657	206305	-	divergent	1800	sgd	gene	gene_id YFR026C; gene_name ULI1; gene_source sgd; gene_biotype protein_coding;	-1	1195	divergent	TRUE	TRUE	YFR026C	ULI1	no_peak_overlap	no_peak_overlap
IG_1800_genes-complement	chr06	206257	207451	chr06	207380	208410	+	divergent	1800	sgd	gene	gene_id YFR027W; gene_name ECO1; gene_source sgd; gene_biotype protein_coding;	1	1195	divergent	TRUE	TRUE	YFR027W	ECO1	no_peak_overlap	no_peak_overlap
IG_1802_genes-complement	chr06	210068	210936	chr06	210871	213018	+	divergent	1802	sgd	gene	gene_id YFR029W; gene_name PTR3; gene_source sgd; gene_biotype protein_coding;	1	869	divergent	TRUE	TRUE	YFR029W	PTR3	mild_peak	any_peak_overlap
IG_1802_genes-complement	chr06	210068	210936	chr06	208341	210121	-	divergent	1802	sgd	gene	gene_id YFR028C; gene_name CDC14; gene_source sgd; gene_biotype protein_coding;	-1	869	divergent	TRUE	TRUE	YFR028C	CDC14	mild_peak	any_peak_overlap
IG_1803_genes-complement	chr06	212973	213311	chr06	213250	216465	+	tandemW	1803	sgd	gene	gene_id YFR030W; gene_name MET10; gene_source sgd; gene_biotype protein_coding;	1	339	tandem	TRUE	TRUE	YFR030W	MET10	no_peak_overlap	no_peak_overlap
IG_1805_genes-complement	chr06	220106	220506	chr06	216522	220147	-	tandemC	1805	sgd	gene	gene_id YFR031C; gene_name SMC2; gene_source sgd; gene_biotype protein_coding;	-1	401	tandem	TRUE	TRUE	YFR031C	SMC2	no_peak_overlap	no_peak_overlap
IG_1806_genes-complement	chr06	221418	222089	chr06	220363	221467	-	tandemC	1806	sgd	gene	gene_id YFR031C-A; gene_name RPL2A; gene_source sgd; gene_biotype protein_coding;	-1	672	tandem	TRUE	TRUE	YFR031C-A	RPL2A	mild_peak	any_peak_overlap
IG_1807_genes-complement	chr06	222959	223257	chr06	221983	223041	-	tandemC	1807	sgd	gene	gene_id YFR032C; gene_name RRT5; gene_source sgd; gene_biotype protein_coding;	-1	299	tandem	TRUE	TRUE	YFR032C	RRT5	no_peak_overlap	no_peak_overlap
IG_1808_genes-complement	chr06	223437	223709	chr06	223148	223817	-	tandemC	1808	sgd	gene	gene_id YFR032C-A; gene_name RPL29; gene_source sgd; gene_biotype protein_coding;	-1	273	tandem	TRUE	TRUE	YFR032C-A	RPL29	strong_peak	any_peak_overlap
IG_1808_genes-complement	chr06	223437	223709	chr06	223148	223817	-	tandemC	1808	sgd	gene	gene_id YFR032C-A; gene_name RPL29; gene_source sgd; gene_biotype protein_coding;	-1	273	tandem	TRUE	TRUE	YFR032C-A	RPL29	mild_peak	any_peak_overlap
IG_1809_genes-complement	chr06	223973	224325	chr06	223668	224022	-	tandemC	1809	sgd	gene	gene_id YFR032C-B; gene_source sgd; gene_biotype protein_coding;	-1	353	tandem	TRUE	TRUE	YFR032C-B		strong_peak	any_peak_overlap
IG_181_genes-complement	chr02	164772	166133	chr02	164379	164844	-	divergent	181	sgd	gene	gene_id YBL029C-A; gene_source sgd; gene_biotype protein_coding;	-1	1362	divergent	TRUE	TRUE	YBL029C-A		strong_peak	any_peak_overlap
IG_181_genes-complement	chr02	164772	166133	chr02	166087	167386	+	divergent	181	sgd	gene	gene_id YBL029W; gene_source sgd; gene_biotype protein_coding;	1	1362	divergent	TRUE	TRUE	YBL029W		strong_peak	any_peak_overlap
IG_1810_genes-complement	chr06	224769	225019	chr06	224171	224874	-	tandemC	1810	sgd	gene	gene_id YFR033C; gene_name QCR6; gene_source sgd; gene_biotype protein_coding;	-1	251	tandem	TRUE	TRUE	YFR033C	QCR6	strong_peak	any_peak_overlap
IG_1811_genes-complement	chr06	225958	226021	chr06	224785	225986	-	divergent	1811	sgd	gene	gene_id YFR034C; gene_name PHO4; gene_source sgd; gene_biotype protein_coding;	-1	64	divergent	TRUE	TRUE	YFR034C	PHO4	strong_peak	any_peak_overlap
IG_1811_genes-complement	chr06	225958	226021	chr06	225932	226476	+	divergent	1811	sgd	gene	gene_id YFR034W-A; gene_source sgd; gene_biotype protein_coding;	1	64	divergent	TRUE	TRUE	YFR034W-A		strong_peak	any_peak_overlap
IG_1812_genes-complement	chr06	226465	226962	chr06	226932	227457	+	divergent	1812	sgd	gene	gene_id YFR036W; gene_name CDC26; gene_source sgd; gene_biotype protein_coding;	1	498	divergent	TRUE	TRUE	YFR036W	CDC26	strong_peak	any_peak_overlap
IG_1812_genes-complement	chr06	226465	226962	chr06	226121	226465	-	divergent	1812	sgd	gene	gene_id YFR035C; gene_source sgd; gene_biotype protein_coding;	-1	498	divergent	FALSE	TRUE	YFR035C		strong_peak	any_peak_overlap
IG_1813_genes-complement	chr06	227337	227450	chr06	227451	228101	+	tandemW	1813	sgd	gene	gene_id YFR036W-A; gene_source sgd; gene_biotype protein_coding;	1	114	tandem	FALSE	TRUE	YFR036W-A		no_peak_overlap	no_peak_overlap
IG_1814_genes-complement	chr06	229186	229379	chr06	227390	229204	-	divergent	1814	sgd	gene	gene_id YFR037C; gene_name RSC8; gene_source sgd; gene_biotype protein_coding;	-1	194	divergent	TRUE	TRUE	YFR037C	RSC8	no_peak_overlap	no_peak_overlap
IG_1814_genes-complement	chr06	229186	229379	chr06	229363	232018	+	divergent	1814	sgd	gene	gene_id YFR038W; gene_name IRC5; gene_source sgd; gene_biotype protein_coding;	1	194	divergent	TRUE	TRUE	YFR038W	IRC5	no_peak_overlap	no_peak_overlap
IG_1816_genes-complement	chr06	233544	234241	chr06	234177	237331	+	divergent	1816	sgd	gene	gene_id YFR040W; gene_name SAP155; gene_source sgd; gene_biotype protein_coding;	1	698	divergent	TRUE	TRUE	YFR040W	SAP155	strong_peak	any_peak_overlap
IG_1816_genes-complement	chr06	233544	234241	chr06	231934	233629	-	divergent	1816	sgd	gene	gene_id YFR039C; gene_name OSW7; gene_source sgd; gene_biotype protein_coding;	-1	698	divergent	TRUE	TRUE	YFR039C	OSW7	strong_peak	any_peak_overlap
IG_1818_genes-complement	chr06	238255	238457	chr06	237226	238278	-	divergent	1818	sgd	gene	gene_id YFR041C; gene_name ERJ5; gene_source sgd; gene_biotype protein_coding;	-1	203	divergent	TRUE	TRUE	YFR041C	ERJ5	no_peak_overlap	no_peak_overlap
IG_1818_genes-complement	chr06	238255	238457	chr06	238416	239143	+	divergent	1818	sgd	gene	gene_id YFR042W; gene_name KEG1; gene_source sgd; gene_biotype protein_coding;	1	203	divergent	TRUE	TRUE	YFR042W	KEG1	no_peak_overlap	no_peak_overlap
IG_1820_genes-complement	chr06	239827	239991	chr06	239034	239865	-	tandemC	1820	sgd	gene	gene_id YFR043C; gene_name IRC6; gene_source sgd; gene_biotype protein_coding;	-1	165	tandem	TRUE	TRUE	YFR043C	IRC6	no_peak_overlap	no_peak_overlap
IG_1821_genes-complement	chr06	241437	241997	chr06	239903	241456	-	divergent	1821	sgd	gene	gene_id YFR044C; gene_name DUG1; gene_source sgd; gene_biotype protein_coding;	-1	561	divergent	TRUE	TRUE	YFR044C	DUG1	no_peak_overlap	no_peak_overlap
IG_1821_genes-complement	chr06	241437	241997	chr06	241961	243069	+	divergent	1821	sgd	gene	gene_id YFR045W; gene_source sgd; gene_biotype protein_coding;	1	561	divergent	TRUE	TRUE	YFR045W		no_peak_overlap	no_peak_overlap
IG_1823_genes-complement	chr06	244159	244278	chr06	242982	244163	-	tandemC	1823	sgd	gene	gene_id YFR046C; gene_name CNN1; gene_source sgd; gene_biotype protein_coding;	-1	120	tandem	TRUE	TRUE	YFR046C	CNN1	no_peak_overlap	no_peak_overlap
IG_1824_genes-complement	chr06	245166	246145	chr06	246095	248168	+	divergent	1824	sgd	gene	gene_id YFR048W; gene_name RMD8; gene_source sgd; gene_biotype protein_coding;	1	980	divergent	TRUE	TRUE	YFR048W	RMD8	no_peak_overlap	no_peak_overlap
IG_1824_genes-complement	chr06	245166	246145	chr06	244185	245198	-	divergent	1824	sgd	gene	gene_id YFR047C; gene_name BNA6; gene_source sgd; gene_biotype protein_coding;	-1	980	divergent	TRUE	TRUE	YFR047C	BNA6	no_peak_overlap	no_peak_overlap
IG_1825_genes-complement	chr06	248134	248522	chr06	248416	249004	+	tandemW	1825	sgd	gene	gene_id YFR049W; gene_name YMR31; gene_source sgd; gene_biotype protein_coding;	1	389	tandem	TRUE	TRUE	YFR049W	YMR31	no_peak_overlap	no_peak_overlap
IG_1827_genes-complement	chr06	249866	250162	chr06	248911	249919	-	tandemC	1827	sgd	gene	gene_id YFR050C; gene_name PRE4; gene_source sgd; gene_biotype protein_coding;	-1	297	tandem	TRUE	TRUE	YFR050C	PRE4	no_peak_overlap	no_peak_overlap
IG_1828_genes-complement	chr06	251803	252504	chr06	250075	251842	-	divergent	1828	sgd	gene	gene_id YFR051C; gene_name RET2; gene_source sgd; gene_biotype protein_coding;	-1	702	divergent	TRUE	TRUE	YFR051C	RET2	no_peak_overlap	no_peak_overlap
IG_1828_genes-complement	chr06	251803	252504	chr06	252474	253408	+	divergent	1828	sgd	gene	gene_id YFR052W; gene_name RPN12; gene_source sgd; gene_biotype protein_coding;	1	702	divergent	TRUE	TRUE	YFR052W	RPN12	no_peak_overlap	no_peak_overlap
IG_183_genes-complement	chr02	167838	168422	chr02	168391	169472	+	divergent	183	sgd	gene	gene_id YBL027W; gene_name RPL19B; gene_source sgd; gene_biotype protein_coding;	1	585	divergent	TRUE	TRUE	YBL027W	RPL19B	strong_peak	any_peak_overlap
IG_183_genes-complement	chr02	167838	168422	chr02	167339	167871	-	divergent	183	sgd	gene	gene_id YBL028C; gene_source sgd; gene_biotype protein_coding;	-1	585	divergent	TRUE	TRUE	YBL028C		strong_peak	any_peak_overlap
IG_1830_genes-complement	chr06	255049	258854	chr06	253414	255154	-	tandemC	1830	sgd	gene	gene_id YFR053C; gene_name HXK1; gene_source sgd; gene_biotype protein_coding;	-1	3806	tandem	TRUE	TRUE	YFR053C	HXK1	strong_peak	any_peak_overlap
IG_1831_genes-complement	chr06	259433	263956	chr06	258752	259519	-	tandemC	1831	sgd	gene	gene_id YFR054C; gene_source sgd; gene_biotype protein_coding;	-1	4524	tandem	TRUE	TRUE	YFR054C		no_peak_overlap	no_peak_overlap
IG_1832_genes-complement	chr06	265226	269060	chr06	269061	269516	+	tandemW	1832	sgd	gene	gene_id YFR057W; gene_source sgd; gene_biotype protein_coding;	1	3835	tandem	FALSE	TRUE	YFR057W		no_peak_overlap	no_peak_overlap
IG_1835_genes-complement	chr07	3932	5311	chr07	5238	5975	+	tandemW	1835	sgd	gene	gene_id YGL262W; gene_source sgd; gene_biotype protein_coding;	1	1380	tandem	TRUE	TRUE	YGL262W		no_peak_overlap	no_peak_overlap
IG_1837_genes-complement	chr07	6652	6859	chr07	6290	6652	-	divergent	1837	sgd	gene	gene_id YGL261C; gene_name PAU11; gene_source sgd; gene_biotype protein_coding;	-1	208	divergent	FALSE	TRUE	YGL261C	PAU11	no_peak_overlap	no_peak_overlap
IG_1837_genes-complement	chr07	6652	6859	chr07	6860	7090	+	divergent	1837	sgd	gene	gene_id YGL260W; gene_source sgd; gene_biotype protein_coding;	1	208	divergent	FALSE	TRUE	YGL260W		no_peak_overlap	no_peak_overlap
IG_1838_genes-complement	chr07	7090	8469	chr07	8470	8967	+	tandemW	1838	sgd	gene	gene_id YGL259W; gene_name YPS5; gene_source sgd; gene_biotype protein_coding;	1	1380	tandem	FALSE	TRUE	YGL259W	YPS5	no_peak_overlap	no_peak_overlap
IG_1839_genes-complement	chr07	8967	9161	chr07	9162	9395	+	tandemW	1839	sgd	gene	gene_id YGL258W-A; gene_source sgd; gene_biotype protein_coding;	1	195	tandem	FALSE	TRUE	YGL258W-A		no_peak_overlap	no_peak_overlap
IG_184_genes-complement	chr02	169376	170622	chr02	170565	171169	+	tandemW	184	sgd	gene	gene_id YBL026W; gene_name LSM2; gene_source sgd; gene_biotype protein_coding;	1	1247	tandem	TRUE	TRUE	YBL026W	LSM2	no_peak_overlap	no_peak_overlap
IG_1840_genes-complement	chr07	9395	11109	chr07	11063	11966	+	tandemW	1840	sgd	gene	gene_id YGL258W; gene_name VEL1; gene_source sgd; gene_biotype protein_coding;	1	1715	tandem	TRUE	TRUE	YGL258W	VEL1	no_peak_overlap	no_peak_overlap
IG_1842_genes-complement	chr07	14157	15158	chr07	12364	14264	-	divergent	1842	sgd	gene	gene_id YGL257C; gene_name MNT2; gene_source sgd; gene_biotype protein_coding;	-1	1002	divergent	TRUE	TRUE	YGL257C	MNT2	no_peak_overlap	no_peak_overlap
IG_1842_genes-complement	chr07	14157	15158	chr07	15055	16486	+	divergent	1842	sgd	gene	gene_id YGL256W; gene_name ADH4; gene_source sgd; gene_biotype protein_coding;	1	1002	divergent	TRUE	TRUE	YGL256W	ADH4	no_peak_overlap	no_peak_overlap
IG_1843_genes-complement	chr07	16307	20977	chr07	20931	22203	+	tandemW	1843	sgd	gene	gene_id YGL255W; gene_name ZRT1; gene_source sgd; gene_biotype protein_coding;	1	4671	tandem	TRUE	TRUE	YGL255W	ZRT1	strong_peak	any_peak_overlap
IG_1844_genes-complement	chr07	22108	22303	chr07	22286	23368	+	tandemW	1844	sgd	gene	gene_id YGL254W; gene_name FZF1; gene_source sgd; gene_biotype protein_coding;	1	196	tandem	TRUE	TRUE	YGL254W	FZF1	mild_peak	any_peak_overlap
IG_1845_genes-complement	chr07	23203	23934	chr07	23886	25588	+	tandemW	1845	sgd	gene	gene_id YGL253W; gene_name HXK2; gene_source sgd; gene_biotype protein_coding;	1	732	tandem	TRUE	TRUE	YGL253W	HXK2	mild_peak	any_peak_overlap
IG_1847_genes-complement	chr07	27484	27920	chr07	25617	27520	-	tandemC	1847	sgd	gene	gene_id YGL252C; gene_name RTG2; gene_source sgd; gene_biotype protein_coding;	-1	437	tandem	TRUE	TRUE	YGL252C	RTG2	mild_peak	any_peak_overlap
IG_1848_genes-complement	chr07	31636	31909	chr07	31881	32839	+	divergent	1848	sgd	gene	gene_id YGL250W; gene_name RMR1; gene_source sgd; gene_biotype protein_coding;	1	274	divergent	TRUE	TRUE	YGL250W	RMR1	no_peak_overlap	no_peak_overlap
IG_1848_genes-complement	chr07	31636	31909	chr07	27715	31725	-	divergent	1848	sgd	gene	gene_id YGL251C; gene_name HFM1; gene_source sgd; gene_biotype protein_coding;	-1	274	divergent	TRUE	TRUE	YGL251C	HFM1	no_peak_overlap	no_peak_overlap
IG_1849_genes-complement	chr07	32635	33097	chr07	33027	35387	+	tandemW	1849	sgd	gene	gene_id YGL249W; gene_name ZIP2; gene_source sgd; gene_biotype protein_coding;	1	463	tandem	TRUE	TRUE	YGL249W	ZIP2	no_peak_overlap	no_peak_overlap
IG_185_genes-complement	chr02	171038	171480	chr02	171430	172143	+	tandemW	185	sgd	gene	gene_id YBL025W; gene_name RRN10; gene_source sgd; gene_biotype protein_coding;	1	443	tandem	TRUE	TRUE	YBL025W	RRN10	no_peak_overlap	no_peak_overlap
IG_1850_genes-complement	chr07	35212	35652	chr07	35558	36820	+	tandemW	1850	sgd	gene	gene_id YGL248W; gene_name PDE1; gene_source sgd; gene_biotype protein_coding;	1	441	tandem	TRUE	TRUE	YGL248W	PDE1	no_peak_overlap	no_peak_overlap
IG_1851_genes-complement	chr07	36762	36932	chr07	36919	37629	+	tandemW	1851	sgd	gene	gene_id YGL247W; gene_name BRR6; gene_source sgd; gene_biotype protein_coding;	1	171	tandem	TRUE	TRUE	YGL247W	BRR6	no_peak_overlap	no_peak_overlap
IG_1853_genes-complement	chr07	38780	39022	chr07	37486	38815	-	divergent	1853	sgd	gene	gene_id YGL246C; gene_name RAI1; gene_source sgd; gene_biotype protein_coding;	-1	243	divergent	TRUE	TRUE	YGL246C	RAI1	no_peak_overlap	no_peak_overlap
IG_1853_genes-complement	chr07	38780	39022	chr07	39002	41211	+	divergent	1853	sgd	gene	gene_id YGL245W; gene_name GUS1; gene_source sgd; gene_biotype protein_coding;	1	243	divergent	TRUE	TRUE	YGL245W	GUS1	no_peak_overlap	no_peak_overlap
IG_1854_genes-complement	chr07	41149	41497	chr07	41448	43260	+	tandemW	1854	sgd	gene	gene_id YGL244W; gene_name RTF1; gene_source sgd; gene_biotype protein_coding;	1	349	tandem	TRUE	TRUE	YGL244W	RTF1	no_peak_overlap	no_peak_overlap
IG_1855_genes-complement	chr07	43174	43306	chr07	43277	44609	+	tandemW	1855	sgd	gene	gene_id YGL243W; gene_name TAD1; gene_source sgd; gene_biotype protein_coding;	1	133	tandem	TRUE	TRUE	YGL243W	TAD1	no_peak_overlap	no_peak_overlap
IG_1857_genes-complement	chr07	45197	45444	chr07	44488	45250	-	divergent	1857	sgd	gene	gene_id YGL242C; gene_source sgd; gene_biotype protein_coding;	-1	248	divergent	TRUE	TRUE	YGL242C		no_peak_overlap	no_peak_overlap
IG_1857_genes-complement	chr07	45197	45444	chr07	45386	48555	+	divergent	1857	sgd	gene	gene_id YGL241W; gene_name KAP114; gene_source sgd; gene_biotype protein_coding;	1	248	divergent	TRUE	TRUE	YGL241W	KAP114	no_peak_overlap	no_peak_overlap
IG_1858_genes-complement	chr07	48459	48612	chr07	48576	49394	+	tandemW	1858	sgd	gene	gene_id YGL240W; gene_name DOC1; gene_source sgd; gene_biotype protein_coding;	1	154	tandem	TRUE	TRUE	YGL240W	DOC1	no_peak_overlap	no_peak_overlap
IG_186_genes-complement	chr02	171918	172533	chr02	172499	174708	+	tandemW	186	sgd	gene	gene_id YBL024W; gene_name NCL1; gene_source sgd; gene_biotype protein_coding;	1	616	tandem	TRUE	TRUE	YBL024W	NCL1	no_peak_overlap	no_peak_overlap
IG_1861_genes-complement	chr07	53528	53786	chr07	52589	53610	-	tandemC	1861	sgd	gene	gene_id YGL237C; gene_name HAP2; gene_source sgd; gene_biotype protein_coding;	-1	259	tandem	TRUE	TRUE	YGL237C	HAP2	no_peak_overlap	no_peak_overlap
IG_1862_genes-complement	chr07	55815	56481	chr07	56412	58987	+	tandemW	1862	sgd	gene	gene_id YGL234W; gene_name ADE5,7; gene_source sgd; gene_biotype protein_coding;	1	667	tandem	TRUE	TRUE	YGL234W	ADE5,7	no_peak_overlap	no_peak_overlap
IG_1863_genes-complement	chr07	58890	59121	chr07	59066	61931	+	tandemW	1863	sgd	gene	gene_id YGL233W; gene_name SEC15; gene_source sgd; gene_biotype protein_coding;	1	232	tandem	TRUE	TRUE	YGL233W	SEC15	no_peak_overlap	no_peak_overlap
IG_1864_genes-complement	chr07	61854	62074	chr07	62050	63073	+	tandemW	1864	sgd	gene	gene_id YGL232W; gene_name TAN1; gene_source sgd; gene_biotype protein_coding;	1	221	tandem	TRUE	TRUE	YGL232W	TAN1	no_peak_overlap	no_peak_overlap
IG_1866_genes-complement	chr07	63620	63771	chr07	62968	63636	-	tandemC	1866	sgd	gene	gene_id YGL231C; gene_name EMC4; gene_source sgd; gene_biotype protein_coding;	-1	152	tandem	TRUE	TRUE	YGL231C	EMC4	no_peak_overlap	no_peak_overlap
IG_1867_genes-complement	chr07	64215	64502	chr07	63664	64259	-	tandemC	1867	sgd	gene	gene_id YGL230C; gene_source sgd; gene_biotype protein_coding;	-1	288	tandem	TRUE	TRUE	YGL230C		no_peak_overlap	no_peak_overlap
IG_1868_genes-complement	chr07	66959	67597	chr07	64360	67070	-	divergent	1868	sgd	gene	gene_id YGL229C; gene_name SAP4; gene_source sgd; gene_biotype protein_coding;	-1	639	divergent	TRUE	TRUE	YGL229C	SAP4	strong_peak	any_peak_overlap
IG_1868_genes-complement	chr07	66959	67597	chr07	67554	69482	+	divergent	1868	sgd	gene	gene_id YGL228W; gene_name SHE10; gene_source sgd; gene_biotype protein_coding;	1	639	divergent	TRUE	TRUE	YGL228W	SHE10	strong_peak	any_peak_overlap
IG_1869_genes-complement	chr07	69331	69670	chr07	69605	72747	+	tandemW	1869	sgd	gene	gene_id YGL227W; gene_name VID30; gene_source sgd; gene_biotype protein_coding;	1	340	tandem	TRUE	TRUE	YGL227W	VID30	no_peak_overlap	no_peak_overlap
IG_1871_genes-complement	chr07	73158	73339	chr07	72606	73197	-	divergent	1871	sgd	gene	gene_id YGL226C-A; gene_name OST5; gene_source sgd; gene_biotype protein_coding;	-1	182	divergent	TRUE	TRUE	YGL226C-A	OST5	no_peak_overlap	no_peak_overlap
IG_1871_genes-complement	chr07	73158	73339	chr07	73328	73788	+	divergent	1871	sgd	gene	gene_id YGL226W; gene_name MTC3; gene_source sgd; gene_biotype protein_coding;	1	182	divergent	TRUE	TRUE	YGL226W	MTC3	no_peak_overlap	no_peak_overlap
IG_1872_genes-complement	chr07	73711	76893	chr07	76840	78031	+	tandemW	1872	sgd	gene	gene_id YGL225W; gene_name VRG4; gene_source sgd; gene_biotype protein_coding;	1	3183	tandem	TRUE	TRUE	YGL225W	VRG4	mild_peak	any_peak_overlap
IG_1872_genes-complement	chr07	73711	76893	chr07	76840	78031	+	tandemW	1872	sgd	gene	gene_id YGL225W; gene_name VRG4; gene_source sgd; gene_biotype protein_coding;	1	3183	tandem	TRUE	TRUE	YGL225W	VRG4	strong_peak	any_peak_overlap
IG_1874_genes-complement	chr07	78857	79111	chr07	77921	78945	-	tandemC	1874	sgd	gene	gene_id YGL224C; gene_name SDT1; gene_source sgd; gene_biotype protein_coding;	-1	255	tandem	TRUE	TRUE	YGL224C	SDT1	no_peak_overlap	no_peak_overlap
IG_1875_genes-complement	chr07	80365	80658	chr07	78971	80382	-	tandemC	1875	sgd	gene	gene_id YGL223C; gene_name COG1; gene_source sgd; gene_biotype protein_coding;	-1	294	tandem	TRUE	TRUE	YGL223C	COG1	no_peak_overlap	no_peak_overlap
IG_1876_genes-complement	chr07	81186	81425	chr07	80525	81241	-	tandemC	1876	sgd	gene	gene_id YGL222C; gene_name EDC1; gene_source sgd; gene_biotype protein_coding;	-1	240	tandem	TRUE	TRUE	YGL222C	EDC1	mild_peak	any_peak_overlap
IG_1877_genes-complement	chr07	82292	82373	chr07	81340	82306	-	divergent	1877	sgd	gene	gene_id YGL221C; gene_name NIF3; gene_source sgd; gene_biotype protein_coding;	-1	82	divergent	TRUE	TRUE	YGL221C	NIF3	no_peak_overlap	no_peak_overlap
IG_1877_genes-complement	chr07	82292	82373	chr07	82327	82918	+	divergent	1877	sgd	gene	gene_id YGL220W; gene_source sgd; gene_biotype protein_coding;	1	82	divergent	TRUE	TRUE	YGL220W		no_peak_overlap	no_peak_overlap
IG_188_genes-complement	chr02	177526	177873	chr02	174760	177574	-	tandemC	188	sgd	gene	gene_id YBL023C; gene_name MCM2; gene_source sgd; gene_biotype protein_coding;	-1	348	tandem	TRUE	TRUE	YBL023C	MCM2	no_peak_overlap	no_peak_overlap
IG_1880_genes-complement	chr07	87302	87980	chr07	87881	89547	+	tandemW	1880	sgd	gene	gene_id YGL215W; gene_name CLG1; gene_source sgd; gene_biotype protein_coding;	1	679	tandem	TRUE	TRUE	YGL215W	CLG1	no_peak_overlap	no_peak_overlap
IG_1881_genes-complement	chr07	89339	90009	chr07	89927	90655	+	tandemW	1881	sgd	gene	gene_id YGL214W; gene_source sgd; gene_biotype protein_coding;	1	671	tandem	TRUE	TRUE	YGL214W		no_peak_overlap	no_peak_overlap
IG_1882_genes-complement	chr07	91247	91431	chr07	91410	92459	+	divergent	1882	sgd	gene	gene_id YGL212W; gene_name VAM7; gene_source sgd; gene_biotype protein_coding;	1	185	divergent	TRUE	TRUE	YGL212W	VAM7	no_peak_overlap	no_peak_overlap
IG_1882_genes-complement	chr07	91247	91431	chr07	89942	91277	-	divergent	1882	sgd	gene	gene_id YGL213C; gene_name SKI8; gene_source sgd; gene_biotype protein_coding;	-1	185	divergent	TRUE	TRUE	YGL213C	SKI8	no_peak_overlap	no_peak_overlap
IG_1883_genes-complement	chr07	92382	92511	chr07	92491	93698	+	tandemW	1883	sgd	gene	gene_id YGL211W; gene_name NCS6; gene_source sgd; gene_biotype protein_coding;	1	130	tandem	TRUE	TRUE	YGL211W	NCS6	no_peak_overlap	no_peak_overlap
IG_1884_genes-complement	chr07	93591	93791	chr07	93756	94582	+	tandemW	1884	sgd	gene	gene_id YGL210W; gene_name YPT32; gene_source sgd; gene_biotype protein_coding;	1	201	tandem	TRUE	TRUE	YGL210W	YPT32	no_peak_overlap	no_peak_overlap
IG_1885_genes-complement	chr07	94460	95857	chr07	95802	97131	+	tandemW	1885	sgd	gene	gene_id YGL209W; gene_name MIG2; gene_source sgd; gene_biotype protein_coding;	1	1398	tandem	TRUE	TRUE	YGL209W	MIG2	mild_peak	any_peak_overlap
IG_1886_genes-complement	chr07	97006	97337	chr07	97297	98715	+	tandemW	1886	sgd	gene	gene_id YGL208W; gene_name SIP2; gene_source sgd; gene_biotype protein_coding;	1	332	tandem	TRUE	TRUE	YGL208W	SIP2	no_peak_overlap	no_peak_overlap
IG_1887_genes-complement	chr07	98585	98968	chr07	98885	102201	+	tandemW	1887	sgd	gene	gene_id YGL207W; gene_name SPT16; gene_source sgd; gene_biotype protein_coding;	1	384	tandem	TRUE	TRUE	YGL207W	SPT16	no_peak_overlap	no_peak_overlap
IG_1889_genes-complement	chr07	107504	108157	chr07	102327	107589	-	divergent	1889	sgd	gene	gene_id YGL206C; gene_name CHC1; gene_source sgd; gene_biotype protein_coding;	-1	654	divergent	TRUE	TRUE	YGL206C	CHC1	strong_peak	any_peak_overlap
IG_1889_genes-complement	chr07	107504	108157	chr07	108091	110593	+	divergent	1889	sgd	gene	gene_id YGL205W; gene_name POX1; gene_source sgd; gene_biotype protein_coding;	1	654	divergent	TRUE	TRUE	YGL205W	POX1	strong_peak	any_peak_overlap
IG_189_genes-complement	chr02	181275	181659	chr02	177796	181391	-	tandemC	189	sgd	gene	gene_id YBL022C; gene_name PIM1; gene_source sgd; gene_biotype protein_coding;	-1	385	tandem	TRUE	TRUE	YBL022C	PIM1	no_peak_overlap	no_peak_overlap
IG_1891_genes-complement	chr07	112005	112474	chr07	111641	112100	-	tandemC	1891	sgd	gene	gene_id YGL204C; gene_source sgd; gene_biotype protein_coding;	-1	470	tandem	TRUE	TRUE	YGL204C		no_peak_overlap	no_peak_overlap
IG_1892_genes-complement	chr07	114664	116058	chr07	115947	117663	+	divergent	1892	sgd	gene	gene_id YGL202W; gene_name ARO8; gene_source sgd; gene_biotype protein_coding;	1	1395	divergent	TRUE	TRUE	YGL202W	ARO8	mild_peak	any_peak_overlap
IG_1892_genes-complement	chr07	114664	116058	chr07	112401	114730	-	divergent	1892	sgd	gene	gene_id YGL203C; gene_name KEX1; gene_source sgd; gene_biotype protein_coding;	-1	1395	divergent	TRUE	TRUE	YGL203C	KEX1	mild_peak	any_peak_overlap
IG_1894_genes-complement	chr07	120907	122693	chr07	117674	120971	-	tandemC	1894	sgd	gene	gene_id YGL201C; gene_name MCM6; gene_source sgd; gene_biotype protein_coding;	-1	1787	tandem	TRUE	TRUE	YGL201C	MCM6	strong_peak	any_peak_overlap
IG_1895_genes-complement	chr07	123305	123571	chr07	122591	123332	-	tandemC	1895	sgd	gene	gene_id YGL200C; gene_name EMP24; gene_source sgd; gene_biotype protein_coding;	-1	267	tandem	TRUE	TRUE	YGL200C	EMP24	no_peak_overlap	no_peak_overlap
IG_1896_genes-complement	chr07	124298	124697	chr07	124613	129239	+	tandemW	1896	sgd	gene	gene_id YGL197W; gene_name MDS3; gene_source sgd; gene_biotype protein_coding;	1	400	tandem	TRUE	TRUE	YGL197W	MDS3	mild_peak	any_peak_overlap
IG_1897_genes-complement	chr07	129161	129882	chr07	129815	131295	+	tandemW	1897	sgd	gene	gene_id YGL196W; gene_name DSD1; gene_source sgd; gene_biotype protein_coding;	1	722	tandem	TRUE	TRUE	YGL196W	DSD1	no_peak_overlap	no_peak_overlap
IG_1898_genes-complement	chr07	131169	131524	chr07	131481	139651	+	tandemW	1898	sgd	gene	gene_id YGL195W; gene_name GCN1; gene_source sgd; gene_biotype protein_coding;	1	356	tandem	TRUE	TRUE	YGL195W	GCN1	no_peak_overlap	no_peak_overlap
IG_190_genes-complement	chr02	182094	182400	chr02	181496	182128	-	divergent	190	sgd	gene	gene_id YBL021C; gene_name HAP3; gene_source sgd; gene_biotype protein_coding;	-1	307	divergent	TRUE	TRUE	YBL021C	HAP3	no_peak_overlap	no_peak_overlap
IG_190_genes-complement	chr02	182094	182400	chr02	182326	184216	+	divergent	190	sgd	gene	gene_id YBL020W; gene_name RFT1; gene_source sgd; gene_biotype protein_coding;	1	307	divergent	TRUE	TRUE	YBL020W	RFT1	no_peak_overlap	no_peak_overlap
IG_1900_genes-complement	chr07	139961	140367	chr07	139553	140009	-	tandemC	1900	sgd	gene	gene_id YGL194C-A; gene_source sgd; gene_biotype protein_coding;	-1	407	tandem	TRUE	TRUE	YGL194C-A		no_peak_overlap	no_peak_overlap
IG_1901_genes-complement	chr07	141726	141915	chr07	140300	141777	-	tandemC	1901	sgd	gene	gene_id YGL194C; gene_name HOS2; gene_source sgd; gene_biotype protein_coding;	-1	190	tandem	TRUE	TRUE	YGL194C	HOS2	mild_peak	any_peak_overlap
IG_1902_genes-complement	chr07	142227	142245	chr07	141863	142276	-	divergent	1902	sgd	gene	gene_id YGL193C; gene_source sgd; gene_biotype protein_coding;	-1	19	divergent	TRUE	TRUE	YGL193C		no_peak_overlap	no_peak_overlap
IG_1902_genes-complement	chr07	142227	142245	chr07	142152	144094	+	divergent	1902	sgd	gene	gene_id YGL192W; gene_name IME4; gene_source sgd; gene_biotype protein_coding;	1	19	divergent	TRUE	TRUE	YGL192W	IME4	no_peak_overlap	no_peak_overlap
IG_1903_genes-complement	chr07	144048	144807	chr07	144764	145380	+	tandemW	1903	sgd	gene	gene_id YGL191W; gene_name COX13; gene_source sgd; gene_biotype protein_coding;	1	760	tandem	TRUE	TRUE	YGL191W	COX13	mild_peak	any_peak_overlap
IG_1905_genes-complement	chr07	147389	148228	chr07	145656	147484	-	tandemC	1905	sgd	gene	gene_id YGL190C; gene_name CDC55; gene_source sgd; gene_biotype protein_coding;	-1	840	tandem	TRUE	TRUE	YGL190C	CDC55	mild_peak	any_peak_overlap
IG_1906_genes-complement	chr07	148588	148823	chr07	148162	148991	-	tandemC	1906	sgd	gene	gene_id YGL189C; gene_name RPS26A; gene_source sgd; gene_biotype protein_coding;	-1	236	tandem	TRUE	TRUE	YGL189C	RPS26A	no_peak_overlap	no_peak_overlap
IG_1907_genes-complement	chr07	148964	149342	chr07	148735	148990	-	tandemC	1907	sgd	gene	gene_id YGL188C-A; gene_source sgd; gene_biotype protein_coding;	-1	379	tandem	TRUE	TRUE	YGL188C-A		strong_peak	any_peak_overlap
IG_1908_genes-complement	chr07	149516	149703	chr07	149316	149601	-	tandemC	1908	sgd	gene	gene_id YGL188C; gene_source sgd; gene_biotype protein_coding;	-1	188	tandem	TRUE	TRUE	YGL188C		no_peak_overlap	no_peak_overlap
IG_1909_genes-complement	chr07	150171	151036	chr07	149566	150637	-	tandemC	1909	sgd	gene	gene_id YGL187C; gene_name COX4; gene_source sgd; gene_biotype protein_coding;	-1	866	tandem	TRUE	TRUE	YGL187C	COX4	mild_peak	any_peak_overlap
IG_191_genes-complement	chr02	184125	184352	chr02	184311	186029	+	tandemW	191	sgd	gene	gene_id YBL019W; gene_name APN2; gene_source sgd; gene_biotype protein_coding;	1	228	tandem	TRUE	TRUE	YBL019W	APN2	no_peak_overlap	no_peak_overlap
IG_1910_genes-complement	chr07	152776	153166	chr07	150991	152818	-	tandemC	1910	sgd	gene	gene_id YGL186C; gene_name TPN1; gene_source sgd; gene_biotype protein_coding;	-1	391	tandem	TRUE	TRUE	YGL186C	TPN1	no_peak_overlap	no_peak_overlap
IG_1911_genes-complement	chr07	154306	154614	chr07	153073	154332	-	tandemC	1911	sgd	gene	gene_id YGL185C; gene_source sgd; gene_biotype protein_coding;	-1	309	tandem	TRUE	TRUE	YGL185C		no_peak_overlap	no_peak_overlap
IG_1912_genes-complement	chr07	156012	156542	chr07	154510	156065	-	tandemC	1912	sgd	gene	gene_id YGL184C; gene_name STR3; gene_source sgd; gene_biotype protein_coding;	-1	531	tandem	TRUE	TRUE	YGL184C	STR3	mild_peak	any_peak_overlap
IG_1912_genes-complement	chr07	156012	156542	chr07	154510	156065	-	tandemC	1912	sgd	gene	gene_id YGL184C; gene_name STR3; gene_source sgd; gene_biotype protein_coding;	-1	531	tandem	TRUE	TRUE	YGL184C	STR3	strong_peak	any_peak_overlap
IG_1913_genes-complement	chr07	157596	157905	chr07	157852	159213	+	divergent	1913	sgd	gene	gene_id YGL181W; gene_name GTS1; gene_source sgd; gene_biotype protein_coding;	1	310	divergent	TRUE	TRUE	YGL181W	GTS1	mild_peak	any_peak_overlap
IG_1913_genes-complement	chr07	157596	157905	chr07	157273	157596	-	divergent	1913	sgd	gene	gene_id YGL182C; gene_source sgd; gene_biotype protein_coding;	-1	310	divergent	FALSE	TRUE	YGL182C		mild_peak	any_peak_overlap
IG_1914_genes-complement	chr07	159096	160064	chr07	160003	162905	+	tandemW	1914	sgd	gene	gene_id YGL180W; gene_name ATG1; gene_source sgd; gene_biotype protein_coding;	1	969	tandem	TRUE	TRUE	YGL180W	ATG1	strong_peak	any_peak_overlap
IG_1916_genes-complement	chr07	165091	167351	chr07	163336	165129	-	divergent	1916	sgd	gene	gene_id YGL179C; gene_name TOS3; gene_source sgd; gene_biotype protein_coding;	-1	2261	divergent	TRUE	TRUE	YGL179C	TOS3	strong_peak	any_peak_overlap
IG_1916_genes-complement	chr07	165091	167351	chr07	167253	170662	+	divergent	1916	sgd	gene	gene_id YGL178W; gene_name MPT5; gene_source sgd; gene_biotype protein_coding;	1	2261	divergent	TRUE	TRUE	YGL178W	MPT5	strong_peak	any_peak_overlap
IG_1918_genes-complement	chr07	173079	173284	chr07	171314	173123	-	tandemC	1918	sgd	gene	gene_id YGL176C; gene_source sgd; gene_biotype protein_coding;	-1	206	tandem	TRUE	TRUE	YGL176C		no_peak_overlap	no_peak_overlap
IG_1919_genes-complement	chr07	174322	174544	chr07	173179	174367	-	divergent	1919	sgd	gene	gene_id YGL175C; gene_name SAE2; gene_source sgd; gene_biotype protein_coding;	-1	223	divergent	TRUE	TRUE	YGL175C	SAE2	no_peak_overlap	no_peak_overlap
IG_1919_genes-complement	chr07	174322	174544	chr07	174525	175521	+	divergent	1919	sgd	gene	gene_id YGL174W; gene_name BUD13; gene_source sgd; gene_biotype protein_coding;	1	223	divergent	TRUE	TRUE	YGL174W	BUD13	no_peak_overlap	no_peak_overlap
IG_1921_genes-complement	chr07	180113	180699	chr07	175527	180113	-	divergent	1921	sgd	gene	gene_id YGL173C; gene_name XRN1; gene_source sgd; gene_biotype protein_coding;	-1	587	divergent	FALSE	TRUE	YGL173C	XRN1	no_peak_overlap	no_peak_overlap
IG_1921_genes-complement	chr07	180113	180699	chr07	180665	182222	+	divergent	1921	sgd	gene	gene_id YGL172W; gene_name NUP49; gene_source sgd; gene_biotype protein_coding;	1	587	divergent	TRUE	TRUE	YGL172W	NUP49	no_peak_overlap	no_peak_overlap
IG_1922_genes-complement	chr07	182118	182389	chr07	182361	184180	+	tandemW	1922	sgd	gene	gene_id YGL171W; gene_name ROK1; gene_source sgd; gene_biotype protein_coding;	1	272	tandem	TRUE	TRUE	YGL171W	ROK1	no_peak_overlap	no_peak_overlap
IG_1924_genes-complement	chr07	185394	186058	chr07	184059	185448	-	divergent	1924	sgd	gene	gene_id YGL170C; gene_name SPO74; gene_source sgd; gene_biotype protein_coding;	-1	665	divergent	TRUE	TRUE	YGL170C	SPO74	no_peak_overlap	no_peak_overlap
IG_1924_genes-complement	chr07	185394	186058	chr07	185997	187496	+	divergent	1924	sgd	gene	gene_id YGL169W; gene_name SUA5; gene_source sgd; gene_biotype protein_coding;	1	665	divergent	TRUE	TRUE	YGL169W	SUA5	no_peak_overlap	no_peak_overlap
IG_1925_genes-complement	chr07	187339	187463	chr07	187464	187796	+	tandemW	1925	sgd	gene	gene_id YGL168W; gene_name HUR1; gene_source sgd; gene_biotype protein_coding;	1	125	tandem	FALSE	TRUE	YGL168W	HUR1	no_peak_overlap	no_peak_overlap
IG_1926_genes-complement	chr07	190468	191128	chr07	187453	190512	-	divergent	1926	sgd	gene	gene_id YGL167C; gene_name PMR1; gene_source sgd; gene_biotype protein_coding;	-1	661	divergent	TRUE	TRUE	YGL167C	PMR1	mild_peak	any_peak_overlap
IG_1926_genes-complement	chr07	190468	191128	chr07	191110	191963	+	divergent	1926	sgd	gene	gene_id YGL166W; gene_name CUP2; gene_source sgd; gene_biotype protein_coding;	1	661	divergent	TRUE	TRUE	YGL166W	CUP2	mild_peak	any_peak_overlap
IG_1927_genes-complement	chr07	191976	191977	chr07	191398	191976	-	tandemC	1927	sgd	gene	gene_id YGL165C; gene_source sgd; gene_biotype protein_coding;	-1	2	tandem	FALSE	TRUE	YGL165C		mild_peak	any_peak_overlap
IG_1928_genes-complement	chr07	193300	193706	chr07	191892	193325	-	tandemC	1928	sgd	gene	gene_id YGL164C; gene_name YRB30; gene_source sgd; gene_biotype protein_coding;	-1	407	tandem	TRUE	TRUE	YGL164C	YRB30	no_peak_overlap	no_peak_overlap
IG_1929_genes-complement	chr07	196403	198137	chr07	198065	199186	+	divergent	1929	sgd	gene	gene_id YGL162W; gene_name SUT1; gene_source sgd; gene_biotype protein_coding;	1	1735	divergent	TRUE	TRUE	YGL162W	SUT1	strong_peak	any_peak_overlap
IG_1929_genes-complement	chr07	196403	198137	chr07	193601	196486	-	divergent	1929	sgd	gene	gene_id YGL163C; gene_name RAD54; gene_source sgd; gene_biotype protein_coding;	-1	1735	divergent	TRUE	TRUE	YGL163C	RAD54	strong_peak	any_peak_overlap
IG_193_genes-complement	chr02	186474	186843	chr02	185926	186511	-	tandemC	193	sgd	gene	gene_id YBL018C; gene_name POP8; gene_source sgd; gene_biotype protein_coding;	-1	370	tandem	TRUE	TRUE	YBL018C	POP8	no_peak_overlap	no_peak_overlap
IG_1931_genes-complement	chr07	200142	200560	chr07	199075	200218	-	divergent	1931	sgd	gene	gene_id YGL161C; gene_name YIP5; gene_source sgd; gene_biotype protein_coding;	-1	419	divergent	TRUE	TRUE	YGL161C	YIP5	no_peak_overlap	no_peak_overlap
IG_1931_genes-complement	chr07	200142	200560	chr07	200455	202409	+	divergent	1931	sgd	gene	gene_id YGL160W; gene_name AIM14; gene_source sgd; gene_biotype protein_coding;	1	419	divergent	TRUE	TRUE	YGL160W	AIM14	no_peak_overlap	no_peak_overlap
IG_1932_genes-complement	chr07	202273	202720	chr07	202695	203979	+	tandemW	1932	sgd	gene	gene_id YGL159W; gene_source sgd; gene_biotype protein_coding;	1	448	tandem	TRUE	TRUE	YGL159W		no_peak_overlap	no_peak_overlap
IG_1933_genes-complement	chr07	203833	207032	chr07	206908	208698	+	tandemW	1933	sgd	gene	gene_id YGL158W; gene_name RCK1; gene_source sgd; gene_biotype protein_coding;	1	3200	tandem	TRUE	TRUE	YGL158W	RCK1	mild_peak	any_peak_overlap
IG_1934_genes-complement	chr07	208571	209005	chr07	208949	210144	+	tandemW	1934	sgd	gene	gene_id YGL157W; gene_name ARI1; gene_source sgd; gene_biotype protein_coding;	1	435	tandem	TRUE	TRUE	YGL157W	ARI1	mild_peak	any_peak_overlap
IG_1935_genes-complement	chr07	210049	210415	chr07	210340	213819	+	tandemW	1935	sgd	gene	gene_id YGL156W; gene_name AMS1; gene_source sgd; gene_biotype protein_coding;	1	367	tandem	TRUE	TRUE	YGL156W	AMS1	no_peak_overlap	no_peak_overlap
IG_1936_genes-complement	chr07	213667	214080	chr07	213985	215333	+	tandemW	1936	sgd	gene	gene_id YGL155W; gene_name CDC43; gene_source sgd; gene_biotype protein_coding;	1	414	tandem	TRUE	TRUE	YGL155W	CDC43	no_peak_overlap	no_peak_overlap
IG_1938_genes-complement	chr07	216096	216272	chr07	215220	216107	-	divergent	1938	sgd	gene	gene_id YGL154C; gene_name LYS5; gene_source sgd; gene_biotype protein_coding;	-1	177	divergent	TRUE	TRUE	YGL154C	LYS5	no_peak_overlap	no_peak_overlap
IG_1938_genes-complement	chr07	216096	216272	chr07	216235	217348	+	divergent	1938	sgd	gene	gene_id YGL153W; gene_name PEX14; gene_source sgd; gene_biotype protein_coding;	1	177	divergent	TRUE	TRUE	YGL153W	PEX14	no_peak_overlap	no_peak_overlap
IG_1939_genes-complement	chr07	217369	217523	chr07	216692	217369	-	divergent	1939	sgd	gene	gene_id YGL152C; gene_source sgd; gene_biotype protein_coding;	-1	155	divergent	FALSE	TRUE	YGL152C		mild_peak	any_peak_overlap
IG_1939_genes-complement	chr07	217369	217523	chr07	217475	221021	+	divergent	1939	sgd	gene	gene_id YGL151W; gene_name NUT1; gene_source sgd; gene_biotype protein_coding;	1	155	divergent	TRUE	TRUE	YGL151W	NUT1	mild_peak	any_peak_overlap
IG_194_genes-complement	chr02	191583	192450	chr02	186775	191654	-	divergent	194	sgd	gene	gene_id YBL017C; gene_name PEP1; gene_source sgd; gene_biotype protein_coding;	-1	868	divergent	TRUE	TRUE	YBL017C	PEP1	mild_peak	any_peak_overlap
IG_194_genes-complement	chr02	191583	192450	chr02	192408	193648	+	divergent	194	sgd	gene	gene_id YBL016W; gene_name FUS3; gene_source sgd; gene_biotype protein_coding;	1	868	divergent	TRUE	TRUE	YBL016W	FUS3	mild_peak	any_peak_overlap
IG_1941_genes-complement	chr07	225877	226398	chr07	226362	227655	+	tandemW	1941	sgd	gene	gene_id YGL148W; gene_name ARO2; gene_source sgd; gene_biotype protein_coding;	1	522	tandem	TRUE	TRUE	YGL148W	ARO2	mild_peak	any_peak_overlap
IG_1943_genes-complement	chr07	228329	228750	chr07	227643	228349	-	tandemC	1943	sgd	gene	gene_id YGL147C; gene_name RPL9A; gene_source sgd; gene_biotype protein_coding;	-1	422	tandem	TRUE	TRUE	YGL147C	RPL9A	mild_peak	any_peak_overlap
IG_1944_genes-complement	chr07	229686	230242	chr07	230179	232456	+	divergent	1944	sgd	gene	gene_id YGL145W; gene_name TIP20; gene_source sgd; gene_biotype protein_coding;	1	557	divergent	TRUE	TRUE	YGL145W	TIP20	strong_peak	any_peak_overlap
IG_1944_genes-complement	chr07	229686	230242	chr07	228622	229765	-	divergent	1944	sgd	gene	gene_id YGL146C; gene_name RRT6; gene_source sgd; gene_biotype protein_coding;	-1	557	divergent	TRUE	TRUE	YGL146C	RRT6	strong_peak	any_peak_overlap
IG_1946_genes-complement	chr07	234507	234716	chr07	232377	234551	-	tandemC	1946	sgd	gene	gene_id YGL144C; gene_name ROG1; gene_source sgd; gene_biotype protein_coding;	-1	210	tandem	TRUE	TRUE	YGL144C	ROG1	no_peak_overlap	no_peak_overlap
IG_1947_genes-complement	chr07	235958	236268	chr07	234606	235990	-	tandemC	1947	sgd	gene	gene_id YGL143C; gene_name MRF1; gene_source sgd; gene_biotype protein_coding;	-1	311	tandem	TRUE	TRUE	YGL143C	MRF1	no_peak_overlap	no_peak_overlap
IG_1948_genes-complement	chr07	238119	238352	chr07	236152	238170	-	divergent	1948	sgd	gene	gene_id YGL142C; gene_name GPI10; gene_source sgd; gene_biotype protein_coding;	-1	234	divergent	TRUE	TRUE	YGL142C	GPI10	mild_peak	any_peak_overlap
IG_1948_genes-complement	chr07	238119	238352	chr07	238317	241220	+	divergent	1948	sgd	gene	gene_id YGL141W; gene_name HUL5; gene_source sgd; gene_biotype protein_coding;	1	234	divergent	TRUE	TRUE	YGL141W	HUL5	mild_peak	any_peak_overlap
IG_195_genes-complement	chr02	193512	194121	chr02	194034	195923	+	tandemW	195	sgd	gene	gene_id YBL015W; gene_name ACH1; gene_source sgd; gene_biotype protein_coding;	1	610	tandem	TRUE	TRUE	YBL015W	ACH1	no_peak_overlap	no_peak_overlap
IG_1950_genes-complement	chr07	245012	245715	chr07	241129	245122	-	divergent	1950	sgd	gene	gene_id YGL140C; gene_source sgd; gene_biotype protein_coding;	-1	704	divergent	TRUE	TRUE	YGL140C		no_peak_overlap	no_peak_overlap
IG_1950_genes-complement	chr07	245012	245715	chr07	245662	248326	+	divergent	1950	sgd	gene	gene_id YGL139W; gene_name FLC3; gene_source sgd; gene_biotype protein_coding;	1	704	divergent	TRUE	TRUE	YGL139W	FLC3	no_peak_overlap	no_peak_overlap
IG_1952_genes-complement	chr07	249531	249868	chr07	248276	249591	-	divergent	1952	sgd	gene	gene_id YGL138C; gene_source sgd; gene_biotype protein_coding;	-1	338	divergent	TRUE	TRUE	YGL138C		no_peak_overlap	no_peak_overlap
IG_1952_genes-complement	chr07	249531	249868	chr07	249839	252928	+	divergent	1952	sgd	gene	gene_id YGL137W; gene_name SEC27; gene_source sgd; gene_biotype protein_coding;	1	338	divergent	TRUE	TRUE	YGL137W	SEC27	no_peak_overlap	no_peak_overlap
IG_1954_genes-complement	chr07	253859	254640	chr07	254569	255392	+	divergent	1954	sgd	gene	gene_id YGL135W; gene_name RPL1B; gene_source sgd; gene_biotype protein_coding;	1	782	divergent	TRUE	TRUE	YGL135W	RPL1B	strong_peak	any_peak_overlap
IG_1954_genes-complement	chr07	253859	254640	chr07	252783	253906	-	divergent	1954	sgd	gene	gene_id YGL136C; gene_name MRM2; gene_source sgd; gene_biotype protein_coding;	-1	782	divergent	TRUE	TRUE	YGL136C	MRM2	strong_peak	any_peak_overlap
IG_1955_genes-complement	chr07	255294	255662	chr07	255561	257042	+	tandemW	1955	sgd	gene	gene_id YGL134W; gene_name PCL10; gene_source sgd; gene_biotype protein_coding;	1	369	tandem	TRUE	TRUE	YGL134W	PCL10	mild_peak	any_peak_overlap
IG_1956_genes-complement	chr07	256964	257706	chr07	257617	261583	+	tandemW	1956	sgd	gene	gene_id YGL133W; gene_name ITC1; gene_source sgd; gene_biotype protein_coding;	1	743	tandem	TRUE	TRUE	YGL133W	ITC1	no_peak_overlap	no_peak_overlap
IG_1957_genes-complement	chr07	261501	261579	chr07	261482	262087	+	tandemW	1957	sgd	gene	gene_id YGL132W; gene_source sgd; gene_biotype protein_coding;	1	79	tandem	TRUE	TRUE	YGL132W		no_peak_overlap	no_peak_overlap
IG_1958_genes-complement	chr07	265859	266144	chr07	261493	265926	-	divergent	1958	sgd	gene	gene_id YGL131C; gene_name SNT2; gene_source sgd; gene_biotype protein_coding;	-1	286	divergent	TRUE	TRUE	YGL131C	SNT2	no_peak_overlap	no_peak_overlap
IG_1958_genes-complement	chr07	265859	266144	chr07	266097	267657	+	divergent	1958	sgd	gene	gene_id YGL130W; gene_name CEG1; gene_source sgd; gene_biotype protein_coding;	1	286	divergent	TRUE	TRUE	YGL130W	CEG1	no_peak_overlap	no_peak_overlap
IG_1960_genes-complement	chr07	269075	269292	chr07	267594	269136	-	tandemC	1960	sgd	gene	gene_id YGL129C; gene_name RSM23; gene_source sgd; gene_biotype protein_coding;	-1	218	tandem	TRUE	TRUE	YGL129C	RSM23	no_peak_overlap	no_peak_overlap
IG_1961_genes-complement	chr07	270144	270391	chr07	269124	270165	-	tandemC	1961	sgd	gene	gene_id YGL128C; gene_name CWC23; gene_source sgd; gene_biotype protein_coding;	-1	248	tandem	TRUE	TRUE	YGL128C	CWC23	no_peak_overlap	no_peak_overlap
IG_1962_genes-complement	chr07	270775	270996	chr07	270947	272378	+	divergent	1962	sgd	gene	gene_id YGL126W; gene_name SCS3; gene_source sgd; gene_biotype protein_coding;	1	222	divergent	TRUE	TRUE	YGL126W	SCS3	strong_peak	any_peak_overlap
IG_1962_genes-complement	chr07	270775	270996	chr07	270252	270808	-	divergent	1962	sgd	gene	gene_id YGL127C; gene_name SOH1; gene_source sgd; gene_biotype protein_coding;	-1	222	divergent	TRUE	TRUE	YGL127C	SOH1	strong_peak	any_peak_overlap
IG_1963_genes-complement	chr07	272139	272519	chr07	272520	274322	+	tandemW	1963	sgd	gene	gene_id YGL125W; gene_name MET13; gene_source sgd; gene_biotype protein_coding;	1	381	tandem	FALSE	TRUE	YGL125W	MET13	strong_peak	any_peak_overlap
IG_1965_genes-complement	chr07	276714	277616	chr07	274647	276741	-	divergent	1965	sgd	gene	gene_id YGL124C; gene_name MON1; gene_source sgd; gene_biotype protein_coding;	-1	903	divergent	TRUE	TRUE	YGL124C	MON1	strong_peak	any_peak_overlap
IG_1965_genes-complement	chr07	276714	277616	chr07	277536	278475	+	divergent	1965	sgd	gene	gene_id YGL123W; gene_name RPS2; gene_source sgd; gene_biotype protein_coding;	1	903	divergent	TRUE	TRUE	YGL123W	RPS2	strong_peak	any_peak_overlap
IG_1967_genes-complement	chr07	280523	280776	chr07	278764	280545	-	tandemC	1967	sgd	gene	gene_id YGL122C; gene_name NAB2; gene_source sgd; gene_biotype protein_coding;	-1	254	tandem	TRUE	TRUE	YGL122C	NAB2	mild_peak	any_peak_overlap
IG_1968_genes-complement	chr07	281157	281633	chr07	280615	281227	-	tandemC	1968	sgd	gene	gene_id YGL121C; gene_name GPG1; gene_source sgd; gene_biotype protein_coding;	-1	477	tandem	TRUE	TRUE	YGL121C	GPG1	mild_peak	any_peak_overlap
IG_1969_genes-complement	chr07	283937	284441	chr07	284413	286031	+	divergent	1969	sgd	gene	gene_id YGL119W; gene_name COQ8; gene_source sgd; gene_biotype protein_coding;	1	505	divergent	TRUE	TRUE	YGL119W	COQ8	no_peak_overlap	no_peak_overlap
IG_1969_genes-complement	chr07	283937	284441	chr07	281532	283978	-	divergent	1969	sgd	gene	gene_id YGL120C; gene_name PRP43; gene_source sgd; gene_biotype protein_coding;	-1	505	divergent	TRUE	TRUE	YGL120C	PRP43	no_peak_overlap	no_peak_overlap
IG_197_genes-complement	chr02	201748	202055	chr02	201972	203439	+	divergent	197	sgd	gene	gene_id YBL013W; gene_name FMT1; gene_source sgd; gene_biotype protein_coding;	1	308	divergent	TRUE	TRUE	YBL013W	FMT1	mild_peak	any_peak_overlap
IG_197_genes-complement	chr02	201748	202055	chr02	198928	201775	-	divergent	197	sgd	gene	gene_id YBL014C; gene_name RRN6; gene_source sgd; gene_biotype protein_coding;	-1	308	divergent	TRUE	TRUE	YBL014C	RRN6	mild_peak	any_peak_overlap
IG_1971_genes-complement	chr07	288451	288511	chr07	288443	289409	+	divergent	1971	sgd	gene	gene_id YGL117W; gene_source sgd; gene_biotype protein_coding;	1	61	divergent	TRUE	TRUE	YGL117W		mild_peak	any_peak_overlap
IG_1971_genes-complement	chr07	288451	288511	chr07	287853	288525	-	divergent	1971	sgd	gene	gene_id YGL118C; gene_source sgd; gene_biotype protein_coding;	-1	61	divergent	TRUE	TRUE	YGL118C		mild_peak	any_peak_overlap
IG_1972_genes-complement	chr07	289309	289808	chr07	289675	291739	+	tandemW	1972	sgd	gene	gene_id YGL116W; gene_name CDC20; gene_source sgd; gene_biotype protein_coding;	1	500	tandem	TRUE	TRUE	YGL116W	CDC20	mild_peak	any_peak_overlap
IG_1973_genes-complement	chr07	291641	292032	chr07	291928	293085	+	tandemW	1973	sgd	gene	gene_id YGL115W; gene_name SNF4; gene_source sgd; gene_biotype protein_coding;	1	392	tandem	TRUE	TRUE	YGL115W	SNF4	no_peak_overlap	no_peak_overlap
IG_1974_genes-complement	chr07	293001	293459	chr07	293394	295711	+	tandemW	1974	sgd	gene	gene_id YGL114W; gene_source sgd; gene_biotype protein_coding;	1	459	tandem	TRUE	TRUE	YGL114W		no_peak_overlap	no_peak_overlap
IG_1975_genes-complement	chr07	295637	295931	chr07	295879	298169	+	tandemW	1975	sgd	gene	gene_id YGL113W; gene_name SLD3; gene_source sgd; gene_biotype protein_coding;	1	295	tandem	TRUE	TRUE	YGL113W	SLD3	no_peak_overlap	no_peak_overlap
IG_1977_genes-complement	chr07	299728	299977	chr07	298048	299764	-	divergent	1977	sgd	gene	gene_id YGL112C; gene_name TAF6; gene_source sgd; gene_biotype protein_coding;	-1	250	divergent	TRUE	TRUE	YGL112C	TAF6	no_peak_overlap	no_peak_overlap
IG_1977_genes-complement	chr07	299728	299977	chr07	299944	301535	+	divergent	1977	sgd	gene	gene_id YGL111W; gene_name NSA1; gene_source sgd; gene_biotype protein_coding;	1	250	divergent	TRUE	TRUE	YGL111W	NSA1	no_peak_overlap	no_peak_overlap
IG_1979_genes-complement	chr07	303411	303512	chr07	301434	303429	-	divergent	1979	sgd	gene	gene_id YGL110C; gene_name CUE3; gene_source sgd; gene_biotype protein_coding;	-1	102	divergent	TRUE	TRUE	YGL110C	CUE3	no_peak_overlap	no_peak_overlap
IG_1979_genes-complement	chr07	303411	303512	chr07	303513	303836	+	divergent	1979	sgd	gene	gene_id YGL109W; gene_source sgd; gene_biotype protein_coding;	1	102	divergent	FALSE	TRUE	YGL109W		no_peak_overlap	no_peak_overlap
IG_1980_genes-complement	chr07	304071	304332	chr07	303463	304104	-	tandemC	1980	sgd	gene	gene_id YGL108C; gene_source sgd; gene_biotype protein_coding;	-1	262	tandem	TRUE	TRUE	YGL108C		no_peak_overlap	no_peak_overlap
IG_1981_genes-complement	chr07	306273	306559	chr07	304226	306310	-	divergent	1981	sgd	gene	gene_id YGL107C; gene_name RMD9; gene_source sgd; gene_biotype protein_coding;	-1	287	divergent	TRUE	TRUE	YGL107C	RMD9	no_peak_overlap	no_peak_overlap
IG_1981_genes-complement	chr07	306273	306559	chr07	306529	307180	+	divergent	1981	sgd	gene	gene_id YGL106W; gene_name MLC1; gene_source sgd; gene_biotype protein_coding;	1	287	divergent	TRUE	TRUE	YGL106W	MLC1	no_peak_overlap	no_peak_overlap
IG_1982_genes-complement	chr07	307009	307436	chr07	307405	308668	+	tandemW	1982	sgd	gene	gene_id YGL105W; gene_name ARC1; gene_source sgd; gene_biotype protein_coding;	1	428	tandem	TRUE	TRUE	YGL105W	ARC1	no_peak_overlap	no_peak_overlap
IG_1984_genes-complement	chr07	310173	310966	chr07	308556	310199	-	divergent	1984	sgd	gene	gene_id YGL104C; gene_name VPS73; gene_source sgd; gene_biotype protein_coding;	-1	794	divergent	TRUE	TRUE	YGL104C	VPS73	strong_peak	any_peak_overlap
IG_1984_genes-complement	chr07	310173	310966	chr07	310946	312011	+	divergent	1984	sgd	gene	gene_id YGL103W; gene_name RPL28; gene_source sgd; gene_biotype protein_coding;	1	794	divergent	TRUE	TRUE	YGL103W	RPL28	strong_peak	any_peak_overlap
IG_1985_genes-complement	chr07	311933	312192	chr07	311505	311933	-	divergent	1985	sgd	gene	gene_id YGL102C; gene_source sgd; gene_biotype protein_coding;	-1	260	divergent	FALSE	TRUE	YGL102C		no_peak_overlap	no_peak_overlap
IG_1985_genes-complement	chr07	311933	312192	chr07	312170	313051	+	divergent	1985	sgd	gene	gene_id YGL101W; gene_source sgd; gene_biotype protein_coding;	1	260	divergent	TRUE	TRUE	YGL101W		no_peak_overlap	no_peak_overlap
IG_1986_genes-complement	chr07	312840	313233	chr07	313195	314381	+	tandemW	1986	sgd	gene	gene_id YGL100W; gene_name SEH1; gene_source sgd; gene_biotype protein_coding;	1	394	tandem	TRUE	TRUE	YGL100W	SEH1	no_peak_overlap	no_peak_overlap
IG_1987_genes-complement	chr07	314283	314630	chr07	314583	316601	+	tandemW	1987	sgd	gene	gene_id YGL099W; gene_name LSG1; gene_source sgd; gene_biotype protein_coding;	1	348	tandem	TRUE	TRUE	YGL099W	LSG1	no_peak_overlap	no_peak_overlap
IG_1988_genes-complement	chr07	316553	317341	chr07	317292	318198	+	tandemW	1988	sgd	gene	gene_id YGL098W; gene_name USE1; gene_source sgd; gene_biotype protein_coding;	1	789	tandem	TRUE	TRUE	YGL098W	USE1	no_peak_overlap	no_peak_overlap
IG_1989_genes-complement	chr07	318079	321781	chr07	321731	323333	+	tandemW	1989	sgd	gene	gene_id YGL097W; gene_name SRM1; gene_source sgd; gene_biotype protein_coding;	1	3703	tandem	TRUE	TRUE	YGL097W	SRM1	mild_peak	any_peak_overlap
IG_1990_genes-complement	chr07	323230	325330	chr07	325287	326300	+	tandemW	1990	sgd	gene	gene_id YGL096W; gene_name TOS8; gene_source sgd; gene_biotype protein_coding;	1	2101	tandem	TRUE	TRUE	YGL096W	TOS8	mild_peak	any_peak_overlap
IG_1990_genes-complement	chr07	323230	325330	chr07	325287	326300	+	tandemW	1990	sgd	gene	gene_id YGL096W; gene_name TOS8; gene_source sgd; gene_biotype protein_coding;	1	2101	tandem	TRUE	TRUE	YGL096W	TOS8	strong_peak	any_peak_overlap
IG_1992_genes-complement	chr07	330607	331117	chr07	328792	330661	-	tandemC	1992	sgd	gene	gene_id YGL095C; gene_name VPS45; gene_source sgd; gene_biotype protein_coding;	-1	511	tandem	TRUE	TRUE	YGL095C	VPS45	mild_peak	any_peak_overlap
IG_1993_genes-complement	chr07	334465	334885	chr07	330970	334521	-	divergent	1993	sgd	gene	gene_id YGL094C; gene_name PAN2; gene_source sgd; gene_biotype protein_coding;	-1	421	divergent	TRUE	TRUE	YGL094C	PAN2	no_peak_overlap	no_peak_overlap
IG_1993_genes-complement	chr07	334465	334885	chr07	334823	337679	+	divergent	1993	sgd	gene	gene_id YGL093W; gene_name SPC105; gene_source sgd; gene_biotype protein_coding;	1	421	divergent	TRUE	TRUE	YGL093W	SPC105	no_peak_overlap	no_peak_overlap
IG_1994_genes-complement	chr07	337639	337905	chr07	337797	341928	+	tandemW	1994	sgd	gene	gene_id YGL092W; gene_name NUP145; gene_source sgd; gene_biotype protein_coding;	1	267	tandem	TRUE	TRUE	YGL092W	NUP145	no_peak_overlap	no_peak_overlap
IG_1996_genes-complement	chr07	343042	343318	chr07	341931	343081	-	divergent	1996	sgd	gene	gene_id YGL091C; gene_name NBP35; gene_source sgd; gene_biotype protein_coding;	-1	277	divergent	TRUE	TRUE	YGL091C	NBP35	no_peak_overlap	no_peak_overlap
IG_1996_genes-complement	chr07	343042	343318	chr07	343280	344676	+	divergent	1996	sgd	gene	gene_id YGL090W; gene_name LIF1; gene_source sgd; gene_biotype protein_coding;	1	277	divergent	TRUE	TRUE	YGL090W	LIF1	no_peak_overlap	no_peak_overlap
IG_1998_genes-complement	chr07	345153	345835	chr07	345757	346392	+	divergent	1998	sgd	gene	gene_id YGL088W; gene_source sgd; gene_biotype protein_coding;	1	683	divergent	TRUE	TRUE	YGL088W		no_peak_overlap	no_peak_overlap
IG_1998_genes-complement	chr07	345153	345835	chr07	344625	345190	-	divergent	1998	sgd	gene	gene_id YGL089C; gene_name MF(ALPHA)2; gene_source sgd; gene_biotype protein_coding;	-1	683	divergent	TRUE	TRUE	YGL089C	MF(ALPHA)2	no_peak_overlap	no_peak_overlap
IG_20_genes-complement	chr01	45022	45898	chr01	45794	48320	+	divergent	20	sgd	gene	gene_id YAL053W; gene_name FLC2; gene_source sgd; gene_biotype protein_coding;	1	877	divergent	TRUE	TRUE	YAL053W	FLC2	strong_peak	any_peak_overlap
IG_20_genes-complement	chr01	45022	45898	chr01	42719	45075	-	divergent	20	sgd	gene	gene_id YAL054C; gene_name ACS1; gene_source sgd; gene_biotype protein_coding;	-1	877	divergent	TRUE	TRUE	YAL054C	ACS1	strong_peak	any_peak_overlap
IG_200_genes-complement	chr02	206949	207193	chr02	205917	206968	-	divergent	200	sgd	gene	gene_id YBL010C; gene_source sgd; gene_biotype protein_coding;	-1	245	divergent	TRUE	TRUE	YBL010C		no_peak_overlap	no_peak_overlap
IG_200_genes-complement	chr02	206949	207193	chr02	207152	209349	+	divergent	200	sgd	gene	gene_id YBL009W; gene_name ALK2; gene_source sgd; gene_biotype protein_coding;	1	245	divergent	TRUE	TRUE	YBL009W	ALK2	no_peak_overlap	no_peak_overlap
IG_2000_genes-complement	chr07	346904	347118	chr07	347032	349445	+	divergent	2000	sgd	gene	gene_id YGL086W; gene_name MAD1; gene_source sgd; gene_biotype protein_coding;	1	215	divergent	TRUE	TRUE	YGL086W	MAD1	no_peak_overlap	no_peak_overlap
IG_2000_genes-complement	chr07	346904	347118	chr07	346289	346948	-	divergent	2000	sgd	gene	gene_id YGL087C; gene_name MMS2; gene_source sgd; gene_biotype protein_coding;	-1	215	divergent	TRUE	TRUE	YGL087C	MMS2	no_peak_overlap	no_peak_overlap
IG_2001_genes-complement	chr07	349368	349615	chr07	349562	350609	+	tandemW	2001	sgd	gene	gene_id YGL085W; gene_name LCL3; gene_source sgd; gene_biotype protein_coding;	1	248	tandem	TRUE	TRUE	YGL085W	LCL3	no_peak_overlap	no_peak_overlap
IG_2003_genes-complement	chr07	352298	353057	chr07	350507	352349	-	divergent	2003	sgd	gene	gene_id YGL084C; gene_name GUP1; gene_source sgd; gene_biotype protein_coding;	-1	760	divergent	TRUE	TRUE	YGL084C	GUP1	no_peak_overlap	no_peak_overlap
IG_2003_genes-complement	chr07	352298	353057	chr07	352983	355617	+	divergent	2003	sgd	gene	gene_id YGL083W; gene_name SCY1; gene_source sgd; gene_biotype protein_coding;	1	760	divergent	TRUE	TRUE	YGL083W	SCY1	no_peak_overlap	no_peak_overlap
IG_2004_genes-complement	chr07	355472	355826	chr07	355745	357113	+	tandemW	2004	sgd	gene	gene_id YGL082W; gene_source sgd; gene_biotype protein_coding;	1	355	tandem	TRUE	TRUE	YGL082W		no_peak_overlap	no_peak_overlap
IG_2005_genes-complement	chr07	356972	357376	chr07	357299	358383	+	tandemW	2005	sgd	gene	gene_id YGL081W; gene_source sgd; gene_biotype protein_coding;	1	405	tandem	TRUE	TRUE	YGL081W		no_peak_overlap	no_peak_overlap
IG_2006_genes-complement	chr07	358339	358635	chr07	358581	359271	+	tandemW	2006	sgd	gene	gene_id YGL080W; gene_name MPC1; gene_source sgd; gene_biotype protein_coding;	1	297	tandem	TRUE	TRUE	YGL080W	MPC1	no_peak_overlap	no_peak_overlap
IG_2007_genes-complement	chr07	359028	359443	chr07	359416	360231	+	tandemW	2007	sgd	gene	gene_id YGL079W; gene_name KXD1; gene_source sgd; gene_biotype protein_coding;	1	416	tandem	TRUE	TRUE	YGL079W	KXD1	no_peak_overlap	no_peak_overlap
IG_2009_genes-complement	chr07	361859	362224	chr07	360107	361925	-	tandemC	2009	sgd	gene	gene_id YGL078C; gene_name DBP3; gene_source sgd; gene_biotype protein_coding;	-1	366	tandem	TRUE	TRUE	YGL078C	DBP3	no_peak_overlap	no_peak_overlap
IG_201_genes-complement	chr02	209224	209408	chr02	209409	209648	+	tandemW	201	sgd	gene	gene_id YBL008W-A; gene_source sgd; gene_biotype protein_coding;	1	185	tandem	FALSE	TRUE	YBL008W-A		no_peak_overlap	no_peak_overlap
IG_2010_genes-complement	chr07	363916	364334	chr07	362147	364009	-	tandemC	2010	sgd	gene	gene_id YGL077C; gene_name HNM1; gene_source sgd; gene_biotype protein_coding;	-1	419	tandem	TRUE	TRUE	YGL077C	HNM1	no_peak_overlap	no_peak_overlap
IG_2011_genes-complement	chr07	365996	366924	chr07	364228	366050	-	tandemC	2011	sgd	gene	gene_id YGL076C; gene_name RPL7A; gene_source sgd; gene_biotype protein_coding;	-1	929	tandem	TRUE	TRUE	YGL076C	RPL7A	mild_peak	any_peak_overlap
IG_2012_genes-complement	chr07	368088	368595	chr07	366813	368188	-	tandemC	2012	sgd	gene	gene_id YGL075C; gene_name MPS2; gene_source sgd; gene_biotype protein_coding;	-1	508	tandem	TRUE	TRUE	YGL075C	MPS2	mild_peak	any_peak_overlap
IG_2013_genes-complement	chr07	371362	372011	chr07	371954	374232	+	divergent	2013	sgd	gene	gene_id YGL071W; gene_name AFT1; gene_source sgd; gene_biotype protein_coding;	1	650	divergent	TRUE	TRUE	YGL071W	AFT1	strong_peak	any_peak_overlap
IG_2013_genes-complement	chr07	371362	372011	chr07	370921	371448	-	divergent	2013	sgd	gene	gene_id YGL072C; gene_source sgd; gene_biotype protein_coding;	-1	650	divergent	TRUE	TRUE	YGL072C		strong_peak	any_peak_overlap
IG_2015_genes-complement	chr07	374827	375049	chr07	374235	374857	-	tandemC	2015	sgd	gene	gene_id YGL070C; gene_name RPB9; gene_source sgd; gene_biotype protein_coding;	-1	223	tandem	TRUE	TRUE	YGL070C	RPB9	no_peak_overlap	no_peak_overlap
IG_2016_genes-complement	chr07	375671	376100	chr07	376018	377291	+	tandemW	2016	sgd	gene	gene_id YGL067W; gene_name NPY1; gene_source sgd; gene_biotype protein_coding;	1	430	tandem	TRUE	TRUE	YGL067W	NPY1	no_peak_overlap	no_peak_overlap
IG_2017_genes-complement	chr07	377255	377608	chr07	377544	379809	+	tandemW	2017	sgd	gene	gene_id YGL066W; gene_name SGF73; gene_source sgd; gene_biotype protein_coding;	1	354	tandem	TRUE	TRUE	YGL066W	SGF73	no_peak_overlap	no_peak_overlap
IG_2019_genes-complement	chr07	381271	381522	chr07	379703	381317	-	tandemC	2019	sgd	gene	gene_id YGL065C; gene_name ALG2; gene_source sgd; gene_biotype protein_coding;	-1	252	tandem	TRUE	TRUE	YGL065C	ALG2	no_peak_overlap	no_peak_overlap
IG_202_genes-complement	chr02	209648	209652	chr02	209583	212265	+	tandemW	202	sgd	gene	gene_id YBL008W; gene_name HIR1; gene_source sgd; gene_biotype protein_coding;	1	5	tandem	TRUE	TRUE	YBL008W	HIR1	no_peak_overlap	no_peak_overlap
IG_2020_genes-complement	chr07	383208	383653	chr07	383543	384817	+	divergent	2020	sgd	gene	gene_id YGL063W; gene_name PUS2; gene_source sgd; gene_biotype protein_coding;	1	446	divergent	TRUE	TRUE	YGL063W	PUS2	no_peak_overlap	no_peak_overlap
IG_2020_genes-complement	chr07	383208	383653	chr07	381439	383224	-	divergent	2020	sgd	gene	gene_id YGL064C; gene_name MRH4; gene_source sgd; gene_biotype protein_coding;	-1	446	divergent	TRUE	TRUE	YGL064C	MRH4	no_peak_overlap	no_peak_overlap
IG_2021_genes-complement	chr07	384766	385195	chr07	385148	388826	+	tandemW	2021	sgd	gene	gene_id YGL062W; gene_name PYC1; gene_source sgd; gene_biotype protein_coding;	1	430	tandem	TRUE	TRUE	YGL062W	PYC1	strong_peak	any_peak_overlap
IG_2023_genes-complement	chr07	389711	390064	chr07	388862	389772	-	divergent	2023	sgd	gene	gene_id YGL061C; gene_name DUO1; gene_source sgd; gene_biotype protein_coding;	-1	354	divergent	TRUE	TRUE	YGL061C	DUO1	no_peak_overlap	no_peak_overlap
IG_2023_genes-complement	chr07	389711	390064	chr07	389937	392076	+	divergent	2023	sgd	gene	gene_id YGL060W; gene_name YBP2; gene_source sgd; gene_biotype protein_coding;	1	354	divergent	TRUE	TRUE	YGL060W	YBP2	no_peak_overlap	no_peak_overlap
IG_2024_genes-complement	chr07	391990	392222	chr07	392187	393775	+	tandemW	2024	sgd	gene	gene_id YGL059W; gene_name PKP2; gene_source sgd; gene_biotype protein_coding;	1	233	tandem	TRUE	TRUE	YGL059W	PKP2	no_peak_overlap	no_peak_overlap
IG_2025_genes-complement	chr07	393698	393985	chr07	393923	394725	+	tandemW	2025	sgd	gene	gene_id YGL058W; gene_name RAD6; gene_source sgd; gene_biotype protein_coding;	1	288	tandem	TRUE	TRUE	YGL058W	RAD6	mild_peak	any_peak_overlap
IG_2027_genes-complement	chr07	395829	396034	chr07	394811	395841	-	tandemC	2027	sgd	gene	gene_id YGL057C; gene_name GEP7; gene_source sgd; gene_biotype protein_coding;	-1	206	tandem	TRUE	TRUE	YGL057C	GEP7	no_peak_overlap	no_peak_overlap
IG_2028_genes-complement	chr07	397618	398627	chr07	398565	400379	+	divergent	2028	sgd	gene	gene_id YGL055W; gene_name OLE1; gene_source sgd; gene_biotype protein_coding;	1	1010	divergent	TRUE	TRUE	YGL055W	OLE1	strong_peak	any_peak_overlap
IG_2028_genes-complement	chr07	397618	398627	chr07	395945	397712	-	divergent	2028	sgd	gene	gene_id YGL056C; gene_name SDS23; gene_source sgd; gene_biotype protein_coding;	-1	1010	divergent	TRUE	TRUE	YGL056C	SDS23	strong_peak	any_peak_overlap
IG_2030_genes-complement	chr07	401287	402588	chr07	400761	401339	-	divergent	2030	sgd	gene	gene_id YGL054C; gene_name ERV14; gene_source sgd; gene_biotype protein_coding;	-1	1302	divergent	TRUE	TRUE	YGL054C	ERV14	mild_peak	any_peak_overlap
IG_2030_genes-complement	chr07	401287	402588	chr07	402503	403463	+	divergent	2030	sgd	gene	gene_id YGL053W; gene_name PRM8; gene_source sgd; gene_biotype protein_coding;	1	1302	divergent	TRUE	TRUE	YGL053W	PRM8	mild_peak	any_peak_overlap
IG_2031_genes-complement	chr07	403302	403436	chr07	403437	403742	+	tandemW	2031	sgd	gene	gene_id YGL052W; gene_source sgd; gene_biotype protein_coding;	1	135	tandem	FALSE	TRUE	YGL052W		no_peak_overlap	no_peak_overlap
IG_2032_genes-complement	chr07	404391	405775	chr07	405737	406757	+	tandemW	2032	sgd	gene	gene_id YGL050W; gene_name TYW3; gene_source sgd; gene_biotype protein_coding;	1	1385	tandem	TRUE	TRUE	YGL050W	TYW3	mild_peak	any_peak_overlap
IG_2034_genes-complement	chr07	409604	410068	chr07	406698	409736	-	tandemC	2034	sgd	gene	gene_id YGL049C; gene_name TIF4632; gene_source sgd; gene_biotype protein_coding;	-1	465	tandem	TRUE	TRUE	YGL049C	TIF4632	mild_peak	any_peak_overlap
IG_2035_genes-complement	chr07	411286	411551	chr07	409972	411313	-	divergent	2035	sgd	gene	gene_id YGL048C; gene_name RPT6; gene_source sgd; gene_biotype protein_coding;	-1	266	divergent	TRUE	TRUE	YGL048C	RPT6	no_peak_overlap	no_peak_overlap
IG_2035_genes-complement	chr07	411286	411551	chr07	411472	412192	+	divergent	2035	sgd	gene	gene_id YGL047W; gene_name ALG13; gene_source sgd; gene_biotype protein_coding;	1	266	divergent	TRUE	TRUE	YGL047W	ALG13	no_peak_overlap	no_peak_overlap
IG_2036_genes-complement	chr07	412160	414101	chr07	414039	415945	+	tandemW	2036	sgd	gene	gene_id YGL045W; gene_name RIM8; gene_source sgd; gene_biotype protein_coding;	1	1942	tandem	TRUE	TRUE	YGL045W	RIM8	strong_peak	any_peak_overlap
IG_2038_genes-complement	chr07	417036	417482	chr07	415975	417091	-	divergent	2038	sgd	gene	gene_id YGL044C; gene_name RNA15; gene_source sgd; gene_biotype protein_coding;	-1	447	divergent	TRUE	TRUE	YGL044C	RNA15	no_peak_overlap	no_peak_overlap
IG_2038_genes-complement	chr07	417036	417482	chr07	417463	418631	+	divergent	2038	sgd	gene	gene_id YGL043W; gene_name DST1; gene_source sgd; gene_biotype protein_coding;	1	447	divergent	TRUE	TRUE	YGL043W	DST1	no_peak_overlap	no_peak_overlap
IG_2039_genes-complement	chr07	418593	418703	chr07	418288	418593	-	tandemC	2039	sgd	gene	gene_id YGL042C; gene_source sgd; gene_biotype protein_coding;	-1	111	tandem	FALSE	TRUE	YGL042C		no_peak_overlap	no_peak_overlap
IG_204_genes-complement	chr02	216366	216586	chr02	212538	216418	-	tandemC	204	sgd	gene	gene_id YBL007C; gene_name SLA1; gene_source sgd; gene_biotype protein_coding;	-1	221	tandem	TRUE	TRUE	YBL007C	SLA1	mild_peak	any_peak_overlap
IG_2041_genes-complement	chr07	420555	423960	chr07	419315	420631	-	divergent	2041	sgd	gene	gene_id YGL040C; gene_name HEM2; gene_source sgd; gene_biotype protein_coding;	-1	3406	divergent	TRUE	TRUE	YGL040C	HEM2	mild_peak	any_peak_overlap
IG_2041_genes-complement	chr07	420555	423960	chr07	423847	425117	+	divergent	2041	sgd	gene	gene_id YGL039W; gene_source sgd; gene_biotype protein_coding;	1	3406	divergent	TRUE	TRUE	YGL039W		mild_peak	any_peak_overlap
IG_2043_genes-complement	chr07	426804	427296	chr07	425280	426866	-	tandemC	2043	sgd	gene	gene_id YGL038C; gene_name OCH1; gene_source sgd; gene_biotype protein_coding;	-1	493	tandem	TRUE	TRUE	YGL038C	OCH1	strong_peak	any_peak_overlap
IG_2044_genes-complement	chr07	427947	428600	chr07	428541	431433	+	divergent	2044	sgd	gene	gene_id YGL036W; gene_source sgd; gene_biotype protein_coding;	1	654	divergent	TRUE	TRUE	YGL036W		strong_peak	any_peak_overlap
IG_2044_genes-complement	chr07	427947	428600	chr07	427162	428012	-	divergent	2044	sgd	gene	gene_id YGL037C; gene_name PNC1; gene_source sgd; gene_biotype protein_coding;	-1	654	divergent	TRUE	TRUE	YGL037C	PNC1	strong_peak	any_peak_overlap
IG_2046_genes-complement	chr07	433062	433213	chr07	431420	433158	-	tandemC	2046	sgd	gene	gene_id YGL035C; gene_name MIG1; gene_source sgd; gene_biotype protein_coding;	-1	152	tandem	TRUE	TRUE	YGL035C	MIG1	strong_peak	any_peak_overlap
IG_2047_genes-complement	chr07	433579	435624	chr07	433214	433579	-	divergent	2047	sgd	gene	gene_id YGL034C; gene_source sgd; gene_biotype protein_coding;	-1	2046	divergent	FALSE	TRUE	YGL034C		strong_peak	any_peak_overlap
IG_2047_genes-complement	chr07	433579	435624	chr07	435584	436548	+	divergent	2047	sgd	gene	gene_id YGL033W; gene_name HOP2; gene_source sgd; gene_biotype protein_coding;	1	2046	divergent	TRUE	TRUE	YGL033W	HOP2	strong_peak	any_peak_overlap
IG_2049_genes-complement	chr07	436833	437466	chr07	436455	436924	-	tandemC	2049	sgd	gene	gene_id YGL032C; gene_name AGA2; gene_source sgd; gene_biotype protein_coding;	-1	634	tandem	TRUE	TRUE	YGL032C	AGA2	no_peak_overlap	no_peak_overlap
IG_205_genes-complement	chr02	217129	217469	chr02	216407	217149	-	divergent	205	sgd	gene	gene_id YBL006C; gene_name LDB7; gene_source sgd; gene_biotype protein_coding;	-1	341	divergent	TRUE	TRUE	YBL006C	LDB7	mild_peak	any_peak_overlap
IG_205_genes-complement	chr02	217129	217469	chr02	217397	220530	+	divergent	205	sgd	gene	gene_id YBL005W; gene_name PDR3; gene_source sgd; gene_biotype protein_coding;	1	341	divergent	TRUE	TRUE	YBL005W	PDR3	mild_peak	any_peak_overlap
IG_2050_genes-complement	chr07	437934	439090	chr07	439028	439742	+	divergent	2050	sgd	gene	gene_id YGL030W; gene_name RPL30; gene_source sgd; gene_biotype protein_coding;	1	1157	divergent	TRUE	TRUE	YGL030W	RPL30	mild_peak	any_peak_overlap
IG_2050_genes-complement	chr07	437934	439090	chr07	437378	438429	-	divergent	2050	sgd	gene	gene_id YGL031C; gene_name RPL24A; gene_source sgd; gene_biotype protein_coding;	-1	1157	divergent	TRUE	TRUE	YGL031C	RPL24A	mild_peak	any_peak_overlap
IG_2051_genes-complement	chr07	439638	440062	chr07	440016	440602	+	tandemW	2051	sgd	gene	gene_id YGL029W; gene_name CGR1; gene_source sgd; gene_biotype protein_coding;	1	425	tandem	TRUE	TRUE	YGL029W	CGR1	no_peak_overlap	no_peak_overlap
IG_2053_genes-complement	chr07	442909	443641	chr07	441178	442987	-	tandemC	2053	sgd	gene	gene_id YGL028C; gene_name SCW11; gene_source sgd; gene_biotype protein_coding;	-1	733	tandem	TRUE	TRUE	YGL028C	SCW11	no_peak_overlap	no_peak_overlap
IG_2054_genes-complement	chr07	446143	446411	chr07	443556	446169	-	tandemC	2054	sgd	gene	gene_id YGL027C; gene_name CWH41; gene_source sgd; gene_biotype protein_coding;	-1	269	tandem	TRUE	TRUE	YGL027C	CWH41	no_peak_overlap	no_peak_overlap
IG_2055_genes-complement	chr07	448535	448763	chr07	446330	448565	-	tandemC	2055	sgd	gene	gene_id YGL026C; gene_name TRP5; gene_source sgd; gene_biotype protein_coding;	-1	229	tandem	TRUE	TRUE	YGL026C	TRP5	no_peak_overlap	no_peak_overlap
IG_2057_genes-complement	chr07	452104	452403	chr07	452334	454660	+	divergent	2057	sgd	gene	gene_id YGL022W; gene_name STT3; gene_source sgd; gene_biotype protein_coding;	1	300	divergent	TRUE	TRUE	YGL022W	STT3	no_peak_overlap	no_peak_overlap
IG_2057_genes-complement	chr07	452104	452403	chr07	450076	452138	-	divergent	2057	sgd	gene	gene_id YGL023C; gene_name PIB2; gene_source sgd; gene_biotype protein_coding;	-1	300	divergent	TRUE	TRUE	YGL023C	PIB2	no_peak_overlap	no_peak_overlap
IG_2058_genes-complement	chr07	454560	454784	chr07	454767	457167	+	tandemW	2058	sgd	gene	gene_id YGL021W; gene_name ALK1; gene_source sgd; gene_biotype protein_coding;	1	225	tandem	TRUE	TRUE	YGL021W	ALK1	no_peak_overlap	no_peak_overlap
IG_206_genes-complement	chr02	220400	227635	chr02	227543	235194	+	tandemW	206	sgd	gene	gene_id YBL004W; gene_name UTP20; gene_source sgd; gene_biotype protein_coding;	1	7236	tandem	TRUE	TRUE	YBL004W	UTP20	mild_peak	any_peak_overlap
IG_2060_genes-complement	chr07	457870	458155	chr07	457082	457915	-	divergent	2060	sgd	gene	gene_id YGL020C; gene_name GET1; gene_source sgd; gene_biotype protein_coding;	-1	286	divergent	TRUE	TRUE	YGL020C	GET1	no_peak_overlap	no_peak_overlap
IG_2060_genes-complement	chr07	457870	458155	chr07	458077	459100	+	divergent	2060	sgd	gene	gene_id YGL019W; gene_name CKB1; gene_source sgd; gene_biotype protein_coding;	1	286	divergent	TRUE	TRUE	YGL019W	CKB1	no_peak_overlap	no_peak_overlap
IG_2062_genes-complement	chr07	459664	459853	chr07	458981	459700	-	divergent	2062	sgd	gene	gene_id YGL018C; gene_name JAC1; gene_source sgd; gene_biotype protein_coding;	-1	190	divergent	TRUE	TRUE	YGL018C	JAC1	no_peak_overlap	no_peak_overlap
IG_2062_genes-complement	chr07	459664	459853	chr07	459833	461465	+	divergent	2062	sgd	gene	gene_id YGL017W; gene_name ATE1; gene_source sgd; gene_biotype protein_coding;	1	190	divergent	TRUE	TRUE	YGL017W	ATE1	no_peak_overlap	no_peak_overlap
IG_2063_genes-complement	chr07	461365	461665	chr07	461607	465086	+	tandemW	2063	sgd	gene	gene_id YGL016W; gene_name KAP122; gene_source sgd; gene_biotype protein_coding;	1	301	tandem	TRUE	TRUE	YGL016W	KAP122	no_peak_overlap	no_peak_overlap
IG_2065_genes-complement	chr07	465435	466140	chr07	464939	465532	-	divergent	2065	sgd	gene	gene_id YGL015C; gene_source sgd; gene_biotype protein_coding;	-1	706	divergent	TRUE	TRUE	YGL015C		no_peak_overlap	no_peak_overlap
IG_2065_genes-complement	chr07	465435	466140	chr07	466086	468889	+	divergent	2065	sgd	gene	gene_id YGL014W; gene_name PUF4; gene_source sgd; gene_biotype protein_coding;	1	706	divergent	TRUE	TRUE	YGL014W	PUF4	no_peak_overlap	no_peak_overlap
IG_2067_genes-complement	chr07	472298	472854	chr07	469039	472420	-	divergent	2067	sgd	gene	gene_id YGL013C; gene_name PDR1; gene_source sgd; gene_biotype protein_coding;	-1	557	divergent	TRUE	TRUE	YGL013C	PDR1	strong_peak	any_peak_overlap
IG_2067_genes-complement	chr07	472298	472854	chr07	472813	474385	+	divergent	2067	sgd	gene	gene_id YGL012W; gene_name ERG4; gene_source sgd; gene_biotype protein_coding;	1	557	divergent	TRUE	TRUE	YGL012W	ERG4	strong_peak	any_peak_overlap
IG_2069_genes-complement	chr07	475247	475544	chr07	475485	476260	+	divergent	2069	sgd	gene	gene_id YGL010W; gene_name MPO1; gene_source sgd; gene_biotype protein_coding;	1	298	divergent	TRUE	TRUE	YGL010W	MPO1	no_peak_overlap	no_peak_overlap
IG_2069_genes-complement	chr07	475247	475544	chr07	474344	475277	-	divergent	2069	sgd	gene	gene_id YGL011C; gene_name SCL1; gene_source sgd; gene_biotype protein_coding;	-1	298	divergent	TRUE	TRUE	YGL011C	SCL1	no_peak_overlap	no_peak_overlap
IG_2071_genes-complement	chr07	478652	479909	chr07	476167	478719	-	tandemC	2071	sgd	gene	gene_id YGL009C; gene_name LEU1; gene_source sgd; gene_biotype protein_coding;	-1	1258	tandem	TRUE	TRUE	YGL009C	LEU1	mild_peak	any_peak_overlap
IG_2072_genes-complement	chr07	482666	482940	chr07	479825	482773	-	tandemC	2072	sgd	gene	gene_id YGL008C; gene_name PMA1; gene_source sgd; gene_biotype protein_coding;	-1	275	tandem	TRUE	TRUE	YGL008C	PMA1	no_peak_overlap	no_peak_overlap
IG_2073_genes-complement	chr07	483027	483259	chr07	483260	483637	+	divergent	2073	sgd	gene	gene_id YGL007W; gene_name BRP1; gene_source sgd; gene_biotype protein_coding;	1	233	divergent	FALSE	TRUE	YGL007W	BRP1	strong_peak	any_peak_overlap
IG_2073_genes-complement	chr07	483027	483259	chr07	482786	483066	-	divergent	2073	sgd	gene	gene_id YGL007C-A; gene_source sgd; gene_biotype protein_coding;	-1	233	divergent	TRUE	TRUE	YGL007C-A		strong_peak	any_peak_overlap
IG_2074_genes-complement	chr07	483637	485422	chr07	485423	485533	+	tandemW	2074	sgd	gene	gene_id YGL006W-A; gene_source sgd; gene_biotype protein_coding;	1	1786	tandem	FALSE	TRUE	YGL006W-A		strong_peak	any_peak_overlap
IG_2074_genes-complement	chr07	483637	485422	chr07	485423	485533	+	tandemW	2074	sgd	gene	gene_id YGL006W-A; gene_source sgd; gene_biotype protein_coding;	1	1786	tandem	FALSE	TRUE	YGL006W-A		mild_peak	any_peak_overlap
IG_2075_genes-complement	chr07	485533	485920	chr07	485870	489560	+	tandemW	2075	sgd	gene	gene_id YGL006W; gene_name PMC1; gene_source sgd; gene_biotype protein_coding;	1	388	tandem	TRUE	TRUE	YGL006W	PMC1	mild_peak	any_peak_overlap
IG_2077_genes-complement	chr07	490547	490702	chr07	489495	490567	-	tandemC	2077	sgd	gene	gene_id YGL005C; gene_name COG7; gene_source sgd; gene_biotype protein_coding;	-1	156	tandem	TRUE	TRUE	YGL005C	COG7	no_peak_overlap	no_peak_overlap
IG_2078_genes-complement	chr07	491956	492473	chr07	490650	491971	-	tandemC	2078	sgd	gene	gene_id YGL004C; gene_name RPN14; gene_source sgd; gene_biotype protein_coding;	-1	518	tandem	TRUE	TRUE	YGL004C	RPN14	no_peak_overlap	no_peak_overlap
IG_2079_genes-complement	chr07	494174	494516	chr07	492354	494253	-	divergent	2079	sgd	gene	gene_id YGL003C; gene_name CDH1; gene_source sgd; gene_biotype protein_coding;	-1	343	divergent	TRUE	TRUE	YGL003C	CDH1	no_peak_overlap	no_peak_overlap
IG_2079_genes-complement	chr07	494174	494516	chr07	494463	495346	+	divergent	2079	sgd	gene	gene_id YGL002W; gene_name ERP6; gene_source sgd; gene_biotype protein_coding;	1	343	divergent	TRUE	TRUE	YGL002W	ERP6	no_peak_overlap	no_peak_overlap
IG_208_genes-complement	chr02	235792	236491	chr02	235215	235828	-	divergent	208	sgd	gene	gene_id YBL003C; gene_name HTA2; gene_source sgd; gene_biotype protein_coding;	-1	700	divergent	TRUE	TRUE	YBL003C	HTA2	strong_peak	any_peak_overlap
IG_208_genes-complement	chr02	235792	236491	chr02	236458	237083	+	divergent	208	sgd	gene	gene_id YBL002W; gene_name HTB2; gene_source sgd; gene_biotype protein_coding;	1	700	divergent	TRUE	TRUE	YBL002W	HTB2	strong_peak	any_peak_overlap
IG_2081_genes-complement	chr07	496502	497132	chr07	495308	496559	-	tandemC	2081	sgd	gene	gene_id YGL001C; gene_name ERG26; gene_source sgd; gene_biotype protein_coding;	-1	631	tandem	TRUE	TRUE	YGL001C	ERG26	mild_peak	any_peak_overlap
IG_2082_genes-complement	chr07	498034	498475	chr07	497060	498054	-	tandemC	2082	sgd	gene	gene_id YGR001C; gene_name EFM5; gene_source sgd; gene_biotype protein_coding;	-1	442	tandem	TRUE	TRUE	YGR001C	EFM5	no_peak_overlap	no_peak_overlap
IG_2083_genes-complement	chr07	499906	500131	chr07	498245	499917	-	divergent	2083	sgd	gene	gene_id YGR002C; gene_name SWC4; gene_source sgd; gene_biotype protein_coding;	-1	226	divergent	TRUE	TRUE	YGR002C	SWC4	no_peak_overlap	no_peak_overlap
IG_2083_genes-complement	chr07	499906	500131	chr07	500112	502588	+	divergent	2083	sgd	gene	gene_id YGR003W; gene_name CUL3; gene_source sgd; gene_biotype protein_coding;	1	226	divergent	TRUE	TRUE	YGR003W	CUL3	no_peak_overlap	no_peak_overlap
IG_2084_genes-complement	chr07	502366	502937	chr07	502888	504572	+	tandemW	2084	sgd	gene	gene_id YGR004W; gene_name PEX31; gene_source sgd; gene_biotype protein_coding;	1	572	tandem	TRUE	TRUE	YGR004W	PEX31	no_peak_overlap	no_peak_overlap
IG_2086_genes-complement	chr07	505859	506069	chr07	504553	505883	-	divergent	2086	sgd	gene	gene_id YGR005C; gene_name TFG2; gene_source sgd; gene_biotype protein_coding;	-1	211	divergent	TRUE	TRUE	YGR005C	TFG2	no_peak_overlap	no_peak_overlap
IG_2086_genes-complement	chr07	505859	506069	chr07	506070	506825	+	divergent	2086	sgd	gene	gene_id YGR006W; gene_name PRP18; gene_source sgd; gene_biotype protein_coding;	1	211	divergent	FALSE	TRUE	YGR006W	PRP18	no_peak_overlap	no_peak_overlap
IG_2087_genes-complement	chr07	506825	506968	chr07	506948	508084	+	tandemW	2087	sgd	gene	gene_id YGR007W; gene_name ECT1; gene_source sgd; gene_biotype protein_coding;	1	144	tandem	TRUE	TRUE	YGR007W	ECT1	no_peak_overlap	no_peak_overlap
IG_2089_genes-complement	chr07	508364	509046	chr07	507960	508437	-	tandemC	2089	sgd	gene	gene_id YGR008C; gene_name STF2; gene_source sgd; gene_biotype protein_coding;	-1	683	tandem	TRUE	TRUE	YGR008C	STF2	no_peak_overlap	no_peak_overlap
IG_2090_genes-complement	chr07	511002	511544	chr07	511458	512931	+	divergent	2090	sgd	gene	gene_id YGR010W; gene_name NMA2; gene_source sgd; gene_biotype protein_coding;	1	543	divergent	TRUE	TRUE	YGR010W	NMA2	no_peak_overlap	no_peak_overlap
IG_2090_genes-complement	chr07	511002	511544	chr07	508946	511049	-	divergent	2090	sgd	gene	gene_id YGR009C; gene_name SEC9; gene_source sgd; gene_biotype protein_coding;	-1	543	divergent	TRUE	TRUE	YGR009C	SEC9	no_peak_overlap	no_peak_overlap
IG_2091_genes-complement	chr07	512823	513158	chr07	513133	514417	+	tandemW	2091	sgd	gene	gene_id YGR012W; gene_name MCY1; gene_source sgd; gene_biotype protein_coding;	1	336	tandem	TRUE	TRUE	YGR012W	MCY1	no_peak_overlap	no_peak_overlap
IG_2092_genes-complement	chr07	514340	514553	chr07	514518	516648	+	tandemW	2092	sgd	gene	gene_id YGR013W; gene_name SNU71; gene_source sgd; gene_biotype protein_coding;	1	214	tandem	TRUE	TRUE	YGR013W	SNU71	no_peak_overlap	no_peak_overlap
IG_2093_genes-complement	chr07	516416	516942	chr07	516943	520863	+	tandemW	2093	sgd	gene	gene_id YGR014W; gene_name MSB2; gene_source sgd; gene_biotype protein_coding;	1	527	tandem	FALSE	TRUE	YGR014W	MSB2	strong_peak	any_peak_overlap
IG_2095_genes-complement	chr07	522076	522260	chr07	520897	522096	-	divergent	2095	sgd	gene	gene_id YGR015C; gene_source sgd; gene_biotype protein_coding;	-1	185	divergent	TRUE	TRUE	YGR015C		no_peak_overlap	no_peak_overlap
IG_2095_genes-complement	chr07	522076	522260	chr07	522227	523014	+	divergent	2095	sgd	gene	gene_id YGR016W; gene_source sgd; gene_biotype protein_coding;	1	185	divergent	TRUE	TRUE	YGR016W		no_peak_overlap	no_peak_overlap
IG_2096_genes-complement	chr07	522833	523786	chr07	523669	524799	+	tandemW	2096	sgd	gene	gene_id YGR017W; gene_source sgd; gene_biotype protein_coding;	1	954	tandem	TRUE	TRUE	YGR017W		no_peak_overlap	no_peak_overlap
IG_2097_genes-complement	chr07	524694	525228	chr07	524246	524740	-	divergent	2097	sgd	gene	gene_id YGR018C; gene_source sgd; gene_biotype protein_coding;	-1	535	divergent	TRUE	TRUE	YGR018C		no_peak_overlap	no_peak_overlap
IG_2097_genes-complement	chr07	524694	525228	chr07	525184	526738	+	divergent	2097	sgd	gene	gene_id YGR019W; gene_name UGA1; gene_source sgd; gene_biotype protein_coding;	1	535	divergent	TRUE	TRUE	YGR019W	UGA1	no_peak_overlap	no_peak_overlap
IG_2099_genes-complement	chr07	527329	527631	chr07	526834	527391	-	divergent	2099	sgd	gene	gene_id YGR020C; gene_name VMA7; gene_source sgd; gene_biotype protein_coding;	-1	303	divergent	TRUE	TRUE	YGR020C	VMA7	no_peak_overlap	no_peak_overlap
IG_2099_genes-complement	chr07	527329	527631	chr07	527605	528588	+	divergent	2099	sgd	gene	gene_id YGR021W; gene_source sgd; gene_biotype protein_coding;	1	303	divergent	TRUE	TRUE	YGR021W		no_peak_overlap	no_peak_overlap
IG_21_genes-complement	chr01	48250	48563	chr01	48537	51846	+	tandemW	21	sgd	gene	gene_id YAL051W; gene_name OAF1; gene_source sgd; gene_biotype protein_coding;	1	314	tandem	TRUE	TRUE	YAL051W	OAF1	strong_peak	any_peak_overlap
IG_210_genes-complement	chr02	237467	238940	chr02	237056	237502	-	tandemC	210	sgd	gene	gene_id YBL001C; gene_name ECM15; gene_source sgd; gene_biotype protein_coding;	-1	1474	tandem	TRUE	TRUE	YBL001C	ECM15	mild_peak	any_peak_overlap
IG_2102_genes-complement	chr07	532596	532638	chr07	532639	532941	+	divergent	2102	sgd	gene	gene_id YGR025W; gene_source sgd; gene_biotype protein_coding;	1	43	divergent	FALSE	TRUE	YGR025W		mild_peak	any_peak_overlap
IG_2102_genes-complement	chr07	532596	532638	chr07	531803	532608	-	divergent	2102	sgd	gene	gene_id YGR024C; gene_name THG1; gene_source sgd; gene_biotype protein_coding;	-1	43	divergent	TRUE	TRUE	YGR024C	THG1	mild_peak	any_peak_overlap
IG_2103_genes-complement	chr07	532941	532984	chr07	532864	533982	+	tandemW	2103	sgd	gene	gene_id YGR026W; gene_source sgd; gene_biotype protein_coding;	1	44	tandem	TRUE	TRUE	YGR026W		no_peak_overlap	no_peak_overlap
IG_2105_genes-complement	chr07	534458	542202	chr07	534050	534858	-	divergent	2105	sgd	gene	gene_id YGR027C; gene_name RPS25A; gene_source sgd; gene_biotype protein_coding;	-1	7745	divergent	TRUE	TRUE	YGR027C	RPS25A	strong_peak	any_peak_overlap
IG_2105_genes-complement	chr07	534458	542202	chr07	534050	534858	-	divergent	2105	sgd	gene	gene_id YGR027C; gene_name RPS25A; gene_source sgd; gene_biotype protein_coding;	-1	7745	divergent	TRUE	TRUE	YGR027C	RPS25A	mild_peak	any_peak_overlap
IG_2105_genes-complement	chr07	534458	542202	chr07	542144	543445	+	divergent	2105	sgd	gene	gene_id YGR028W; gene_name MSP1; gene_source sgd; gene_biotype protein_coding;	1	7745	divergent	TRUE	TRUE	YGR028W	MSP1	strong_peak	any_peak_overlap
IG_2105_genes-complement	chr07	534458	542202	chr07	542144	543445	+	divergent	2105	sgd	gene	gene_id YGR028W; gene_name MSP1; gene_source sgd; gene_biotype protein_coding;	1	7745	divergent	TRUE	TRUE	YGR028W	MSP1	mild_peak	any_peak_overlap
IG_2106_genes-complement	chr07	543291	543552	chr07	543527	544356	+	tandemW	2106	sgd	gene	gene_id YGR029W; gene_name ERV1; gene_source sgd; gene_biotype protein_coding;	1	262	tandem	TRUE	TRUE	YGR029W	ERV1	strong_peak	any_peak_overlap
IG_2108_genes-complement	chr07	546157	546440	chr07	545596	546180	-	divergent	2108	sgd	gene	gene_id YGR030C; gene_name POP6; gene_source sgd; gene_biotype protein_coding;	-1	284	divergent	TRUE	TRUE	YGR030C	POP6	no_peak_overlap	no_peak_overlap
IG_2108_genes-complement	chr07	546157	546440	chr07	546441	547469	+	divergent	2108	sgd	gene	gene_id YGR031W; gene_name IMO32; gene_source sgd; gene_biotype protein_coding;	1	284	divergent	FALSE	TRUE	YGR031W	IMO32	no_peak_overlap	no_peak_overlap
IG_2109_genes-complement	chr07	547469	548263	chr07	548172	554047	+	tandemW	2109	sgd	gene	gene_id YGR032W; gene_name GSC2; gene_source sgd; gene_biotype protein_coding;	1	795	tandem	TRUE	TRUE	YGR032W	GSC2	strong_peak	any_peak_overlap
IG_211_genes-complement	chr02	241283	241707	chr02	238836	241382	-	tandemC	211	sgd	gene	gene_id YBR001C; gene_name NTH2; gene_source sgd; gene_biotype protein_coding;	-1	425	tandem	TRUE	TRUE	YBR001C	NTH2	mild_peak	any_peak_overlap
IG_2111_genes-complement	chr07	554967	555811	chr07	555770	556795	+	divergent	2111	sgd	gene	gene_id YGR034W; gene_name RPL26B; gene_source sgd; gene_biotype protein_coding;	1	845	divergent	TRUE	TRUE	YGR034W	RPL26B	strong_peak	any_peak_overlap
IG_2111_genes-complement	chr07	554967	555811	chr07	554008	555065	-	divergent	2111	sgd	gene	gene_id YGR033C; gene_name TIM21; gene_source sgd; gene_biotype protein_coding;	-1	845	divergent	TRUE	TRUE	YGR033C	TIM21	strong_peak	any_peak_overlap
IG_2113_genes-complement	chr07	557422	557564	chr07	556910	557501	-	divergent	2113	sgd	gene	gene_id YGR035C; gene_source sgd; gene_biotype protein_coding;	-1	143	divergent	TRUE	TRUE	YGR035C		no_peak_overlap	no_peak_overlap
IG_2113_genes-complement	chr07	557422	557564	chr07	557565	557786	+	divergent	2113	sgd	gene	gene_id YGR035W-A; gene_source sgd; gene_biotype protein_coding;	1	143	divergent	FALSE	TRUE	YGR035W-A		no_peak_overlap	no_peak_overlap
IG_2115_genes-complement	chr07	558868	559730	chr07	557987	558993	-	tandemC	2115	sgd	gene	gene_id YGR036C; gene_name CAX4; gene_source sgd; gene_biotype protein_coding;	-1	863	tandem	TRUE	TRUE	YGR036C	CAX4	no_peak_overlap	no_peak_overlap
IG_2116_genes-complement	chr07	559994	560681	chr07	559547	560047	-	divergent	2116	sgd	gene	gene_id YGR037C; gene_name ACB1; gene_source sgd; gene_biotype protein_coding;	-1	688	divergent	TRUE	TRUE	YGR037C	ACB1	no_peak_overlap	no_peak_overlap
IG_2116_genes-complement	chr07	559994	560681	chr07	560554	561501	+	divergent	2116	sgd	gene	gene_id YGR038W; gene_name ORM1; gene_source sgd; gene_biotype protein_coding;	1	688	divergent	TRUE	TRUE	YGR038W	ORM1	no_peak_overlap	no_peak_overlap
IG_2117_genes-complement	chr07	561350	574887	chr07	574783	575252	+	tandemW	2117	sgd	gene	gene_id YGR039W; gene_source sgd; gene_biotype protein_coding;	1	13538	tandem	TRUE	TRUE	YGR039W		mild_peak	any_peak_overlap
IG_2118_genes-complement	chr07	575199	575397	chr07	575369	576624	+	tandemW	2118	sgd	gene	gene_id YGR040W; gene_name KSS1; gene_source sgd; gene_biotype protein_coding;	1	199	tandem	TRUE	TRUE	YGR040W	KSS1	no_peak_overlap	no_peak_overlap
IG_2119_genes-complement	chr07	576504	577486	chr07	577418	579254	+	tandemW	2119	sgd	gene	gene_id YGR041W; gene_name BUD9; gene_source sgd; gene_biotype protein_coding;	1	983	tandem	TRUE	TRUE	YGR041W	BUD9	strong_peak	any_peak_overlap
IG_212_genes-complement	chr02	242568	242808	chr02	242781	244365	+	divergent	212	sgd	gene	gene_id YBR003W; gene_name COQ1; gene_source sgd; gene_biotype protein_coding;	1	241	divergent	TRUE	TRUE	YBR003W	COQ1	mild_peak	any_peak_overlap
IG_212_genes-complement	chr02	242568	242808	chr02	241553	242589	-	divergent	212	sgd	gene	gene_id YBR002C; gene_name RER2; gene_source sgd; gene_biotype protein_coding;	-1	241	divergent	TRUE	TRUE	YBR002C	RER2	mild_peak	any_peak_overlap
IG_2120_genes-complement	chr07	579130	579475	chr07	579448	580390	+	tandemW	2120	sgd	gene	gene_id YGR042W; gene_name MTE1; gene_source sgd; gene_biotype protein_coding;	1	346	tandem	TRUE	TRUE	YGR042W	MTE1	no_peak_overlap	no_peak_overlap
IG_2122_genes-complement	chr07	581436	582989	chr07	580286	581465	-	tandemC	2122	sgd	gene	gene_id YGR043C; gene_name NQM1; gene_source sgd; gene_biotype protein_coding;	-1	1554	tandem	TRUE	TRUE	YGR043C	NQM1	strong_peak	any_peak_overlap
IG_2123_genes-complement	chr07	583892	583933	chr07	582779	583976	-	tandemC	2123	sgd	gene	gene_id YGR044C; gene_name RME1; gene_source sgd; gene_biotype protein_coding;	-1	42	tandem	TRUE	TRUE	YGR044C	RME1	no_peak_overlap	no_peak_overlap
IG_2124_genes-complement	chr07	584296	584894	chr07	583903	584375	-	divergent	2124	sgd	gene	gene_id YGR045C; gene_source sgd; gene_biotype protein_coding;	-1	599	divergent	TRUE	TRUE	YGR045C		mild_peak	any_peak_overlap
IG_2124_genes-complement	chr07	584296	584894	chr07	584803	586225	+	divergent	2124	sgd	gene	gene_id YGR046W; gene_name TAM41; gene_source sgd; gene_biotype protein_coding;	1	599	divergent	TRUE	TRUE	YGR046W	TAM41	mild_peak	any_peak_overlap
IG_2126_genes-complement	chr07	589469	589825	chr07	589769	590996	+	divergent	2126	sgd	gene	gene_id YGR048W; gene_name UFD1; gene_source sgd; gene_biotype protein_coding;	1	357	divergent	TRUE	TRUE	YGR048W	UFD1	strong_peak	any_peak_overlap
IG_2126_genes-complement	chr07	589469	589825	chr07	586318	589496	-	divergent	2126	sgd	gene	gene_id YGR047C; gene_name TFC4; gene_source sgd; gene_biotype protein_coding;	-1	357	divergent	TRUE	TRUE	YGR047C	TFC4	strong_peak	any_peak_overlap
IG_2127_genes-complement	chr07	590911	591313	chr07	591259	592049	+	tandemW	2127	sgd	gene	gene_id YGR049W; gene_name SCM4; gene_source sgd; gene_biotype protein_coding;	1	403	tandem	TRUE	TRUE	YGR049W	SCM4	mild_peak	any_peak_overlap
IG_2129_genes-complement	chr07	592442	592905	chr07	591953	592508	-	tandemC	2129	sgd	gene	gene_id YGR050C; gene_source sgd; gene_biotype protein_coding;	-1	464	tandem	TRUE	TRUE	YGR050C		strong_peak	any_peak_overlap
IG_2130_genes-complement	chr07	593229	593595	chr07	592906	593229	-	divergent	2130	sgd	gene	gene_id YGR051C; gene_source sgd; gene_biotype protein_coding;	-1	367	divergent	FALSE	TRUE	YGR051C		strong_peak	any_peak_overlap
IG_2130_genes-complement	chr07	593229	593595	chr07	593464	594882	+	divergent	2130	sgd	gene	gene_id YGR052W; gene_name FMP48; gene_source sgd; gene_biotype protein_coding;	1	367	divergent	TRUE	TRUE	YGR052W	FMP48	strong_peak	any_peak_overlap
IG_2132_genes-complement	chr07	595837	596692	chr07	596614	598797	+	divergent	2132	sgd	gene	gene_id YGR054W; gene_source sgd; gene_biotype protein_coding;	1	856	divergent	TRUE	TRUE	YGR054W		no_peak_overlap	no_peak_overlap
IG_2132_genes-complement	chr07	595837	596692	chr07	594891	595927	-	divergent	2132	sgd	gene	gene_id YGR053C; gene_source sgd; gene_biotype protein_coding;	-1	856	divergent	TRUE	TRUE	YGR053C		no_peak_overlap	no_peak_overlap
IG_2133_genes-complement	chr07	598621	599416	chr07	599380	601272	+	tandemW	2133	sgd	gene	gene_id YGR055W; gene_name MUP1; gene_source sgd; gene_biotype protein_coding;	1	796	tandem	TRUE	TRUE	YGR055W	MUP1	mild_peak	any_peak_overlap
IG_2134_genes-complement	chr07	601141	601660	chr07	601613	604542	+	tandemW	2134	sgd	gene	gene_id YGR056W; gene_name RSC1; gene_source sgd; gene_biotype protein_coding;	1	520	tandem	TRUE	TRUE	YGR056W	RSC1	no_peak_overlap	no_peak_overlap
IG_2136_genes-complement	chr07	605501	606135	chr07	606109	607376	+	divergent	2136	sgd	gene	gene_id YGR058W; gene_name PEF1; gene_source sgd; gene_biotype protein_coding;	1	635	divergent	TRUE	TRUE	YGR058W	PEF1	no_peak_overlap	no_peak_overlap
IG_2136_genes-complement	chr07	605501	606135	chr07	604648	605572	-	divergent	2136	sgd	gene	gene_id YGR057C; gene_name LST7; gene_source sgd; gene_biotype protein_coding;	-1	635	divergent	TRUE	TRUE	YGR057C	LST7	no_peak_overlap	no_peak_overlap
IG_2137_genes-complement	chr07	607143	607562	chr07	607439	609182	+	tandemW	2137	sgd	gene	gene_id YGR059W; gene_name SPR3; gene_source sgd; gene_biotype protein_coding;	1	420	tandem	TRUE	TRUE	YGR059W	SPR3	no_peak_overlap	no_peak_overlap
IG_2138_genes-complement	chr07	609101	610563	chr07	610503	611635	+	tandemW	2138	sgd	gene	gene_id YGR060W; gene_name ERG25; gene_source sgd; gene_biotype protein_coding;	1	1463	tandem	TRUE	TRUE	YGR060W	ERG25	strong_peak	any_peak_overlap
IG_214_genes-complement	chr02	245667	245905	chr02	244272	245706	-	divergent	214	sgd	gene	gene_id YBR004C; gene_name GPI18; gene_source sgd; gene_biotype protein_coding;	-1	239	divergent	TRUE	TRUE	YBR004C	GPI18	no_peak_overlap	no_peak_overlap
IG_214_genes-complement	chr02	245667	245905	chr02	245853	246701	+	divergent	214	sgd	gene	gene_id YBR005W; gene_name RCR1; gene_source sgd; gene_biotype protein_coding;	1	239	divergent	TRUE	TRUE	YBR005W	RCR1	no_peak_overlap	no_peak_overlap
IG_2140_genes-complement	chr07	615965	616327	chr07	611790	616071	-	tandemC	2140	sgd	gene	gene_id YGR061C; gene_name ADE6; gene_source sgd; gene_biotype protein_coding;	-1	363	tandem	TRUE	TRUE	YGR061C	ADE6	no_peak_overlap	no_peak_overlap
IG_2141_genes-complement	chr07	617278	617515	chr07	616253	617298	-	tandemC	2141	sgd	gene	gene_id YGR062C; gene_name COX18; gene_source sgd; gene_biotype protein_coding;	-1	238	tandem	TRUE	TRUE	YGR062C	COX18	no_peak_overlap	no_peak_overlap
IG_2143_genes-complement	chr07	619858	620920	chr07	617979	619907	-	tandemC	2143	sgd	gene	gene_id YGR065C; gene_name VHT1; gene_source sgd; gene_biotype protein_coding;	-1	1063	tandem	TRUE	TRUE	YGR065C	VHT1	no_peak_overlap	no_peak_overlap
IG_2144_genes-complement	chr07	621799	622371	chr07	620758	621899	-	tandemC	2144	sgd	gene	gene_id YGR066C; gene_source sgd; gene_biotype protein_coding;	-1	573	tandem	TRUE	TRUE	YGR066C		no_peak_overlap	no_peak_overlap
IG_2145_genes-complement	chr07	624786	625323	chr07	622262	624849	-	tandemC	2145	sgd	gene	gene_id YGR067C; gene_source sgd; gene_biotype protein_coding;	-1	538	tandem	TRUE	TRUE	YGR067C		strong_peak	any_peak_overlap
IG_2146_genes-complement	chr07	627418	627805	chr07	627742	631409	+	tandemW	2146	sgd	gene	gene_id YGR070W; gene_name ROM1; gene_source sgd; gene_biotype protein_coding;	1	388	tandem	TRUE	TRUE	YGR070W	ROM1	no_peak_overlap	no_peak_overlap
IG_2148_genes-complement	chr07	634063	634303	chr07	631304	634111	-	divergent	2148	sgd	gene	gene_id YGR071C; gene_name ENV11; gene_source sgd; gene_biotype protein_coding;	-1	241	divergent	TRUE	TRUE	YGR071C	ENV11	no_peak_overlap	no_peak_overlap
IG_2148_genes-complement	chr07	634063	634303	chr07	634252	635550	+	divergent	2148	sgd	gene	gene_id YGR072W; gene_name UPF3; gene_source sgd; gene_biotype protein_coding;	1	241	divergent	TRUE	TRUE	YGR072W	UPF3	no_peak_overlap	no_peak_overlap
IG_215_genes-complement	chr02	246547	247009	chr02	246956	248644	+	tandemW	215	sgd	gene	gene_id YBR006W; gene_name UGA2; gene_source sgd; gene_biotype protein_coding;	1	463	tandem	TRUE	TRUE	YBR006W	UGA2	mild_peak	any_peak_overlap
IG_2150_genes-complement	chr07	636875	637103	chr07	636147	636875	-	tandemC	2150	sgd	gene	gene_id YGR075C; gene_name PRP38; gene_source sgd; gene_biotype protein_coding;	-1	229	tandem	FALSE	TRUE	YGR075C	PRP38	no_peak_overlap	no_peak_overlap
IG_2151_genes-complement	chr07	637577	637743	chr07	637007	637630	-	tandemC	2151	sgd	gene	gene_id YGR076C; gene_name MRPL25; gene_source sgd; gene_biotype protein_coding;	-1	167	tandem	TRUE	TRUE	YGR076C	MRPL25	no_peak_overlap	no_peak_overlap
IG_2152_genes-complement	chr07	639513	639771	chr07	637689	639542	-	tandemC	2152	sgd	gene	gene_id YGR077C; gene_name PEX8; gene_source sgd; gene_biotype protein_coding;	-1	259	tandem	TRUE	TRUE	YGR077C	PEX8	no_peak_overlap	no_peak_overlap
IG_2153_genes-complement	chr07	640371	640719	chr07	640678	641933	+	divergent	2153	sgd	gene	gene_id YGR079W; gene_source sgd; gene_biotype protein_coding;	1	349	divergent	TRUE	TRUE	YGR079W		mild_peak	any_peak_overlap
IG_2153_genes-complement	chr07	640371	640719	chr07	639700	640408	-	divergent	2153	sgd	gene	gene_id YGR078C; gene_name PAC10; gene_source sgd; gene_biotype protein_coding;	-1	349	divergent	TRUE	TRUE	YGR078C	PAC10	mild_peak	any_peak_overlap
IG_2154_genes-complement	chr07	641832	642009	chr07	641982	643115	+	tandemW	2154	sgd	gene	gene_id YGR080W; gene_name TWF1; gene_source sgd; gene_biotype protein_coding;	1	178	tandem	TRUE	TRUE	YGR080W	TWF1	no_peak_overlap	no_peak_overlap
IG_2156_genes-complement	chr07	643780	644043	chr07	643030	643810	-	divergent	2156	sgd	gene	gene_id YGR081C; gene_name SLX9; gene_source sgd; gene_biotype protein_coding;	-1	264	divergent	TRUE	TRUE	YGR081C	SLX9	no_peak_overlap	no_peak_overlap
IG_2156_genes-complement	chr07	643780	644043	chr07	643996	644743	+	divergent	2156	sgd	gene	gene_id YGR082W; gene_name TOM20; gene_source sgd; gene_biotype protein_coding;	1	264	divergent	TRUE	TRUE	YGR082W	TOM20	no_peak_overlap	no_peak_overlap
IG_2158_genes-complement	chr07	646815	647122	chr07	644736	646865	-	tandemC	2158	sgd	gene	gene_id YGR083C; gene_name GCD2; gene_source sgd; gene_biotype protein_coding;	-1	308	tandem	TRUE	TRUE	YGR083C	GCD2	no_peak_overlap	no_peak_overlap
IG_2159_genes-complement	chr07	648142	648382	chr07	647044	648207	-	tandemC	2159	sgd	gene	gene_id YGR084C; gene_name MRP13; gene_source sgd; gene_biotype protein_coding;	-1	241	tandem	TRUE	TRUE	YGR084C	MRP13	no_peak_overlap	no_peak_overlap
IG_2160_genes-complement	chr07	648907	649597	chr07	648299	648936	-	tandemC	2160	sgd	gene	gene_id YGR085C; gene_name RPL11B; gene_source sgd; gene_biotype protein_coding;	-1	691	tandem	TRUE	TRUE	YGR085C	RPL11B	strong_peak	any_peak_overlap
IG_2161_genes-complement	chr07	650617	651289	chr07	649467	650717	-	tandemC	2161	sgd	gene	gene_id YGR086C; gene_name PIL1; gene_source sgd; gene_biotype protein_coding;	-1	673	tandem	TRUE	TRUE	YGR086C	PIL1	strong_peak	any_peak_overlap
IG_2162_genes-complement	chr07	652981	654633	chr07	651177	653026	-	divergent	2162	sgd	gene	gene_id YGR087C; gene_name PDC6; gene_source sgd; gene_biotype protein_coding;	-1	1653	divergent	TRUE	TRUE	YGR087C	PDC6	strong_peak	any_peak_overlap
IG_2162_genes-complement	chr07	652981	654633	chr07	651177	653026	-	divergent	2162	sgd	gene	gene_id YGR087C; gene_name PDC6; gene_source sgd; gene_biotype protein_coding;	-1	1653	divergent	TRUE	TRUE	YGR087C	PDC6	mild_peak	any_peak_overlap
IG_2162_genes-complement	chr07	652981	654633	chr07	654605	656410	+	divergent	2162	sgd	gene	gene_id YGR088W; gene_name CTT1; gene_source sgd; gene_biotype protein_coding;	1	1653	divergent	TRUE	TRUE	YGR088W	CTT1	strong_peak	any_peak_overlap
IG_2162_genes-complement	chr07	652981	654633	chr07	654605	656410	+	divergent	2162	sgd	gene	gene_id YGR088W; gene_name CTT1; gene_source sgd; gene_biotype protein_coding;	1	1653	divergent	TRUE	TRUE	YGR088W	CTT1	mild_peak	any_peak_overlap
IG_2163_genes-complement	chr07	656322	656959	chr07	656907	659888	+	tandemW	2163	sgd	gene	gene_id YGR089W; gene_name NNF2; gene_source sgd; gene_biotype protein_coding;	1	638	tandem	TRUE	TRUE	YGR089W	NNF2	no_peak_overlap	no_peak_overlap
IG_2164_genes-complement	chr07	659770	662357	chr07	662292	666169	+	tandemW	2164	sgd	gene	gene_id YGR090W; gene_name UTP22; gene_source sgd; gene_biotype protein_coding;	1	2588	tandem	TRUE	TRUE	YGR090W	UTP22	no_peak_overlap	no_peak_overlap
IG_2165_genes-complement	chr07	666071	666340	chr07	666272	667948	+	tandemW	2165	sgd	gene	gene_id YGR091W; gene_name PRP31; gene_source sgd; gene_biotype protein_coding;	1	270	tandem	TRUE	TRUE	YGR091W	PRP31	no_peak_overlap	no_peak_overlap
IG_2166_genes-complement	chr07	667825	668188	chr07	668121	670067	+	tandemW	2166	sgd	gene	gene_id YGR092W; gene_name DBF2; gene_source sgd; gene_biotype protein_coding;	1	364	tandem	TRUE	TRUE	YGR092W	DBF2	mild_peak	any_peak_overlap
IG_2167_genes-complement	chr07	669907	670387	chr07	670324	671998	+	tandemW	2167	sgd	gene	gene_id YGR093W; gene_name DRN1; gene_source sgd; gene_biotype protein_coding;	1	481	tandem	TRUE	TRUE	YGR093W	DRN1	no_peak_overlap	no_peak_overlap
IG_2168_genes-complement	chr07	671911	672185	chr07	672168	675587	+	tandemW	2168	sgd	gene	gene_id YGR094W; gene_name VAS1; gene_source sgd; gene_biotype protein_coding;	1	275	tandem	TRUE	TRUE	YGR094W	VAS1	no_peak_overlap	no_peak_overlap
IG_217_genes-complement	chr02	251016	252562	chr02	248663	251099	-	tandemC	217	sgd	gene	gene_id YBR007C; gene_name DSF2; gene_source sgd; gene_biotype protein_coding;	-1	1547	tandem	TRUE	TRUE	YBR007C	DSF2	mild_peak	any_peak_overlap
IG_2170_genes-complement	chr07	676342	676620	chr07	675608	676395	-	divergent	2170	sgd	gene	gene_id YGR095C; gene_name RRP46; gene_source sgd; gene_biotype protein_coding;	-1	279	divergent	TRUE	TRUE	YGR095C	RRP46	no_peak_overlap	no_peak_overlap
IG_2170_genes-complement	chr07	676342	676620	chr07	676574	677637	+	divergent	2170	sgd	gene	gene_id YGR096W; gene_name TPC1; gene_source sgd; gene_biotype protein_coding;	1	279	divergent	TRUE	TRUE	YGR096W	TPC1	no_peak_overlap	no_peak_overlap
IG_2171_genes-complement	chr07	677565	678694	chr07	678640	682293	+	tandemW	2171	sgd	gene	gene_id YGR097W; gene_name ASK10; gene_source sgd; gene_biotype protein_coding;	1	1130	tandem	TRUE	TRUE	YGR097W	ASK10	strong_peak	any_peak_overlap
IG_2173_genes-complement	chr07	687458	687898	chr07	682384	687530	-	divergent	2173	sgd	gene	gene_id YGR098C; gene_name ESP1; gene_source sgd; gene_biotype protein_coding;	-1	441	divergent	TRUE	TRUE	YGR098C	ESP1	no_peak_overlap	no_peak_overlap
IG_2173_genes-complement	chr07	687458	687898	chr07	687842	690036	+	divergent	2173	sgd	gene	gene_id YGR099W; gene_name TEL2; gene_source sgd; gene_biotype protein_coding;	1	441	divergent	TRUE	TRUE	YGR099W	TEL2	no_peak_overlap	no_peak_overlap
IG_2174_genes-complement	chr07	689965	690244	chr07	690160	693209	+	tandemW	2174	sgd	gene	gene_id YGR100W; gene_name MDR1; gene_source sgd; gene_biotype protein_coding;	1	280	tandem	TRUE	TRUE	YGR100W	MDR1	no_peak_overlap	no_peak_overlap
IG_2175_genes-complement	chr07	693097	693362	chr07	693316	694512	+	tandemW	2175	sgd	gene	gene_id YGR101W; gene_name PCP1; gene_source sgd; gene_biotype protein_coding;	1	266	tandem	TRUE	TRUE	YGR101W	PCP1	no_peak_overlap	no_peak_overlap
IG_2177_genes-complement	chr07	695135	695416	chr07	695381	697389	+	divergent	2177	sgd	gene	gene_id YGR103W; gene_name NOP7; gene_source sgd; gene_biotype protein_coding;	1	282	divergent	TRUE	TRUE	YGR103W	NOP7	no_peak_overlap	no_peak_overlap
IG_2177_genes-complement	chr07	695135	695416	chr07	694423	695146	-	divergent	2177	sgd	gene	gene_id YGR102C; gene_name GTF1; gene_source sgd; gene_biotype protein_coding;	-1	282	divergent	TRUE	TRUE	YGR102C	GTF1	no_peak_overlap	no_peak_overlap
IG_2179_genes-complement	chr07	698368	698598	chr07	697346	698419	-	divergent	2179	sgd	gene	gene_id YGR104C; gene_name SRB5; gene_source sgd; gene_biotype protein_coding;	-1	231	divergent	TRUE	TRUE	YGR104C	SRB5	no_peak_overlap	no_peak_overlap
IG_2179_genes-complement	chr07	698368	698598	chr07	698550	699007	+	divergent	2179	sgd	gene	gene_id YGR105W; gene_name VMA21; gene_source sgd; gene_biotype protein_coding;	1	231	divergent	TRUE	TRUE	YGR105W	VMA21	no_peak_overlap	no_peak_overlap
IG_218_genes-complement	chr02	254209	255372	chr02	252435	254296	-	tandemC	218	sgd	gene	gene_id YBR008C; gene_name FLR1; gene_source sgd; gene_biotype protein_coding;	-1	1164	tandem	TRUE	TRUE	YBR008C	FLR1	no_peak_overlap	no_peak_overlap
IG_2181_genes-complement	chr07	699786	702666	chr07	702589	703349	+	divergent	2181	sgd	gene	gene_id YGR107W; gene_source sgd; gene_biotype protein_coding;	1	2881	divergent	TRUE	TRUE	YGR107W		mild_peak	any_peak_overlap
IG_2181_genes-complement	chr07	699786	702666	chr07	698894	699842	-	divergent	2181	sgd	gene	gene_id YGR106C; gene_name VOA1; gene_source sgd; gene_biotype protein_coding;	-1	2881	divergent	TRUE	TRUE	YGR106C	VOA1	mild_peak	any_peak_overlap
IG_2182_genes-complement	chr07	703116	703635	chr07	703537	705220	+	tandemW	2182	sgd	gene	gene_id YGR108W; gene_name CLB1; gene_source sgd; gene_biotype protein_coding;	1	520	tandem	TRUE	TRUE	YGR108W	CLB1	no_peak_overlap	no_peak_overlap
IG_2184_genes-complement	chr07	706501	713708	chr07	713664	715137	+	divergent	2184	sgd	gene	gene_id YGR110W; gene_name CLD1; gene_source sgd; gene_biotype protein_coding;	1	7208	divergent	TRUE	TRUE	YGR110W	CLD1	strong_peak	any_peak_overlap
IG_2184_genes-complement	chr07	706501	713708	chr07	705246	706576	-	divergent	2184	sgd	gene	gene_id YGR109C; gene_name CLB6; gene_source sgd; gene_biotype protein_coding;	-1	7208	divergent	TRUE	TRUE	YGR109C	CLB6	strong_peak	any_peak_overlap
IG_2185_genes-complement	chr07	715046	715827	chr07	715769	717155	+	tandemW	2185	sgd	gene	gene_id YGR111W; gene_source sgd; gene_biotype protein_coding;	1	782	tandem	TRUE	TRUE	YGR111W		no_peak_overlap	no_peak_overlap
IG_2186_genes-complement	chr07	717030	717357	chr07	717301	718698	+	tandemW	2186	sgd	gene	gene_id YGR112W; gene_name SHY1; gene_source sgd; gene_biotype protein_coding;	1	328	tandem	TRUE	TRUE	YGR112W	SHY1	no_peak_overlap	no_peak_overlap
IG_2187_genes-complement	chr07	718527	718892	chr07	718834	720156	+	tandemW	2187	sgd	gene	gene_id YGR113W; gene_name DAM1; gene_source sgd; gene_biotype protein_coding;	1	366	tandem	TRUE	TRUE	YGR113W	DAM1	no_peak_overlap	no_peak_overlap
IG_219_genes-complement	chr02	255684	256330	chr02	255200	255719	-	divergent	219	sgd	gene	gene_id YBR009C; gene_name HHF1; gene_source sgd; gene_biotype protein_coding;	-1	647	divergent	TRUE	TRUE	YBR009C	HHF1	strong_peak	any_peak_overlap
IG_219_genes-complement	chr02	255684	256330	chr02	256305	256896	+	divergent	219	sgd	gene	gene_id YBR010W; gene_name HHT1; gene_source sgd; gene_biotype protein_coding;	1	647	divergent	TRUE	TRUE	YBR010W	HHT1	strong_peak	any_peak_overlap
IG_2190_genes-complement	chr07	726479	726973	chr07	724821	726499	-	divergent	2190	sgd	gene	gene_id YGR117C; gene_source sgd; gene_biotype protein_coding;	-1	495	divergent	TRUE	TRUE	YGR117C		mild_peak	any_peak_overlap
IG_2190_genes-complement	chr07	726479	726973	chr07	726950	727907	+	divergent	2190	sgd	gene	gene_id YGR118W; gene_name RPS23A; gene_source sgd; gene_biotype protein_coding;	1	495	divergent	TRUE	TRUE	YGR118W	RPS23A	mild_peak	any_peak_overlap
IG_2192_genes-complement	chr07	729671	730032	chr07	727968	729751	-	tandemC	2192	sgd	gene	gene_id YGR119C; gene_name NUP57; gene_source sgd; gene_biotype protein_coding;	-1	362	tandem	TRUE	TRUE	YGR119C	NUP57	no_peak_overlap	no_peak_overlap
IG_2193_genes-complement	chr07	730821	731448	chr07	729862	730855	-	tandemC	2193	sgd	gene	gene_id YGR120C; gene_name COG2; gene_source sgd; gene_biotype protein_coding;	-1	628	tandem	TRUE	TRUE	YGR120C	COG2	strong_peak	any_peak_overlap
IG_2194_genes-complement	chr07	732927	733411	chr07	733295	733660	+	divergent	2194	sgd	gene	gene_id YGR121W-A; gene_source sgd; gene_biotype protein_coding;	1	485	divergent	TRUE	TRUE	YGR121W-A		strong_peak	any_peak_overlap
IG_2194_genes-complement	chr07	732927	733411	chr07	731311	732973	-	divergent	2194	sgd	gene	gene_id YGR121C; gene_name MEP1; gene_source sgd; gene_biotype protein_coding;	-1	485	divergent	TRUE	TRUE	YGR121C	MEP1	strong_peak	any_peak_overlap
IG_2195_genes-complement	chr07	733627	733934	chr07	733904	735292	+	tandemW	2195	sgd	gene	gene_id YGR122W; gene_source sgd; gene_biotype protein_coding;	1	308	tandem	TRUE	TRUE	YGR122W		strong_peak	any_peak_overlap
IG_2197_genes-complement	chr07	735758	736661	chr07	735402	735834	-	tandemC	2197	sgd	gene	gene_id YGR122C-A; gene_source sgd; gene_biotype protein_coding;	-1	904	tandem	TRUE	TRUE	YGR122C-A		no_peak_overlap	no_peak_overlap
IG_2198_genes-complement	chr07	738203	739943	chr07	736504	738259	-	divergent	2198	sgd	gene	gene_id YGR123C; gene_name PPT1; gene_source sgd; gene_biotype protein_coding;	-1	1741	divergent	TRUE	TRUE	YGR123C	PPT1	mild_peak	any_peak_overlap
IG_2198_genes-complement	chr07	738203	739943	chr07	739911	741838	+	divergent	2198	sgd	gene	gene_id YGR124W; gene_name ASN2; gene_source sgd; gene_biotype protein_coding;	1	1741	divergent	TRUE	TRUE	YGR124W	ASN2	mild_peak	any_peak_overlap
IG_2199_genes-complement	chr07	741662	742324	chr07	742260	745586	+	tandemW	2199	sgd	gene	gene_id YGR125W; gene_source sgd; gene_biotype protein_coding;	1	663	tandem	TRUE	TRUE	YGR125W		mild_peak	any_peak_overlap
IG_2200_genes-complement	chr07	745435	745834	chr07	745835	746527	+	tandemW	2200	sgd	gene	gene_id YGR126W; gene_source sgd; gene_biotype protein_coding;	1	400	tandem	FALSE	TRUE	YGR126W		no_peak_overlap	no_peak_overlap
IG_2201_genes-complement	chr07	746527	746797	chr07	746751	747946	+	tandemW	2201	sgd	gene	gene_id YGR127W; gene_source sgd; gene_biotype protein_coding;	1	271	tandem	TRUE	TRUE	YGR127W		no_peak_overlap	no_peak_overlap
IG_2203_genes-complement	chr07	750091	750399	chr07	747854	750126	-	divergent	2203	sgd	gene	gene_id YGR128C; gene_name UTP8; gene_source sgd; gene_biotype protein_coding;	-1	309	divergent	TRUE	TRUE	YGR128C	UTP8	no_peak_overlap	no_peak_overlap
IG_2203_genes-complement	chr07	750091	750399	chr07	750366	751131	+	divergent	2203	sgd	gene	gene_id YGR129W; gene_name SYF2; gene_source sgd; gene_biotype protein_coding;	1	309	divergent	TRUE	TRUE	YGR129W	SYF2	no_peak_overlap	no_peak_overlap
IG_2205_genes-complement	chr07	753844	754725	chr07	754642	755378	+	divergent	2205	sgd	gene	gene_id YGR131W; gene_name FHN1; gene_source sgd; gene_biotype protein_coding;	1	882	divergent	TRUE	TRUE	YGR131W	FHN1	mild_peak	any_peak_overlap
IG_2205_genes-complement	chr07	753844	754725	chr07	751220	753931	-	divergent	2205	sgd	gene	gene_id YGR130C; gene_source sgd; gene_biotype protein_coding;	-1	882	divergent	TRUE	TRUE	YGR130C		mild_peak	any_peak_overlap
IG_2207_genes-complement	chr07	756452	756895	chr07	755387	756502	-	divergent	2207	sgd	gene	gene_id YGR132C; gene_name PHB1; gene_source sgd; gene_biotype protein_coding;	-1	444	divergent	TRUE	TRUE	YGR132C	PHB1	no_peak_overlap	no_peak_overlap
IG_2207_genes-complement	chr07	756452	756895	chr07	756782	757653	+	divergent	2207	sgd	gene	gene_id YGR133W; gene_name PEX4; gene_source sgd; gene_biotype protein_coding;	1	444	divergent	TRUE	TRUE	YGR133W	PEX4	no_peak_overlap	no_peak_overlap
IG_2208_genes-complement	chr07	757447	757769	chr07	757631	761284	+	tandemW	2208	sgd	gene	gene_id YGR134W; gene_name CAF130; gene_source sgd; gene_biotype protein_coding;	1	323	tandem	TRUE	TRUE	YGR134W	CAF130	no_peak_overlap	no_peak_overlap
IG_2209_genes-complement	chr07	761138	761391	chr07	761325	762255	+	tandemW	2209	sgd	gene	gene_id YGR135W; gene_name PRE9; gene_source sgd; gene_biotype protein_coding;	1	254	tandem	TRUE	TRUE	YGR135W	PRE9	no_peak_overlap	no_peak_overlap
IG_221_genes-complement	chr02	257975	259146	chr02	256990	258005	-	tandemC	221	sgd	gene	gene_id YBR011C; gene_name IPP1; gene_source sgd; gene_biotype protein_coding;	-1	1172	tandem	TRUE	TRUE	YBR011C	IPP1	no_peak_overlap	no_peak_overlap
IG_2210_genes-complement	chr07	762168	762427	chr07	762408	763400	+	tandemW	2210	sgd	gene	gene_id YGR136W; gene_name LSB1; gene_source sgd; gene_biotype protein_coding;	1	260	tandem	TRUE	TRUE	YGR136W	LSB1	no_peak_overlap	no_peak_overlap
IG_2212_genes-complement	chr07	765606	765725	chr07	765726	766064	+	divergent	2212	sgd	gene	gene_id YGR139W; gene_source sgd; gene_biotype protein_coding;	1	120	divergent	FALSE	TRUE	YGR139W		no_peak_overlap	no_peak_overlap
IG_2212_genes-complement	chr07	765606	765725	chr07	763623	765660	-	divergent	2212	sgd	gene	gene_id YGR138C; gene_name TPO2; gene_source sgd; gene_biotype protein_coding;	-1	120	divergent	TRUE	TRUE	YGR138C	TPO2	no_peak_overlap	no_peak_overlap
IG_2213_genes-complement	chr07	766064	767428	chr07	767370	770380	+	tandemW	2213	sgd	gene	gene_id YGR140W; gene_name CBF2; gene_source sgd; gene_biotype protein_coding;	1	1365	tandem	TRUE	TRUE	YGR140W	CBF2	strong_peak	any_peak_overlap
IG_2214_genes-complement	chr07	770299	770568	chr07	770543	772048	+	tandemW	2214	sgd	gene	gene_id YGR141W; gene_name VPS62; gene_source sgd; gene_biotype protein_coding;	1	270	tandem	TRUE	TRUE	YGR141W	VPS62	no_peak_overlap	no_peak_overlap
IG_2215_genes-complement	chr07	771972	772453	chr07	772358	773786	+	tandemW	2215	sgd	gene	gene_id YGR142W; gene_name BTN2; gene_source sgd; gene_biotype protein_coding;	1	482	tandem	TRUE	TRUE	YGR142W	BTN2	mild_peak	any_peak_overlap
IG_2216_genes-complement	chr07	773686	775192	chr07	775114	777668	+	tandemW	2216	sgd	gene	gene_id YGR143W; gene_name SKN1; gene_source sgd; gene_biotype protein_coding;	1	1507	tandem	TRUE	TRUE	YGR143W	SKN1	strong_peak	any_peak_overlap
IG_2217_genes-complement	chr07	777508	780398	chr07	780312	781484	+	tandemW	2217	sgd	gene	gene_id YGR144W; gene_name THI4; gene_source sgd; gene_biotype protein_coding;	1	2891	tandem	TRUE	TRUE	YGR144W	THI4	mild_peak	any_peak_overlap
IG_2218_genes-complement	chr07	781379	781766	chr07	781728	783971	+	tandemW	2218	sgd	gene	gene_id YGR145W; gene_name ENP2; gene_source sgd; gene_biotype protein_coding;	1	388	tandem	TRUE	TRUE	YGR145W	ENP2	no_peak_overlap	no_peak_overlap
IG_222_genes-complement	chr02	259566	265491	chr02	258952	259662	-	tandemC	222	sgd	gene	gene_id YBR012C; gene_source sgd; gene_biotype protein_coding;	-1	5926	tandem	TRUE	TRUE	YBR012C		no_peak_overlap	no_peak_overlap
IG_2220_genes-complement	chr07	784858	785275	chr07	784026	784922	-	tandemC	2220	sgd	gene	gene_id YGR146C; gene_name ECL1; gene_source sgd; gene_biotype protein_coding;	-1	418	tandem	TRUE	TRUE	YGR146C	ECL1	strong_peak	any_peak_overlap
IG_2221_genes-complement	chr07	785437	786053	chr07	785093	785547	-	tandemC	2221	sgd	gene	gene_id YGR146C-A; gene_source sgd; gene_biotype protein_coding;	-1	617	tandem	TRUE	TRUE	YGR146C-A		strong_peak	any_peak_overlap
IG_2222_genes-complement	chr07	786920	787311	chr07	785964	786977	-	tandemC	2222	sgd	gene	gene_id YGR147C; gene_name NAT2; gene_source sgd; gene_biotype protein_coding;	-1	392	tandem	TRUE	TRUE	YGR147C	NAT2	mild_peak	any_peak_overlap
IG_2223_genes-complement	chr07	787779	789030	chr07	787223	788209	-	divergent	2223	sgd	gene	gene_id YGR148C; gene_name RPL24B; gene_source sgd; gene_biotype protein_coding;	-1	1252	divergent	TRUE	TRUE	YGR148C	RPL24B	mild_peak	any_peak_overlap
IG_2223_genes-complement	chr07	787779	789030	chr07	788976	790488	+	divergent	2223	sgd	gene	gene_id YGR149W; gene_name GPC1; gene_source sgd; gene_biotype protein_coding;	1	1252	divergent	TRUE	TRUE	YGR149W	GPC1	mild_peak	any_peak_overlap
IG_2225_genes-complement	chr07	793053	794654	chr07	790347	793077	-	tandemC	2225	sgd	gene	gene_id YGR150C; gene_name CCM1; gene_source sgd; gene_biotype protein_coding;	-1	1602	tandem	TRUE	TRUE	YGR150C	CCM1	mild_peak	any_peak_overlap
IG_2226_genes-complement	chr07	795492	796091	chr07	796062	796843	+	divergent	2226	sgd	gene	gene_id YGR153W; gene_source sgd; gene_biotype protein_coding;	1	600	divergent	TRUE	TRUE	YGR153W		mild_peak	any_peak_overlap
IG_2226_genes-complement	chr07	795492	796091	chr07	794593	795582	-	divergent	2226	sgd	gene	gene_id YGR152C; gene_name RSR1; gene_source sgd; gene_biotype protein_coding;	-1	600	divergent	TRUE	TRUE	YGR152C	RSR1	mild_peak	any_peak_overlap
IG_2228_genes-complement	chr07	797868	798542	chr07	796646	797923	-	divergent	2228	sgd	gene	gene_id YGR154C; gene_name GTO1; gene_source sgd; gene_biotype protein_coding;	-1	675	divergent	TRUE	TRUE	YGR154C	GTO1	mild_peak	any_peak_overlap
IG_2228_genes-complement	chr07	797868	798542	chr07	798500	800200	+	divergent	2228	sgd	gene	gene_id YGR155W; gene_name CYS4; gene_source sgd; gene_biotype protein_coding;	1	675	divergent	TRUE	TRUE	YGR155W	CYS4	mild_peak	any_peak_overlap
IG_2229_genes-complement	chr07	800066	800545	chr07	800418	801923	+	tandemW	2229	sgd	gene	gene_id YGR156W; gene_name PTI1; gene_source sgd; gene_biotype protein_coding;	1	480	tandem	TRUE	TRUE	YGR156W	PTI1	mild_peak	any_peak_overlap
IG_223_genes-complement	chr02	265881	266724	chr02	265337	265977	-	tandemC	223	sgd	gene	gene_id YBR013C; gene_source sgd; gene_biotype protein_coding;	-1	844	tandem	TRUE	TRUE	YBR013C		no_peak_overlap	no_peak_overlap
IG_2230_genes-complement	chr07	801823	802439	chr07	802313	805161	+	tandemW	2230	sgd	gene	gene_id YGR157W; gene_name CHO2; gene_source sgd; gene_biotype protein_coding;	1	617	tandem	TRUE	TRUE	YGR157W	CHO2	mild_peak	any_peak_overlap
IG_2232_genes-complement	chr07	806021	806411	chr07	805053	806080	-	tandemC	2232	sgd	gene	gene_id YGR158C; gene_name MTR3; gene_source sgd; gene_biotype protein_coding;	-1	391	tandem	TRUE	TRUE	YGR158C	MTR3	no_peak_overlap	no_peak_overlap
IG_2234_genes-complement	chr07	809420	810226	chr07	808535	809492	-	divergent	2234	sgd	gene	gene_id YGR161C; gene_name RTS3; gene_source sgd; gene_biotype protein_coding;	-1	807	divergent	TRUE	TRUE	YGR161C	RTS3	strong_peak	any_peak_overlap
IG_2234_genes-complement	chr07	809420	810226	chr07	810187	810719	+	divergent	2234	sgd	gene	gene_id YGR161W-C; gene_source sgd; gene_biotype protein_coding;	1	807	divergent	TRUE	TRUE	YGR161W-C		strong_peak	any_peak_overlap
IG_2235_genes-complement	chr07	810505	824058	chr07	824015	827060	+	tandemW	2235	sgd	gene	gene_id YGR162W; gene_name TIF4631; gene_source sgd; gene_biotype protein_coding;	1	13554	tandem	TRUE	TRUE	YGR162W	TIF4631	mild_peak	any_peak_overlap
IG_2235_genes-complement	chr07	810505	824058	chr07	824015	827060	+	tandemW	2235	sgd	gene	gene_id YGR162W; gene_name TIF4631; gene_source sgd; gene_biotype protein_coding;	1	13554	tandem	TRUE	TRUE	YGR162W	TIF4631	strong_peak	any_peak_overlap
IG_2236_genes-complement	chr07	826917	827551	chr07	827490	828647	+	tandemW	2236	sgd	gene	gene_id YGR163W; gene_name GTR2; gene_source sgd; gene_biotype protein_coding;	1	635	tandem	TRUE	TRUE	YGR163W	GTR2	no_peak_overlap	no_peak_overlap
IG_2237_genes-complement	chr07	828577	828624	chr07	828625	828960	+	tandemW	2237	sgd	gene	gene_id YGR164W; gene_source sgd; gene_biotype protein_coding;	1	48	tandem	FALSE	TRUE	YGR164W		no_peak_overlap	no_peak_overlap
IG_2238_genes-complement	chr07	828960	829115	chr07	829067	830301	+	tandemW	2238	sgd	gene	gene_id YGR165W; gene_name MRPS35; gene_source sgd; gene_biotype protein_coding;	1	156	tandem	TRUE	TRUE	YGR165W	MRPS35	mild_peak	any_peak_overlap
IG_2239_genes-complement	chr07	830153	830514	chr07	830421	832278	+	tandemW	2239	sgd	gene	gene_id YGR166W; gene_name TRS65; gene_source sgd; gene_biotype protein_coding;	1	362	tandem	TRUE	TRUE	YGR166W	TRS65	no_peak_overlap	no_peak_overlap
IG_224_genes-complement	chr02	267336	267709	chr02	266605	267367	-	tandemC	224	sgd	gene	gene_id YBR014C; gene_name GRX7; gene_source sgd; gene_biotype protein_coding;	-1	374	tandem	TRUE	TRUE	YBR014C	GRX7	no_peak_overlap	no_peak_overlap
IG_2240_genes-complement	chr07	832197	832455	chr07	832393	833336	+	tandemW	2240	sgd	gene	gene_id YGR167W; gene_name CLC1; gene_source sgd; gene_biotype protein_coding;	1	259	tandem	TRUE	TRUE	YGR167W	CLC1	no_peak_overlap	no_peak_overlap
IG_2242_genes-complement	chr07	834482	834688	chr07	833253	834539	-	tandemC	2242	sgd	gene	gene_id YGR168C; gene_source sgd; gene_biotype protein_coding;	-1	207	tandem	TRUE	TRUE	YGR168C		no_peak_overlap	no_peak_overlap
IG_2243_genes-complement	chr07	835903	836386	chr07	834601	835920	-	tandemC	2243	sgd	gene	gene_id YGR169C; gene_name PUS6; gene_source sgd; gene_biotype protein_coding;	-1	484	tandem	TRUE	TRUE	YGR169C	PUS6	no_peak_overlap	no_peak_overlap
IG_2244_genes-complement	chr07	836665	837141	chr07	836213	836739	-	divergent	2244	sgd	gene	gene_id YGR169C-A; gene_source sgd; gene_biotype protein_coding;	-1	477	divergent	TRUE	TRUE	YGR169C-A		strong_peak	any_peak_overlap
IG_2244_genes-complement	chr07	836665	837141	chr07	837092	840663	+	divergent	2244	sgd	gene	gene_id YGR170W; gene_name PSD2; gene_source sgd; gene_biotype protein_coding;	1	477	divergent	TRUE	TRUE	YGR170W	PSD2	strong_peak	any_peak_overlap
IG_2246_genes-complement	chr07	842551	842844	chr07	840710	842580	-	tandemC	2246	sgd	gene	gene_id YGR171C; gene_name MSM1; gene_source sgd; gene_biotype protein_coding;	-1	294	tandem	TRUE	TRUE	YGR171C	MSM1	no_peak_overlap	no_peak_overlap
IG_2247_genes-complement	chr07	843591	843853	chr07	842712	843624	-	divergent	2247	sgd	gene	gene_id YGR172C; gene_name YIP1; gene_source sgd; gene_biotype protein_coding;	-1	263	divergent	TRUE	TRUE	YGR172C	YIP1	no_peak_overlap	no_peak_overlap
IG_2247_genes-complement	chr07	843591	843853	chr07	843806	845132	+	divergent	2247	sgd	gene	gene_id YGR173W; gene_name RBG2; gene_source sgd; gene_biotype protein_coding;	1	263	divergent	TRUE	TRUE	YGR173W	RBG2	no_peak_overlap	no_peak_overlap
IG_2249_genes-complement	chr07	846405	846654	chr07	845770	846492	-	divergent	2249	sgd	gene	gene_id YGR174C; gene_name CBP4; gene_source sgd; gene_biotype protein_coding;	-1	250	divergent	TRUE	TRUE	YGR174C	CBP4	no_peak_overlap	no_peak_overlap
IG_2249_genes-complement	chr07	846405	846654	chr07	846554	846849	+	divergent	2249	sgd	gene	gene_id YGR174W-A; gene_source sgd; gene_biotype protein_coding;	1	250	divergent	TRUE	TRUE	YGR174W-A		no_peak_overlap	no_peak_overlap
IG_225_genes-complement	chr02	269503	270246	chr02	267571	269597	-	divergent	225	sgd	gene	gene_id YBR015C; gene_name MNN2; gene_source sgd; gene_biotype protein_coding;	-1	744	divergent	TRUE	TRUE	YBR015C	MNN2	mild_peak	any_peak_overlap
IG_225_genes-complement	chr02	269503	270246	chr02	270206	270823	+	divergent	225	sgd	gene	gene_id YBR016W; gene_source sgd; gene_biotype protein_coding;	1	744	divergent	TRUE	TRUE	YBR016W		mild_peak	any_peak_overlap
IG_2251_genes-complement	chr07	848423	848719	chr07	846760	848505	-	divergent	2251	sgd	gene	gene_id YGR175C; gene_name ERG1; gene_source sgd; gene_biotype protein_coding;	-1	297	divergent	TRUE	TRUE	YGR175C	ERG1	no_peak_overlap	no_peak_overlap
IG_2251_genes-complement	chr07	848423	848719	chr07	848720	849067	+	divergent	2251	sgd	gene	gene_id YGR176W; gene_source sgd; gene_biotype protein_coding;	1	297	divergent	FALSE	TRUE	YGR176W		no_peak_overlap	no_peak_overlap
IG_2252_genes-complement	chr07	850436	851046	chr07	848623	850499	-	tandemC	2252	sgd	gene	gene_id YGR177C; gene_name ATF2; gene_source sgd; gene_biotype protein_coding;	-1	611	tandem	TRUE	TRUE	YGR177C	ATF2	no_peak_overlap	no_peak_overlap
IG_2253_genes-complement	chr07	853215	853674	chr07	850929	853300	-	tandemC	2253	sgd	gene	gene_id YGR178C; gene_name PBP1; gene_source sgd; gene_biotype protein_coding;	-1	460	tandem	TRUE	TRUE	YGR178C	PBP1	no_peak_overlap	no_peak_overlap
IG_2254_genes-complement	chr07	854895	855263	chr07	853573	854922	-	tandemC	2254	sgd	gene	gene_id YGR179C; gene_name OKP1; gene_source sgd; gene_biotype protein_coding;	-1	369	tandem	TRUE	TRUE	YGR179C	OKP1	mild_peak	any_peak_overlap
IG_2255_genes-complement	chr07	856301	858286	chr07	855145	856332	-	divergent	2255	sgd	gene	gene_id YGR180C; gene_name RNR4; gene_source sgd; gene_biotype protein_coding;	-1	1986	divergent	TRUE	TRUE	YGR180C	RNR4	strong_peak	any_peak_overlap
IG_2255_genes-complement	chr07	856301	858286	chr07	858233	858790	+	divergent	2255	sgd	gene	gene_id YGR181W; gene_name TIM13; gene_source sgd; gene_biotype protein_coding;	1	1986	divergent	TRUE	TRUE	YGR181W	TIM13	strong_peak	any_peak_overlap
IG_2256_genes-complement	chr07	858904	859062	chr07	858551	858904	-	tandemC	2256	sgd	gene	gene_id YGR182C; gene_source sgd; gene_biotype protein_coding;	-1	159	tandem	FALSE	TRUE	YGR182C		no_peak_overlap	no_peak_overlap
IG_2257_genes-complement	chr07	859476	859900	chr07	858917	859548	-	tandemC	2257	sgd	gene	gene_id YGR183C; gene_name QCR9; gene_source sgd; gene_biotype protein_coding;	-1	425	tandem	TRUE	TRUE	YGR183C	QCR9	mild_peak	any_peak_overlap
IG_2258_genes-complement	chr07	865753	866335	chr07	859821	865774	-	tandemC	2258	sgd	gene	gene_id YGR184C; gene_name UBR1; gene_source sgd; gene_biotype protein_coding;	-1	583	tandem	TRUE	TRUE	YGR184C	UBR1	no_peak_overlap	no_peak_overlap
IG_2259_genes-complement	chr07	867520	867773	chr07	867753	870071	+	divergent	2259	sgd	gene	gene_id YGR186W; gene_name TFG1; gene_source sgd; gene_biotype protein_coding;	1	254	divergent	TRUE	TRUE	YGR186W	TFG1	no_peak_overlap	no_peak_overlap
IG_2259_genes-complement	chr07	867520	867773	chr07	866253	867552	-	divergent	2259	sgd	gene	gene_id YGR185C; gene_name TYS1; gene_source sgd; gene_biotype protein_coding;	-1	254	divergent	TRUE	TRUE	YGR185C	TYS1	no_peak_overlap	no_peak_overlap
IG_2261_genes-complement	chr07	871416	872043	chr07	870103	871461	-	tandemC	2261	sgd	gene	gene_id YGR187C; gene_name HGH1; gene_source sgd; gene_biotype protein_coding;	-1	628	tandem	TRUE	TRUE	YGR187C	HGH1	no_peak_overlap	no_peak_overlap
IG_2262_genes-complement	chr07	875109	876668	chr07	871887	875163	-	tandemC	2262	sgd	gene	gene_id YGR188C; gene_name BUB1; gene_source sgd; gene_biotype protein_coding;	-1	1560	tandem	TRUE	TRUE	YGR188C	BUB1	mild_peak	any_peak_overlap
IG_2263_genes-complement	chr07	878192	880295	chr07	876561	878256	-	tandemC	2263	sgd	gene	gene_id YGR189C; gene_name CRH1; gene_source sgd; gene_biotype protein_coding;	-1	2104	tandem	TRUE	TRUE	YGR189C	CRH1	strong_peak	any_peak_overlap
IG_2265_genes-complement	chr07	883810	884508	chr07	882711	883849	-	tandemC	2265	sgd	gene	gene_id YGR192C; gene_name TDH3; gene_source sgd; gene_biotype protein_coding;	-1	699	tandem	TRUE	TRUE	YGR192C	TDH3	mild_peak	any_peak_overlap
IG_2266_genes-complement	chr07	885741	886072	chr07	884405	885829	-	tandemC	2266	sgd	gene	gene_id YGR193C; gene_name PDX1; gene_source sgd; gene_biotype protein_coding;	-1	332	tandem	TRUE	TRUE	YGR193C	PDX1	no_peak_overlap	no_peak_overlap
IG_2267_genes-complement	chr07	887875	888881	chr07	885958	887923	-	divergent	2267	sgd	gene	gene_id YGR194C; gene_name XKS1; gene_source sgd; gene_biotype protein_coding;	-1	1007	divergent	TRUE	TRUE	YGR194C	XKS1	no_peak_overlap	no_peak_overlap
IG_2267_genes-complement	chr07	887875	888881	chr07	888767	889705	+	divergent	2267	sgd	gene	gene_id YGR195W; gene_name SKI6; gene_source sgd; gene_biotype protein_coding;	1	1007	divergent	TRUE	TRUE	YGR195W	SKI6	no_peak_overlap	no_peak_overlap
IG_2269_genes-complement	chr07	892186	892496	chr07	889626	892244	-	tandemC	2269	sgd	gene	gene_id YGR196C; gene_name FYV8; gene_source sgd; gene_biotype protein_coding;	-1	311	tandem	TRUE	TRUE	YGR196C	FYV8	no_peak_overlap	no_peak_overlap
IG_227_genes-complement	chr02	273703	274426	chr02	270788	273761	-	tandemC	227	sgd	gene	gene_id YBR017C; gene_name KAP104; gene_source sgd; gene_biotype protein_coding;	-1	724	tandem	TRUE	TRUE	YBR017C	KAP104	no_peak_overlap	no_peak_overlap
IG_2270_genes-complement	chr07	894140	894692	chr07	892430	894233	-	divergent	2270	sgd	gene	gene_id YGR197C; gene_name SNG1; gene_source sgd; gene_biotype protein_coding;	-1	553	divergent	TRUE	TRUE	YGR197C	SNG1	strong_peak	any_peak_overlap
IG_2270_genes-complement	chr07	894140	894692	chr07	894650	897264	+	divergent	2270	sgd	gene	gene_id YGR198W; gene_name YPP1; gene_source sgd; gene_biotype protein_coding;	1	553	divergent	TRUE	TRUE	YGR198W	YPP1	strong_peak	any_peak_overlap
IG_2271_genes-complement	chr07	897146	897501	chr07	897462	899908	+	tandemW	2271	sgd	gene	gene_id YGR199W; gene_name PMT6; gene_source sgd; gene_biotype protein_coding;	1	356	tandem	TRUE	TRUE	YGR199W	PMT6	no_peak_overlap	no_peak_overlap
IG_2273_genes-complement	chr07	902270	902519	chr07	899841	902319	-	tandemC	2273	sgd	gene	gene_id YGR200C; gene_name ELP2; gene_source sgd; gene_biotype protein_coding;	-1	250	tandem	TRUE	TRUE	YGR200C	ELP2	no_peak_overlap	no_peak_overlap
IG_2274_genes-complement	chr07	903197	903473	chr07	902457	903239	-	tandemC	2274	sgd	gene	gene_id YGR201C; gene_source sgd; gene_biotype protein_coding;	-1	277	tandem	TRUE	TRUE	YGR201C		mild_peak	any_peak_overlap
IG_2275_genes-complement	chr07	904748	905236	chr07	903349	904784	-	divergent	2275	sgd	gene	gene_id YGR202C; gene_name PCT1; gene_source sgd; gene_biotype protein_coding;	-1	489	divergent	TRUE	TRUE	YGR202C	PCT1	mild_peak	any_peak_overlap
IG_2275_genes-complement	chr07	904748	905236	chr07	905196	905874	+	divergent	2275	sgd	gene	gene_id YGR203W; gene_name YCH1; gene_source sgd; gene_biotype protein_coding;	1	489	divergent	TRUE	TRUE	YGR203W	YCH1	mild_peak	any_peak_overlap
IG_2276_genes-complement	chr07	905683	905933	chr07	905888	908866	+	tandemW	2276	sgd	gene	gene_id YGR204W; gene_name ADE3; gene_source sgd; gene_biotype protein_coding;	1	251	tandem	TRUE	TRUE	YGR204W	ADE3	mild_peak	any_peak_overlap
IG_2278_genes-complement	chr07	909174	909212	chr07	909061	909174	-	divergent	2278	sgd	gene	gene_id YGR204C-A; gene_source sgd; gene_biotype protein_coding;	-1	39	divergent	FALSE	TRUE	YGR204C-A		no_peak_overlap	no_peak_overlap
IG_2278_genes-complement	chr07	909174	909212	chr07	909084	910251	+	divergent	2278	sgd	gene	gene_id YGR205W; gene_name TDA10; gene_source sgd; gene_biotype protein_coding;	1	39	divergent	TRUE	TRUE	YGR205W	TDA10	no_peak_overlap	no_peak_overlap
IG_2279_genes-complement	chr07	910085	910431	chr07	910404	910829	+	tandemW	2279	sgd	gene	gene_id YGR206W; gene_name MVB12; gene_source sgd; gene_biotype protein_coding;	1	347	tandem	TRUE	TRUE	YGR206W	MVB12	no_peak_overlap	no_peak_overlap
IG_228_genes-complement	chr02	275527	276252	chr02	274283	275587	-	tandemC	228	sgd	gene	gene_id YBR018C; gene_name GAL7; gene_source sgd; gene_biotype protein_coding;	-1	726	tandem	TRUE	TRUE	YBR018C	GAL7	mild_peak	any_peak_overlap
IG_2281_genes-complement	chr07	911628	911882	chr07	910728	911659	-	divergent	2281	sgd	gene	gene_id YGR207C; gene_name CIR1; gene_source sgd; gene_biotype protein_coding;	-1	255	divergent	TRUE	TRUE	YGR207C	CIR1	no_peak_overlap	no_peak_overlap
IG_2281_genes-complement	chr07	911628	911882	chr07	911836	912903	+	divergent	2281	sgd	gene	gene_id YGR208W; gene_name SER2; gene_source sgd; gene_biotype protein_coding;	1	255	divergent	TRUE	TRUE	YGR208W	SER2	no_peak_overlap	no_peak_overlap
IG_2283_genes-complement	chr07	913227	913502	chr07	912833	913295	-	tandemC	2283	sgd	gene	gene_id YGR209C; gene_name TRX2; gene_source sgd; gene_biotype protein_coding;	-1	276	tandem	TRUE	TRUE	YGR209C	TRX2	strong_peak	any_peak_overlap
IG_2284_genes-complement	chr07	914738	915240	chr07	913404	914801	-	divergent	2284	sgd	gene	gene_id YGR210C; gene_source sgd; gene_biotype protein_coding;	-1	503	divergent	TRUE	TRUE	YGR210C		strong_peak	any_peak_overlap
IG_2284_genes-complement	chr07	914738	915240	chr07	915152	916892	+	divergent	2284	sgd	gene	gene_id YGR211W; gene_name ZPR1; gene_source sgd; gene_biotype protein_coding;	1	503	divergent	TRUE	TRUE	YGR211W	ZPR1	strong_peak	any_peak_overlap
IG_2285_genes-complement	chr07	916701	917039	chr07	917007	918527	+	tandemW	2285	sgd	gene	gene_id YGR212W; gene_name SLI1; gene_source sgd; gene_biotype protein_coding;	1	339	tandem	TRUE	TRUE	YGR212W	SLI1	no_peak_overlap	no_peak_overlap
IG_2287_genes-complement	chr07	919465	920574	chr07	918406	919531	-	divergent	2287	sgd	gene	gene_id YGR213C; gene_name RTA1; gene_source sgd; gene_biotype protein_coding;	-1	1110	divergent	TRUE	TRUE	YGR213C	RTA1	mild_peak	any_peak_overlap
IG_2287_genes-complement	chr07	919465	920574	chr07	920552	921894	+	divergent	2287	sgd	gene	gene_id YGR214W; gene_name RPS0A; gene_source sgd; gene_biotype protein_coding;	1	1110	divergent	TRUE	TRUE	YGR214W	RPS0A	mild_peak	any_peak_overlap
IG_2288_genes-complement	chr07	921788	922174	chr07	922120	922624	+	tandemW	2288	sgd	gene	gene_id YGR215W; gene_name RSM27; gene_source sgd; gene_biotype protein_coding;	1	387	tandem	TRUE	TRUE	YGR215W	RSM27	no_peak_overlap	no_peak_overlap
IG_229_genes-complement	chr02	278352	279020	chr02	276147	278443	-	divergent	229	sgd	gene	gene_id YBR019C; gene_name GAL10; gene_source sgd; gene_biotype protein_coding;	-1	669	divergent	TRUE	TRUE	YBR019C	GAL10	mild_peak	any_peak_overlap
IG_229_genes-complement	chr02	278352	279020	chr02	278973	280730	+	divergent	229	sgd	gene	gene_id YBR020W; gene_name GAL1; gene_source sgd; gene_biotype protein_coding;	1	669	divergent	TRUE	TRUE	YBR020W	GAL1	mild_peak	any_peak_overlap
IG_2290_genes-complement	chr07	924462	924695	chr07	924648	930878	+	divergent	2290	sgd	gene	gene_id YGR217W; gene_name CCH1; gene_source sgd; gene_biotype protein_coding;	1	234	divergent	TRUE	TRUE	YGR217W	CCH1	no_peak_overlap	no_peak_overlap
IG_2290_genes-complement	chr07	924462	924695	chr07	922534	924496	-	divergent	2290	sgd	gene	gene_id YGR216C; gene_name GPI1; gene_source sgd; gene_biotype protein_coding;	-1	234	divergent	TRUE	TRUE	YGR216C	GPI1	no_peak_overlap	no_peak_overlap
IG_2291_genes-complement	chr07	930815	932540	chr07	932481	935991	+	tandemW	2291	sgd	gene	gene_id YGR218W; gene_name CRM1; gene_source sgd; gene_biotype protein_coding;	1	1726	tandem	TRUE	TRUE	YGR218W	CRM1	mild_peak	any_peak_overlap
IG_2292_genes-complement	chr07	935795	936034	chr07	936035	936376	+	tandemW	2292	sgd	gene	gene_id YGR219W; gene_source sgd; gene_biotype protein_coding;	1	240	tandem	FALSE	TRUE	YGR219W		no_peak_overlap	no_peak_overlap
IG_2293_genes-complement	chr07	936883	937123	chr07	935985	936899	-	tandemC	2293	sgd	gene	gene_id YGR220C; gene_name MRPL9; gene_source sgd; gene_biotype protein_coding;	-1	241	tandem	TRUE	TRUE	YGR220C	MRPL9	no_peak_overlap	no_peak_overlap
IG_2294_genes-complement	chr07	938992	939922	chr07	937069	939083	-	divergent	2294	sgd	gene	gene_id YGR221C; gene_name TOS2; gene_source sgd; gene_biotype protein_coding;	-1	931	divergent	TRUE	TRUE	YGR221C	TOS2	no_peak_overlap	no_peak_overlap
IG_2294_genes-complement	chr07	938992	939922	chr07	939913	940895	+	divergent	2294	sgd	gene	gene_id YGR222W; gene_name PET54; gene_source sgd; gene_biotype protein_coding;	1	931	divergent	TRUE	TRUE	YGR222W	PET54	no_peak_overlap	no_peak_overlap
IG_2296_genes-complement	chr07	942215	942805	chr07	940791	942267	-	divergent	2296	sgd	gene	gene_id YGR223C; gene_name HSV2; gene_source sgd; gene_biotype protein_coding;	-1	591	divergent	TRUE	TRUE	YGR223C	HSV2	mild_peak	any_peak_overlap
IG_2296_genes-complement	chr07	942215	942805	chr07	942725	944861	+	divergent	2296	sgd	gene	gene_id YGR224W; gene_name AZR1; gene_source sgd; gene_biotype protein_coding;	1	591	divergent	TRUE	TRUE	YGR224W	AZR1	mild_peak	any_peak_overlap
IG_2297_genes-complement	chr07	944647	945144	chr07	945054	947144	+	tandemW	2297	sgd	gene	gene_id YGR225W; gene_name AMA1; gene_source sgd; gene_biotype protein_coding;	1	498	tandem	TRUE	TRUE	YGR225W	AMA1	no_peak_overlap	no_peak_overlap
IG_2298_genes-complement	chr07	947019	947419	chr07	947346	949128	+	tandemW	2298	sgd	gene	gene_id YGR227W; gene_name DIE2; gene_source sgd; gene_biotype protein_coding;	1	401	tandem	TRUE	TRUE	YGR227W	DIE2	no_peak_overlap	no_peak_overlap
IG_2299_genes-complement	chr07	948997	949364	chr07	949365	949709	+	tandemW	2299	sgd	gene	gene_id YGR228W; gene_source sgd; gene_biotype protein_coding;	1	368	tandem	FALSE	TRUE	YGR228W		no_peak_overlap	no_peak_overlap
IG_23_genes-complement	chr01	52595	52800	chr01	51734	52644	-	tandemC	23	sgd	gene	gene_id YAL049C; gene_name AIM2; gene_source sgd; gene_biotype protein_coding;	-1	206	tandem	TRUE	TRUE	YAL049C	AIM2	no_peak_overlap	no_peak_overlap
IG_230_genes-complement	chr02	280607	281442	chr02	281333	283484	+	tandemW	230	sgd	gene	gene_id YBR021W; gene_name FUR4; gene_source sgd; gene_biotype protein_coding;	1	836	tandem	TRUE	TRUE	YBR021W	FUR4	mild_peak	any_peak_overlap
IG_2300_genes-complement	chr07	950899	951893	chr07	951779	952461	+	divergent	2300	sgd	gene	gene_id YGR230W; gene_name BNS1; gene_source sgd; gene_biotype protein_coding;	1	995	divergent	TRUE	TRUE	YGR230W	BNS1	strong_peak	any_peak_overlap
IG_2300_genes-complement	chr07	950899	951893	chr07	949210	950965	-	divergent	2300	sgd	gene	gene_id YGR229C; gene_name SMI1; gene_source sgd; gene_biotype protein_coding;	-1	995	divergent	TRUE	TRUE	YGR229C	SMI1	strong_peak	any_peak_overlap
IG_2302_genes-complement	chr07	953480	953959	chr07	952332	953540	-	divergent	2302	sgd	gene	gene_id YGR231C; gene_name PHB2; gene_source sgd; gene_biotype protein_coding;	-1	480	divergent	TRUE	TRUE	YGR231C	PHB2	no_peak_overlap	no_peak_overlap
IG_2302_genes-complement	chr07	953480	953959	chr07	953928	954704	+	divergent	2302	sgd	gene	gene_id YGR232W; gene_name NAS6; gene_source sgd; gene_biotype protein_coding;	1	480	divergent	TRUE	TRUE	YGR232W	NAS6	no_peak_overlap	no_peak_overlap
IG_2304_genes-complement	chr07	958210	959903	chr07	959881	961309	+	divergent	2304	sgd	gene	gene_id YGR234W; gene_name YHB1; gene_source sgd; gene_biotype protein_coding;	1	1694	divergent	TRUE	TRUE	YGR234W	YHB1	no_peak_overlap	no_peak_overlap
IG_2304_genes-complement	chr07	958210	959903	chr07	954615	958302	-	divergent	2304	sgd	gene	gene_id YGR233C; gene_name PHO81; gene_source sgd; gene_biotype protein_coding;	-1	1694	divergent	TRUE	TRUE	YGR233C	PHO81	no_peak_overlap	no_peak_overlap
IG_2306_genes-complement	chr07	962061	962529	chr07	961225	962104	-	tandemC	2306	sgd	gene	gene_id YGR235C; gene_source sgd; gene_biotype protein_coding;	-1	469	tandem	TRUE	TRUE	YGR235C		strong_peak	any_peak_overlap
IG_2307_genes-complement	chr07	962817	963297	chr07	962343	962871	-	tandemC	2307	sgd	gene	gene_id YGR236C; gene_name SPG1; gene_source sgd; gene_biotype protein_coding;	-1	481	tandem	TRUE	TRUE	YGR236C	SPG1	strong_peak	any_peak_overlap
IG_2308_genes-complement	chr07	965655	966038	chr07	963147	965719	-	tandemC	2308	sgd	gene	gene_id YGR237C; gene_source sgd; gene_biotype protein_coding;	-1	384	tandem	TRUE	TRUE	YGR237C		no_peak_overlap	no_peak_overlap
IG_2309_genes-complement	chr07	968687	969186	chr07	965946	968730	-	tandemC	2309	sgd	gene	gene_id YGR238C; gene_name KEL2; gene_source sgd; gene_biotype protein_coding;	-1	500	tandem	TRUE	TRUE	YGR238C	KEL2	no_peak_overlap	no_peak_overlap
IG_231_genes-complement	chr02	283344	283737	chr02	283685	284417	+	tandemW	231	sgd	gene	gene_id YBR022W; gene_name POA1; gene_source sgd; gene_biotype protein_coding;	1	394	tandem	TRUE	TRUE	YBR022W	POA1	no_peak_overlap	no_peak_overlap
IG_2310_genes-complement	chr07	970053	970770	chr07	969099	970091	-	tandemC	2310	sgd	gene	gene_id YGR239C; gene_name PEX21; gene_source sgd; gene_biotype protein_coding;	-1	718	tandem	TRUE	TRUE	YGR239C	PEX21	no_peak_overlap	no_peak_overlap
IG_2311_genes-complement	chr07	973734	974576	chr07	970557	973813	-	tandemC	2311	sgd	gene	gene_id YGR240C; gene_name PFK1; gene_source sgd; gene_biotype protein_coding;	-1	843	tandem	TRUE	TRUE	YGR240C	PFK1	mild_peak	any_peak_overlap
IG_2312_genes-complement	chr07	974777	974874	chr07	974577	974777	-	tandemC	2312	sgd	gene	gene_id YGR240C-A; gene_source sgd; gene_biotype protein_coding;	-1	98	tandem	FALSE	TRUE	YGR240C-A		mild_peak	any_peak_overlap
IG_2313_genes-complement	chr07	976723	977335	chr07	977251	977913	+	tandemW	2313	sgd	gene	gene_id YGR243W; gene_name MPC3; gene_source sgd; gene_biotype protein_coding;	1	613	tandem	TRUE	TRUE	YGR243W	MPC3	strong_peak	any_peak_overlap
IG_2315_genes-complement	chr07	979319	979764	chr07	977950	979425	-	tandemC	2315	sgd	gene	gene_id YGR244C; gene_name LSC2; gene_source sgd; gene_biotype protein_coding;	-1	446	tandem	TRUE	TRUE	YGR244C	LSC2	mild_peak	any_peak_overlap
IG_2316_genes-complement	chr07	982068	982481	chr07	979667	982168	-	tandemC	2316	sgd	gene	gene_id YGR245C; gene_name SDA1; gene_source sgd; gene_biotype protein_coding;	-1	414	tandem	TRUE	TRUE	YGR245C	SDA1	no_peak_overlap	no_peak_overlap
IG_2317_genes-complement	chr07	984272	984965	chr07	982324	984296	-	divergent	2317	sgd	gene	gene_id YGR246C; gene_name BRF1; gene_source sgd; gene_biotype protein_coding;	-1	694	divergent	TRUE	TRUE	YGR246C	BRF1	no_peak_overlap	no_peak_overlap
IG_2317_genes-complement	chr07	984272	984965	chr07	984859	985834	+	divergent	2317	sgd	gene	gene_id YGR247W; gene_name CPD1; gene_source sgd; gene_biotype protein_coding;	1	694	divergent	TRUE	TRUE	YGR247W	CPD1	no_peak_overlap	no_peak_overlap
IG_2318_genes-complement	chr07	985685	985971	chr07	985941	986846	+	tandemW	2318	sgd	gene	gene_id YGR248W; gene_name SOL4; gene_source sgd; gene_biotype protein_coding;	1	287	tandem	TRUE	TRUE	YGR248W	SOL4	no_peak_overlap	no_peak_overlap
IG_2319_genes-complement	chr07	986739	988048	chr07	988049	989419	+	tandemW	2319	sgd	gene	gene_id YGR249W; gene_name MGA1; gene_source sgd; gene_biotype protein_coding;	1	1310	tandem	FALSE	TRUE	YGR249W	MGA1	strong_peak	any_peak_overlap
IG_2321_genes-complement	chr07	993521	995638	chr07	991070	993645	-	divergent	2321	sgd	gene	gene_id YGR250C; gene_name RIE1; gene_source sgd; gene_biotype protein_coding;	-1	2118	divergent	TRUE	TRUE	YGR250C	RIE1	strong_peak	any_peak_overlap
IG_2321_genes-complement	chr07	993521	995638	chr07	995603	996363	+	divergent	2321	sgd	gene	gene_id YGR251W; gene_name NOP19; gene_source sgd; gene_biotype protein_coding;	1	2118	divergent	TRUE	TRUE	YGR251W	NOP19	strong_peak	any_peak_overlap
IG_2322_genes-complement	chr07	996229	996868	chr07	996824	998393	+	tandemW	2322	sgd	gene	gene_id YGR252W; gene_name GCN5; gene_source sgd; gene_biotype protein_coding;	1	640	tandem	TRUE	TRUE	YGR252W	GCN5	no_peak_overlap	no_peak_overlap
IG_2324_genes-complement	chr07	999140	1000926	chr07	998291	999189	-	divergent	2324	sgd	gene	gene_id YGR253C; gene_name PUP2; gene_source sgd; gene_biotype protein_coding;	-1	1787	divergent	TRUE	TRUE	YGR253C	PUP2	strong_peak	any_peak_overlap
IG_2324_genes-complement	chr07	999140	1000926	chr07	1000888	1002389	+	divergent	2324	sgd	gene	gene_id YGR254W; gene_name ENO1; gene_source sgd; gene_biotype protein_coding;	1	1787	divergent	TRUE	TRUE	YGR254W	ENO1	strong_peak	any_peak_overlap
IG_2326_genes-complement	chr07	1003962	1004623	chr07	1004555	1006227	+	divergent	2326	sgd	gene	gene_id YGR256W; gene_name GND2; gene_source sgd; gene_biotype protein_coding;	1	662	divergent	TRUE	TRUE	YGR256W	GND2	mild_peak	any_peak_overlap
IG_2326_genes-complement	chr07	1003962	1004623	chr07	1002402	1004048	-	divergent	2326	sgd	gene	gene_id YGR255C; gene_name COQ6; gene_source sgd; gene_biotype protein_coding;	-1	662	divergent	TRUE	TRUE	YGR255C	COQ6	mild_peak	any_peak_overlap
IG_2328_genes-complement	chr07	1007305	1007670	chr07	1006145	1007397	-	tandemC	2328	sgd	gene	gene_id YGR257C; gene_name MTM1; gene_source sgd; gene_biotype protein_coding;	-1	366	tandem	TRUE	TRUE	YGR257C	MTM1	no_peak_overlap	no_peak_overlap
IG_2329_genes-complement	chr07	1010766	1012480	chr07	1007619	1010864	-	tandemC	2329	sgd	gene	gene_id YGR258C; gene_name RAD2; gene_source sgd; gene_biotype protein_coding;	-1	1715	tandem	TRUE	TRUE	YGR258C	RAD2	mild_peak	any_peak_overlap
IG_233_genes-complement	chr02	287925	289444	chr02	284295	288038	-	divergent	233	sgd	gene	gene_id YBR023C; gene_name CHS3; gene_source sgd; gene_biotype protein_coding;	-1	1520	divergent	TRUE	TRUE	YBR023C	CHS3	no_peak_overlap	no_peak_overlap
IG_233_genes-complement	chr02	287925	289444	chr02	289341	290504	+	divergent	233	sgd	gene	gene_id YBR024W; gene_name SCO2; gene_source sgd; gene_biotype protein_coding;	1	1520	divergent	TRUE	TRUE	YBR024W	SCO2	no_peak_overlap	no_peak_overlap
IG_2331_genes-complement	chr07	1016750	1016973	chr07	1014227	1016789	-	tandemC	2331	sgd	gene	gene_id YGR261C; gene_name APL6; gene_source sgd; gene_biotype protein_coding;	-1	224	tandem	TRUE	TRUE	YGR261C	APL6	no_peak_overlap	no_peak_overlap
IG_2332_genes-complement	chr07	1017759	1017966	chr07	1016872	1017788	-	tandemC	2332	sgd	gene	gene_id YGR262C; gene_name BUD32; gene_source sgd; gene_biotype protein_coding;	-1	208	tandem	TRUE	TRUE	YGR262C	BUD32	no_peak_overlap	no_peak_overlap
IG_2333_genes-complement	chr07	1019241	1019597	chr07	1017895	1019273	-	tandemC	2333	sgd	gene	gene_id YGR263C; gene_name SAY1; gene_source sgd; gene_biotype protein_coding;	-1	357	tandem	TRUE	TRUE	YGR263C	SAY1	no_peak_overlap	no_peak_overlap
IG_2334_genes-complement	chr07	1022058	1022655	chr07	1022606	1024964	+	tandemW	2334	sgd	gene	gene_id YGR266W; gene_source sgd; gene_biotype protein_coding;	1	598	tandem	TRUE	TRUE	YGR266W		mild_peak	any_peak_overlap
IG_2336_genes-complement	chr07	1025735	1026056	chr07	1024904	1025846	-	tandemC	2336	sgd	gene	gene_id YGR267C; gene_name FOL2; gene_source sgd; gene_biotype protein_coding;	-1	322	tandem	TRUE	TRUE	YGR267C	FOL2	strong_peak	any_peak_overlap
IG_2337_genes-complement	chr07	1026962	1027369	chr07	1027264	1031605	+	tandemW	2337	sgd	gene	gene_id YGR270W; gene_name YTA7; gene_source sgd; gene_biotype protein_coding;	1	408	tandem	TRUE	TRUE	YGR270W	YTA7	strong_peak	any_peak_overlap
IG_2338_genes-complement	chr07	1031509	1031790	chr07	1031767	1037826	+	tandemW	2338	sgd	gene	gene_id YGR271W; gene_name SLH1; gene_source sgd; gene_biotype protein_coding;	1	282	tandem	TRUE	TRUE	YGR271W	SLH1	no_peak_overlap	no_peak_overlap
IG_2340_genes-complement	chr07	1038501	1038714	chr07	1037712	1038536	-	tandemC	2340	sgd	gene	gene_id YGR271C-A; gene_name EFG1; gene_source sgd; gene_biotype protein_coding;	-1	214	tandem	TRUE	TRUE	YGR271C-A	EFG1	no_peak_overlap	no_peak_overlap
IG_2341_genes-complement	chr07	1039239	1039894	chr07	1038508	1039309	-	tandemC	2341	sgd	gene	gene_id YGR273C; gene_source sgd; gene_biotype protein_coding;	-1	656	tandem	TRUE	TRUE	YGR273C		no_peak_overlap	no_peak_overlap
IG_2342_genes-complement	chr07	1043095	1043275	chr07	1043251	1043864	+	divergent	2342	sgd	gene	gene_id YGR275W; gene_name RTT102; gene_source sgd; gene_biotype protein_coding;	1	181	divergent	TRUE	TRUE	YGR275W	RTT102	mild_peak	any_peak_overlap
IG_2342_genes-complement	chr07	1043095	1043275	chr07	1039814	1043113	-	divergent	2342	sgd	gene	gene_id YGR274C; gene_name TAF1; gene_source sgd; gene_biotype protein_coding;	-1	181	divergent	TRUE	TRUE	YGR274C	TAF1	mild_peak	any_peak_overlap
IG_2344_genes-complement	chr07	1045480	1045643	chr07	1043748	1045502	-	tandemC	2344	sgd	gene	gene_id YGR276C; gene_name RNH70; gene_source sgd; gene_biotype protein_coding;	-1	164	tandem	TRUE	TRUE	YGR276C	RNH70	no_peak_overlap	no_peak_overlap
IG_2345_genes-complement	chr07	1046561	1046730	chr07	1046711	1048578	+	divergent	2345	sgd	gene	gene_id YGR278W; gene_name CWC22; gene_source sgd; gene_biotype protein_coding;	1	170	divergent	TRUE	TRUE	YGR278W	CWC22	no_peak_overlap	no_peak_overlap
IG_2345_genes-complement	chr07	1046561	1046730	chr07	1045580	1046578	-	divergent	2345	sgd	gene	gene_id YGR277C; gene_name CAB4; gene_source sgd; gene_biotype protein_coding;	-1	170	divergent	TRUE	TRUE	YGR277C	CAB4	no_peak_overlap	no_peak_overlap
IG_2347_genes-complement	chr07	1049958	1050909	chr07	1048605	1050057	-	tandemC	2347	sgd	gene	gene_id YGR279C; gene_name SCW4; gene_source sgd; gene_biotype protein_coding;	-1	952	tandem	TRUE	TRUE	YGR279C	SCW4	strong_peak	any_peak_overlap
IG_2348_genes-complement	chr07	1051725	1052823	chr07	1052760	1057431	+	divergent	2348	sgd	gene	gene_id YGR281W; gene_name YOR1; gene_source sgd; gene_biotype protein_coding;	1	1099	divergent	TRUE	TRUE	YGR281W	YOR1	strong_peak	any_peak_overlap
IG_2348_genes-complement	chr07	1051725	1052823	chr07	1050707	1051753	-	divergent	2348	sgd	gene	gene_id YGR280C; gene_name PXR1; gene_source sgd; gene_biotype protein_coding;	-1	1099	divergent	TRUE	TRUE	YGR280C	PXR1	strong_peak	any_peak_overlap
IG_235_genes-complement	chr02	291865	292876	chr02	290488	291916	-	tandemC	235	sgd	gene	gene_id YBR025C; gene_name OLA1; gene_source sgd; gene_biotype protein_coding;	-1	1012	tandem	TRUE	TRUE	YBR025C	OLA1	no_peak_overlap	no_peak_overlap
IG_2350_genes-complement	chr07	1058724	1059014	chr07	1057584	1058755	-	tandemC	2350	sgd	gene	gene_id YGR282C; gene_name BGL2; gene_source sgd; gene_biotype protein_coding;	-1	291	tandem	TRUE	TRUE	YGR282C	BGL2	mild_peak	any_peak_overlap
IG_2351_genes-complement	chr07	1060040	1060657	chr07	1058928	1060072	-	tandemC	2351	sgd	gene	gene_id YGR283C; gene_source sgd; gene_biotype protein_coding;	-1	618	tandem	TRUE	TRUE	YGR283C		no_peak_overlap	no_peak_overlap
IG_2352_genes-complement	chr07	1061590	1061851	chr07	1060479	1061643	-	tandemC	2352	sgd	gene	gene_id YGR284C; gene_name ERV29; gene_source sgd; gene_biotype protein_coding;	-1	262	tandem	TRUE	TRUE	YGR284C	ERV29	no_peak_overlap	no_peak_overlap
IG_2353_genes-complement	chr07	1063153	1063812	chr07	1061781	1063169	-	tandemC	2353	sgd	gene	gene_id YGR285C; gene_name ZUO1; gene_source sgd; gene_biotype protein_coding;	-1	660	tandem	TRUE	TRUE	YGR285C	ZUO1	no_peak_overlap	no_peak_overlap
IG_2354_genes-complement	chr07	1064940	1067221	chr07	1063677	1064998	-	tandemC	2354	sgd	gene	gene_id YGR286C; gene_name BIO2; gene_source sgd; gene_biotype protein_coding;	-1	2282	tandem	TRUE	TRUE	YGR286C	BIO2	mild_peak	any_peak_overlap
IG_2355_genes-complement	chr07	1068991	1070292	chr07	1070235	1071950	+	divergent	2355	sgd	gene	gene_id YGR288W; gene_name MAL13; gene_source sgd; gene_biotype protein_coding;	1	1302	divergent	TRUE	TRUE	YGR288W	MAL13	mild_peak	any_peak_overlap
IG_2355_genes-complement	chr07	1068991	1070292	chr07	1067075	1069061	-	divergent	2355	sgd	gene	gene_id YGR287C; gene_name IMA1; gene_source sgd; gene_biotype protein_coding;	-1	1302	divergent	TRUE	TRUE	YGR287C	IMA1	mild_peak	any_peak_overlap
IG_2358_genes-complement	chr07	1076504	1076598	chr07	1076283	1076504	-	divergent	2358	sgd	gene	gene_id YGR291C; gene_source sgd; gene_biotype protein_coding;	-1	95	divergent	FALSE	TRUE	YGR291C		no_peak_overlap	no_peak_overlap
IG_2358_genes-complement	chr07	1076504	1076598	chr07	1076533	1078502	+	divergent	2358	sgd	gene	gene_id YGR292W; gene_name MAL12; gene_source sgd; gene_biotype protein_coding;	1	95	divergent	TRUE	TRUE	YGR292W	MAL12	no_peak_overlap	no_peak_overlap
IG_236_genes-complement	chr02	294019	294023	chr02	292756	294062	-	tandemC	236	sgd	gene	gene_id YBR026C; gene_name ETR1; gene_source sgd; gene_biotype protein_coding;	-1	5	tandem	TRUE	TRUE	YBR026C	ETR1	no_peak_overlap	no_peak_overlap
IG_2361_genes-complement	chr07	1082729	1084863	chr07	1081407	1082738	-	divergent	2361	sgd	gene	gene_id YGR295C; gene_name COS6; gene_source sgd; gene_biotype protein_coding;	-1	2135	divergent	TRUE	TRUE	YGR295C	COS6	strong_peak	any_peak_overlap
IG_2361_genes-complement	chr07	1082729	1084863	chr07	1084864	1090591	+	divergent	2361	sgd	gene	gene_id YGR296W; gene_name YRF1-3; gene_source sgd; gene_biotype protein_coding;	1	2135	divergent	FALSE	TRUE	YGR296W	YRF1-3	strong_peak	any_peak_overlap
IG_2364_genes-complement	chr08	3311	3725	chr08	335	3364	-	tandemC	2364	sgd	gene	gene_id YHL050C; gene_source sgd; gene_biotype protein_coding;	-1	415	tandem	TRUE	TRUE	YHL050C		no_peak_overlap	no_peak_overlap
IG_2365_genes-complement	chr08	4541	5662	chr08	3726	4541	-	tandemC	2365	sgd	gene	gene_id YHL049C; gene_source sgd; gene_biotype protein_coding;	-1	1122	tandem	FALSE	TRUE	YHL049C		no_peak_overlap	no_peak_overlap
IG_2366_genes-complement	chr08	5797	6400	chr08	6390	7665	+	divergent	2366	sgd	gene	gene_id YHL048W; gene_name COS8; gene_source sgd; gene_biotype protein_coding;	1	604	divergent	TRUE	TRUE	YHL048W	COS8	no_peak_overlap	no_peak_overlap
IG_2366_genes-complement	chr08	5797	6400	chr08	5663	5797	-	divergent	2366	sgd	gene	gene_id YHL048C-A; gene_source sgd; gene_biotype protein_coding;	-1	604	divergent	FALSE	TRUE	YHL048C-A		no_peak_overlap	no_peak_overlap
IG_2369_genes-complement	chr08	12285	12501	chr08	11789	12363	-	divergent	2369	sgd	gene	gene_id YHL046C; gene_name PAU13; gene_source sgd; gene_biotype protein_coding;	-1	217	divergent	TRUE	TRUE	YHL046C	PAU13	no_peak_overlap	no_peak_overlap
IG_2369_genes-complement	chr08	12285	12501	chr08	12366	12950	+	divergent	2369	sgd	gene	gene_id YHL045W; gene_source sgd; gene_biotype protein_coding;	1	217	divergent	TRUE	TRUE	YHL045W		no_peak_overlap	no_peak_overlap
IG_237_genes-complement	chr02	294356	294424	chr02	294024	294356	-	tandemC	237	sgd	gene	gene_id YBR027C; gene_source sgd; gene_biotype protein_coding;	-1	69	tandem	FALSE	TRUE	YBR027C		no_peak_overlap	no_peak_overlap
IG_2370_genes-complement	chr08	12849	13564	chr08	13540	14466	+	tandemW	2370	sgd	gene	gene_id YHL044W; gene_source sgd; gene_biotype protein_coding;	1	716	tandem	TRUE	TRUE	YHL044W		no_peak_overlap	no_peak_overlap
IG_2371_genes-complement	chr08	14272	14900	chr08	14901	15413	+	tandemW	2371	sgd	gene	gene_id YHL043W; gene_name ECM34; gene_source sgd; gene_biotype protein_coding;	1	629	tandem	FALSE	TRUE	YHL043W	ECM34	no_peak_overlap	no_peak_overlap
IG_2372_genes-complement	chr08	15413	15666	chr08	15601	16223	+	tandemW	2372	sgd	gene	gene_id YHL042W; gene_source sgd; gene_biotype protein_coding;	1	254	tandem	TRUE	TRUE	YHL042W		no_peak_overlap	no_peak_overlap
IG_2373_genes-complement	chr08	16119	17391	chr08	17392	17841	+	tandemW	2373	sgd	gene	gene_id YHL041W; gene_source sgd; gene_biotype protein_coding;	1	1273	tandem	FALSE	TRUE	YHL041W		mild_peak	any_peak_overlap
IG_2375_genes-complement	chr08	20971	21782	chr08	18859	21024	-	divergent	2375	sgd	gene	gene_id YHL040C; gene_name ARN1; gene_source sgd; gene_biotype protein_coding;	-1	812	divergent	TRUE	TRUE	YHL040C	ARN1	no_peak_overlap	no_peak_overlap
IG_2375_genes-complement	chr08	20971	21782	chr08	21726	23609	+	divergent	2375	sgd	gene	gene_id YHL039W; gene_name EFM1; gene_source sgd; gene_biotype protein_coding;	1	812	divergent	TRUE	TRUE	YHL039W	EFM1	no_peak_overlap	no_peak_overlap
IG_2377_genes-complement	chr08	25509	25777	chr08	23492	25544	-	tandemC	2377	sgd	gene	gene_id YHL038C; gene_name CBP2; gene_source sgd; gene_biotype protein_coding;	-1	269	tandem	TRUE	TRUE	YHL038C	CBP2	no_peak_overlap	no_peak_overlap
IG_2378_genes-complement	chr08	26179	26240	chr08	25752	26247	-	divergent	2378	sgd	gene	gene_id YHL037C; gene_source sgd; gene_biotype protein_coding;	-1	62	divergent	TRUE	TRUE	YHL037C		no_peak_overlap	no_peak_overlap
IG_2378_genes-complement	chr08	26179	26240	chr08	26204	27960	+	divergent	2378	sgd	gene	gene_id YHL036W; gene_name MUP3; gene_source sgd; gene_biotype protein_coding;	1	62	divergent	TRUE	TRUE	YHL036W	MUP3	no_peak_overlap	no_peak_overlap
IG_238_genes-complement	chr02	296002	296368	chr02	294248	296099	-	tandemC	238	sgd	gene	gene_id YBR028C; gene_name YPK3; gene_source sgd; gene_biotype protein_coding;	-1	367	tandem	TRUE	TRUE	YBR028C	YPK3	no_peak_overlap	no_peak_overlap
IG_2380_genes-complement	chr08	32756	33175	chr08	33176	33637	+	divergent	2380	sgd	gene	gene_id YHL034W-A; gene_source sgd; gene_biotype protein_coding;	1	420	divergent	FALSE	TRUE	YHL034W-A		no_peak_overlap	no_peak_overlap
IG_2380_genes-complement	chr08	32756	33175	chr08	27795	32796	-	divergent	2380	sgd	gene	gene_id YHL035C; gene_name VMR1; gene_source sgd; gene_biotype protein_coding;	-1	420	divergent	TRUE	TRUE	YHL035C	VMR1	no_peak_overlap	no_peak_overlap
IG_2381_genes-complement	chr08	34077	35254	chr08	33038	34187	-	tandemC	2381	sgd	gene	gene_id YHL034C; gene_name SBP1; gene_source sgd; gene_biotype protein_coding;	-1	1178	tandem	TRUE	TRUE	YHL034C	SBP1	no_peak_overlap	no_peak_overlap
IG_2382_genes-complement	chr08	36025	36378	chr08	35173	36047	-	tandemC	2382	sgd	gene	gene_id YHL033C; gene_name RPL8A; gene_source sgd; gene_biotype protein_coding;	-1	354	tandem	TRUE	TRUE	YHL033C	RPL8A	mild_peak	any_peak_overlap
IG_2383_genes-complement	chr08	38508	38814	chr08	36315	38571	-	tandemC	2383	sgd	gene	gene_id YHL032C; gene_name GUT1; gene_source sgd; gene_biotype protein_coding;	-1	307	tandem	TRUE	TRUE	YHL032C	GUT1	strong_peak	any_peak_overlap
IG_2384_genes-complement	chr08	39535	40083	chr08	40064	45795	+	tandemW	2384	sgd	gene	gene_id YHL030W; gene_name ECM29; gene_source sgd; gene_biotype protein_coding;	1	549	tandem	TRUE	TRUE	YHL030W	ECM29	no_peak_overlap	no_peak_overlap
IG_2386_genes-complement	chr08	47968	48762	chr08	45832	47994	-	divergent	2386	sgd	gene	gene_id YHL029C; gene_name OCA5; gene_source sgd; gene_biotype protein_coding;	-1	795	divergent	TRUE	TRUE	YHL029C	OCA5	mild_peak	any_peak_overlap
IG_2386_genes-complement	chr08	47968	48762	chr08	48678	50654	+	divergent	2386	sgd	gene	gene_id YHL028W; gene_name WSC4; gene_source sgd; gene_biotype protein_coding;	1	795	divergent	TRUE	TRUE	YHL028W	WSC4	mild_peak	any_peak_overlap
IG_2387_genes-complement	chr08	50580	51110	chr08	51013	53179	+	tandemW	2387	sgd	gene	gene_id YHL027W; gene_name RIM101; gene_source sgd; gene_biotype protein_coding;	1	531	tandem	TRUE	TRUE	YHL027W	RIM101	mild_peak	any_peak_overlap
IG_2389_genes-complement	chr08	54166	54850	chr08	54800	55948	+	divergent	2389	sgd	gene	gene_id YHL025W; gene_name SNF6; gene_source sgd; gene_biotype protein_coding;	1	685	divergent	TRUE	TRUE	YHL025W	SNF6	mild_peak	any_peak_overlap
IG_2389_genes-complement	chr08	54166	54850	chr08	53102	54225	-	divergent	2389	sgd	gene	gene_id YHL026C; gene_source sgd; gene_biotype protein_coding;	-1	685	divergent	TRUE	TRUE	YHL026C		mild_peak	any_peak_overlap
IG_239_genes-complement	chr02	297742	298291	chr02	296246	297789	-	divergent	239	sgd	gene	gene_id YBR029C; gene_name CDS1; gene_source sgd; gene_biotype protein_coding;	-1	550	divergent	TRUE	TRUE	YBR029C	CDS1	no_peak_overlap	no_peak_overlap
IG_239_genes-complement	chr02	297742	298291	chr02	298226	299995	+	divergent	239	sgd	gene	gene_id YBR030W; gene_name RKM3; gene_source sgd; gene_biotype protein_coding;	1	550	divergent	TRUE	TRUE	YBR030W	RKM3	no_peak_overlap	no_peak_overlap
IG_2390_genes-complement	chr08	55849	56648	chr08	56569	58881	+	tandemW	2390	sgd	gene	gene_id YHL024W; gene_name RIM4; gene_source sgd; gene_biotype protein_coding;	1	800	tandem	TRUE	TRUE	YHL024W	RIM4	strong_peak	any_peak_overlap
IG_2392_genes-complement	chr08	62563	62960	chr08	59036	62610	-	tandemC	2392	sgd	gene	gene_id YHL023C; gene_name NPR3; gene_source sgd; gene_biotype protein_coding;	-1	398	tandem	TRUE	TRUE	YHL023C	NPR3	mild_peak	any_peak_overlap
IG_2393_genes-complement	chr08	64157	64461	chr08	62859	64253	-	tandemC	2393	sgd	gene	gene_id YHL022C; gene_name SPO11; gene_source sgd; gene_biotype protein_coding;	-1	305	tandem	TRUE	TRUE	YHL022C	SPO11	no_peak_overlap	no_peak_overlap
IG_2394_genes-complement	chr08	65859	66241	chr08	64361	65915	-	tandemC	2394	sgd	gene	gene_id YHL021C; gene_name AIM17; gene_source sgd; gene_biotype protein_coding;	-1	383	tandem	TRUE	TRUE	YHL021C	AIM17	no_peak_overlap	no_peak_overlap
IG_2395_genes-complement	chr08	67456	67710	chr08	67711	68304	+	divergent	2395	sgd	gene	gene_id YHL019W-A; gene_source sgd; gene_biotype protein_coding;	1	255	divergent	FALSE	TRUE	YHL019W-A		mild_peak	any_peak_overlap
IG_2395_genes-complement	chr08	67456	67710	chr08	66128	67533	-	divergent	2395	sgd	gene	gene_id YHL020C; gene_name OPI1; gene_source sgd; gene_biotype protein_coding;	-1	255	divergent	TRUE	TRUE	YHL020C	OPI1	mild_peak	any_peak_overlap
IG_2396_genes-complement	chr08	69548	69707	chr08	67633	69580	-	divergent	2396	sgd	gene	gene_id YHL019C; gene_name APM2; gene_source sgd; gene_biotype protein_coding;	-1	160	divergent	TRUE	TRUE	YHL019C	APM2	no_peak_overlap	no_peak_overlap
IG_2396_genes-complement	chr08	69548	69707	chr08	69684	70183	+	divergent	2396	sgd	gene	gene_id YHL018W; gene_source sgd; gene_biotype protein_coding;	1	160	divergent	TRUE	TRUE	YHL018W		no_peak_overlap	no_peak_overlap
IG_2397_genes-complement	chr08	70070	70275	chr08	70255	71962	+	tandemW	2397	sgd	gene	gene_id YHL017W; gene_source sgd; gene_biotype protein_coding;	1	206	tandem	TRUE	TRUE	YHL017W		no_peak_overlap	no_peak_overlap
IG_2399_genes-complement	chr08	74244	74698	chr08	71921	74276	-	divergent	2399	sgd	gene	gene_id YHL016C; gene_name DUR3; gene_source sgd; gene_biotype protein_coding;	-1	455	divergent	TRUE	TRUE	YHL016C	DUR3	no_peak_overlap	no_peak_overlap
IG_2399_genes-complement	chr08	74244	74698	chr08	74699	74782	+	divergent	2399	sgd	gene	gene_id YHL015W-A; gene_source sgd; gene_biotype protein_coding;	1	455	divergent	FALSE	TRUE	YHL015W-A		no_peak_overlap	no_peak_overlap
IG_240_genes-complement	chr02	299950	300165	chr02	300145	301342	+	tandemW	240	sgd	gene	gene_id YBR031W; gene_name RPL4A; gene_source sgd; gene_biotype protein_coding;	1	216	tandem	TRUE	TRUE	YBR031W	RPL4A	no_peak_overlap	no_peak_overlap
IG_2400_genes-complement	chr08	74782	75411	chr08	75377	75979	+	tandemW	2400	sgd	gene	gene_id YHL015W; gene_name RPS20; gene_source sgd; gene_biotype protein_coding;	1	630	tandem	TRUE	TRUE	YHL015W	RPS20	mild_peak	any_peak_overlap
IG_2402_genes-complement	chr08	77314	77429	chr08	75924	77329	-	tandemC	2402	sgd	gene	gene_id YHL014C; gene_name YLF2; gene_source sgd; gene_biotype protein_coding;	-1	116	tandem	TRUE	TRUE	YHL014C	YLF2	no_peak_overlap	no_peak_overlap
IG_2403_genes-complement	chr08	78353	78935	chr08	78881	80610	+	divergent	2403	sgd	gene	gene_id YHL012W; gene_source sgd; gene_biotype protein_coding;	1	583	divergent	TRUE	TRUE	YHL012W		no_peak_overlap	no_peak_overlap
IG_2403_genes-complement	chr08	78353	78935	chr08	77318	78374	-	divergent	2403	sgd	gene	gene_id YHL013C; gene_name OTU2; gene_source sgd; gene_biotype protein_coding;	-1	583	divergent	TRUE	TRUE	YHL013C	OTU2	no_peak_overlap	no_peak_overlap
IG_2405_genes-complement	chr08	81616	81963	chr08	80474	81713	-	tandemC	2405	sgd	gene	gene_id YHL011C; gene_name PRS3; gene_source sgd; gene_biotype protein_coding;	-1	348	tandem	TRUE	TRUE	YHL011C	PRS3	no_peak_overlap	no_peak_overlap
IG_2406_genes-complement	chr08	83721	84067	chr08	81870	83771	-	tandemC	2406	sgd	gene	gene_id YHL010C; gene_name ETP1; gene_source sgd; gene_biotype protein_coding;	-1	347	tandem	TRUE	TRUE	YHL010C	ETP1	no_peak_overlap	no_peak_overlap
IG_2407_genes-complement	chr08	85060	92626	chr08	83843	85171	-	tandemC	2407	sgd	gene	gene_id YHL009C; gene_name YAP3; gene_source sgd; gene_biotype protein_coding;	-1	7567	tandem	TRUE	TRUE	YHL009C	YAP3	no_peak_overlap	no_peak_overlap
IG_2408_genes-complement	chr08	94510	95117	chr08	92455	94575	-	tandemC	2408	sgd	gene	gene_id YHL008C; gene_source sgd; gene_biotype protein_coding;	-1	608	tandem	TRUE	TRUE	YHL008C		no_peak_overlap	no_peak_overlap
IG_241_genes-complement	chr02	301254	301518	chr02	301519	301821	+	tandemW	241	sgd	gene	gene_id YBR032W; gene_source sgd; gene_biotype protein_coding;	1	265	tandem	FALSE	TRUE	YBR032W		mild_peak	any_peak_overlap
IG_2410_genes-complement	chr08	98795	98827	chr08	98274	98858	-	tandemC	2410	sgd	gene	gene_id YHL006C; gene_name SHU1; gene_source sgd; gene_biotype protein_coding;	-1	33	tandem	TRUE	TRUE	YHL006C	SHU1	mild_peak	any_peak_overlap
IG_2412_genes-complement	chr08	101883	102586	chr08	100437	101999	-	tandemC	2412	sgd	gene	gene_id YHL003C; gene_name LAG1; gene_source sgd; gene_biotype protein_coding;	-1	704	tandem	TRUE	TRUE	YHL003C	LAG1	no_peak_overlap	no_peak_overlap
IG_2413_genes-complement	chr08	103970	104276	chr08	104244	105205	+	tandemW	2413	sgd	gene	gene_id YHL001W; gene_name RPL14B; gene_source sgd; gene_biotype protein_coding;	1	307	tandem	TRUE	TRUE	YHL001W	RPL14B	strong_peak	any_peak_overlap
IG_2414_genes-complement	chr08	105091	106054	chr08	106024	107461	+	tandemW	2414	sgd	gene	gene_id YHR001W; gene_name OSH7; gene_source sgd; gene_biotype protein_coding;	1	964	tandem	TRUE	TRUE	YHR001W	OSH7	mild_peak	any_peak_overlap
IG_2415_genes-complement	chr08	107368	107825	chr08	107762	108329	+	tandemW	2415	sgd	gene	gene_id YHR001W-A; gene_name QCR10; gene_source sgd; gene_biotype protein_coding;	1	458	tandem	TRUE	TRUE	YHR001W-A	QCR10	no_peak_overlap	no_peak_overlap
IG_2416_genes-complement	chr08	108122	108811	chr08	108686	110031	+	tandemW	2416	sgd	gene	gene_id YHR002W; gene_name LEU5; gene_source sgd; gene_biotype protein_coding;	1	690	tandem	TRUE	TRUE	YHR002W	LEU5	mild_peak	any_peak_overlap
IG_2418_genes-complement	chr08	111317	111753	chr08	109914	111328	-	tandemC	2418	sgd	gene	gene_id YHR003C; gene_name TCD1; gene_source sgd; gene_biotype protein_coding;	-1	437	tandem	TRUE	TRUE	YHR003C	TCD1	no_peak_overlap	no_peak_overlap
IG_2419_genes-complement	chr08	113094	113498	chr08	111549	113191	-	tandemC	2419	sgd	gene	gene_id YHR004C; gene_name NEM1; gene_source sgd; gene_biotype protein_coding;	-1	405	tandem	TRUE	TRUE	YHR004C	NEM1	no_peak_overlap	no_peak_overlap
IG_242_genes-complement	chr02	301821	301943	chr02	301872	304913	+	tandemW	242	sgd	gene	gene_id YBR033W; gene_name EDS1; gene_source sgd; gene_biotype protein_coding;	1	123	tandem	TRUE	TRUE	YBR033W	EDS1	no_peak_overlap	no_peak_overlap
IG_2420_genes-complement	chr08	114917	115619	chr08	113400	115007	-	tandemC	2420	sgd	gene	gene_id YHR005C; gene_name GPA1; gene_source sgd; gene_biotype protein_coding;	-1	703	tandem	TRUE	TRUE	YHR005C	GPA1	mild_peak	any_peak_overlap
IG_2421_genes-complement	chr08	115901	117813	chr08	115469	115934	-	divergent	2421	sgd	gene	gene_id YHR005C-A; gene_name TIM10; gene_source sgd; gene_biotype protein_coding;	-1	1913	divergent	TRUE	TRUE	YHR005C-A	TIM10	mild_peak	any_peak_overlap
IG_2421_genes-complement	chr08	115901	117813	chr08	117775	119553	+	divergent	2421	sgd	gene	gene_id YHR006W; gene_name STP2; gene_source sgd; gene_biotype protein_coding;	1	1913	divergent	TRUE	TRUE	YHR006W	STP2	mild_peak	any_peak_overlap
IG_2423_genes-complement	chr08	121683	122549	chr08	120065	121808	-	tandemC	2423	sgd	gene	gene_id YHR007C; gene_name ERG11; gene_source sgd; gene_biotype protein_coding;	-1	867	tandem	TRUE	TRUE	YHR007C	ERG11	strong_peak	any_peak_overlap
IG_2424_genes-complement	chr08	122765	122888	chr08	122534	122863	-	tandemC	2424	sgd	gene	gene_id YHR007C-A; gene_source sgd; gene_biotype protein_coding;	-1	124	tandem	TRUE	TRUE	YHR007C-A		strong_peak	any_peak_overlap
IG_2425_genes-complement	chr08	123590	124108	chr08	122743	123667	-	tandemC	2425	sgd	gene	gene_id YHR008C; gene_name SOD2; gene_source sgd; gene_biotype protein_coding;	-1	519	tandem	TRUE	TRUE	YHR008C	SOD2	mild_peak	any_peak_overlap
IG_2426_genes-complement	chr08	125680	126520	chr08	126487	127604	+	divergent	2426	sgd	gene	gene_id YHR010W; gene_name RPL27A; gene_source sgd; gene_biotype protein_coding;	1	841	divergent	TRUE	TRUE	YHR010W	RPL27A	mild_peak	any_peak_overlap
IG_2426_genes-complement	chr08	125680	126520	chr08	123973	125751	-	divergent	2426	sgd	gene	gene_id YHR009C; gene_name TDA3; gene_source sgd; gene_biotype protein_coding;	-1	841	divergent	TRUE	TRUE	YHR009C	TDA3	mild_peak	any_peak_overlap
IG_2427_genes-complement	chr08	127492	127779	chr08	127725	129216	+	tandemW	2427	sgd	gene	gene_id YHR011W; gene_name DIA4; gene_source sgd; gene_biotype protein_coding;	1	288	tandem	TRUE	TRUE	YHR011W	DIA4	no_peak_overlap	no_peak_overlap
IG_2428_genes-complement	chr08	129120	129480	chr08	129457	130601	+	tandemW	2428	sgd	gene	gene_id YHR012W; gene_name VPS29; gene_source sgd; gene_biotype protein_coding;	1	361	tandem	TRUE	TRUE	YHR012W	VPS29	no_peak_overlap	no_peak_overlap
IG_2430_genes-complement	chr08	131446	132046	chr08	132005	132967	+	divergent	2430	sgd	gene	gene_id YHR014W; gene_name SPO13; gene_source sgd; gene_biotype protein_coding;	1	601	divergent	TRUE	TRUE	YHR014W	SPO13	no_peak_overlap	no_peak_overlap
IG_2430_genes-complement	chr08	131446	132046	chr08	130629	131485	-	divergent	2430	sgd	gene	gene_id YHR013C; gene_name ARD1; gene_source sgd; gene_biotype protein_coding;	-1	601	divergent	TRUE	TRUE	YHR013C	ARD1	no_peak_overlap	no_peak_overlap
IG_2431_genes-complement	chr08	132922	134553	chr08	134515	136623	+	tandemW	2431	sgd	gene	gene_id YHR015W; gene_name MIP6; gene_source sgd; gene_biotype protein_coding;	1	1632	tandem	TRUE	TRUE	YHR015W	MIP6	mild_peak	any_peak_overlap
IG_2433_genes-complement	chr08	138455	138693	chr08	136718	138504	-	divergent	2433	sgd	gene	gene_id YHR016C; gene_name YSC84; gene_source sgd; gene_biotype protein_coding;	-1	239	divergent	TRUE	TRUE	YHR016C	YSC84	no_peak_overlap	no_peak_overlap
IG_2433_genes-complement	chr08	138455	138693	chr08	138679	139929	+	divergent	2433	sgd	gene	gene_id YHR017W; gene_name YSC83; gene_source sgd; gene_biotype protein_coding;	1	239	divergent	TRUE	TRUE	YHR017W	YSC83	no_peak_overlap	no_peak_overlap
IG_2435_genes-complement	chr08	141402	141893	chr08	139844	141454	-	tandemC	2435	sgd	gene	gene_id YHR018C; gene_name ARG4; gene_source sgd; gene_biotype protein_coding;	-1	492	tandem	TRUE	TRUE	YHR018C	ARG4	no_peak_overlap	no_peak_overlap
IG_2436_genes-complement	chr08	143558	143995	chr08	141785	143596	-	divergent	2436	sgd	gene	gene_id YHR019C; gene_name DED81; gene_source sgd; gene_biotype protein_coding;	-1	438	divergent	TRUE	TRUE	YHR019C	DED81	no_peak_overlap	no_peak_overlap
IG_2436_genes-complement	chr08	143558	143995	chr08	143888	146135	+	divergent	2436	sgd	gene	gene_id YHR020W; gene_source sgd; gene_biotype protein_coding;	1	438	divergent	TRUE	TRUE	YHR020W		no_peak_overlap	no_peak_overlap
IG_2438_genes-complement	chr08	148669	149224	chr08	149129	149789	+	divergent	2438	sgd	gene	gene_id YHR021W-A; gene_name ECM12; gene_source sgd; gene_biotype protein_coding;	1	556	divergent	TRUE	TRUE	YHR021W-A	ECM12	mild_peak	any_peak_overlap
IG_2438_genes-complement	chr08	148669	149224	chr08	147777	148727	-	divergent	2438	sgd	gene	gene_id YHR021C; gene_name RPS27B; gene_source sgd; gene_biotype protein_coding;	-1	556	divergent	TRUE	TRUE	YHR021C	RPS27B	mild_peak	any_peak_overlap
IG_2439_genes-complement	chr08	150345	151216	chr08	149384	150444	-	tandemC	2439	sgd	gene	gene_id YHR022C; gene_source sgd; gene_biotype protein_coding;	-1	872	tandem	TRUE	TRUE	YHR022C		strong_peak	any_peak_overlap
IG_244_genes-complement	chr02	305976	306268	chr02	304744	305999	-	tandemC	244	sgd	gene	gene_id YBR034C; gene_name HMT1; gene_source sgd; gene_biotype protein_coding;	-1	293	tandem	TRUE	TRUE	YBR034C	HMT1	mild_peak	any_peak_overlap
IG_2440_genes-complement	chr08	151306	151665	chr08	151612	157559	+	divergent	2440	sgd	gene	gene_id YHR023W; gene_name MYO1; gene_source sgd; gene_biotype protein_coding;	1	360	divergent	TRUE	TRUE	YHR023W	MYO1	strong_peak	any_peak_overlap
IG_2440_genes-complement	chr08	151306	151665	chr08	151109	151336	-	divergent	2440	sgd	gene	gene_id YHR022C-A; gene_source sgd; gene_biotype protein_coding;	-1	360	divergent	TRUE	TRUE	YHR022C-A		strong_peak	any_peak_overlap
IG_2442_genes-complement	chr08	159192	159437	chr08	157544	159216	-	divergent	2442	sgd	gene	gene_id YHR024C; gene_name MAS2; gene_source sgd; gene_biotype protein_coding;	-1	246	divergent	TRUE	TRUE	YHR024C	MAS2	no_peak_overlap	no_peak_overlap
IG_2442_genes-complement	chr08	159192	159437	chr08	159402	160591	+	divergent	2442	sgd	gene	gene_id YHR025W; gene_name THR1; gene_source sgd; gene_biotype protein_coding;	1	246	divergent	TRUE	TRUE	YHR025W	THR1	no_peak_overlap	no_peak_overlap
IG_2443_genes-complement	chr08	160511	160843	chr08	160724	161673	+	tandemW	2443	sgd	gene	gene_id YHR026W; gene_name VMA16; gene_source sgd; gene_biotype protein_coding;	1	333	tandem	TRUE	TRUE	YHR026W	VMA16	no_peak_overlap	no_peak_overlap
IG_2445_genes-complement	chr08	164711	164977	chr08	161594	164755	-	tandemC	2445	sgd	gene	gene_id YHR027C; gene_name RPN1; gene_source sgd; gene_biotype protein_coding;	-1	267	tandem	TRUE	TRUE	YHR027C	RPN1	no_peak_overlap	no_peak_overlap
IG_2447_genes-complement	chr08	168561	168889	chr08	167589	168592	-	tandemC	2447	sgd	gene	gene_id YHR029C; gene_name YHI9; gene_source sgd; gene_biotype protein_coding;	-1	329	tandem	TRUE	TRUE	YHR029C	YHI9	no_peak_overlap	no_peak_overlap
IG_2448_genes-complement	chr08	170344	170798	chr08	168752	170401	-	tandemC	2448	sgd	gene	gene_id YHR030C; gene_name SLT2; gene_source sgd; gene_biotype protein_coding;	-1	455	tandem	TRUE	TRUE	YHR030C	SLT2	no_peak_overlap	no_peak_overlap
IG_2449_genes-complement	chr08	172970	173343	chr08	170649	173007	-	divergent	2449	sgd	gene	gene_id YHR031C; gene_name RRM3; gene_source sgd; gene_biotype protein_coding;	-1	374	divergent	TRUE	TRUE	YHR031C	RRM3	mild_peak	any_peak_overlap
IG_2449_genes-complement	chr08	172970	173343	chr08	173344	175089	+	divergent	2449	sgd	gene	gene_id YHR032W; gene_name ERC1; gene_source sgd; gene_biotype protein_coding;	1	374	divergent	FALSE	TRUE	YHR032W	ERC1	mild_peak	any_peak_overlap
IG_245_genes-complement	chr02	306955	309080	chr02	306149	306981	-	tandemC	245	sgd	gene	gene_id YBR035C; gene_name PDX3; gene_source sgd; gene_biotype protein_coding;	-1	2126	tandem	TRUE	TRUE	YBR035C	PDX3	mild_peak	any_peak_overlap
IG_2450_genes-complement	chr08	175089	175194	chr08	175123	175508	+	tandemW	2450	sgd	gene	gene_id YHR032W-A; gene_source sgd; gene_biotype protein_coding;	1	106	tandem	TRUE	TRUE	YHR032W-A		strong_peak	any_peak_overlap
IG_2451_genes-complement	chr08	175394	175547	chr08	175273	175473	-	divergent	2451	sgd	gene	gene_id YHR032C-A; gene_source sgd; gene_biotype protein_coding;	-1	154	divergent	TRUE	TRUE	YHR032C-A		strong_peak	any_peak_overlap
IG_2451_genes-complement	chr08	175394	175547	chr08	175504	176945	+	divergent	2451	sgd	gene	gene_id YHR033W; gene_source sgd; gene_biotype protein_coding;	1	154	divergent	TRUE	TRUE	YHR033W		strong_peak	any_peak_overlap
IG_2453_genes-complement	chr08	177999	178218	chr08	176920	178023	-	divergent	2453	sgd	gene	gene_id YHR034C; gene_name PIH1; gene_source sgd; gene_biotype protein_coding;	-1	220	divergent	TRUE	TRUE	YHR034C	PIH1	no_peak_overlap	no_peak_overlap
IG_2453_genes-complement	chr08	177999	178218	chr08	178186	180322	+	divergent	2453	sgd	gene	gene_id YHR035W; gene_name NEL1; gene_source sgd; gene_biotype protein_coding;	1	220	divergent	TRUE	TRUE	YHR035W	NEL1	no_peak_overlap	no_peak_overlap
IG_2454_genes-complement	chr08	180111	180344	chr08	180226	181968	+	tandemW	2454	sgd	gene	gene_id YHR036W; gene_name BRL1; gene_source sgd; gene_biotype protein_coding;	1	234	tandem	TRUE	TRUE	YHR036W	BRL1	no_peak_overlap	no_peak_overlap
IG_2455_genes-complement	chr08	181760	181976	chr08	181930	183862	+	tandemW	2455	sgd	gene	gene_id YHR037W; gene_name PUT2; gene_source sgd; gene_biotype protein_coding;	1	217	tandem	TRUE	TRUE	YHR037W	PUT2	no_peak_overlap	no_peak_overlap
IG_2456_genes-complement	chr08	183704	184065	chr08	184039	184856	+	tandemW	2456	sgd	gene	gene_id YHR038W; gene_name RRF1; gene_source sgd; gene_biotype protein_coding;	1	362	tandem	TRUE	TRUE	YHR038W	RRF1	no_peak_overlap	no_peak_overlap
IG_2458_genes-complement	chr08	186809	187172	chr08	184754	186907	-	tandemC	2458	sgd	gene	gene_id YHR039C; gene_name MSC7; gene_source sgd; gene_biotype protein_coding;	-1	364	tandem	TRUE	TRUE	YHR039C	MSC7	no_peak_overlap	no_peak_overlap
IG_2459_genes-complement	chr08	187679	187923	chr08	187075	187700	-	divergent	2459	sgd	gene	gene_id YHR039C-A; gene_name VMA10; gene_source sgd; gene_biotype protein_coding;	-1	245	divergent	TRUE	TRUE	YHR039C-A	VMA10	no_peak_overlap	no_peak_overlap
IG_2459_genes-complement	chr08	187679	187923	chr08	187896	189103	+	divergent	2459	sgd	gene	gene_id YHR040W; gene_name BCD1; gene_source sgd; gene_biotype protein_coding;	1	245	divergent	TRUE	TRUE	YHR040W	BCD1	no_peak_overlap	no_peak_overlap
IG_246_genes-complement	chr02	310313	310564	chr02	308892	310354	-	tandemC	246	sgd	gene	gene_id YBR036C; gene_name CSG2; gene_source sgd; gene_biotype protein_coding;	-1	252	tandem	TRUE	TRUE	YBR036C	CSG2	mild_peak	any_peak_overlap
IG_2461_genes-complement	chr08	189864	190542	chr08	189014	189877	-	divergent	2461	sgd	gene	gene_id YHR041C; gene_name SRB2; gene_source sgd; gene_biotype protein_coding;	-1	679	divergent	TRUE	TRUE	YHR041C	SRB2	mild_peak	any_peak_overlap
IG_2461_genes-complement	chr08	189864	190542	chr08	190497	192777	+	divergent	2461	sgd	gene	gene_id YHR042W; gene_name NCP1; gene_source sgd; gene_biotype protein_coding;	1	679	divergent	TRUE	TRUE	YHR042W	NCP1	mild_peak	any_peak_overlap
IG_2463_genes-complement	chr08	193545	194067	chr08	192703	193638	-	tandemC	2463	sgd	gene	gene_id YHR043C; gene_name DOG2; gene_source sgd; gene_biotype protein_coding;	-1	523	tandem	TRUE	TRUE	YHR043C	DOG2	no_peak_overlap	no_peak_overlap
IG_2464_genes-complement	chr08	194808	195550	chr08	195434	197302	+	divergent	2464	sgd	gene	gene_id YHR045W; gene_source sgd; gene_biotype protein_coding;	1	743	divergent	TRUE	TRUE	YHR045W		no_peak_overlap	no_peak_overlap
IG_2464_genes-complement	chr08	194808	195550	chr08	193932	194843	-	divergent	2464	sgd	gene	gene_id YHR044C; gene_name DOG1; gene_source sgd; gene_biotype protein_coding;	-1	743	divergent	TRUE	TRUE	YHR044C	DOG1	no_peak_overlap	no_peak_overlap
IG_2466_genes-complement	chr08	198285	198739	chr08	197223	198345	-	tandemC	2466	sgd	gene	gene_id YHR046C; gene_name INM1; gene_source sgd; gene_biotype protein_coding;	-1	455	tandem	TRUE	TRUE	YHR046C	INM1	no_peak_overlap	no_peak_overlap
IG_2467_genes-complement	chr08	201310	204606	chr08	198588	201353	-	divergent	2467	sgd	gene	gene_id YHR047C; gene_name AAP1; gene_source sgd; gene_biotype protein_coding;	-1	3297	divergent	TRUE	TRUE	YHR047C	AAP1	strong_peak	any_peak_overlap
IG_2467_genes-complement	chr08	201310	204606	chr08	204521	206376	+	divergent	2467	sgd	gene	gene_id YHR048W; gene_name YHK8; gene_source sgd; gene_biotype protein_coding;	1	3297	divergent	TRUE	TRUE	YHR048W	YHK8	strong_peak	any_peak_overlap
IG_2468_genes-complement	chr08	206151	206461	chr08	206417	207317	+	tandemW	2468	sgd	gene	gene_id YHR049W; gene_name FSH1; gene_source sgd; gene_biotype protein_coding;	1	311	tandem	TRUE	TRUE	YHR049W	FSH1	mild_peak	any_peak_overlap
IG_247_genes-complement	chr02	311452	311897	chr02	311848	314969	+	divergent	247	sgd	gene	gene_id YBR038W; gene_name CHS2; gene_source sgd; gene_biotype protein_coding;	1	446	divergent	TRUE	TRUE	YBR038W	CHS2	strong_peak	any_peak_overlap
IG_247_genes-complement	chr02	311452	311897	chr02	310491	311482	-	divergent	247	sgd	gene	gene_id YBR037C; gene_name SCO1; gene_source sgd; gene_biotype protein_coding;	-1	446	divergent	TRUE	TRUE	YBR037C	SCO1	strong_peak	any_peak_overlap
IG_2470_genes-complement	chr08	207530	207653	chr08	207119	207602	-	divergent	2470	sgd	gene	gene_id YHR049C-A; gene_source sgd; gene_biotype protein_coding;	-1	124	divergent	TRUE	TRUE	YHR049C-A		no_peak_overlap	no_peak_overlap
IG_2470_genes-complement	chr08	207530	207653	chr08	207546	209357	+	divergent	2470	sgd	gene	gene_id YHR050W; gene_name SMF2; gene_source sgd; gene_biotype protein_coding;	1	124	divergent	TRUE	TRUE	YHR050W	SMF2	no_peak_overlap	no_peak_overlap
IG_2471_genes-complement	chr08	209303	209474	chr08	209401	209792	+	tandemW	2471	sgd	gene	gene_id YHR050W-A; gene_source sgd; gene_biotype protein_coding;	1	172	tandem	TRUE	TRUE	YHR050W-A		no_peak_overlap	no_peak_overlap
IG_2472_genes-complement	chr08	209645	209704	chr08	209590	210264	+	tandemW	2472	sgd	gene	gene_id YHR051W; gene_name COX6; gene_source sgd; gene_biotype protein_coding;	1	60	tandem	TRUE	TRUE	YHR051W	COX6	no_peak_overlap	no_peak_overlap
IG_2473_genes-complement	chr08	210151	210847	chr08	210813	212107	+	tandemW	2473	sgd	gene	gene_id YHR052W; gene_name CIC1; gene_source sgd; gene_biotype protein_coding;	1	697	tandem	TRUE	TRUE	YHR052W	CIC1	no_peak_overlap	no_peak_overlap
IG_2474_genes-complement	chr08	211978	212509	chr08	212510	212704	+	tandemW	2474	sgd	gene	gene_id YHR052W-A; gene_source sgd; gene_biotype protein_coding;	1	532	tandem	FALSE	TRUE	YHR052W-A		no_peak_overlap	no_peak_overlap
IG_2475_genes-complement	chr08	212720	213184	chr08	212535	212720	-	tandemC	2475	sgd	gene	gene_id YHR053C; gene_name CUP1-1; gene_source sgd; gene_biotype protein_coding;	-1	465	tandem	FALSE	TRUE	YHR053C	CUP1-1	no_peak_overlap	no_peak_overlap
IG_2476_genes-complement	chr08	214249	214507	chr08	213185	214249	-	divergent	2476	sgd	gene	gene_id YHR054C; gene_source sgd; gene_biotype protein_coding;	-1	259	divergent	FALSE	TRUE	YHR054C		no_peak_overlap	no_peak_overlap
IG_2476_genes-complement	chr08	214249	214507	chr08	214508	214702	+	divergent	2476	sgd	gene	gene_id YHR054W-A; gene_source sgd; gene_biotype protein_coding;	1	259	divergent	FALSE	TRUE	YHR054W-A		no_peak_overlap	no_peak_overlap
IG_2477_genes-complement	chr08	214718	215182	chr08	214533	214718	-	tandemC	2477	sgd	gene	gene_id YHR055C; gene_name CUP1-2; gene_source sgd; gene_biotype protein_coding;	-1	465	tandem	FALSE	TRUE	YHR055C	CUP1-2	no_peak_overlap	no_peak_overlap
IG_2479_genes-complement	chr08	218843	218996	chr08	218145	218860	-	tandemC	2479	sgd	gene	gene_id YHR057C; gene_name CPR2; gene_source sgd; gene_biotype protein_coding;	-1	154	tandem	TRUE	TRUE	YHR057C	CPR2	no_peak_overlap	no_peak_overlap
IG_248_genes-complement	chr02	314789	315574	chr02	315517	316687	+	tandemW	248	sgd	gene	gene_id YBR039W; gene_name ATP3; gene_source sgd; gene_biotype protein_coding;	1	786	tandem	TRUE	TRUE	YBR039W	ATP3	mild_peak	any_peak_overlap
IG_2480_genes-complement	chr08	219884	220107	chr08	218936	219907	-	divergent	2480	sgd	gene	gene_id YHR058C; gene_name MED6; gene_source sgd; gene_biotype protein_coding;	-1	224	divergent	TRUE	TRUE	YHR058C	MED6	no_peak_overlap	no_peak_overlap
IG_2480_genes-complement	chr08	219884	220107	chr08	220052	220603	+	divergent	2480	sgd	gene	gene_id YHR059W; gene_name FYV4; gene_source sgd; gene_biotype protein_coding;	1	224	divergent	TRUE	TRUE	YHR059W	FYV4	no_peak_overlap	no_peak_overlap
IG_2481_genes-complement	chr08	220500	220724	chr08	220707	221343	+	tandemW	2481	sgd	gene	gene_id YHR060W; gene_name VMA22; gene_source sgd; gene_biotype protein_coding;	1	225	tandem	TRUE	TRUE	YHR060W	VMA22	no_peak_overlap	no_peak_overlap
IG_2483_genes-complement	chr08	222478	222876	chr08	221314	222536	-	tandemC	2483	sgd	gene	gene_id YHR061C; gene_name GIC1; gene_source sgd; gene_biotype protein_coding;	-1	399	tandem	TRUE	TRUE	YHR061C	GIC1	no_peak_overlap	no_peak_overlap
IG_2484_genes-complement	chr08	223758	224029	chr08	222784	223782	-	tandemC	2484	sgd	gene	gene_id YHR062C; gene_name RPP1; gene_source sgd; gene_biotype protein_coding;	-1	272	tandem	TRUE	TRUE	YHR062C	RPP1	no_peak_overlap	no_peak_overlap
IG_2485_genes-complement	chr08	225169	225441	chr08	223945	225203	-	divergent	2485	sgd	gene	gene_id YHR063C; gene_name PAN5; gene_source sgd; gene_biotype protein_coding;	-1	273	divergent	TRUE	TRUE	YHR063C	PAN5	no_peak_overlap	no_peak_overlap
IG_2485_genes-complement	chr08	225169	225441	chr08	225442	225777	+	divergent	2485	sgd	gene	gene_id YHR063W-A; gene_source sgd; gene_biotype protein_coding;	1	273	divergent	FALSE	TRUE	YHR063W-A		no_peak_overlap	no_peak_overlap
IG_2486_genes-complement	chr08	227141	227531	chr08	225422	227177	-	tandemC	2486	sgd	gene	gene_id YHR064C; gene_name SSZ1; gene_source sgd; gene_biotype protein_coding;	-1	391	tandem	TRUE	TRUE	YHR064C	SSZ1	mild_peak	any_peak_overlap
IG_2487_genes-complement	chr08	229037	229334	chr08	227418	229078	-	divergent	2487	sgd	gene	gene_id YHR065C; gene_name RRP3; gene_source sgd; gene_biotype protein_coding;	-1	298	divergent	TRUE	TRUE	YHR065C	RRP3	no_peak_overlap	no_peak_overlap
IG_2487_genes-complement	chr08	229037	229334	chr08	229286	230822	+	divergent	2487	sgd	gene	gene_id YHR066W; gene_name SSF1; gene_source sgd; gene_biotype protein_coding;	1	298	divergent	TRUE	TRUE	YHR066W	SSF1	no_peak_overlap	no_peak_overlap
IG_2488_genes-complement	chr08	230696	230969	chr08	230938	232027	+	tandemW	2488	sgd	gene	gene_id YHR067W; gene_name HTD2; gene_source sgd; gene_biotype protein_coding;	1	274	tandem	TRUE	TRUE	YHR067W	HTD2	no_peak_overlap	no_peak_overlap
IG_2489_genes-complement	chr08	231812	232132	chr08	232074	233440	+	tandemW	2489	sgd	gene	gene_id YHR068W; gene_name DYS1; gene_source sgd; gene_biotype protein_coding;	1	321	tandem	TRUE	TRUE	YHR068W	DYS1	no_peak_overlap	no_peak_overlap
IG_249_genes-complement	chr02	316510	316967	chr02	316940	318031	+	tandemW	249	sgd	gene	gene_id YBR040W; gene_name FIG1; gene_source sgd; gene_biotype protein_coding;	1	458	tandem	TRUE	TRUE	YBR040W	FIG1	no_peak_overlap	no_peak_overlap
IG_2491_genes-complement	chr08	234658	234873	chr08	233416	234683	-	tandemC	2491	sgd	gene	gene_id YHR069C; gene_name RRP4; gene_source sgd; gene_biotype protein_coding;	-1	216	tandem	TRUE	TRUE	YHR069C	RRP4	no_peak_overlap	no_peak_overlap
IG_2492_genes-complement	chr08	236512	237003	chr08	236102	236512	-	divergent	2492	sgd	gene	gene_id YHR070C-A; gene_source sgd; gene_biotype protein_coding;	-1	492	divergent	FALSE	TRUE	YHR070C-A		strong_peak	any_peak_overlap
IG_2492_genes-complement	chr08	236512	237003	chr08	236964	237754	+	divergent	2492	sgd	gene	gene_id YHR071W; gene_name PCL5; gene_source sgd; gene_biotype protein_coding;	1	492	divergent	TRUE	TRUE	YHR071W	PCL5	strong_peak	any_peak_overlap
IG_2494_genes-complement	chr08	241293	241663	chr08	241606	241999	+	tandemW	2494	sgd	gene	gene_id YHR072W-A; gene_name NOP10; gene_source sgd; gene_biotype protein_coding;	1	371	tandem	TRUE	TRUE	YHR072W-A	NOP10	no_peak_overlap	no_peak_overlap
IG_2495_genes-complement	chr08	241840	242581	chr08	242502	245725	+	tandemW	2495	sgd	gene	gene_id YHR073W; gene_name OSH3; gene_source sgd; gene_biotype protein_coding;	1	742	tandem	TRUE	TRUE	YHR073W	OSH3	no_peak_overlap	no_peak_overlap
IG_2496_genes-complement	chr08	245572	246192	chr08	246148	248470	+	tandemW	2496	sgd	gene	gene_id YHR074W; gene_name QNS1; gene_source sgd; gene_biotype protein_coding;	1	621	tandem	TRUE	TRUE	YHR074W	QNS1	mild_peak	any_peak_overlap
IG_2498_genes-complement	chr08	249641	251100	chr08	248348	249688	-	divergent	2498	sgd	gene	gene_id YHR075C; gene_name PPE1; gene_source sgd; gene_biotype protein_coding;	-1	1460	divergent	TRUE	TRUE	YHR075C	PPE1	no_peak_overlap	no_peak_overlap
IG_2498_genes-complement	chr08	249641	251100	chr08	251072	252366	+	divergent	2498	sgd	gene	gene_id YHR076W; gene_name PTC7; gene_source sgd; gene_biotype protein_coding;	1	1460	divergent	TRUE	TRUE	YHR076W	PTC7	no_peak_overlap	no_peak_overlap
IG_25_genes-complement	chr01	56857	57028	chr01	54932	56881	-	tandemC	25	sgd	gene	gene_id YAL047C; gene_name SPC72; gene_source sgd; gene_biotype protein_coding;	-1	172	tandem	TRUE	TRUE	YAL047C	SPC72	no_peak_overlap	no_peak_overlap
IG_250_genes-complement	chr02	317864	318265	chr02	318210	320426	+	tandemW	250	sgd	gene	gene_id YBR041W; gene_name FAT1; gene_source sgd; gene_biotype protein_coding;	1	402	tandem	TRUE	TRUE	YBR041W	FAT1	no_peak_overlap	no_peak_overlap
IG_2500_genes-complement	chr08	255756	256359	chr08	252278	255817	-	divergent	2500	sgd	gene	gene_id YHR077C; gene_name NMD2; gene_source sgd; gene_biotype protein_coding;	-1	604	divergent	TRUE	TRUE	YHR077C	NMD2	mild_peak	any_peak_overlap
IG_2500_genes-complement	chr08	255756	256359	chr08	256314	258142	+	divergent	2500	sgd	gene	gene_id YHR078W; gene_source sgd; gene_biotype protein_coding;	1	604	divergent	TRUE	TRUE	YHR078W		mild_peak	any_peak_overlap
IG_2502_genes-complement	chr08	261591	262191	chr08	258030	261627	-	tandemC	2502	sgd	gene	gene_id YHR079C; gene_name IRE1; gene_source sgd; gene_biotype protein_coding;	-1	601	tandem	TRUE	TRUE	YHR079C	IRE1	no_peak_overlap	no_peak_overlap
IG_2503_genes-complement	chr08	262553	262800	chr08	262192	262553	-	tandemC	2503	sgd	gene	gene_id YHR079C-A; gene_name SAE3; gene_source sgd; gene_biotype protein_coding;	-1	248	tandem	FALSE	TRUE	YHR079C-A	SAE3	no_peak_overlap	no_peak_overlap
IG_2504_genes-complement	chr08	266838	267537	chr08	262746	266897	-	divergent	2504	sgd	gene	gene_id YHR080C; gene_name LAM4; gene_source sgd; gene_biotype protein_coding;	-1	700	divergent	TRUE	TRUE	YHR080C	LAM4	mild_peak	any_peak_overlap
IG_2504_genes-complement	chr08	266838	267537	chr08	267512	268235	+	divergent	2504	sgd	gene	gene_id YHR081W; gene_name LRP1; gene_source sgd; gene_biotype protein_coding;	1	700	divergent	TRUE	TRUE	YHR081W	LRP1	mild_peak	any_peak_overlap
IG_2506_genes-complement	chr08	271548	272626	chr08	268224	271619	-	divergent	2506	sgd	gene	gene_id YHR082C; gene_name KSP1; gene_source sgd; gene_biotype protein_coding;	-1	1079	divergent	TRUE	TRUE	YHR082C	KSP1	mild_peak	any_peak_overlap
IG_2506_genes-complement	chr08	271548	272626	chr08	272614	273707	+	divergent	2506	sgd	gene	gene_id YHR083W; gene_name SAM35; gene_source sgd; gene_biotype protein_coding;	1	1079	divergent	TRUE	TRUE	YHR083W	SAM35	mild_peak	any_peak_overlap
IG_2507_genes-complement	chr08	273616	274173	chr08	274110	276405	+	tandemW	2507	sgd	gene	gene_id YHR084W; gene_name STE12; gene_source sgd; gene_biotype protein_coding;	1	558	tandem	TRUE	TRUE	YHR084W	STE12	no_peak_overlap	no_peak_overlap
IG_2508_genes-complement	chr08	276240	276763	chr08	276735	277843	+	tandemW	2508	sgd	gene	gene_id YHR085W; gene_name IPI1; gene_source sgd; gene_biotype protein_coding;	1	524	tandem	TRUE	TRUE	YHR085W	IPI1	no_peak_overlap	no_peak_overlap
IG_2509_genes-complement	chr08	277768	278152	chr08	278038	279889	+	tandemW	2509	sgd	gene	gene_id YHR086W; gene_name NAM8; gene_source sgd; gene_biotype protein_coding;	1	385	tandem	TRUE	TRUE	YHR086W	NAM8	no_peak_overlap	no_peak_overlap
IG_2510_genes-complement	chr08	279724	280230	chr08	280231	280392	+	tandemW	2510	sgd	gene	gene_id YHR086W-A; gene_source sgd; gene_biotype protein_coding;	1	507	tandem	FALSE	TRUE	YHR086W-A		no_peak_overlap	no_peak_overlap
IG_2511_genes-complement	chr08	280392	280819	chr08	280744	281342	+	tandemW	2511	sgd	gene	gene_id YHR087W; gene_name RTC3; gene_source sgd; gene_biotype protein_coding;	1	428	tandem	TRUE	TRUE	YHR087W	RTC3	mild_peak	any_peak_overlap
IG_2512_genes-complement	chr08	281155	281494	chr08	281462	282485	+	tandemW	2512	sgd	gene	gene_id YHR088W; gene_name RPF1; gene_source sgd; gene_biotype protein_coding;	1	340	tandem	TRUE	TRUE	YHR088W	RPF1	no_peak_overlap	no_peak_overlap
IG_2514_genes-complement	chr08	283298	283776	chr08	282492	283344	-	tandemC	2514	sgd	gene	gene_id YHR089C; gene_name GAR1; gene_source sgd; gene_biotype protein_coding;	-1	479	tandem	TRUE	TRUE	YHR089C	GAR1	mild_peak	any_peak_overlap
IG_2515_genes-complement	chr08	284625	284838	chr08	283530	284649	-	tandemC	2515	sgd	gene	gene_id YHR090C; gene_name YNG2; gene_source sgd; gene_biotype protein_coding;	-1	214	tandem	TRUE	TRUE	YHR090C	YNG2	no_peak_overlap	no_peak_overlap
IG_2516_genes-complement	chr08	286770	287080	chr08	284745	286806	-	tandemC	2516	sgd	gene	gene_id YHR091C; gene_name MSR1; gene_source sgd; gene_biotype protein_coding;	-1	311	tandem	TRUE	TRUE	YHR091C	MSR1	no_peak_overlap	no_peak_overlap
IG_2517_genes-complement	chr08	288811	289141	chr08	289142	289690	+	divergent	2517	sgd	gene	gene_id YHR093W; gene_name AHT1; gene_source sgd; gene_biotype protein_coding;	1	331	divergent	FALSE	TRUE	YHR093W	AHT1	mild_peak	any_peak_overlap
IG_2517_genes-complement	chr08	288811	289141	chr08	286974	288881	-	divergent	2517	sgd	gene	gene_id YHR092C; gene_name HXT4; gene_source sgd; gene_biotype protein_coding;	-1	331	divergent	TRUE	TRUE	YHR092C	HXT4	mild_peak	any_peak_overlap
IG_2519_genes-complement	chr08	292625	292942	chr08	290816	292660	-	divergent	2519	sgd	gene	gene_id YHR094C; gene_name HXT1; gene_source sgd; gene_biotype protein_coding;	-1	318	divergent	TRUE	TRUE	YHR094C	HXT1	no_peak_overlap	no_peak_overlap
IG_2519_genes-complement	chr08	292625	292942	chr08	292843	293520	+	divergent	2519	sgd	gene	gene_id YHR095W; gene_source sgd; gene_biotype protein_coding;	1	318	divergent	TRUE	TRUE	YHR095W		no_peak_overlap	no_peak_overlap
IG_252_genes-complement	chr02	321609	321875	chr02	320322	321653	-	tandemC	252	sgd	gene	gene_id YBR042C; gene_name CST26; gene_source sgd; gene_biotype protein_coding;	-1	267	tandem	TRUE	TRUE	YBR042C	CST26	no_peak_overlap	no_peak_overlap
IG_2521_genes-complement	chr08	296447	297384	chr08	294467	296514	-	tandemC	2521	sgd	gene	gene_id YHR096C; gene_name HXT5; gene_source sgd; gene_biotype protein_coding;	-1	938	tandem	TRUE	TRUE	YHR096C	HXT5	strong_peak	any_peak_overlap
IG_2522_genes-complement	chr08	298609	299144	chr08	297267	298653	-	tandemC	2522	sgd	gene	gene_id YHR097C; gene_source sgd; gene_biotype protein_coding;	-1	536	tandem	TRUE	TRUE	YHR097C		strong_peak	any_peak_overlap
IG_2523_genes-complement	chr08	301934	302760	chr08	302672	314112	+	divergent	2523	sgd	gene	gene_id YHR099W; gene_name TRA1; gene_source sgd; gene_biotype protein_coding;	1	827	divergent	TRUE	TRUE	YHR099W	TRA1	mild_peak	any_peak_overlap
IG_2523_genes-complement	chr08	301934	302760	chr08	299006	302014	-	divergent	2523	sgd	gene	gene_id YHR098C; gene_name SFB3; gene_source sgd; gene_biotype protein_coding;	-1	827	divergent	TRUE	TRUE	YHR098C	SFB3	mild_peak	any_peak_overlap
IG_2525_genes-complement	chr08	314673	314873	chr08	314039	314716	-	tandemC	2525	sgd	gene	gene_id YHR100C; gene_name GEP4; gene_source sgd; gene_biotype protein_coding;	-1	201	tandem	TRUE	TRUE	YHR100C	GEP4	no_peak_overlap	no_peak_overlap
IG_2526_genes-complement	chr08	315968	316571	chr08	314682	315997	-	divergent	2526	sgd	gene	gene_id YHR101C; gene_name BIG1; gene_source sgd; gene_biotype protein_coding;	-1	604	divergent	TRUE	TRUE	YHR101C	BIG1	no_peak_overlap	no_peak_overlap
IG_2526_genes-complement	chr08	315968	316571	chr08	316461	319914	+	divergent	2526	sgd	gene	gene_id YHR102W; gene_name KIC1; gene_source sgd; gene_biotype protein_coding;	1	604	divergent	TRUE	TRUE	YHR102W	KIC1	no_peak_overlap	no_peak_overlap
IG_2527_genes-complement	chr08	319814	320413	chr08	320332	323142	+	tandemW	2527	sgd	gene	gene_id YHR103W; gene_name SBE22; gene_source sgd; gene_biotype protein_coding;	1	600	tandem	TRUE	TRUE	YHR103W	SBE22	mild_peak	any_peak_overlap
IG_2528_genes-complement	chr08	322972	323408	chr08	323332	324550	+	tandemW	2528	sgd	gene	gene_id YHR104W; gene_name GRE3; gene_source sgd; gene_biotype protein_coding;	1	437	tandem	TRUE	TRUE	YHR104W	GRE3	no_peak_overlap	no_peak_overlap
[truncated: 4,215 more rows]
