# Supplementary material for: Intergenic accumulation of RNA polymerase II maintains the potential for swift transcriptional restart upon release from quiescence
Source: HighWire-hosted journal article supplement (doi:10.1101/gr.279874.124), 2025-08-12
Supplement: Supplemental_Table_S4.xlsx [file Supplemental_Table_S4.xlsx]

## Sheet: README
gene_id	gene id or systematic name
gene_name	gene standard name
cluster_deepTools_release	release cluster based on 4tu-seq (Cucinotta et al., 2021), as described in figure 6A
transcription_status_Q_simple	transcription status in quiescence (figure 3A)
IG_name	intergene code name
type2	intergene type (divergent, tandem)
summit_chr	summit of MACS2-called peak chromosome
summit_start	summit of MACS2-called peak start
summit_end	summit of MACS2-called peak end (start+1)
peak_name	MACS2 peak name (out of 1958 called peaks in quiescence)
DIST_TSS	distance from summit to TSS
Q_summit_type	whether the summit belongs to a MACS2-called peak with a signal value >2.4 (strong) or not (mild)
signalValue	signalValue of MACS2 (narrowPeak)
pValue	pValue of MACS2 (narrowPeak)
score	score of MACS2 (narrowPeak)
Q_upstream_counts	Rpb3-FLAG counts in the whole intergene upstream of the gene (normalized by intergene size)
summit_presence	whether the intergene contains a summit of a MACS2-called peak
transcription_during_PDS	whether the gene is transcribed in the early post-diauxic shift phase (day1-HD samples), based on binarized Rpb3-FLAG counts over gene body
transcription_during_Qlike	whether the gene is transcribed in quiescence induced by abrupt starvation (Q-like samples), based on binarized Rpb3-FLAG counts over gene body
transcription_during_Q	whether the gene is transcribed in quiescence induced by nutrient exhaustion (Q-like samples), based on binarized Rpb3-FLAG and 4tu-seq (Cucinotta et al., 2021) counts over gene body
transcription_during_fermentation	whether the gene is transcribed during fermentation (Log samples), based on binarized Rpb3-FLAG counts over gene body
not_transcribed_during_entry	whether the gene is not bound by Rpb3-FLAG during entry into quiescence (Log or day1-HD), based on binarized Rpb3-FLAG counts over gene body
transcription_during_growth	whether the gene is bound by Rpb3-FLAG during entry into quiescence (Log or day1-HD), based on binarized Rpb3-FLAG counts over gene body

## Sheet: Qsummits_in_promoter_bearing
gene_id	gene_name	cluster_deepTools_release	transcription_status_Q_simple	IG_name	type2	summit_chr	summit_start	summit_end	peak_name	DIST_TSS	Q_summit_type	signalValue	pValue	score	Q_upstream_counts	summit_presence	transcription_during_PDS	transcription_during_Qlike	transcription_during_Q	transcription_during_fermentation	not_transcribed_during_entry	transcription_during_growth
YAL001C	TFC3	R-II	class_III	IG_71_genes-complement	divergent	chr01	151220	151221	6d_IP_vs_untagged_cer_reps_peak_17	-6	mild	1.59654	18.1313	169	34.9741	any	0	0	0	0	1	0
YAL002W	VPS8	R-III	class_III	IG_69_genes-complement	tandem						no summit upstream				35.4007	none	0	0	0	1	0	1
YAL003W	EFB1	R-I	class_III	IG_68_genes-complement	divergent	chr01	141835	141836	6d_IP_vs_untagged_cer_reps_peak_16	-308	strong	2.82837	126.397	1245	62.6962	any	1	0	0	1	0	1
YAL005C	SSA1	R-II	class_III	IG_68_genes-complement	divergent	chr01	141835	141836	6d_IP_vs_untagged_cer_reps_peak_16	-342	strong	2.82837	126.397	1245	62.6962	any	1	0	0	1	0	1
YAL007C	ERP2	R-III	class_IV	IG_67_genes-complement	tandem						no summit upstream				30.4226	none	1	0	0	1	0	1
YAL008W	FUN14	R-III	class_III	IG_65_genes-complement	tandem						no summit upstream				22.7948	none	1	0	0	1	0	1
YAL009W	SPO7	R-III	class_IV	IG_64_genes-complement	divergent						no summit upstream				22.2312	none	0	0	0	0	1	0
YAL010C	MDM10	R-III	class_IV	IG_64_genes-complement	divergent						no summit upstream				22.2312	none	0	0	0	0	1	1
YAL011W	SWC3	R-III	class_IV	IG_62_genes-complement	tandem						no summit upstream				19.1204	none	0	0	0	1	0	1
YAL012W	CYS3	R-II	class_IV	IG_61_genes-complement	tandem						no summit upstream				28.4374	none	0	0	0	1	0	1
YAL013W	DEP1	R-II	class_IV	IG_60_genes-complement	divergent						no summit upstream				35.3396	none	0	0	0	0	1	0
YAL014C	SYN8	R-III	class_IV	IG_60_genes-complement	divergent						no summit upstream				35.3396	none	1	0	0	1	0	1
YAL015C	NTG1	R-III	class_IV	IG_59_genes-complement	tandem						no summit upstream				14.634	none	1	0	0	1	0	1
YAL016C-B		R-III	class_III	IG_57_genes-complement	tandem						no summit upstream				37.5198	none	1	0	0	0	0	1
YAL017W	PSK1	RØ	class_III	IG_55_genes-complement	divergent						no summit upstream				28.1163	none	1	0	0	0	0	1
YAL018C	LDS1	R-III	class_IV	IG_55_genes-complement	divergent						no summit upstream				28.1163	none	0	0	0	0	1	0
YAL019W	FUN30	R-II	class_IV	IG_53_genes-complement	tandem						no summit upstream				22.7244	none	0	0	0	1	0	1
YAL021C	CCR4	R-III	class_III	IG_52_genes-complement	tandem						no summit upstream				27.6042	none	0	0	0	1	0	1
YAL022C	FUN26	R-III	class_IV	IG_51_genes-complement	tandem						no summit upstream				23.7494	none	0	0	0	1	0	1
YAL023C	PMT2	R-II	class_IV	IG_50_genes-complement	tandem						no summit upstream				31.968	none	0	0	0	1	0	1
YAL024C	LTE1	R-III	class_IV	IG_49_genes-complement	tandem						no summit upstream				25.9057	none	0	0	0	1	0	1
YAL025C	MAK16	R-I	class_IV	IG_48_genes-complement	tandem						no summit upstream				24.89	none	0	0	0	1	0	1
YAL026C	DRS2	R-III	class_IV	IG_47_genes-complement	tandem						no summit upstream				22.9963	none	0	0	0	0	1	0
YAL027W	SAW1	R-III	class_III	IG_46_genes-complement	tandem						no summit upstream				24.789	none	0	0	0	0	1	0
YAL028W	FRT2	R-III	class_IV	IG_45_genes-complement	divergent	chr01	92688	92689	6d_IP_vs_untagged_cer_reps_peak_15	-174	strong	3.60562	227.565	2253	67.8755	any	0	0	0	0	1	0
YAL029C	MYO4	R-III	class_IV	IG_45_genes-complement	divergent	chr01	92688	92689	6d_IP_vs_untagged_cer_reps_peak_15	-369	strong	3.60562	227.565	2253	67.8755	any	0	0	0	1	0	1
YAL030W	SNC1	R-III	class_III	IG_43_genes-complement	divergent						no summit upstream				26.8654	none	1	0	0	1	0	1
YAL031C	GIP4	R-III	class_IV	IG_43_genes-complement	divergent						no summit upstream				26.8654	none	1	0	0	0	0	1
YAL031W-A		R-III	class_IV	IG_42_genes-complement	divergent						no summit upstream				27.5498	none	1	0	0	1	0	1
YAL032C	PRP45	R-III	class_III	IG_42_genes-complement	divergent						no summit upstream				27.5498	none	1	0	0	1	0	1
YAL033W	POP5	R-III	class_IV	IG_40_genes-complement	divergent	chr01	82021	82022	6d_IP_vs_untagged_cer_reps_peak_14	-673	mild	1.49004	12.9534	118	31.4283	any	1	0	0	1	0	1
YAL034C	FUN19	R-III	class_III	IG_40_genes-complement	divergent	chr01	82021	82022	6d_IP_vs_untagged_cer_reps_peak_14	-19	mild	1.49004	12.9534	118	31.4283	any	1	0	0	1	0	1
YAL035W	FUN12	R-II	class_III	IG_37_genes-complement	divergent						no summit upstream				35.433	none	1	0	0	1	0	1
YAL036C	RBG1	R-II	class_IV	IG_37_genes-complement	divergent						no summit upstream				35.433	none	0	0	0	1	0	1
YAL037C-A		R-III	class_IV	IG_35_genes-complement	divergent						no summit upstream				20.7346	none	1	0	0	1	0	1
YAL037C-B		R-II	class_III	IG_34_genes-complement	tandem						no summit upstream				18.0966	none	1	1	0	1	0	1
YAL037W		R-III	class_IV	IG_35_genes-complement	divergent						no summit upstream				20.7346	none	0	0	0	1	0	1
YAL038W	CDC19	R-II	class_III	IG_33_genes-complement	divergent	chr01	71062	71063	6d_IP_vs_untagged_cer_reps_peak_13	-693	mild	2.32928	73.1448	715	54.4507	any	1	1	0	1	0	1
YAL038W	CDC19	R-II	class_III	IG_33_genes-complement	divergent	chr01	69792	69793	6d_IP_vs_untagged_cer_reps_peak_12	-1963	strong	3.61833	229.244	2270	54.4507	any	1	1	0	1	0	1
YAL039C	CYC3	R-II	class_III	IG_33_genes-complement	divergent	chr01	69792	69793	6d_IP_vs_untagged_cer_reps_peak_12	-215	strong	3.61833	229.244	2270	54.4507	any	1	0	0	1	0	1
YAL039C	CYC3	R-II	class_III	IG_33_genes-complement	divergent	chr01	71062	71063	6d_IP_vs_untagged_cer_reps_peak_13	-1485	mild	2.32928	73.1448	715	54.4507	any	1	0	0	1	0	1
YAL040C	CLN3	R-II	class_IV	IG_32_genes-complement	tandem	chr01	68380	68381	6d_IP_vs_untagged_cer_reps_peak_11	-860	strong	2.71075	112.62	1108	45.5346	any	1	0	0	1	0	1
YAL041W	CDC24	R-II	class_IV	IG_30_genes-complement	tandem	chr01	62633	62634	6d_IP_vs_untagged_cer_reps_peak_10	-146	mild	1.60766	18.7545	175	45.3615	any	1	0	0	1	0	1
YAL043C	PTA1	R-III	class_IV	IG_29_genes-complement	tandem						no summit upstream				36.3373	none	1	0	0	1	0	1
YAL044C	GCV3	R-III	class_III	IG_28_genes-complement	tandem						no summit upstream				30.5146	none	1	0	0	1	0	1
YAL046C	BOL3	R-III	class_IV	IG_26_genes-complement	tandem						no summit upstream				22.874	none	0	0	0	0	1	0
YAL047C	SPC72	R-III	class_IV	IG_25_genes-complement	tandem						no summit upstream				16.4988	none	0	0	0	0	1	0
YAL049C	AIM2	R-III	class_III	IG_23_genes-complement	tandem						no summit upstream				38.1762	none	1	0	0	1	0	1
YAL051W	OAF1	R-II	class_III	IG_21_genes-complement	tandem	chr01	48354	48355	6d_IP_vs_untagged_cer_reps_peak_9	-183	strong	2.42465	82.5955	809	65.1372	any	1	0	0	1	0	1
YAL053W	FLC2	R-I	class_III	IG_20_genes-complement	divergent	chr01	45383	45384	6d_IP_vs_untagged_cer_reps_peak_8	-411	strong	6.00093	644.962	6419	117.938	any	1	0	0	1	0	1
YAL054C	ACS1	RØ	class_I	IG_20_genes-complement	divergent	chr01	45383	45384	6d_IP_vs_untagged_cer_reps_peak_8	-308	strong	6.00093	644.962	6419	117.938	any	1	1	1	0	0	1
YAL055W	PEX22	R-III	class_III	IG_18_genes-complement	tandem						no summit upstream				34.4167	none	1	0	0	0	0	1
YAL056C-A		R-III	class_IV	IG_17_genes-complement	divergent						no summit upstream				34.7251	none	0	0	0	0	1	0
YAL056W	GPB2	R-II	class_III	IG_17_genes-complement	divergent						no summit upstream				34.7251	none	1	0	0	1	0	1
YAL058W	CNE1	R-III	class_IV	IG_16_genes-complement	tandem						no summit upstream				18.8583	none	0	0	0	0	1	0
YAL060W	BDH1	R-III	class_IV	IG_14_genes-complement	tandem						no summit upstream				53.8291	none	1	0	0	1	0	1
YAL061W	BDH2	R-I	class_III	IG_13_genes-complement	tandem	chr01	33046	33047	6d_IP_vs_untagged_cer_reps_peak_7	-314	strong	3.5929	225.891	2237	80.6514	any	1	1	0	0	0	1
YAL062W	GDH3	RØ	class_I	IG_12_genes-complement	divergent	chr01	28733	28734	6d_IP_vs_untagged_cer_reps_peak_5	-2780	mild	1.57746	17.1135	159	42.9334	any	1	1	1	1	0	1
YAL062W	GDH3	RØ	class_I	IG_12_genes-complement	divergent	chr01	29899	29900	6d_IP_vs_untagged_cer_reps_peak_6	-1614	strong	2.6281	103.627	1018	42.9334	any	1	1	1	1	0	1
YAL063C	FLO9	R-III	class_III	IG_12_genes-complement	divergent	chr01	28733	28734	6d_IP_vs_untagged_cer_reps_peak_5	-741	mild	1.57746	17.1135	159	42.9334	any	0	0	0	0	1	0
YAL063C	FLO9	R-III	class_III	IG_12_genes-complement	divergent	chr01	29899	29900	6d_IP_vs_untagged_cer_reps_peak_6	-1907	strong	2.6281	103.627	1018	42.9334	any	0	0	0	0	1	0
YAL063C-A		R-III	class_IV	IG_11_genes-complement	tandem						no summit upstream				28.016	none	0	0	0	0	1	0
YAL064C-A	TDA8	R-II	class_III	IG_9_genes-complement	divergent	chr01	20934	20935	6d_IP_vs_untagged_cer_reps_peak_4	-7191	strong	4.58308	451.202	4484	33.5823	any	0	0	0	1	0	1
YAL064C-A	TDA8	R-II	class_III	IG_9_genes-complement	divergent	chr01	14833	14834	6d_IP_vs_untagged_cer_reps_peak_3	-1090	mild	1.83337	44.9526	435	33.5823	any	0	0	0	1	0	1
YAL064W		R-III	class_IV	IG_9_genes-complement	divergent	chr01	14833	14834	6d_IP_vs_untagged_cer_reps_peak_3	-6676	mild	1.83337	44.9526	435	33.5823	any	0	0	0	0	1	0
YAL064W		R-III	class_IV	IG_9_genes-complement	divergent	chr01	20934	20935	6d_IP_vs_untagged_cer_reps_peak_4	-575	strong	4.58308	451.202	4484	33.5823	any	0	0	0	0	1	0
YAL064W-B		R-III	class_III	IG_7_genes-complement	divergent						no summit upstream				24.177	none	0	0	0	0	1	0
YAL065C		R-III	class_III	IG_7_genes-complement	divergent						no summit upstream				24.177	none	0	0	0	0	1	0
YAL066W		R-III	class_IV	IG_5_genes-complement	divergent						no summit upstream				22.4144	none	0	0	0	0	1	0
YAL067C	SEO1	R-III	class_IV	IG_5_genes-complement	divergent						no summit upstream				22.4144	none	0	0	0	0	1	0
YAL067W-A		R-III	class_IV	IG_3_genes-complement	divergent	chr01	2459	2460	6d_IP_vs_untagged_cer_reps_peak_2	-21	mild	1.4042	9.50706	84	32.0939	any	0	0	0	0	1	0
YAL068C	PAU8	R-III	class_IV	IG_3_genes-complement	divergent	chr01	2459	2460	6d_IP_vs_untagged_cer_reps_peak_2	-290	mild	1.4042	9.50706	84	32.0939	any	0	0	0	0	1	0
YAR002C-A	ERP1	R-II	class_III	IG_73_genes-complement	divergent						no summit upstream				27.6458	none	0	0	0	1	0	1
YAR002W	NUP60	R-II	class_IV	IG_71_genes-complement	divergent	chr01	151220	151221	6d_IP_vs_untagged_cer_reps_peak_17	-995	mild	1.59654	18.1313	169	34.9741	any	0	0	0	1	0	1
YAR003W	SWD1	R-III	class_IV	IG_73_genes-complement	divergent						no summit upstream				27.6458	none	0	0	0	1	0	1
YAR007C	RFA1	R-III	class_III	IG_75_genes-complement	divergent						no summit upstream				34.5929	none	0	0	0	1	0	1
YAR008W	SEN34	R-III	class_IV	IG_75_genes-complement	divergent						no summit upstream				34.5929	none	0	0	0	1	0	1
YAR014C	BUD14	R-II	class_IV	IG_77_genes-complement	divergent						no summit upstream				33.4487	none	0	0	0	1	0	1
YAR015W	ADE1	R-III	class_IV	IG_77_genes-complement	divergent						no summit upstream				33.4487	none	1	0	0	1	0	1
YAR018C	KIN3	R-III	class_IV	IG_79_genes-complement	tandem						no summit upstream				23.4861	none	1	0	0	1	0	1
YAR020C	PAU7	R-III	class_III	IG_81_genes-complement	tandem						no summit upstream				22.4076	none	0	0	0	0	1	0
YAR023C		R-III	class_IV	IG_82_genes-complement	divergent	chr01	181068	181069	6d_IP_vs_untagged_cer_reps_peak_18	-1192	mild	1.50117	13.4896	123	26.0517	any	1	0	0	0	0	1
YAR027W	UIP3	R-III	class_IV	IG_82_genes-complement	divergent	chr01	181068	181069	6d_IP_vs_untagged_cer_reps_peak_18	-2621	mild	1.50117	13.4896	123	26.0517	any	1	0	0	0	0	1
YAR028W		R-III	class_IV	IG_83_genes-complement	tandem						no summit upstream				23.2083	none	0	0	0	0	1	0
YAR029W		R-III	class_IV	IG_84_genes-complement	tandem						no summit upstream				23.2966	none	0	0	0	0	1	0
YAR033W	MST28	R-III	class_IV	IG_85_genes-complement	tandem						no summit upstream				17.8903	none	0	0	0	0	1	0
YAR035C-A		R-III	class_IV	IG_88_genes-complement	divergent	chr01	192471	192472	6d_IP_vs_untagged_cer_reps_peak_20	41	mild	1.48686	12.7769	116	48.2706	any	1	0	0	0	0	1
YAR035W	YAT1	R-III	class_III	IG_86_genes-complement	tandem	chr01	189903	189904	6d_IP_vs_untagged_cer_reps_peak_19	-241	strong	4.21756	320.769	3183	52.3178	any	1	0	0	0	0	1
YAR042W	SWH1	R-II	class_III	IG_88_genes-complement	divergent	chr01	192471	192472	6d_IP_vs_untagged_cer_reps_peak_20	-86	mild	1.48686	12.7769	116	48.2706	any	0	0	0	1	0	1
YAR047C		R-III	class_IV	IG_90_genes-complement	divergent						no summit upstream				8.59691	none	0	0	0	0	1	0
YAR050W	FLO1	R-III	class_III	IG_90_genes-complement	divergent						no summit upstream				8.59691	none	0	0	0	0	1	0
YAR053W		R-III	class_IV	IG_91_genes-complement	tandem						no summit upstream				9.64133	none	0	0	0	0	1	0
YAR060C		R-III	class_IV	IG_93_genes-complement	divergent						no summit upstream				17.6844	none	0	0	0	0	1	0
YAR064W		R-III	class_II	IG_93_genes-complement	divergent						no summit upstream				17.6844	none	0	0	1	0	1	0
YAR066W		R-II	class_IV	IG_94_genes-complement	tandem						no summit upstream				22.4547	none	0	0	0	0	1	0
YAR068W		R-II	class_IV	IG_95_genes-complement	tandem						no summit upstream				16.9935	none	0	0	0	1	0	1
YAR069C		R-III	class_IV	IG_97_genes-complement	tandem						no summit upstream				23.3279	none	0	0	0	0	1	0
YAR070C		R-III	class_IV	IG_98_genes-complement	divergent						no summit upstream				24.9967	none	0	0	0	1	0	1
YAR071W	PHO11	R-II	class_IV	IG_98_genes-complement	divergent						no summit upstream				24.9967	none	0	0	0	1	0	1
YAR073W	IMD1	R-III	class_IV	IG_99_genes-complement	tandem						no summit upstream				1.27985	none	0	0	0	0	1	0
YBL001C	ECM15	R-III	class_III	IG_210_genes-complement	tandem	chr02	238353	238354	6d_IP_vs_untagged_cer_reps_peak_64	-851	mild	1.50118	13.4295	122	38.0592	any	1	0	0	1	0	1
YBL001C	ECM15	R-III	class_III	IG_210_genes-complement	tandem	chr02	237582	237583	6d_IP_vs_untagged_cer_reps_peak_63	-80	mild	1.63945	20.4621	192	38.0592	any	1	0	0	1	0	1
YBL002W	HTB2	R-II	class_IV	IG_208_genes-complement	divergent	chr02	236156	236157	6d_IP_vs_untagged_cer_reps_peak_62	-302	strong	2.7791	120.548	1187	58.1646	any	1	0	0	1	0	1
YBL003C	HTA2	R-III	class_IV	IG_208_genes-complement	divergent	chr02	236156	236157	6d_IP_vs_untagged_cer_reps_peak_62	-328	strong	2.7791	120.548	1187	58.1646	any	1	0	0	1	0	1
YBL004W	UTP20	R-II	class_IV	IG_206_genes-complement	tandem	chr02	227032	227033	6d_IP_vs_untagged_cer_reps_peak_61	-511	mild	1.57428	17.1135	159	20.5276	any	0	0	0	1	0	1
YBL005W	PDR-III	R-II	class_IV	IG_205_genes-complement	divergent	chr02	217240	217241	6d_IP_vs_untagged_cer_reps_peak_60	-157	mild	1.99867	44.8236	433	51.4896	any	1	0	0	1	0	1
YBL006C	LDB7	R-II	class_IV	IG_205_genes-complement	divergent	chr02	217240	217241	6d_IP_vs_untagged_cer_reps_peak_60	-91	mild	1.99867	44.8236	433	51.4896	any	1	0	0	1	0	1
YBL007C	SLA1	R-II	class_III	IG_204_genes-complement	tandem	chr02	216387	216388	6d_IP_vs_untagged_cer_reps_peak_59	31	mild	1.69667	23.8388	225	46.0179	any	1	0	0	1	0	1
YBL008W	HIR-I	R-III	class_III	IG_202_genes-complement	tandem						no summit upstream				23.9663	none	0	0	0	0	1	0
YBL008W-A		R-III	class_IV	IG_201_genes-complement	tandem						no summit upstream				19.8586	none	0	0	0	1	0	1
YBL009W	ALK2	R-III	class_IV	IG_200_genes-complement	divergent						no summit upstream				28.2069	none	0	0	0	1	0	1
YBL010C		R-III	class_IV	IG_200_genes-complement	divergent						no summit upstream				28.2069	none	0	0	0	1	0	1
YBL013W	FMT1	R-III	class_IV	IG_197_genes-complement	divergent						no summit upstream				43.8408	none	0	0	0	0	1	0
YBL014C	RRN6	R-II	class_IV	IG_197_genes-complement	divergent						no summit upstream				43.8408	none	1	0	0	1	0	1
YBL015W	ACH1	R-III	class_IV	IG_195_genes-complement	tandem						no summit upstream				34.1543	none	1	0	0	0	0	1
YBL016W	FUS3	R-II	class_IV	IG_194_genes-complement	divergent	chr02	191907	191908	6d_IP_vs_untagged_cer_reps_peak_55	-501	mild	1.50435	13.6705	125	36.0064	any	1	0	0	1	0	1
YBL017C	PEP1	R-II	class_IV	IG_194_genes-complement	divergent	chr02	191907	191908	6d_IP_vs_untagged_cer_reps_peak_55	-253	mild	1.50435	13.6705	125	36.0064	any	1	0	0	1	0	1
YBL018C	POP8	R-III	class_IV	IG_193_genes-complement	tandem						no summit upstream				29.9205	none	1	0	0	1	0	1
YBL019W	APN2	R-III	class_IV	IG_191_genes-complement	tandem						no summit upstream				16.6794	none	1	0	0	1	0	1
YBL020W	RFT1	R-III	class_IV	IG_190_genes-complement	divergent						no summit upstream				33.0242	none	0	0	0	1	0	1
YBL021C	HAP3	R-III	class_IV	IG_190_genes-complement	divergent						no summit upstream				33.0242	none	0	0	0	1	0	1
YBL022C	PIM1	R-III	class_III	IG_189_genes-complement	tandem						no summit upstream				30.2976	none	1	0	0	1	0	1
YBL023C	MCM2	R-III	class_IV	IG_188_genes-complement	tandem						no summit upstream				27.7422	none	0	0	0	1	0	1
YBL024W	NCL1	R-II	class_IV	IG_186_genes-complement	tandem						no summit upstream				22.9229	none	0	0	0	1	0	1
YBL025W	RRN10	R-III	class_IV	IG_185_genes-complement	tandem						no summit upstream				29.1462	none	0	0	0	1	0	1
YBL026W	LSM2	R-II	class_IV	IG_184_genes-complement	tandem						no summit upstream				29.0379	none	1	0	0	1	0	1
YBL027W	RPL19B	R-II	class_III	IG_183_genes-complement	divergent	chr02	168146	168147	6d_IP_vs_untagged_cer_reps_peak_54	-245	strong	2.69485	110.886	1091	60.2648	any	1	0	0	1	0	1
YBL028C		R-II	class_IV	IG_183_genes-complement	divergent	chr02	168146	168147	6d_IP_vs_untagged_cer_reps_peak_54	-275	strong	2.69485	110.886	1091	60.2648	any	1	0	0	1	0	1
YBL029C-A		R-III	class_II	IG_181_genes-complement	divergent	chr02	165205	165206	6d_IP_vs_untagged_cer_reps_peak_52	-361	strong	4.85652	428.699	4260	62.5715	any	1	0	1	1	0	1
YBL029W		R-III	class_IV	IG_181_genes-complement	divergent	chr02	165205	165206	6d_IP_vs_untagged_cer_reps_peak_52	-882	strong	4.85652	428.699	4260	62.5715	any	1	0	0	1	0	1
YBL030C	PET9	R-II	class_III	IG_180_genes-complement	tandem						no summit upstream				66.5116	none	1	0	0	1	0	1
YBL031W	SHE1	R-III	class_IV	IG_178_genes-complement	tandem						no summit upstream				27.8167	none	1	0	0	1	0	1
YBL032W	HEK2	R-III	class_IV	IG_177_genes-complement	divergent	chr02	159896	159897	6d_IP_vs_untagged_cer_reps_peak_51	-199	strong	3.71211	243.393	2411	77.9814	any	0	0	0	1	0	1
YBL033C	RIB1	R-II	class_I	IG_177_genes-complement	divergent	chr02	159896	159897	6d_IP_vs_untagged_cer_reps_peak_51	-176	strong	3.71211	243.393	2411	77.9814	any	1	0	1	1	0	1
YBL034C	STU1	R-III	class_III	IG_176_genes-complement	tandem						no summit upstream				57.4032	none	0	0	0	0	1	0
YBL035C	POL12	R-III	class_IV	IG_175_genes-complement	tandem						no summit upstream				37.793	none	0	0	0	1	0	1
YBL036C		R-II	class_III	IG_174_genes-complement	tandem						no summit upstream				34.5365	none	0	0	0	1	0	1
YBL037W	APL3	R-III	class_IV	IG_172_genes-complement	tandem	chr02	147001	147002	6d_IP_vs_untagged_cer_reps_peak_50	-119	mild	1.4662	11.9113	107	40.3488	any	1	0	0	1	0	1
YBL038W	MRPL16	R-II	class_IV	IG_171_genes-complement	divergent	chr02	146004	146005	6d_IP_vs_untagged_cer_reps_peak_49	-116	mild	2.07496	50.7418	492	48.7476	any	1	0	0	1	0	1
YBL039C	URA7	R-II	class_IV	IG_171_genes-complement	divergent	chr02	146004	146005	6d_IP_vs_untagged_cer_reps_peak_49	-222	mild	2.07496	50.7418	492	48.7476	any	0	0	0	1	0	1
YBL039W-B		R-III	class_IV	IG_169_genes-complement	divergent						no summit upstream				30.947	none	1	0	0	1	0	1
YBL040C	ERD2	R-III	class_IV	IG_169_genes-complement	divergent						no summit upstream				30.947	none	1	0	0	1	0	1
YBL041W	PRE7	R-III	class_IV	IG_167_genes-complement	divergent	chr02	140627	140628	6d_IP_vs_untagged_cer_reps_peak_48	-584	strong	3.11288	161.062	1591	63.0427	any	1	0	0	1	0	1
YBL042C	FUI1	R-II	class_IV	IG_167_genes-complement	divergent	chr02	140627	140628	6d_IP_vs_untagged_cer_reps_peak_48	-309	strong	3.11288	161.062	1591	63.0427	any	1	0	0	1	0	1
YBL043W	ECM13	R-III	class_IV	IG_165_genes-complement	tandem						no summit upstream				44.1679	none	1	0	0	0	0	1
YBL044W		R-III	class_II	IG_164_genes-complement	divergent						no summit upstream				62.9291	none	0	0	1	0	1	0
YBL045C	COR-I	R-III	class_III	IG_164_genes-complement	divergent						no summit upstream				62.9291	none	1	0	0	1	0	1
YBL046W	PSY4	R-III	class_IV	IG_162_genes-complement	divergent						no summit upstream				38.603	none	1	0	0	1	0	1
YBL047C	EDE1	R-II	class_III	IG_162_genes-complement	divergent						no summit upstream				38.603	none	1	0	0	1	0	1
YBL048W	RRT1	R-II	class_III	IG_160_genes-complement	tandem						no summit upstream				44.7476	none	1	0	0	1	0	1
YBL049W	MOH1	R-II	class_I	IG_159_genes-complement	tandem	chr02	126450	126451	6d_IP_vs_untagged_cer_reps_peak_46	-275	strong	3.05248	153.207	1512	70.7943	any	1	0	1	0	0	1
YBL050W	SEC17	R-III	class_III	IG_158_genes-complement	divergent						no summit upstream				36.4943	none	1	0	0	1	0	1
YBL051C	PIN4	R-II	class_III	IG_158_genes-complement	divergent						no summit upstream				36.4943	none	1	0	0	1	0	1
YBL052C	SAS3	R-III	class_III	IG_157_genes-complement	tandem						no summit upstream				26.9955	none	0	0	0	1	0	1
YBL053W		R-II	class_III	IG_156_genes-complement	tandem						no summit upstream				15.1669	none	1	0	0	1	0	1
YBL054W	TOD6	R-I	class_III	IG_155_genes-complement	divergent	chr02	117246	117247	6d_IP_vs_untagged_cer_reps_peak_45	-231	mild	1.55044	15.927	147	41.5555	any	0	0	0	1	0	1
YBL055C		R-III	class_IV	IG_155_genes-complement	divergent	chr02	117246	117247	6d_IP_vs_untagged_cer_reps_peak_45	-373	mild	1.55044	15.927	147	41.5555	any	1	0	0	1	0	1
YBL056W	PTC3	R-II	class_III	IG_153_genes-complement	divergent						no summit upstream				31.6558	none	1	0	0	1	0	1
YBL057C	PTH2	R-III	class_IV	IG_153_genes-complement	divergent						no summit upstream				31.6558	none	1	0	0	1	0	1
YBL058W	SHP1	R-II	class_III	IG_151_genes-complement	tandem						no summit upstream				30.5642	none	1	0	0	1	0	1
YBL059C-A	CMC2	R-III	class_III	IG_150_genes-complement	divergent						no summit upstream				35.9912	none	1	0	0	1	0	1
YBL059W		R-III	class_IV	IG_150_genes-complement	divergent						no summit upstream				35.9912	none	1	0	0	1	0	1
YBL060W	YEL1	R-II	class_IV	IG_148_genes-complement	divergent						no summit upstream				35.8283	none	0	0	0	1	0	1
YBL061C	SKT5	R-II	class_IV	IG_148_genes-complement	divergent						no summit upstream				35.8283	none	0	0	0	1	0	1
YBL062W		R-II	class_IV	IG_147_genes-complement	tandem						no summit upstream				17.2313	none	0	0	0	1	0	1
YBL063W	KIP1	R-III	class_IV	IG_146_genes-complement	divergent	chr02	101201	101202	6d_IP_vs_untagged_cer_reps_peak_44	-661	strong	2.43259	83.3706	817	45.086	any	0	0	0	0	1	0
YBL064C	PRX1	R-III	class_III	IG_146_genes-complement	divergent	chr02	101201	101202	6d_IP_vs_untagged_cer_reps_peak_44	0	strong	2.43259	83.3706	817	45.086	any	1	0	0	0	0	1
YBL067C	UBP13	R-II	class_III	IG_144_genes-complement	tandem	chr02	96358	96359	6d_IP_vs_untagged_cer_reps_peak_42	-386	strong	2.92215	137.457	1355	62.8719	any	1	0	0	1	0	1
YBL071C		R-II	class_III	IG_141_genes-complement	tandem						no summit upstream				45.0878	none	0	0	0	1	0	1
YBL071C-B		R-II	class_IV	IG_140_genes-complement	divergent	chr02	89725	89726	6d_IP_vs_untagged_cer_reps_peak_41	-169	mild	2.23073	64.1469	625	59.7782	any	1	0	0	1	0	1
YBL071W-A	KTI11	R-I	class_III	IG_140_genes-complement	divergent	chr02	89725	89726	6d_IP_vs_untagged_cer_reps_peak_41	-216	mild	2.23073	64.1469	625	59.7782	any	0	0	0	1	0	1
YBL072C	RPS8A	R-II	class_III	IG_139_genes-complement	tandem						no summit upstream				29.848	none	1	0	0	1	0	1
YBL075C	SSA3	RØ	class_III	IG_137_genes-complement	tandem						no summit upstream				73.3887	none	1	1	0	1	0	1
YBL076C	ILS1	R-II	class_IV	IG_136_genes-complement	tandem	chr02	84411	84412	6d_IP_vs_untagged_cer_reps_peak_39	-132	strong	2.48028	88.0789	864	74.9314	any	1	0	0	1	0	1
YBL077W		R-II	class_III	IG_135_genes-complement	divergent						no summit upstream				42.7964	none	0	0	0	1	0	1
YBL078C	ATG8	RØ	class_III	IG_135_genes-complement	divergent						no summit upstream				42.7964	none	1	0	0	1	0	1
YBL079W	NUP170	R-II	class_III	IG_133_genes-complement	divergent	chr02	75000	75001	6d_IP_vs_untagged_cer_reps_peak_37	-184	mild	1.62991	20.029	187	40.0721	any	1	0	0	1	0	1
YBL080C	PET112	R-III	class_IV	IG_133_genes-complement	divergent	chr02	75000	75001	6d_IP_vs_untagged_cer_reps_peak_37	-270	mild	1.62991	20.029	187	40.0721	any	0	0	0	1	0	1
YBL081W		R-II	class_IV	IG_131_genes-complement	divergent						no summit upstream				21.9342	none	0	0	0	1	0	1
YBL082C	ALG3	R-III	class_IV	IG_131_genes-complement	divergent						no summit upstream				21.9342	none	0	0	0	0	1	0
YBL084C	CDC27	R-II	class_III	IG_130_genes-complement	tandem						no summit upstream				30.1161	none	1	0	0	1	0	1
YBL085W	BOI1	R-III	class_IV	IG_128_genes-complement	divergent	chr02	63511	63512	6d_IP_vs_untagged_cer_reps_peak_36	-239	mild	2.05112	48.8407	473	44.147	any	1	0	0	1	0	1
YBL085W	BOI1	R-III	class_IV	IG_128_genes-complement	divergent	chr02	62824	62825	6d_IP_vs_untagged_cer_reps_peak_35	-926	mild	1.50276	13.4896	123	44.147	any	1	0	0	1	0	1
YBL086C		R-III	class_III	IG_128_genes-complement	divergent	chr02	63511	63512	6d_IP_vs_untagged_cer_reps_peak_36	-848	mild	2.05112	48.8407	473	44.147	any	1	0	0	0	0	1
YBL086C		R-III	class_III	IG_128_genes-complement	divergent	chr02	62824	62825	6d_IP_vs_untagged_cer_reps_peak_35	-161	mild	1.50276	13.4896	123	44.147	any	1	0	0	0	0	1
YBL087C	RPL23A	R-II	class_IV	IG_127_genes-complement	tandem	chr02	60991	60992	6d_IP_vs_untagged_cer_reps_peak_34	-219	strong	3.2909	183.889	1818	69.4636	any	1	0	0	1	0	1
YBL088C	TEL1	R-III	class_III	IG_126_genes-complement	tandem						no summit upstream				26.9651	none	0	0	0	1	0	1
YBL089W	AVT5	R-III	class_IV	IG_124_genes-complement	tandem						no summit upstream				25.5875	none	1	0	0	1	0	1
YBL090W	MRP21	R-II	class_IV	IG_123_genes-complement	divergent						no summit upstream				30.2874	none	0	0	0	1	0	1
YBL091C	MAP2	R-III	class_III	IG_123_genes-complement	divergent						no summit upstream				30.2874	none	1	0	0	1	0	1
YBL091C-A	SCS22	R-III	class_IV	IG_122_genes-complement	tandem						no summit upstream				29.2095	none	1	0	0	1	0	1
YBL092W	RPL32	R-I	class_III	IG_120_genes-complement	divergent	chr02	45268	45269	6d_IP_vs_untagged_cer_reps_peak_33	-329	mild	2.17192	58.9737	574	42.9585	any	1	0	0	1	0	1
YBL093C	ROX3	R-I	class_III	IG_120_genes-complement	divergent	chr02	45268	45269	6d_IP_vs_untagged_cer_reps_peak_33	-261	mild	2.17192	58.9737	574	42.9585	any	1	0	0	1	0	1
YBL094C		R-II	class_IV	IG_119_genes-complement	tandem						no summit upstream				26.5991	none	1	0	0	1	0	1
YBL097W	BRN1	R-III	class_IV	IG_117_genes-complement	tandem						no summit upstream				19.9823	none	0	0	0	1	0	1
YBL098W	BNA4	R-III	class_IV	IG_116_genes-complement	tandem						no summit upstream				21.0388	none	0	0	0	0	1	0
YBL100W-C		R-III	class_II	IG_114_genes-complement	divergent						no summit upstream				58.8835	none	1	0	1	0	0	1
YBL101C	ECM21	R-II	class_III	IG_114_genes-complement	divergent						no summit upstream				58.8835	none	1	0	0	0	0	1
YBL102W	SFT2	R-III	class_IV	IG_112_genes-complement	divergent						no summit upstream				32.0842	none	1	0	0	1	0	1
YBL103C	RTG3	R-II	class_III	IG_112_genes-complement	divergent						no summit upstream				32.0842	none	1	0	0	1	0	1
YBL104C	SEA4	R-III	class_III	IG_111_genes-complement	tandem						no summit upstream				20.9663	none	0	0	0	1	0	1
YBL105C	PKC1	R-II	class_III	IG_110_genes-complement	tandem						no summit upstream				27.8418	none	1	0	0	1	0	1
YBL106C	SRO77	R-III	class_IV	IG_109_genes-complement	tandem						no summit upstream				19.9008	none	0	0	0	0	1	0
YBL107C	MIX23	R-II	class_III	IG_108_genes-complement	tandem						no summit upstream				26.9319	none	1	0	0	1	0	1
YBL107W-A		R-III	class_IV	IG_106_genes-complement	tandem						no summit upstream				24.5009	none	0	0	0	1	0	1
YBL108C-A	PAU9	R-III	class_IV	IG_105_genes-complement	divergent						no summit upstream				19.5112	none	0	0	0	0	1	0
YBL108W		R-III	class_IV	IG_105_genes-complement	divergent						no summit upstream				19.5112	none	0	0	0	0	1	0
YBL109W		R-III	class_II	IG_103_genes-complement	divergent	chr02	5624	5625	6d_IP_vs_untagged_cer_reps_peak_26	-69	strong	2.96811	261.248	2589	94.6786	any	0	0	1	0	1	0
YBL111C		R-III	class_IV	IG_103_genes-complement	divergent	chr02	5624	5625	6d_IP_vs_untagged_cer_reps_peak_26	-615	strong	2.96811	261.248	2589	94.6786	any	1	0	0	1	0	1
YBL112C		R-III	class_III	IG_102_genes-complement	tandem						no summit upstream				29.8946	none	1	0	0	1	0	1
YBR001C	NTH2	R-II	class_III	IG_211_genes-complement	tandem	chr02	241671	241672	6d_IP_vs_untagged_cer_reps_peak_65	-289	mild	1.62674	19.814	185	45.1541	any	1	0	0	0	0	1
YBR002C	RER-II	R-II	class_III	IG_212_genes-complement	divergent						no summit upstream				39.8924	none	1	0	0	1	0	1
YBR003W	COQ1	R-III	class_IV	IG_212_genes-complement	divergent						no summit upstream				39.8924	none	1	0	0	1	0	1
YBR004C	GPI18	R-III	class_IV	IG_214_genes-complement	divergent						no summit upstream				35.7588	none	1	0	0	1	0	1
YBR005W	RCR-I	R-II	class_III	IG_214_genes-complement	divergent						no summit upstream				35.7588	none	1	0	0	0	0	1
YBR006W	UGA2	R-III	class_III	IG_215_genes-complement	tandem	chr02	246797	246798	6d_IP_vs_untagged_cer_reps_peak_67	-159	mild	1.47892	12.4273	112	38.21	any	1	0	0	0	0	1
YBR007C	DSF2	R-III	class_IV	IG_217_genes-complement	tandem	chr02	251431	251432	6d_IP_vs_untagged_cer_reps_peak_68	-332	mild	1.43123	10.4244	93	26.6993	any	1	0	0	1	0	1
YBR008C	FLR-I	R-III	class_IV	IG_218_genes-complement	tandem						no summit upstream				30.8663	none	0	0	0	1	0	1
YBR009C	HHF1	R-II	class_III	IG_219_genes-complement	divergent	chr02	256030	256031	6d_IP_vs_untagged_cer_reps_peak_70	-311	strong	2.4167	81.8232	801	53.6332	any	1	0	0	1	0	1
YBR010W	HHT1	R-I	class_III	IG_219_genes-complement	divergent	chr02	256030	256031	6d_IP_vs_untagged_cer_reps_peak_70	-275	strong	2.4167	81.8232	801	53.6332	any	1	0	0	1	0	1
YBR011C	IPP1	R-III	class_IV	IG_221_genes-complement	tandem						no summit upstream				17.8575	none	1	0	0	1	0	1
YBR012C		R-III	class_IV	IG_222_genes-complement	tandem						no summit upstream				15.3174	none	0	0	0	0	1	0
YBR013C		R-III	class_IV	IG_223_genes-complement	tandem						no summit upstream				16.5988	none	0	0	0	0	1	0
YBR014C	GRX7	R-III	class_IV	IG_224_genes-complement	tandem						no summit upstream				22.4206	none	0	0	0	0	1	0
YBR015C	MNN2	R-II	class_III	IG_225_genes-complement	divergent						no summit upstream				32.1915	none	0	0	0	1	0	1
YBR016W		R-II	class_III	IG_225_genes-complement	divergent						no summit upstream				32.1915	none	1	0	0	1	0	1
YBR017C	KAP104	R-II	class_III	IG_227_genes-complement	tandem						no summit upstream				22.1975	none	0	0	0	1	0	1
YBR018C	GAL7	R-III	class_IV	IG_228_genes-complement	tandem	chr02	275697	275698	6d_IP_vs_untagged_cer_reps_peak_74	-110	mild	1.6013	18.5457	173	31.7459	any	0	0	0	0	1	0
YBR019C	GAL10	R-III	class_IV	IG_229_genes-complement	divergent	chr02	278601	278602	6d_IP_vs_untagged_cer_reps_peak_75	-158	mild	1.81111	30.9903	296	38.8803	any	0	0	0	0	1	0
YBR020W	GAL1	R-III	class_IV	IG_229_genes-complement	divergent	chr02	278601	278602	6d_IP_vs_untagged_cer_reps_peak_75	-372	mild	1.81111	30.9903	296	38.8803	any	0	0	0	1	0	1
YBR021W	FUR4	R-II	class_IV	IG_230_genes-complement	tandem	chr02	281120	281121	6d_IP_vs_untagged_cer_reps_peak_76	-213	mild	1.80476	30.7304	293	37.0271	any	1	0	0	1	0	1
YBR022W	POA1	R-III	class_IV	IG_231_genes-complement	tandem						no summit upstream				31.1138	none	1	0	0	1	0	1
YBR023C	CHS3	R-II	class_IV	IG_233_genes-complement	divergent						no summit upstream				24.6771	none	0	0	0	1	0	1
YBR024W	SCO2	R-III	class_IV	IG_233_genes-complement	divergent						no summit upstream				24.6771	none	0	0	0	1	0	1
YBR025C	OLA1	R-I	class_IV	IG_235_genes-complement	tandem						no summit upstream				29.1206	none	1	0	0	1	0	1
YBR026C	ETR-I	R-III	class_III	IG_236_genes-complement	tandem						no summit upstream				19.6944	none	1	0	0	0	0	1
YBR027C		R-III	class_IV	IG_237_genes-complement	tandem						no summit upstream				18.9308	none	1	0	0	1	0	1
YBR028C	YPK3	R-II	class_IV	IG_238_genes-complement	tandem						no summit upstream				21.2017	none	1	0	0	0	0	1
YBR029C	CDS1	R-II	class_IV	IG_239_genes-complement	divergent						no summit upstream				29.75	none	0	0	0	1	0	1
YBR030W	RKM3	R-II	class_IV	IG_239_genes-complement	divergent						no summit upstream				29.75	none	0	0	0	1	0	1
YBR031W	RPL4A	R-II	class_IV	IG_240_genes-complement	tandem						no summit upstream				28.1867	none	1	0	0	1	0	1
YBR032W		R-III	class_IV	IG_241_genes-complement	tandem						no summit upstream				31.3802	none	0	0	0	1	0	1
YBR033W	EDS1	R-III	class_IV	IG_242_genes-complement	tandem						no summit upstream				23.2252	none	1	0	0	1	0	1
YBR034C	HMT1	R-I	class_IV	IG_244_genes-complement	tandem	chr02	306079	306080	6d_IP_vs_untagged_cer_reps_peak_78	-80	mild	1.3613	7.73305	66	42.9029	any	1	0	0	1	0	1
YBR035C	PDX3	R-II	class_IV	IG_245_genes-complement	tandem	chr02	307504	307505	6d_IP_vs_untagged_cer_reps_peak_79	-523	mild	1.38832	8.73426	76	28.7234	any	1	0	0	1	0	1
YBR036C	CSG2	R-II	class_III	IG_246_genes-complement	tandem	chr02	310378	310379	6d_IP_vs_untagged_cer_reps_peak_80	-24	mild	1.61243	18.9644	177	46.6241	any	1	0	0	1	0	1
YBR037C	SCO1	R-III	class_IV	IG_247_genes-complement	divergent	chr02	311576	311577	6d_IP_vs_untagged_cer_reps_peak_81	-94	strong	2.5375	94.102	923	58.1555	any	1	0	0	0	0	1
YBR038W	CHS2	R-III	class_IV	IG_247_genes-complement	divergent	chr02	311576	311577	6d_IP_vs_untagged_cer_reps_peak_81	-272	strong	2.5375	94.102	923	58.1555	any	0	0	0	1	0	1
YBR039W	ATP3	R-II	class_III	IG_248_genes-complement	tandem	chr02	315499	315500	6d_IP_vs_untagged_cer_reps_peak_82	-18	mild	1.46938	12.0822	109	28.8524	any	1	0	0	1	0	1
YBR040W	FIG1	R-III	class_IV	IG_249_genes-complement	tandem						no summit upstream				21.2411	none	0	0	0	0	1	0
YBR041W	FAT1	R-III	class_IV	IG_250_genes-complement	tandem						no summit upstream				27.2459	none	1	0	0	1	0	1
YBR042C	CST26	R-III	class_IV	IG_252_genes-complement	tandem						no summit upstream				27.3775	none	0	0	0	1	0	1
YBR043C	QDR-III	R-III	class_III	IG_253_genes-complement	tandem						no summit upstream				35.4271	none	1	0	0	1	0	1
YBR044C	TCM62	R-III	class_IV	IG_254_genes-complement	tandem	chr02	326930	326931	6d_IP_vs_untagged_cer_reps_peak_83	-813	mild	1.73959	26.4565	251	25.8138	any	1	0	0	1	0	1
YBR045C	GIP1	R-III	class_IV	IG_255_genes-complement	tandem						no summit upstream				23.2693	none	0	0	0	0	1	0
YBR046C	ZTA1	R-III	class_III	IG_256_genes-complement	divergent						no summit upstream				36.2849	none	1	0	0	0	0	1
YBR047W	FMP23	R-III	class_IV	IG_256_genes-complement	divergent						no summit upstream				36.2849	none	1	0	0	0	0	1
YBR048W	RPS11B	R-II	class_IV	IG_257_genes-complement	tandem	chr02	332611	332612	6d_IP_vs_untagged_cer_reps_peak_84	-196	mild	1.79189	33.4838	321	46.6549	any	1	0	0	1	0	1
YBR049C	REB1	R-II	class_III	IG_259_genes-complement	tandem	chr02	337016	337017	6d_IP_vs_untagged_cer_reps_peak_85	-99	mild	1.63627	20.4621	192	46.4008	any	0	0	0	1	0	1
YBR052C	RFS1	R-III	class_IV	IG_261_genes-complement	tandem	chr02	339383	339384	6d_IP_vs_untagged_cer_reps_peak_87	30	mild	1.31997	6.27921	52	39.4781	any	1	0	0	0	0	1
YBR053C		R-III	class_IV	IG_262_genes-complement	divergent	chr02	341774	341775	6d_IP_vs_untagged_cer_reps_peak_88	-1004	strong	2.8236	125.49	1236	38.7054	any	1	0	0	0	0	1
YBR054W	YRO2	R-II	class_IV	IG_262_genes-complement	divergent	chr02	341774	341775	6d_IP_vs_untagged_cer_reps_peak_88	-1271	strong	2.8236	125.49	1236	38.7054	any	1	0	0	0	0	1
YBR055C	PRP6	R-III	class_IV	IG_264_genes-complement	divergent	chr02	347593	347594	6d_IP_vs_untagged_cer_reps_peak_89	-267	mild	1.62038	19.3871	181	41.3166	any	1	0	0	1	0	1
YBR056W		R-III	class_IV	IG_264_genes-complement	divergent	chr02	347593	347594	6d_IP_vs_untagged_cer_reps_peak_89	-229	mild	1.62038	19.3871	181	41.3166	any	1	0	0	0	0	1
YBR056W-A		R-III	class_IV	IG_265_genes-complement	tandem	chr02	351007	351008	6d_IP_vs_untagged_cer_reps_peak_90	-218	mild	1.77138	28.4337	271	26.4629	any	1	0	0	0	0	1
YBR057C	MUM2	R-II	class_III	IG_267_genes-complement	tandem						no summit upstream				22.6447	none	1	0	0	1	0	1
YBR058C	UBP14	R-III	class_III	IG_268_genes-complement	tandem						no summit upstream				28.5118	none	0	0	0	1	0	1
YBR058C-A	TSC3	R-III	class_III	IG_269_genes-complement	tandem						no summit upstream				36.1252	none	0	0	0	1	0	1
YBR059C	AKL1	R-III	class_III	IG_270_genes-complement	tandem	chr02	360465	360466	6d_IP_vs_untagged_cer_reps_peak_91	-169	strong	2.59631	100.275	985	60.3634	any	1	0	0	1	0	1
YBR060C	ORC2	R-III	class_IV	IG_271_genes-complement	tandem						no summit upstream				19.4931	none	0	0	0	1	0	1
YBR061C	TRM7	R-III	class_IV	IG_272_genes-complement	tandem						no summit upstream				23.3687	none	0	0	0	1	0	1
YBR062C		R-III	class_IV	IG_273_genes-complement	tandem						no summit upstream				22.1455	none	1	0	0	1	0	1
YBR065C	ECM2	R-II	class_III	IG_275_genes-complement	tandem	chr02	369821	369822	6d_IP_vs_untagged_cer_reps_peak_92	-89	mild	1.73482	26.2137	249	50.456	any	1	0	0	0	0	1
YBR066C	NRG2	R-II	class_IV	IG_276_genes-complement	tandem	chr02	371034	371035	6d_IP_vs_untagged_cer_reps_peak_93	-279	mild	1.43123	10.4244	93	31.7271	any	1	0	0	1	0	1
YBR067C	TIP1	R-III	class_III	IG_277_genes-complement	tandem	chr02	373309	373310	6d_IP_vs_untagged_cer_reps_peak_94	-519	strong	4.19372	317.016	3145	72.3126	any	1	0	0	1	0	1
YBR068C	BAP2	R-I	class_III	IG_278_genes-complement	tandem	chr02	376078	376079	6d_IP_vs_untagged_cer_reps_peak_95	-349	strong	5.84199	613.223	6102	97.3856	any	1	0	0	1	0	1
YBR069C	TAT1	R-II	class_IV	IG_279_genes-complement	tandem	chr02	378858	378859	6d_IP_vs_untagged_cer_reps_peak_96	-320	strong	2.60425	101.109	993	50.9125	any	1	0	0	1	0	1
YBR070C	ALG14	R-II	class_IV	IG_280_genes-complement	divergent						no summit upstream				63.8555	none	1	0	0	1	0	1
YBR071W		R-II	class_III	IG_280_genes-complement	divergent						no summit upstream				63.8555	none	1	0	0	1	0	1
YBR072C-A		R-III	class_II	IG_283_genes-complement	divergent						no summit upstream				54.995	none	1	1	1	0	0	1
YBR072W	HSP26	RØ	class_I	IG_281_genes-complement	tandem	chr02	381503	381504	6d_IP_vs_untagged_cer_reps_peak_97	-464	strong	5.04249	462.119	4593	104.991	any	1	1	1	0	0	1
YBR073W	RDH54	R-III	class_IV	IG_283_genes-complement	divergent						no summit upstream				54.995	none	1	0	0	1	0	1
YBR074W		R-III	class_III	IG_284_genes-complement	tandem						no summit upstream				26.5005	none	0	0	0	1	0	1
YBR076C-A		R-II	class_III	IG_287_genes-complement	tandem						no summit upstream				62.4978	none	1	0	0	1	0	1
YBR076W	ECM8	R-III	class_IV	IG_285_genes-complement	tandem						no summit upstream				20.5579	none	1	0	0	0	0	1
YBR077C	SLM4	R-II	class_I	IG_288_genes-complement	divergent	chr02	392585	392586	6d_IP_vs_untagged_cer_reps_peak_98	-238	strong	2.93327	138.863	1369	64.1321	any	1	0	1	1	0	1
YBR078W	ECM33	R-I	class_III	IG_288_genes-complement	divergent	chr02	392585	392586	6d_IP_vs_untagged_cer_reps_peak_98	-407	strong	2.93327	138.863	1369	64.1321	any	1	0	0	1	0	1
YBR079C	RPG1	R-II	class_IV	IG_290_genes-complement	tandem						no summit upstream				26.2305	none	1	0	0	1	0	1
YBR080C	SEC18	R-III	class_IV	IG_291_genes-complement	tandem						no summit upstream				31.8616	none	1	0	0	1	0	1
YBR081C	SPT7	R-III	class_III	IG_292_genes-complement	tandem	chr02	405937	405938	6d_IP_vs_untagged_cer_reps_peak_100	-596	strong	2.48822	88.8733	871	38.0033	any	0	0	0	1	0	1
YBR082C	UBC4	R-I	class_IV	IG_293_genes-complement	divergent	chr02	407447	407448	6d_IP_vs_untagged_cer_reps_peak_101	-209	mild	2.09404	52.3483	508	42.3858	any	1	0	0	1	0	1
YBR082C	UBC4	R-I	class_IV	IG_293_genes-complement	divergent	chr02	408740	408741	6d_IP_vs_untagged_cer_reps_peak_102	-1502	mild	2.08175	82.7143	810	42.3858	any	1	0	0	1	0	1
YBR083W	TEC1	R-II	class_IV	IG_293_genes-complement	divergent	chr02	407447	407448	6d_IP_vs_untagged_cer_reps_peak_101	-1673	mild	2.09404	52.3483	508	42.3858	any	1	0	0	1	0	1
YBR083W	TEC1	R-II	class_IV	IG_293_genes-complement	divergent	chr02	408740	408741	6d_IP_vs_untagged_cer_reps_peak_102	-380	mild	2.08175	82.7143	810	42.3858	any	1	0	0	1	0	1
YBR084C-A	RPL19A	R-I	class_IV	IG_296_genes-complement	divergent	chr02	415602	415603	6d_IP_vs_untagged_cer_reps_peak_104	-310	strong	2.73936	116.119	1143	54.8033	any	1	0	0	1	0	1
YBR084W	MIS1	R-II	class_IV	IG_294_genes-complement	tandem	chr02	410937	410938	6d_IP_vs_untagged_cer_reps_peak_103	-91	mild	1.45348	11.4054	102	38.8585	any	0	0	0	1	0	1
YBR085C-A		R-I	class_I	IG_298_genes-complement	tandem	chr02	419740	419741	6d_IP_vs_untagged_cer_reps_peak_105	-542	strong	4.97891	450.891	4481	109.172	any	1	1	1	1	0	1
YBR085W	AAC3	R-III	class_IV	IG_296_genes-complement	divergent	chr02	415602	415603	6d_IP_vs_untagged_cer_reps_peak_104	-301	strong	2.73936	116.119	1143	54.8033	any	0	0	0	0	1	0
YBR086C	IST2	R-II	class_III	IG_299_genes-complement	divergent	chr02	423369	423370	6d_IP_vs_untagged_cer_reps_peak_106	-234	mild	1.44236	10.9097	97	38.5634	any	1	0	0	1	0	1
YBR087W	RFC5	R-III	class_IV	IG_299_genes-complement	divergent	chr02	423369	423370	6d_IP_vs_untagged_cer_reps_peak_106	-372	mild	1.44236	10.9097	97	38.5634	any	0	0	0	1	0	1
YBR090C		R-II	class_I	IG_302_genes-complement	tandem						no summit upstream				41.694	none	1	0	1	1	0	1
YBR091C	TIM12	R-II	class_IV	IG_303_genes-complement	tandem						no summit upstream				28.7739	none	0	0	0	1	0	1
YBR092C	PHO3	R-II	class_IV	IG_304_genes-complement	tandem	chr02	429368	429369	6d_IP_vs_untagged_cer_reps_peak_109	-242	mild	1.83178	32.5689	312	44.1751	any	0	0	0	1	0	1
YBR093C	PHO5	R-II	class_IV	IG_305_genes-complement	divergent						no summit upstream				29.8285	none	1	0	0	1	0	1
YBR094W	PBY1	R-III	class_IV	IG_305_genes-complement	divergent						no summit upstream				29.8285	none	1	0	0	1	0	1
YBR095C	RXT2	R-III	class_III	IG_307_genes-complement	divergent						no summit upstream				27.5725	none	0	0	0	1	0	1
YBR096W		R-III	class_IV	IG_307_genes-complement	divergent						no summit upstream				27.5725	none	1	0	0	1	0	1
YBR097W	VPS15	R-III	class_IV	IG_308_genes-complement	tandem						no summit upstream				23.1028	none	0	0	0	0	1	0
YBR098W	MMS4	R-III	class_IV	IG_309_genes-complement	tandem						no summit upstream				31.8798	none	1	0	0	1	0	1
YBR-I01C	FES1	R-II	class_III	IG_311_genes-complement	tandem						no summit upstream				36.022	none	1	0	0	1	0	1
YBR-I02C	EXO84	R-III	class_IV	IG_312_genes-complement	divergent						no summit upstream				29.5541	none	0	0	0	0	1	0
YBR-I03C-A		R-III	class_IV	IG_314_genes-complement	divergent						no summit upstream				33.1085	none	0	0	0	1	0	1
YBR-I03W	SIF2	R-III	class_IV	IG_312_genes-complement	divergent						no summit upstream				29.5541	none	0	0	0	1	0	1
YBR-I04W	YMC2	R-II	class_IV	IG_314_genes-complement	divergent						no summit upstream				33.1085	none	0	0	0	1	0	1
YBR-I05C	VID24	R-I	class_III	IG_316_genes-complement	divergent	chr02	452310	452311	6d_IP_vs_untagged_cer_reps_peak_110	-295	strong	3.92351	274.916	2725	84.512	any	1	0	0	1	0	1
YBR-I06W	PHO88	R-I	class_III	IG_316_genes-complement	divergent	chr02	452310	452311	6d_IP_vs_untagged_cer_reps_peak_110	-304	strong	3.92351	274.916	2725	84.512	any	1	0	0	1	0	1
YBR-I07C	IML3	R-II	class_IV	IG_318_genes-complement	divergent						no summit upstream				33.2042	none	0	0	0	1	0	1
YBR-I08W	AIM3	R-III	class_III	IG_318_genes-complement	divergent						no summit upstream				33.2042	none	0	0	0	0	1	0
YBR-I09C	CMD1	R-II	class_III	IG_320_genes-complement	divergent						no summit upstream				30.1076	none	1	0	0	1	0	1
YBR-I09W-A		R-III	class_IV	IG_320_genes-complement	divergent						no summit upstream				30.1076	none	0	0	0	0	1	0
YBR-I10W	ALG1	R-III	class_IV	IG_321_genes-complement	tandem						no summit upstream				25.2266	none	0	0	0	0	1	0
YBR-I11C	YSA1	R-III	class_III	IG_323_genes-complement	divergent						no summit upstream				36.4538	none	1	0	0	0	0	1
YBR-I11W-A	SUS1	R-III	class_IV	IG_323_genes-complement	divergent						no summit upstream				36.4538	none	1	0	0	1	0	1
YBR-I14W	RAD16	R-II	class_III	IG_325_genes-complement	tandem	chr02	466422	466423	6d_IP_vs_untagged_cer_reps_peak_111	-764	strong	4.42639	358.882	3563	80.0741	any	1	0	0	1	0	1
YBR-I15C	LYS2	R-III	class_III	IG_327_genes-complement	tandem	chr02	474148	474149	6d_IP_vs_untagged_cer_reps_peak_112	-159	strong	2.66955	108.705	1069	61.4994	any	1	0	0	1	0	1
YBR-I17C	TKL2	R-III	class_III	IG_328_genes-complement	divergent	chr02	477312	477313	6d_IP_vs_untagged_cer_reps_peak_113	-837	strong	2.86493	130.505	1286	46.3927	any	1	0	0	1	0	1
YBR-I18W	TEF2	R-I	class_III	IG_328_genes-complement	divergent	chr02	477312	477313	6d_IP_vs_untagged_cer_reps_peak_113	-327	strong	2.86493	130.505	1286	46.3927	any	1	1	0	1	0	1
YBR-I19W	MUD1	R-III	class_III	IG_329_genes-complement	tandem						no summit upstream				45.4026	none	1	0	0	1	0	1
YBR-I20C	CBP6	R-III	class_IV	IG_331_genes-complement	tandem						no summit upstream				30.8011	none	1	0	0	1	0	1
YBR-I21C	GRS1	R-II	class_IV	IG_332_genes-complement	tandem						no summit upstream				29.8703	none	0	0	0	1	0	1
YBR-I22C	MRPL36	R-III	class_IV	IG_333_genes-complement	tandem						no summit upstream				33.7353	none	1	0	0	1	0	1
YBR-I25C	PTC4	R-III	class_IV	IG_335_genes-complement	tandem						no summit upstream				31.36	none	0	0	0	1	0	1
YBR-I26C	TPS1	R-III	class_III	IG_336_genes-complement	divergent						no summit upstream				28.5142	none	1	0	0	1	0	1
YBR-I26W-A	MEO1	R-III	class_IV	IG_336_genes-complement	divergent						no summit upstream				28.5142	none	1	0	0	1	0	1
YBR-I27C	VMA2	R-II	class_III	IG_338_genes-complement	tandem	chr02	493019	493020	6d_IP_vs_untagged_cer_reps_peak_115	-153	mild	1.38196	8.44223	73	39.3629	any	1	0	0	1	0	1
YBR-I28C	ATG14	R-III	class_IV	IG_339_genes-complement	tandem						no summit upstream				23.2258	none	1	0	0	1	0	1
YBR-I29C	OPY1	R-III	class_IV	IG_340_genes-complement	tandem						no summit upstream				28.3898	none	0	0	0	0	1	0
YBR-I30C	SHE3	R-III	class_IV	IG_341_genes-complement	divergent						no summit upstream				28.2942	none	0	0	0	1	0	1
YBR-I31W	CCZ1	R-III	class_IV	IG_341_genes-complement	divergent						no summit upstream				28.2942	none	0	0	0	0	1	0
YBR-I32C	AGP2	R-III	class_III	IG_343_genes-complement	tandem	chr02	501737	501738	6d_IP_vs_untagged_cer_reps_peak_116	-203	mild	1.62832	20.029	187	40.9585	any	1	0	0	0	0	1
YBR-I35W	CKS1	R-III	class_III	IG_344_genes-complement	tandem						no summit upstream				69.0793	none	0	0	0	1	0	1
YBR-I36W	MEC1	R-III	class_IV	IG_345_genes-complement	tandem						no summit upstream				27.3141	none	0	0	0	0	1	0
YBR-I37W		R-III	class_IV	IG_346_genes-complement	tandem	chr02	512830	512831	6d_IP_vs_untagged_cer_reps_peak_118	-143	mild	1.94145	40.3653	389	49.9228	any	0	0	0	1	0	1
YBR-I38C		R-III	class_IV	IG_348_genes-complement	divergent	chr02	515484	515485	6d_IP_vs_untagged_cer_reps_peak_119	-94	mild	1.45984	11.5729	104	41.1226	any	0	0	0	0	1	0
YBR-I39W		R-III	class_III	IG_348_genes-complement	divergent	chr02	515484	515485	6d_IP_vs_untagged_cer_reps_peak_119	-168	mild	1.45984	11.5729	104	41.1226	any	1	0	0	0	0	1
YBR-I40C	IRA1	R-II	class_III	IG_350_genes-complement	tandem						no summit upstream				26.5785	none	1	0	0	1	0	1
YBR-I41C	BMT2	R-II	class_IV	IG_351_genes-complement	divergent						no summit upstream				28.5375	none	0	0	0	1	0	1
YBR-I42W	MAK5	R-II	class_IV	IG_351_genes-complement	divergent						no summit upstream				28.5375	none	0	0	0	1	0	1
YBR-I43C	SUP45	R-II	class_IV	IG_353_genes-complement	tandem						no summit upstream				25.7387	none	1	0	0	1	0	1
YBR-I44C		R-III	class_IV	IG_354_genes-complement	divergent						no summit upstream				25.3087	none	0	0	0	1	0	1
YBR-I45W	ADH5	R-III	class_IV	IG_354_genes-complement	divergent						no summit upstream				25.3087	none	1	0	0	0	0	1
YBR-I46W	MRPS9	R-II	class_IV	IG_355_genes-complement	tandem						no summit upstream				27.6842	none	1	0	0	1	0	1
YBR-I47W	RTC2	R-III	class_III	IG_356_genes-complement	tandem	chr02	536367	536368	6d_IP_vs_untagged_cer_reps_peak_120	-132	mild	1.63309	20.245	190	42.6189	any	1	0	0	0	0	1
YBR-I48W	YSW1	R-III	class_IV	IG_357_genes-complement	tandem	chr02	537551	537552	6d_IP_vs_untagged_cer_reps_peak_121	-228	mild	1.48209	12.6016	114	39.0528	any	0	0	0	0	1	0
YBR-I49W	ARA1	R-III	class_III	IG_358_genes-complement	tandem						no summit upstream				31.7195	none	1	0	0	1	0	1
YBR-I50C	TBS1	R-II	class_III	IG_360_genes-complement	divergent	chr02	544731	544732	6d_IP_vs_untagged_cer_reps_peak_122	-195	strong	4.9503	445.31	4426	98.1411	any	1	0	0	1	0	1
YBR-I51W	APD1	R-III	class_III	IG_360_genes-complement	divergent	chr02	544731	544732	6d_IP_vs_untagged_cer_reps_peak_122	-177	strong	4.9503	445.31	4426	98.1411	any	1	0	0	1	0	1
YBR-I52W	SPP381	R-II	class_IV	IG_361_genes-complement	tandem						no summit upstream				25.4911	none	0	0	0	1	0	1
YBR-I53W	RIB7	R-III	class_IV	IG_362_genes-complement	tandem						no summit upstream				28.6741	none	1	0	0	1	0	1
YBR-I54C	RPB5	R-II	class_IV	IG_364_genes-complement	divergent						no summit upstream				35.7022	none	1	0	0	1	0	1
YBR-I55W	CNS1	R-II	class_IV	IG_364_genes-complement	divergent						no summit upstream				35.7022	none	0	0	0	1	0	1
YBR-I56C	SLI15	R-II	class_IV	IG_366_genes-complement	tandem						no summit upstream				41.2368	none	0	0	0	1	0	1
YBR-I57C	ICS2	R-I	class_I	IG_367_genes-complement	divergent	chr02	555243	555244	6d_IP_vs_untagged_cer_reps_peak_123	-871	strong	3.60562	227.565	2253	69.1366	any	1	0	1	1	0	1
YBR-I58W	AMN1	R-II	class_IV	IG_367_genes-complement	divergent	chr02	555243	555244	6d_IP_vs_untagged_cer_reps_peak_123	-1044	strong	3.60562	227.565	2253	69.1366	any	1	0	0	1	0	1
YBR-I59W	IFA38	R-III	class_IV	IG_368_genes-complement	tandem						no summit upstream				29.1395	none	0	0	0	1	0	1
YBR-I60W	CDC28	R-II	class_IV	IG_369_genes-complement	tandem						no summit upstream				25.3163	none	1	0	0	1	0	1
YBR-I61W	CSH1	R-II	class_IV	IG_370_genes-complement	tandem	chr02	561108	561109	6d_IP_vs_untagged_cer_reps_peak_124	-480	mild	1.64422	20.8992	196	42.4933	any	1	0	0	1	0	1
YBR-I62C	TOS1	R-I	class_III	IG_372_genes-complement	divergent	chr02	565002	565003	6d_IP_vs_untagged_cer_reps_peak_125	-299	strong	2.79181	121.889	1200	59.9958	any	1	0	0	1	0	1
YBR-I62W-A	YSY6	R-I	class_III	IG_372_genes-complement	divergent	chr02	565002	565003	6d_IP_vs_untagged_cer_reps_peak_125	-198	strong	2.79181	121.889	1200	59.9958	any	1	0	0	1	0	1
YBR-I63W	EXO5	R-II	class_III	IG_373_genes-complement	tandem						no summit upstream				61.8401	none	0	0	0	1	0	1
YBR-I64C	ARL1	R-III	class_IV	IG_375_genes-complement	divergent						no summit upstream				25.9259	none	0	0	0	1	0	1
YBR-I65W	UBS1	R-II	class_III	IG_375_genes-complement	divergent						no summit upstream				25.9259	none	0	0	0	1	0	1
YBR-I66C	TYR-I	R-III	class_IV	IG_377_genes-complement	tandem						no summit upstream				26.8489	none	0	0	0	1	0	1
YBR-I67C	POP7	R-III	class_IV	IG_378_genes-complement	divergent						no summit upstream				23.3052	none	0	0	0	1	0	1
YBR-I68W	PEX32	R-III	class_IV	IG_378_genes-complement	divergent						no summit upstream				23.3052	none	1	0	0	0	0	1
YBR-I69C	SSE2	R-II	class_III	IG_380_genes-complement	tandem	chr02	576339	576340	6d_IP_vs_untagged_cer_reps_peak_126	-284	mild	1.53614	15.1575	139	42.9765	any	1	0	0	0	0	1
YBR-I70C	NPL4	R-II	class_III	IG_381_genes-complement	divergent						no summit upstream				29.3771	none	1	0	0	1	0	1
YBR-I71W	SEC66	R-III	class_IV	IG_381_genes-complement	divergent						no summit upstream				29.3771	none	1	0	0	1	0	1
YBR-I72C	SMY2	R-II	class_IV	IG_383_genes-complement	tandem						no summit upstream				31.7641	none	0	0	0	1	0	1
YBR-I73C	UMP1	R-II	class_III	IG_384_genes-complement	tandem						no summit upstream				34.2665	none	1	0	0	1	0	1
YBR-I76W	ECM31	R-III	class_IV	IG_385_genes-complement	tandem						no summit upstream				20.3457	none	0	0	0	1	0	1
YBR-I79C	FZO1	R-II	class_III	IG_388_genes-complement	divergent	chr02	589225	589226	6d_IP_vs_untagged_cer_reps_peak_128	-43	mild	1.7523	27.1908	258	41.9882	any	1	0	0	0	0	1
YBR-I80W	DTR-I	R-III	class_IV	IG_388_genes-complement	divergent	chr02	589225	589226	6d_IP_vs_untagged_cer_reps_peak_128	-418	mild	1.7523	27.1908	258	41.9882	any	0	0	0	1	0	1
YBR-I81C	RPS6B	R-II	class_IV	IG_390_genes-complement	tandem	chr02	593000	593001	6d_IP_vs_untagged_cer_reps_peak_129	-191	strong	2.52637	92.8853	911	44.3126	any	1	0	0	1	0	1
YBR-I82C	SMP1	R-III	class_IV	IG_391_genes-complement	tandem						no summit upstream				29.486	none	0	0	0	0	1	0
YBR-I82C-A		R-III	class_IV	IG_392_genes-complement	divergent	chr02	595785	595786	6d_IP_vs_untagged_cer_reps_peak_130	-186	strong	2.89195	133.733	1318	65.4301	any	0	0	0	0	1	0
YBR-I83W	YPC1	R-III	class_III	IG_392_genes-complement	divergent	chr02	595785	595786	6d_IP_vs_untagged_cer_reps_peak_130	-268	strong	2.89195	133.733	1318	65.4301	any	0	0	0	0	1	0
YBR-I84W		R-III	class_IV	IG_393_genes-complement	tandem						no summit upstream				28.1689	none	0	0	0	0	1	0
YBR-I85C	MBA1	R-III	class_IV	IG_395_genes-complement	divergent						no summit upstream				25.9358	none	0	0	0	0	1	0
YBR-I86W	PCH2	R-III	class_IV	IG_395_genes-complement	divergent						no summit upstream				25.9358	none	0	0	0	0	1	0
YBR-I87W	GDT1	R-II	class_IV	IG_396_genes-complement	tandem						no summit upstream				42.5659	none	0	0	0	1	0	1
YBR-I88C	NTC20	R-III	class_IV	IG_398_genes-complement	divergent	chr02	604387	604388	6d_IP_vs_untagged_cer_reps_peak_132	-217	mild	2.39762	79.9047	782	57.0435	any	0	0	0	1	0	1
YBR-I89W	RPS9B	R-II	class_IV	IG_398_genes-complement	divergent	chr02	604387	604388	6d_IP_vs_untagged_cer_reps_peak_132	-80	mild	2.39762	79.9047	782	57.0435	any	1	0	0	1	0	1
YBR-I90W		R-III	class_IV	IG_399_genes-complement	tandem						no summit upstream				33.2297	none	0	0	0	1	0	1
YBR-I91W-A		R-III	class_IV	IG_400_genes-complement	tandem						no summit upstream				24.397	none	1	0	0	1	0	1
YBR-I92W	RIM2	R-III	class_IV	IG_401_genes-complement	tandem						no summit upstream				23.5972	none	1	0	0	1	0	1
YBR-I93C	MED8	R-III	class_IV	IG_403_genes-complement	divergent						no summit upstream				21.1423	none	1	0	0	1	0	1
YBR-I94W	AIM4	R-III	class_IV	IG_403_genes-complement	divergent						no summit upstream				21.1423	none	0	0	0	1	0	1
YBR-I95C	MSI1	R-III	class_IV	IG_405_genes-complement	tandem						no summit upstream				20.8442	none	1	0	0	1	0	1
YBR-I96C	PGI1	R-III	class_III	IG_406_genes-complement	tandem						no summit upstream				22.9469	none	1	0	0	1	0	1
YBR-I96C-A		R-III	class_IV	IG_407_genes-complement	tandem	chr02	614326	614327	6d_IP_vs_untagged_cer_reps_peak_134	-88	mild	1.63945	20.4621	192	45.4015	any	1	0	0	1	0	1
YBR-I96C-B		R-III	class_IV	IG_408_genes-complement	tandem						no summit upstream				30.6201	none	1	0	0	1	0	1
YBR-I97C		R-II	class_III	IG_409_genes-complement	tandem	chr02	615956	615957	6d_IP_vs_untagged_cer_reps_peak_135	-80	mild	1.42011	9.94947	88	40.4068	any	1	0	0	1	0	1
YBR-I98C	TAF5	R-II	class_III	IG_410_genes-complement	divergent	chr02	618837	618838	6d_IP_vs_untagged_cer_reps_peak_136	-239	mild	1.52342	14.5917	134	42.6007	any	1	0	0	1	0	1
YBR-I99W	KTR4	R-II	class_III	IG_410_genes-complement	divergent	chr02	618837	618838	6d_IP_vs_untagged_cer_reps_peak_136	13	mild	1.52342	14.5917	134	42.6007	any	1	0	0	1	0	1
YBR-II00W	BEM1	R-II	class_III	IG_411_genes-complement	tandem	chr02	620595	620596	6d_IP_vs_untagged_cer_reps_peak_137	-218	mild	1.94145	40.3653	389	53.2557	any	1	0	0	0	0	1
YBR-II00W-A		R-III	class_IV	IG_412_genes-complement	tandem						no summit upstream				37.9644	none	0	0	0	0	1	0
YBR-II01C-A		R-II	class_IV	IG_415_genes-complement	divergent	chr02	625090	625091	6d_IP_vs_untagged_cer_reps_peak_139	-326	mild	2.37219	77.6257	759	53.398	any	1	0	0	1	0	1
YBR-II01W	DER-I	R-III	class_IV	IG_413_genes-complement	tandem	chr02	623372	623373	6d_IP_vs_untagged_cer_reps_peak_138	-69	mild	1.48368	12.6016	114	40.7035	any	1	0	0	0	0	1
YBR-II02W	MCM7	R-III	class_IV	IG_415_genes-complement	divergent	chr02	625090	625091	6d_IP_vs_untagged_cer_reps_peak_139	-639	mild	2.37219	77.6257	759	53.398	any	1	0	0	1	0	1
YBR-II03W	COS111	R-II	class_III	IG_416_genes-complement	tandem	chr02	628554	628555	6d_IP_vs_untagged_cer_reps_peak_140	-535	strong	3.25117	178.724	1767	67.1908	any	1	0	0	1	0	1
YBR-II04C	LDH1	R-III	class_III	IG_418_genes-complement	divergent						no summit upstream				33.9746	none	1	0	0	0	0	1
YBR-II05W	KTR-III	R-III	class_IV	IG_418_genes-complement	divergent						no summit upstream				33.9746	none	0	0	0	1	0	1
YBR-II07W	FTH1	R-II	class_III	IG_419_genes-complement	tandem						no summit upstream				41.2832	none	1	0	0	1	0	1
YBR-II08C	DUR-I,2	R-III	class_IV	IG_421_genes-complement	divergent						no summit upstream				39.6158	none	1	0	0	1	0	1
YBR-II09W		R-III	class_II	IG_421_genes-complement	divergent						no summit upstream				39.6158	none	0	0	1	0	1	0
YBR-II10W	ERV15	R-III	class_IV	IG_422_genes-complement	tandem						no summit upstream				28.5275	none	0	0	0	1	0	1
YBR-II11C	AME1	R-III	class_III	IG_424_genes-complement	divergent	chr02	647452	647453	6d_IP_vs_untagged_cer_reps_peak_142	-221	mild	1.62991	20.029	187	38.6263	any	1	0	0	1	0	1
YBR-II12W	NGR-I	RØ	class_III	IG_424_genes-complement	divergent	chr02	647452	647453	6d_IP_vs_untagged_cer_reps_peak_142	-372	mild	1.62991	20.029	187	38.6263	any	1	0	0	0	0	1
YBR-II13W	MET8	R-III	class_IV	IG_425_genes-complement	tandem	chr02	650082	650083	6d_IP_vs_untagged_cer_reps_peak_143	-216	mild	1.71575	25.014	237	44.7111	any	1	0	0	0	0	1
YBR-II14W	SDS24	RØ	class_III	IG_426_genes-complement	tandem						no summit upstream				39.6847	none	1	0	0	0	0	1
YBR-II15W	HPC2	R-III	class_III	IG_427_genes-complement	tandem						no summit upstream				35.8437	none	0	0	0	1	0	1
YBR-II16C	YBP1	R-III	class_IV	IG_429_genes-complement	divergent						no summit upstream				29.0645	none	0	0	0	1	0	1
YBR-II17W	ATG12	R-III	class_III	IG_429_genes-complement	divergent						no summit upstream				29.0645	none	0	0	0	0	1	0
YBR-II18C	PYC2	R-III	class_IV	IG_431_genes-complement	tandem						no summit upstream				29.8192	none	1	0	0	1	0	1
YBR-II20C		R-II	class_IV	IG_432_genes-complement	tandem						no summit upstream				25.3173	none	0	0	0	0	1	0
YBR-II21C	PDB1	R-III	class_IV	IG_433_genes-complement	divergent						no summit upstream				27.9779	none	1	0	0	1	0	1
YBR-II21W-A		R-III	class_II	IG_433_genes-complement	divergent						no summit upstream				27.9779	none	1	0	1	1	0	1
YBR-II22C	PCS60	R-III	class_III	IG_435_genes-complement	tandem						no summit upstream				51.8972	none	1	0	0	1	0	1
YBR-II26C		R-III	class_III	IG_436_genes-complement	tandem						no summit upstream				21.6467	none	1	0	0	1	0	1
YBR-II27C	MCX1	R-III	class_IV	IG_437_genes-complement	divergent						no summit upstream				20.4523	none	0	0	0	0	1	0
YBR-II28W	SLX1	R-III	class_IV	IG_437_genes-complement	divergent						no summit upstream				20.4523	none	0	0	0	1	0	1
YBR-II29C	ROT2	R-III	class_III	IG_439_genes-complement	tandem						no summit upstream				48.558	none	1	0	0	0	0	1
YBR-II30C	OM14	R-II	class_I	IG_440_genes-complement	divergent						no summit upstream				60.7007	none	1	1	1	0	0	1
YBR-II30W-A		R-III	class_I	IG_440_genes-complement	divergent						no summit upstream				60.7007	none	1	1	1	1	0	1
YBR-II31C	SWC5	R-II	class_III	IG_442_genes-complement	tandem						no summit upstream				31.3208	none	0	0	0	0	1	0
YBR-II33W-A	DAD3	R-II	class_IV	IG_443_genes-complement	tandem						no summit upstream				26.355	none	1	0	0	1	0	1
YBR-II34C	ARC40	R-III	class_IV	IG_445_genes-complement	divergent						no summit upstream				29.1646	none	1	0	0	1	0	1
YBR-II35W	VHC1	R-III	class_III	IG_445_genes-complement	divergent						no summit upstream				29.1646	none	0	0	0	1	0	1
YBR-II36C	ABD1	R-III	class_IV	IG_447_genes-complement	divergent						no summit upstream				20.4726	none	0	0	0	1	0	1
YBR-II37W	PRP5	R-III	class_IV	IG_447_genes-complement	divergent						no summit upstream				20.4726	none	0	0	0	0	1	0
YBR-II38C		R-II	class_IV	IG_449_genes-complement	tandem	chr02	697881	697882	6d_IP_vs_untagged_cer_reps_peak_148	-519	mild	1.56157	16.3182	151	35.1901	any	0	0	0	1	0	1
YBR-II39C	ERT1	R-II	class_IV	IG_450_genes-complement	tandem						no summit upstream				15.941	none	0	0	0	1	0	1
YBR-II40C	THI2	R-III	class_IV	IG_451_genes-complement	tandem	chr02	702282	702283	6d_IP_vs_untagged_cer_reps_peak_149	-374	mild	1.48686	12.7769	116	29.0668	any	0	0	0	0	1	0
YBR-II41C		R-III	class_III	IG_452_genes-complement	divergent	chr02	704239	704240	6d_IP_vs_untagged_cer_reps_peak_150	-108	mild	1.35176	7.45778	64	33.4692	any	1	0	0	0	0	1
YBR-II42W		R-II	class_III	IG_452_genes-complement	divergent	chr02	704239	704240	6d_IP_vs_untagged_cer_reps_peak_150	-311	mild	1.35176	7.45778	64	33.4692	any	1	0	0	1	0	1
YBR-II43C	ALG7	R-II	class_IV	IG_454_genes-complement	divergent						no summit upstream				34.266	none	0	0	0	1	0	1
YBR-II44W	GPX2	R-III	class_IV	IG_454_genes-complement	divergent						no summit upstream				34.266	none	0	0	0	1	0	1
YBR-II45C	ISW1	R-III	class_III	IG_456_genes-complement	divergent						no summit upstream				24.8283	none	0	0	0	1	0	1
YBR-II46W	RRT2	R-III	class_IV	IG_456_genes-complement	divergent						no summit upstream				24.8283	none	0	0	0	1	0	1
YBR-II47C	ENP1	R-II	class_IV	IG_458_genes-complement	tandem						no summit upstream				25.3381	none	0	0	0	1	0	1
YBR-II48C	HIS7	R-III	class_IV	IG_459_genes-complement	tandem						no summit upstream				26.5596	none	1	0	0	1	0	1
YBR-II49C	ARO4	R-II	class_IV	IG_460_genes-complement	divergent						no summit upstream				29.2381	none	1	0	0	1	0	1
YBR-II50W	SPO23	R-III	class_IV	IG_460_genes-complement	divergent						no summit upstream				29.2381	none	0	0	0	0	1	0
YBR-II51W	MRPS5	R-III	class_IV	IG_461_genes-complement	tandem						no summit upstream				26.2291	none	0	0	0	1	0	1
YBR-II52W	DUT1	R-III	class_IV	IG_462_genes-complement	tandem						no summit upstream				29.6501	none	0	0	0	1	0	1
YBR-II53W	SRB6	R-II	class_IV	IG_463_genes-complement	tandem						no summit upstream				26.7788	none	1	0	0	1	0	1
YBR-II54C	TRS20	R-III	class_IV	IG_465_genes-complement	divergent						no summit upstream				24.962	none	0	0	0	1	0	1
YBR-II55C-A	RCF3	R-III	class_III	IG_467_genes-complement	tandem						no summit upstream				33.0793	none	1	0	0	1	0	1
YBR-II55W	MTC4	R-III	class_III	IG_465_genes-complement	divergent						no summit upstream				24.962	none	1	0	0	0	0	1
YBR-II56C	RIB5	R-III	class_IV	IG_468_genes-complement	divergent						no summit upstream				35.1154	none	1	0	0	1	0	1
YBR-II57W	POP4	R-II	class_IV	IG_468_genes-complement	divergent						no summit upstream				35.1154	none	1	0	0	1	0	1
YBR-II58C	SHG1	R-III	class_IV	IG_470_genes-complement	divergent						no summit upstream				23.6528	none	1	0	0	1	0	1
YBR-II59W		R-III	class_IV	IG_470_genes-complement	divergent						no summit upstream				23.6528	none	0	0	0	0	1	0
YBR-II60C	RGD1	R-III	class_IV	IG_472_genes-complement	tandem						no summit upstream				21.6475	none	0	0	0	1	0	1
YBR-II61C	TAE1	R-III	class_IV	IG_473_genes-complement	tandem						no summit upstream				16.8581	none	0	0	0	1	0	1
YBR-II62C		R-III	class_IV	IG_474_genes-complement	divergent						no summit upstream				30.2134	none	1	0	0	1	0	1
YBR-II63W	SHM1	R-III	class_IV	IG_474_genes-complement	divergent						no summit upstream				30.2134	none	1	0	0	1	0	1
YBR-II64C	YPT10	R-III	class_IV	IG_476_genes-complement	divergent						no summit upstream				28.7639	none	1	0	0	1	0	1
YBR-II65W	TSC10	R-III	class_III	IG_476_genes-complement	divergent						no summit upstream				28.7639	none	0	0	0	1	0	1
YBR-II67W	REI1	R-II	class_IV	IG_477_genes-complement	tandem						no summit upstream				22.6451	none	0	0	0	1	0	1
YBR-II68W	MRPL37	R-III	class_IV	IG_478_genes-complement	tandem						no summit upstream				33.7785	none	0	0	0	1	0	1
YBR-II69C	SDH8	R-II	class_III	IG_480_genes-complement	tandem						no summit upstream				47.4067	none	1	0	0	0	0	1
YBR-II70C	BIT2	R-III	class_IV	IG_481_genes-complement	divergent						no summit upstream				28.5288	none	1	0	0	0	0	1
YBR-II71W	EFM2	R-III	class_IV	IG_481_genes-complement	divergent						no summit upstream				28.5288	none	0	0	0	1	0	1
YBR-II72C	HSM3	R-III	class_III	IG_483_genes-complement	tandem						no summit upstream				25.7803	none	0	0	0	0	1	0
YBR-II73C	UBX7	R-III	class_III	IG_484_genes-complement	divergent						no summit upstream				31.3743	none	1	0	0	0	0	1
YBR-II74W	CHK1	R-III	class_IV	IG_484_genes-complement	divergent						no summit upstream				31.3743	none	0	0	0	0	1	0
YBR-II75C	RIF1	R-III	class_IV	IG_486_genes-complement	tandem						no summit upstream				23.2121	none	0	0	0	0	1	0
YBR-II76C	PPS1	R-III	class_IV	IG_487_genes-complement	tandem						no summit upstream				23.2368	none	0	0	0	0	1	0
YBR-II79W	PAF1	R-II	class_III	IG_488_genes-complement	tandem	chr02	760993	760994	6d_IP_vs_untagged_cer_reps_peak_153	-228	mild	1.90489	37.7835	363	45.1858	any	1	0	0	1	0	1
YBR-II80C	SAF1	R-III	class_III	IG_490_genes-complement	tandem						no summit upstream				30.9231	none	1	0	0	0	0	1
YBR-II81C	DUG2	R-III	class_IV	IG_491_genes-complement	divergent						no summit upstream				28.6004	none	0	0	0	0	1	0
YBR-II82W	MRPL27	R-III	class_IV	IG_491_genes-complement	divergent						no summit upstream				28.6004	none	1	0	0	1	0	1
YBR-II83C	SSH1	R-II	class_III	IG_493_genes-complement	divergent	chr02	770620	770621	6d_IP_vs_untagged_cer_reps_peak_154	-63	mild	1.52978	14.7792	136	34.4031	any	1	0	0	1	0	1
YBR-II84W		R-III	class_IV	IG_493_genes-complement	divergent	chr02	770620	770621	6d_IP_vs_untagged_cer_reps_peak_154	-545	mild	1.52978	14.7792	136	34.4031	any	0	0	0	0	1	0
YBR-II85W		R-III	class_IV	IG_494_genes-complement	tandem						no summit upstream				22.1748	none	1	0	0	0	0	1
YBR-II86W	APE3	R-III	class_III	IG_495_genes-complement	tandem						no summit upstream				25.465	none	1	0	0	1	0	1
YBR-II87W		R-II	class_I	IG_496_genes-complement	tandem	chr02	776566	776567	6d_IP_vs_untagged_cer_reps_peak_155	33	strong	2.55339	95.7335	940	62.5584	any	1	0	1	1	0	1
YBR-II88C	APM3	R-III	class_IV	IG_498_genes-complement	divergent						no summit upstream				28.0202	none	1	0	0	1	0	1
YBR-II89W	SNF5	R-III	class_III	IG_498_genes-complement	divergent						no summit upstream				28.0202	none	0	0	0	1	0	1
YBR-II90W	BSD2	R-II	class_III	IG_499_genes-complement	tandem						no summit upstream				52.3794	none	1	0	0	1	0	1
YBR-II91C	CTP1	R-II	class_IV	IG_501_genes-complement	tandem						no summit upstream				36.1176	none	1	0	0	1	0	1
YBR-II92C		R-III	class_IV	IG_502_genes-complement	divergent						no summit upstream				23.8096	none	1	0	0	1	0	1
YBR-II93W	VBA2	R-III	class_IV	IG_502_genes-complement	divergent						no summit upstream				23.8096	none	0	0	0	1	0	1
YBR-II94W	SUL1	R-II	class_III	IG_503_genes-complement	tandem	chr02	788824	788825	6d_IP_vs_untagged_cer_reps_peak_159	-325	mild	1.55839	16.3182	151	32.9142	any	0	0	0	0	1	0
YBR-II95W	PCA1	R-III	class_III	IG_504_genes-complement	tandem	chr02	792190	792191	6d_IP_vs_untagged_cer_reps_peak_160	-600	mild	1.62991	20.029	187	33.0579	any	1	0	0	0	0	1
YBR-II96C	PHO89	R-I	class_I	IG_506_genes-complement	tandem	chr02	799015	799016	6d_IP_vs_untagged_cer_reps_peak_161	-454	strong	4.56883	378.759	3761	74.9994	any	1	0	1	0	0	1
YBR-II96C-A		R-II	class_II	IG_507_genes-complement	divergent						no summit upstream				76.9181	none	1	0	1	0	0	1
YBR-II97W	MAL33	R-II	class_IV	IG_507_genes-complement	divergent						no summit upstream				76.9181	none	1	0	0	0	0	1
YBR-II98C	MAL31	R-III	class_III	IG_509_genes-complement	tandem	chr02	804923	804924	6d_IP_vs_untagged_cer_reps_peak_162	-363	mild	1.38037	8.44223	73	34.1812	any	1	0	0	1	0	1
YBR-II98C-A		R-III	class_IV	IG_510_genes-complement	divergent						no summit upstream				16.4709	none	0	0	0	0	1	0
YBR-II99W	MAL32	R-III	class_IV	IG_510_genes-complement	divergent						no summit upstream				16.4709	none	0	0	0	0	1	0
YCL001W	RER-I	R-III	class_IV	IG_572_genes-complement	divergent						no summit upstream				39.5009	none	1	0	0	1	0	1
YCL001W-A		R-III	class_IV	IG_573_genes-complement	tandem						no summit upstream				19.3162	none	1	0	0	0	0	1
YCL001W-B		R-III	class_IV	IG_574_genes-complement	tandem						no summit upstream				21.5366	none	0	0	0	0	1	0
YCL002C		R-III	class_III	IG_572_genes-complement	divergent						no summit upstream				39.5009	none	1	0	0	1	0	1
YCL004W	PGS1	R-III	class_IV	IG_570_genes-complement	tandem						no summit upstream				20.654	none	1	0	0	1	0	1
YCL005W	LDB16	R-II	class_IV	IG_569_genes-complement	tandem	chr03	107749	107750	6d_IP_vs_untagged_cer_reps_peak_178	-194	mild	1.50753	13.8526	126	36.3717	any	0	0	0	1	0	1
YCL008C	STP22	R-III	class_IV	IG_568_genes-complement	tandem						no summit upstream				37.8436	none	0	0	0	1	0	1
YCL009C	ILV6	R-II	class_III	IG_567_genes-complement	tandem						no summit upstream				29.9337	none	1	0	0	1	0	1
YCL010C	SGF29	R-II	class_III	IG_566_genes-complement	tandem	chr03	104415	104416	6d_IP_vs_untagged_cer_reps_peak_177	-34	mild	1.58223	17.5174	163	45.5585	any	1	0	0	1	0	1
YCL011C	GBP2	R-II	class_III	IG_565_genes-complement	tandem						no summit upstream				34.789	none	1	0	0	1	0	1
YCL012C		R-III	class_III	IG_564_genes-complement	tandem						no summit upstream				30.2869	none	1	0	0	1	0	1
YCL014W	BUD3	R-III	class_IV	IG_562_genes-complement	divergent						no summit upstream				35.686	none	0	0	0	1	0	1
YCL016C	DCC1	R-III	class_IV	IG_562_genes-complement	divergent						no summit upstream				35.686	none	0	0	0	0	1	0
YCL017C	NFS1	R-II	class_III	IG_561_genes-complement	tandem						no summit upstream				28.9028	none	1	0	0	1	0	1
YCL018W	LEU2	R-III	class_II	IG_559_genes-complement	tandem	chr03	91086	91087	6d_IP_vs_untagged_cer_reps_peak_176	-202	strong	3.77804	370.233	3676	30.333	any	1	0	1	1	0	1
YCL021W-A		R-III	class_IV	IG_558_genes-complement	tandem						no summit upstream				21.5651	none	0	0	0	1	0	1
YCL025C	AGP1	R-I	class_I	IG_557_genes-complement	tandem	chr03	78454	78455	6d_IP_vs_untagged_cer_reps_peak_175	-507	strong	5.85152	615.529	6125	107.967	any	1	0	1	1	0	1
YCL026C-A	FRM2	R-III	class_IV	IG_556_genes-complement	tandem	chr03	75896	75897	6d_IP_vs_untagged_cer_reps_peak_174	-571	mild	1.7523	27.1908	258	33.8816	any	0	0	0	0	1	0
YCL026C-B	HBN1	R-III	class_IV	IG_555_genes-complement	tandem						no summit upstream				25.7886	none	0	0	0	0	1	0
YCL027W	FUS1	R-III	class_IV	IG_553_genes-complement	tandem						no summit upstream				34.1631	none	0	0	0	0	1	0
YCL028W	RNQ1	R-III	class_IV	IG_552_genes-complement	divergent						no summit upstream				23.7331	none	0	0	0	0	1	0
YCL029C	BIK1	R-III	class_IV	IG_552_genes-complement	divergent						no summit upstream				23.7331	none	1	0	0	1	0	1
YCL030C	HIS4	R-III	class_IV	IG_551_genes-complement	tandem						no summit upstream				17.9662	none	1	0	0	1	0	1
YCL031C	RRP7	R-II	class_III	IG_550_genes-complement	tandem						no summit upstream				26.1019	none	1	0	0	1	0	1
YCL032W	STE50	R-III	class_IV	IG_548_genes-complement	divergent						no summit upstream				25.0188	none	1	0	0	1	0	1
YCL033C	MXR-II	R-III	class_IV	IG_548_genes-complement	divergent						no summit upstream				25.0188	none	1	0	0	0	0	1
YCL034W	LSB5	R-III	class_IV	IG_546_genes-complement	divergent	chr03	61409	61410	6d_IP_vs_untagged_cer_reps_peak_173	-214	mild	1.55044	15.927	147	40.0514	any	1	0	0	0	0	1
YCL035C	GRX1	R-II	class_III	IG_546_genes-complement	divergent	chr03	61409	61410	6d_IP_vs_untagged_cer_reps_peak_173	-186	mild	1.55044	15.927	147	40.0514	any	1	0	0	1	0	1
YCL036W	GFD2	R-II	class_IV	IG_544_genes-complement	divergent						no summit upstream				36.6105	none	1	0	0	1	0	1
YCL037C	SRO9	R-I	class_III	IG_544_genes-complement	divergent						no summit upstream				36.6105	none	1	0	0	1	0	1
YCL038C	ATG22	R-II	class_III	IG_543_genes-complement	tandem	chr03	56737	56738	6d_IP_vs_untagged_cer_reps_peak_172	-123	mild	1.98913	43.9166	424	37.7294	any	1	0	0	1	0	1
YCL039W	GID7	R-III	class_III	IG_541_genes-complement	tandem	chr03	52527	52528	6d_IP_vs_untagged_cer_reps_peak_171	-68	mild	1.53932	15.3483	141	43.7592	any	1	0	0	1	0	1
YCL044C	MGR-I	R-III	class_III	IG_540_genes-complement	tandem						no summit upstream				39.4775	none	1	0	0	1	0	1
YCL047C	POF1	R-III	class_IV	IG_538_genes-complement	tandem						no summit upstream				16.6784	none	0	0	0	0	1	0
YCL048W	SPS22	R-III	class_IV	IG_536_genes-complement	tandem						no summit upstream				23.2851	none	0	0	0	0	1	0
YCL048W-A		R-III	class_III	IG_535_genes-complement	divergent	chr03	41209	41210	6d_IP_vs_untagged_cer_reps_peak_168	-279	mild	2.22914	64.1469	625	51.9976	any	1	0	0	0	0	1
YCL049C		R-III	class_IV	IG_535_genes-complement	divergent	chr03	41209	41210	6d_IP_vs_untagged_cer_reps_peak_168	-433	mild	2.22914	64.1469	625	51.9976	any	1	0	0	1	0	1
YCL050C	APA1	R-II	class_IV	IG_534_genes-complement	tandem	chr03	39530	39531	6d_IP_vs_untagged_cer_reps_peak_167	-669	mild	1.34222	7.05395	60	35.2657	any	1	0	0	1	0	1
YCL051W	LRE1	R-III	class_III	IG_532_genes-complement	divergent						no summit upstream				26.7057	none	1	0	0	0	0	1
YCL052C	PBN1	R-III	class_III	IG_532_genes-complement	divergent						no summit upstream				26.7057	none	1	0	0	1	0	1
YCL054W	SPB1	R-I	class_IV	IG_530_genes-complement	tandem						no summit upstream				24.8871	none	0	0	0	1	0	1
YCL054W-A	RDT1	R-III	class_IV	IG_529_genes-complement	tandem						no summit upstream				23.4943	none	0	0	0	1	0	1
YCL055W	KAR4	R-III	class_IV	IG_528_genes-complement	divergent						no summit upstream				25.85	none	0	0	0	1	0	1
YCL056C	PEX34	R-III	class_IV	IG_528_genes-complement	divergent						no summit upstream				25.85	none	1	0	0	1	0	1
YCL057C-A		R-III	class_IV	IG_526_genes-complement	divergent						no summit upstream				32.78	none	1	0	0	1	0	1
YCL057W	PRD1	R-III	class_IV	IG_526_genes-complement	divergent						no summit upstream				32.78	none	1	0	0	1	0	1
YCL058C	FYV5	R-III	class_IV	IG_525_genes-complement	tandem						no summit upstream				27.2129	none	1	0	0	1	0	1
YCL059C	KRR-I	R-II	class_IV	IG_524_genes-complement	tandem						no summit upstream				25.8416	none	0	0	0	1	0	1
YCL061C	MRC1	R-III	class_IV	IG_523_genes-complement	tandem						no summit upstream				31.6051	none	0	0	0	1	0	1
YCL063W	VAC17	R-III	class_IV	IG_521_genes-complement	divergent	chr03	17097	17098	6d_IP_vs_untagged_cer_reps_peak_166	-156	mild	1.53773	15.1575	139	41.0923	any	0	0	0	1	0	1
YCL064C	CHA1	R-III	class_IV	IG_521_genes-complement	divergent	chr03	17097	17098	6d_IP_vs_untagged_cer_reps_peak_166	-144	mild	1.53773	15.1575	139	41.0923	any	1	0	0	1	0	1
YCL066W	HMLALPHA1	R-III	class_IV	IG_519_genes-complement	divergent						no summit upstream				0	none	0	0	0	0	1	0
YCL067C	HMLALPHA2	R-III	class_IV	IG_519_genes-complement	divergent						no summit upstream				0	none	0	0	0	0	1	0
YCL068C		R-III	class_IV	IG_518_genes-complement	tandem						no summit upstream				9.62066	none	0	0	0	0	1	0
YCL069W	VBA3	R-III	class_IV	IG_516_genes-complement	divergent						no summit upstream				18.0547	none	0	0	0	0	1	0
YCL073C	GEX1	R-III	class_IV	IG_516_genes-complement	divergent						no summit upstream				18.0547	none	0	0	0	0	1	0
YCR001W		R-III	class_IV	IG_575_genes-complement	tandem	chr03	114393	114394	6d_IP_vs_untagged_cer_reps_peak_179	-1209	mild	1.62513	20.1346	188	27.5062	any	0	0	0	0	1	0
YCR002C	CDC10	R-III	class_IV	IG_577_genes-complement	divergent						no summit upstream				31.4581	none	0	0	0	1	0	1
YCR003W	MRPL32	R-III	class_IV	IG_577_genes-complement	divergent						no summit upstream				31.4581	none	0	0	0	1	0	1
YCR004C	YCP4	R-III	class_III	IG_579_genes-complement	tandem						no summit upstream				41.9693	none	1	0	0	1	0	1
YCR005C	CIT2	R-I	class_III	IG_580_genes-complement	tandem						no summit upstream				93.7046	none	1	0	0	1	0	1
YCR006C		R-III	class_II	IG_581_genes-complement	tandem	chr03	125370	125371	6d_IP_vs_untagged_cer_reps_peak_182	-2280	strong	3.17487	169.055	1670	86.5066	any	1	0	1	0	0	1
YCR007C		R-II	class_I	IG_582_genes-complement	divergent						no summit upstream				60.552	none	1	0	1	1	0	1
YCR008W	SAT4	RØ	class_III	IG_582_genes-complement	divergent						no summit upstream				60.552	none	1	0	0	1	0	1
YCR009C	RVS161	R-II	class_III	IG_584_genes-complement	tandem						no summit upstream				142.59	none	1	0	0	1	0	1
YCR010C	ADY2	RØ	class_I	IG_585_genes-complement	tandem						no summit upstream				225.69	none	1	1	1	0	0	1
YCR011C	ADP1	R-III	class_IV	IG_586_genes-complement	divergent	chr03	137196	137197	6d_IP_vs_untagged_cer_reps_peak_186	-194	mild	1.9335	39.7854	383	42.0475	any	1	0	0	1	0	1
YCR012W	PGK1	R-III	class_IV	IG_586_genes-complement	divergent	chr03	137196	137197	6d_IP_vs_untagged_cer_reps_peak_186	-508	mild	1.9335	39.7854	383	42.0475	any	1	0	0	1	0	1
YCR013C		R-III	class_IV	IG_587_genes-complement	tandem						no summit upstream				16.9513	none	1	0	0	1	0	1
YCR014C	POL4	R-III	class_IV	IG_588_genes-complement	tandem						no summit upstream				26.8225	none	1	0	0	1	0	1
YCR015C	CTO1	R-III	class_IV	IG_589_genes-complement	divergent						no summit upstream				27.6242	none	1	0	0	1	0	1
YCR016W		R-II	class_IV	IG_589_genes-complement	divergent						no summit upstream				27.6242	none	0	0	0	1	0	1
YCR017C	CWH43	R-III	class_IV	IG_591_genes-complement	tandem						no summit upstream				25.8966	none	0	0	0	1	0	1
YCR018C	SRD1	R-III	class_IV	IG_592_genes-complement	tandem						no summit upstream				2.41275	none	1	0	0	1	0	1
YCR018C-A		R-III	class_IV	IG_593_genes-complement	divergent						no summit upstream				21.7236	none	0	0	0	1	0	1
YCR019W	MAK32	R-III	class_IV	IG_593_genes-complement	divergent						no summit upstream				21.7236	none	0	0	0	0	1	0
YCR020C	PET18	R-III	class_IV	IG_595_genes-complement	tandem						no summit upstream				19.3308	none	1	0	0	0	0	1
YCR020C-A	MAK31	R-II	class_IV	IG_596_genes-complement	divergent						no summit upstream				36.3482	none	0	0	0	1	0	1
YCR020W-B	HTL1	R-II	class_IV	IG_596_genes-complement	divergent						no summit upstream				36.3482	none	1	0	0	1	0	1
YCR021C	HSP30	R-III	class_IV	IG_598_genes-complement	tandem						no summit upstream				18.7142	none	1	0	0	0	0	1
YCR022C		R-III	class_IV	IG_599_genes-complement	tandem						no summit upstream				25.8262	none	1	0	0	0	0	1
YCR023C		R-III	class_IV	IG_600_genes-complement	tandem						no summit upstream				28.4769	none	1	0	0	1	0	1
YCR024C	SLM5	R-III	class_IV	IG_601_genes-complement	tandem						no summit upstream				31.4016	none	1	0	0	1	0	1
YCR024C-A	PMP1	R-I	class_III	IG_603_genes-complement	tandem						no summit upstream				50.412	none	1	0	0	1	0	1
YCR024C-B		R-I	class_III	IG_602_genes-complement	tandem						no summit upstream				35.771	none	1	0	0	1	0	1
YCR025C		R-III	class_II	IG_604_genes-complement	tandem						no summit upstream				39.0702	none	0	0	1	1	0	1
YCR026C	NPP1	R-II	class_III	IG_605_genes-complement	tandem						no summit upstream				23.8655	none	1	0	0	1	0	1
YCR027C	RHB1	R-II	class_IV	IG_606_genes-complement	tandem						no summit upstream				23.5764	none	0	0	0	0	1	0
YCR028C	FEN2	R-II	class_III	IG_607_genes-complement	tandem						no summit upstream				29.9849	none	1	0	0	1	0	1
YCR028C-A	RIM1	R-III	class_IV	IG_608_genes-complement	tandem						no summit upstream				26.856	none	1	0	0	1	0	1
YCR030C	SYP1	R-III	class_III	IG_609_genes-complement	tandem						no summit upstream				31.5199	none	1	0	0	1	0	1
YCR031C	RPS14A	R-II	class_IV	IG_610_genes-complement	divergent	chr03	178404	178405	6d_IP_vs_untagged_cer_reps_peak_188	-159	mild	2.17669	59.3131	577	35.1758	any	1	0	0	1	0	1
YCR032W	BPH1	R-III	class_IV	IG_610_genes-complement	divergent	chr03	178404	178405	6d_IP_vs_untagged_cer_reps_peak_188	-1032	mild	2.17669	59.3131	577	35.1758	any	0	0	0	1	0	1
YCR033W	SNT1	R-II	class_III	IG_611_genes-complement	tandem						no summit upstream				35.7309	none	0	0	0	1	0	1
YCR034W		R-III	class_IV	IG_612_genes-complement	tandem						no summit upstream				34.6659	none	0	0	0	1	0	1
YCR035C	RRP43	R-II	class_IV	IG_614_genes-complement	divergent						no summit upstream				39.3678	none	1	0	0	1	0	1
YCR036W	RBK1	R-III	class_IV	IG_614_genes-complement	divergent						no summit upstream				39.3678	none	1	0	0	1	0	1
YCR037C	PHO87	R-II	class_III	IG_616_genes-complement	tandem	chr03	197270	197271	6d_IP_vs_untagged_cer_reps_peak_189	-40	mild	1.90966	38.0668	366	53.1557	any	1	0	0	1	0	1
YCR039C	MATALPHA2	R-III	class_IV	IG_617_genes-complement	divergent						no summit upstream				0	none	0	0	0	0	1	0
YCR040W	MATALPHA1	R-III	class_IV	IG_617_genes-complement	divergent						no summit upstream				0	none	0	0	0	0	1	0
YCR042C	TAF2	R-III	class_IV	IG_618_genes-complement	tandem						no summit upstream				20.5614	none	0	0	0	1	0	1
YCR043C		R-III	class_IV	IG_619_genes-complement	tandem						no summit upstream				24.6028	none	0	0	0	1	0	1
YCR044C	PER-I	R-III	class_IV	IG_620_genes-complement	tandem						no summit upstream				27.3374	none	0	0	0	1	0	1
YCR045C	RRT12	R-III	class_IV	IG_621_genes-complement	tandem						no summit upstream				20.6585	none	0	0	0	1	0	1
YCR046C	IMG1	R-III	class_IV	IG_622_genes-complement	tandem						no summit upstream				37.6168	none	1	0	0	1	0	1
YCR047C	BUD23	R-II	class_IV	IG_623_genes-complement	tandem						no summit upstream				35.0159	none	0	0	0	1	0	1
YCR050C		R-III	class_III	IG_624_genes-complement	divergent						no summit upstream				29.4482	none	0	0	0	1	0	1
YCR051W		R-III	class_IV	IG_624_genes-complement	divergent						no summit upstream				29.4482	none	1	0	0	1	0	1
YCR052W	RSC6	R-III	class_IV	IG_625_genes-complement	tandem						no summit upstream				31.6505	none	0	0	0	1	0	1
YCR053W	THR4	R-II	class_IV	IG_626_genes-complement	tandem						no summit upstream				29.409	none	1	0	0	1	0	1
YCR054C	CTR86	R-III	class_IV	IG_628_genes-complement	tandem						no summit upstream				18.9389	none	0	0	0	1	0	1
YCR057C	PWP2	R-II	class_IV	IG_629_genes-complement	tandem						no summit upstream				28.3812	none	0	0	0	1	0	1
YCR059C	YIH1	R-III	class_IV	IG_630_genes-complement	divergent						no summit upstream				26.4262	none	0	0	0	1	0	1
YCR060W	TAH1	R-III	class_IV	IG_630_genes-complement	divergent						no summit upstream				26.4262	none	0	0	0	1	0	1
YCR061W		R-II	class_III	IG_631_genes-complement	tandem	chr03	225362	225363	6d_IP_vs_untagged_cer_reps_peak_190	-160	strong	2.52955	93.2902	915	48.746	any	1	0	0	0	0	1
YCR065W	HCM1	R-II	class_IV	IG_633_genes-complement	tandem	chr03	228962	228963	6d_IP_vs_untagged_cer_reps_peak_192	-283	strong	2.49299	89.6703	879	50.4048	any	0	0	0	1	0	1
YCR066W	RAD18	R-III	class_IV	IG_634_genes-complement	tandem						no summit upstream				19.1057	none	0	0	0	1	0	1
YCR067C	SED4	R-III	class_IV	IG_636_genes-complement	divergent	chr03	236562	236563	6d_IP_vs_untagged_cer_reps_peak_193	-142	strong	2.52001	92.0775	903	54.4501	any	0	0	0	1	0	1
YCR068W	ATG15	R-II	class_III	IG_636_genes-complement	divergent	chr03	236562	236563	6d_IP_vs_untagged_cer_reps_peak_193	-536	strong	2.52001	92.0775	903	54.4501	any	1	0	0	0	0	1
YCR069W	CPR4	R-II	class_III	IG_637_genes-complement	tandem						no summit upstream				63.7393	none	1	0	0	1	0	1
YCR071C	IMG2	R-III	class_IV	IG_639_genes-complement	tandem						no summit upstream				30.5505	none	1	0	0	1	0	1
YCR072C	RSA4	R-II	class_IV	IG_640_genes-complement	tandem						no summit upstream				27.2001	none	0	0	0	1	0	1
YCR073C	SSK22	R-III	class_IV	IG_641_genes-complement	divergent	chr03	246805	246806	6d_IP_vs_untagged_cer_reps_peak_195	-157	strong	3.01275	148.37	1464	73.693	any	0	0	0	1	0	1
YCR073W-A	SOL2	R-III	class_III	IG_641_genes-complement	divergent	chr03	246805	246806	6d_IP_vs_untagged_cer_reps_peak_195	-137	strong	3.01275	148.37	1464	73.693	any	1	0	0	0	0	1
YCR075C	ERS1	R-III	class_IV	IG_643_genes-complement	divergent						no summit upstream				28.174	none	1	0	0	0	0	1
YCR075W-A	EGO2	R-III	class_IV	IG_643_genes-complement	divergent						no summit upstream				28.174	none	1	0	0	0	0	1
YCR076C	FUB1	R-III	class_III	IG_645_genes-complement	tandem						no summit upstream				25.1998	none	1	0	0	1	0	1
YCR077C	PAT1	R-III	class_III	IG_646_genes-complement	divergent						no summit upstream				30.2274	none	1	0	0	1	0	1
YCR079W	PTC6	R-III	class_IV	IG_646_genes-complement	divergent						no summit upstream				30.2274	none	1	0	0	1	0	1
YCR081W	SRB8	R-III	class_IV	IG_647_genes-complement	tandem						no summit upstream				19.7336	none	0	0	0	0	1	0
YCR082W	AHC2	R-II	class_III	IG_648_genes-complement	tandem						no summit upstream				30.5187	none	1	0	0	1	0	1
YCR083W	TRX3	R-II	class_III	IG_649_genes-complement	tandem	chr03	259533	259534	6d_IP_vs_untagged_cer_reps_peak_197	-31	mild	1.58382	17.5174	163	42.5046	any	1	0	0	1	0	1
YCR084C	TUP1	R-II	class_III	IG_651_genes-complement	divergent	chr03	262858	262859	6d_IP_vs_untagged_cer_reps_peak_198	-360	strong	2.46756	86.8926	852	57.2078	any	1	0	0	1	0	1
YCR085W		R-III	class_IV	IG_651_genes-complement	divergent	chr03	262858	262859	6d_IP_vs_untagged_cer_reps_peak_198	52	strong	2.46756	86.8926	852	57.2078	any	0	0	0	0	1	0
YCR086W	CSM1	R-III	class_IV	IG_652_genes-complement	tandem						no summit upstream				25.757	none	0	0	0	1	0	1
YCR087W		R-III	class_IV	IG_653_genes-complement	tandem						no summit upstream				19.7543	none	0	0	0	1	0	1
YCR088W	ABP1	R-III	class_IV	IG_654_genes-complement	tandem						no summit upstream				23.4816	none	0	0	0	1	0	1
YCR089W	FIG2	R-III	class_IV	IG_655_genes-complement	tandem						no summit upstream				23.4102	none	0	0	0	0	1	0
YCR090C		R-III	class_IV	IG_657_genes-complement	divergent	chr03	274171	274172	6d_IP_vs_untagged_cer_reps_peak_199	-1280	mild	1.92082	38.981	375	25.4813	any	0	0	0	1	0	1
YCR091W	KIN82	R-III	class_III	IG_657_genes-complement	divergent	chr03	274171	274172	6d_IP_vs_untagged_cer_reps_peak_199	-169	mild	1.92082	38.981	375	25.4813	any	1	0	0	0	0	1
YCR092C	MSH3	R-III	class_IV	IG_659_genes-complement	divergent	chr03	280029	280030	6d_IP_vs_untagged_cer_reps_peak_200	-176	mild	1.54885	15.733	145	41.0051	any	0	0	0	1	0	1
YCR093W	CDC39	R-II	class_III	IG_659_genes-complement	divergent	chr03	280029	280030	6d_IP_vs_untagged_cer_reps_peak_200	-47	mild	1.54885	15.733	145	41.0051	any	1	0	0	1	0	1
YCR094W	CDC50	R-III	class_III	IG_660_genes-complement	tandem						no summit upstream				24.1768	none	1	0	0	0	0	1
YCR095C	OCA4	R-III	class_IV	IG_662_genes-complement	divergent						no summit upstream				24.7122	none	1	0	0	0	0	1
YCR095W-A		R-III	class_IV	IG_662_genes-complement	divergent						no summit upstream				24.7122	none	0	0	0	0	1	0
YCR096C	HMRA2	R-III	class_IV	IG_664_genes-complement	divergent						no summit upstream				35.0923	none	0	0	0	0	1	0
YCR097W	HMRA1	R-II	class_I	IG_664_genes-complement	divergent						no summit upstream				35.0923	none	1	0	1	1	0	1
YCR097W-A		R-III	class_IV	IG_665_genes-complement	tandem						no summit upstream				57.1869	none	0	0	0	0	1	0
YCR098C	GIT1	R-I	class_III	IG_667_genes-complement	tandem	chr03	298776	298777	6d_IP_vs_untagged_cer_reps_peak_203	-111	strong	4.06815	297.245	2948	63.8041	any	1	0	0	0	0	1
YCR-I00C		R-III	class_IV	IG_668_genes-complement	tandem						no summit upstream				14.3189	none	0	0	0	0	1	0
YCR-I01C		R-III	class_IV	IG_669_genes-complement	tandem	chr03	303849	303850	6d_IP_vs_untagged_cer_reps_peak_204	-819	mild	1.5568	16.1221	149	28.2148	any	0	0	0	0	1	0
YCR-I02C		R-III	class_IV	IG_670_genes-complement	divergent	chr03	305798	305799	6d_IP_vs_untagged_cer_reps_peak_205	-264	mild	2.15444	57.6234	560	29.2269	any	0	0	0	0	1	0
YCR-I02W-A		R-III	class_IV	IG_670_genes-complement	divergent	chr03	305798	305799	6d_IP_vs_untagged_cer_reps_peak_205	-937	mild	2.15444	57.6234	560	29.2269	any	0	0	0	0	1	0
YCR-I04W	PAU3	R-III	class_IV	IG_671_genes-complement	tandem						no summit upstream				23.0231	none	0	0	0	0	1	0
YCR-I05W	ADH7	R-III	class_IV	IG_672_genes-complement	tandem						no summit upstream				23.4134	none	0	0	0	0	1	0
YCR-I06W	RDS1	R-III	class_IV	IG_673_genes-complement	tandem						no summit upstream				26.8125	none	0	0	0	1	0	1
YCR-I07W	AAD3	R-III	class_IV	IG_674_genes-complement	tandem						no summit upstream				34.4537	none	1	0	0	1	0	1
YDL001W	RMD1	R-III	class_III	IG_908_genes-complement	divergent	chr04	447750	447751	6d_IP_vs_untagged_cer_reps_peak_294	-175	mild	1.63786	20.4621	192	43.9323	any	0	0	0	1	0	1
YDL002C	NHP10	R-II	class_III	IG_908_genes-complement	divergent	chr04	447750	447751	6d_IP_vs_untagged_cer_reps_peak_294	-105	mild	1.63786	20.4621	192	43.9323	any	0	0	0	1	0	1
YDL003W	MCD1	R-III	class_IV	IG_906_genes-complement	tandem	chr04	444317	444318	6d_IP_vs_untagged_cer_reps_peak_293	-261	mild	1.75071	27.1908	258	38.2017	any	0	0	0	1	0	1
YDL004W	ATP16	R-III	class_III	IG_905_genes-complement	divergent						no summit upstream				32.6439	none	1	0	0	1	0	1
YDL005C	MED2	R-II	class_III	IG_905_genes-complement	divergent						no summit upstream				32.6439	none	1	0	0	1	0	1
YDL006W	PTC1	R-III	class_III	IG_903_genes-complement	tandem	chr04	439457	439458	6d_IP_vs_untagged_cer_reps_peak_292	-389	mild	1.6776	22.6882	214	39.3505	any	1	0	0	1	0	1
YDL007C-A		R-III	class_IV	IG_902_genes-complement	divergent	chr04	437961	437962	6d_IP_vs_untagged_cer_reps_peak_291	-1055	mild	1.51547	14.2199	130	27.2722	any	0	0	0	0	1	0
YDL007W	RPT2	R-II	class_III	IG_902_genes-complement	divergent	chr04	437961	437962	6d_IP_vs_untagged_cer_reps_peak_291	-48	mild	1.51547	14.2199	130	27.2722	any	1	0	0	1	0	1
YDL008W	APC11	R-III	class_IV	IG_900_genes-complement	divergent	chr04	433338	433339	6d_IP_vs_untagged_cer_reps_peak_290	-128	mild	1.56793	16.7137	155	43.8675	any	1	0	0	1	0	1
YDL009C		R-III	class_III	IG_900_genes-complement	divergent	chr04	433338	433339	6d_IP_vs_untagged_cer_reps_peak_290	-90	mild	1.56793	16.7137	155	43.8675	any	1	0	0	1	0	1
YDL012C		R-II	class_III	IG_899_genes-complement	tandem	chr04	432095	432096	6d_IP_vs_untagged_cer_reps_peak_289	-561	mild	1.86515	34.7249	333	47.0797	any	1	0	0	1	0	1
YDL013W	SLX5	R-II	class_III	IG_897_genes-complement	tandem						no summit upstream				29.8143	none	1	0	0	1	0	1
YDL014W	NOP1	R-I	class_IV	IG_896_genes-complement	divergent						no summit upstream				26.9672	none	0	0	0	1	0	1
YDL015C	TSC13	R-II	class_IV	IG_896_genes-complement	divergent						no summit upstream				26.9672	none	1	0	0	1	0	1
YDL016C		R-III	class_IV	IG_895_genes-complement	tandem						no summit upstream				20.6881	none	1	0	0	1	0	1
YDL017W	CDC7	R-III	class_IV	IG_894_genes-complement	divergent						no summit upstream				28.8439	none	0	0	0	1	0	1
YDL018C	ERP3	R-III	class_IV	IG_894_genes-complement	divergent						no summit upstream				28.8439	none	0	0	0	0	1	0
YDL019C	OSH2	R-III	class_III	IG_893_genes-complement	tandem						no summit upstream				25.2807	none	1	0	0	0	0	1
YDL020C	RPN4	R-I	class_III	IG_892_genes-complement	tandem	chr04	416979	416980	6d_IP_vs_untagged_cer_reps_peak_288	-170	strong	2.64558	105.743	1039	51.8789	any	1	0	0	1	0	1
YDL021W	GPM2	R-III	class_IV	IG_890_genes-complement	tandem	chr04	413308	413309	6d_IP_vs_untagged_cer_reps_peak_287	-605	mild	1.7682	28.1832	268	34.4165	any	1	0	0	1	0	1
YDL022C-A		R-II	class_III	IG_889_genes-complement	tandem	chr04	410250	410251	6d_IP_vs_untagged_cer_reps_peak_286	-194	strong	3.97914	283.297	2809	63.1331	any	0	0	0	0	1	0
YDL025C	RTK1	R-II	class_III	IG_888_genes-complement	tandem	chr04	407688	407689	6d_IP_vs_untagged_cer_reps_peak_285	-388	mild	1.66965	22.2349	209	36.0493	any	1	0	0	0	0	1
YDL028C	MPS1	R-III	class_III	IG_886_genes-complement	tandem						no summit upstream				31.0662	none	0	0	0	1	0	1
YDL029W	ARP2	R-III	class_IV	IG_884_genes-complement	tandem						no summit upstream				28.4027	none	1	0	0	1	0	1
YDL030W	PRP9	R-III	class_IV	IG_883_genes-complement	tandem						no summit upstream				25.9426	none	1	0	0	1	0	1
YDL031W	DBP10	R-II	class_IV	IG_882_genes-complement	tandem						no summit upstream				36.2967	none	0	0	0	1	0	1
YDL036C	PUS9	R-III	class_IV	IG_880_genes-complement	tandem						no summit upstream				33.5744	none	0	0	0	1	0	1
YDL037C	BSC1	R-II	class_IV	IG_879_genes-complement	tandem	chr04	386832	386833	6d_IP_vs_untagged_cer_reps_peak_283	-1245	mild	2.00026	44.8236	433	28.9605	any	0	0	0	1	0	1
YDL039C	PRM7	R-II	class_IV	IG_878_genes-complement	tandem						no summit upstream				4.63591	none	0	0	0	1	0	1
YDL040C	NAT1	R-III	class_IV	IG_877_genes-complement	tandem						no summit upstream				19.6661	none	0	0	0	1	0	1
YDL043C	PRP11	R-III	class_IV	IG_875_genes-complement	tandem						no summit upstream				21.1121	none	0	0	0	1	0	1
YDL044C	MTF2	R-III	class_IV	IG_874_genes-complement	tandem						no summit upstream				21.7081	none	0	0	0	1	0	1
YDL045C	FAD1	R-III	class_IV	IG_873_genes-complement	tandem						no summit upstream				25.8312	none	1	0	0	0	0	1
YDL045W-A	MRP10	R-II	class_IV	IG_871_genes-complement	tandem	chr04	372054	372055	6d_IP_vs_untagged_cer_reps_peak_282	-152	mild	2.30703	71.3084	697	50.8513	any	1	0	0	1	0	1
YDL046W	NPC2	R-II	class_III	IG_870_genes-complement	tandem						no summit upstream				30.2543	none	1	0	0	1	0	1
YDL047W	SIT4	R-II	class_III	IG_869_genes-complement	divergent	chr04	368912	368913	6d_IP_vs_untagged_cer_reps_peak_280	-726	strong	5.52727	552.709	5498	92.2994	any	1	0	0	1	0	1
YDL048C	STP4	R-I	class_III	IG_869_genes-complement	divergent	chr04	368912	368913	6d_IP_vs_untagged_cer_reps_peak_280	-653	strong	5.52727	552.709	5498	92.2994	any	1	0	0	1	0	1
YDL049C	KNH1	R-II	class_IV	IG_868_genes-complement	tandem	chr04	366472	366473	6d_IP_vs_untagged_cer_reps_peak_279	-517	strong	2.40239	80.287	786	54.8591	any	1	0	0	1	0	1
YDL050C		R-II	class_IV	IG_867_genes-complement	tandem						no summit upstream				23.2024	none	1	0	0	1	0	1
YDL051W	LHP1	R-II	class_IV	IG_866_genes-complement	divergent						no summit upstream				33.04	none	1	0	0	1	0	1
YDL052C	SLC1	R-III	class_IV	IG_866_genes-complement	divergent						no summit upstream				33.04	none	1	0	0	1	0	1
YDL053C	PBP4	R-II	class_III	IG_865_genes-complement	tandem						no summit upstream				33.4349	none	1	0	0	1	0	1
YDL054C	MCH1	R-II	class_III	IG_864_genes-complement	tandem	chr04	361378	361379	6d_IP_vs_untagged_cer_reps_peak_278	-15	mild	1.58382	17.5174	163	44.6278	any	1	0	0	0	0	1
YDL055C	PSA1	R-I	class_III	IG_863_genes-complement	tandem	chr04	358264	358265	6d_IP_vs_untagged_cer_reps_peak_276	-1358	mild	1.98754	43.9166	424	40.7124	any	1	0	0	1	0	1
YDL055C	PSA1	R-I	class_III	IG_863_genes-complement	tandem	chr04	359615	359616	6d_IP_vs_untagged_cer_reps_peak_277	-2709	mild	2.29908	70.5789	689	40.7124	any	1	0	0	1	0	1
YDL055C	PSA1	R-I	class_III	IG_863_genes-complement	tandem	chr04	357238	357239	6d_IP_vs_untagged_cer_reps_peak_275	-332	strong	2.90625	135.59	1337	40.7124	any	1	0	0	1	0	1
YDL056W	MBP1	R-II	class_IV	IG_861_genes-complement	tandem						no summit upstream				21.932	none	0	0	0	1	0	1
YDL057W		R-III	class_IV	IG_860_genes-complement	tandem						no summit upstream				19.4538	none	0	0	0	0	1	0
YDL058W	USO1	R-III	class_IV	IG_859_genes-complement	divergent						no summit upstream				24.8369	none	0	0	0	1	0	1
YDL059C	RAD59	R-III	class_IV	IG_859_genes-complement	divergent						no summit upstream				24.8369	none	0	0	0	1	0	1
YDL060W	TSR-I	R-II	class_IV	IG_857_genes-complement	divergent	chr04	341344	341345	6d_IP_vs_untagged_cer_reps_peak_274	-234	strong	2.47074	87.2874	856	44.6099	any	0	0	0	1	0	1
YDL061C	RPS29B	R-I	class_IV	IG_857_genes-complement	divergent	chr04	341344	341345	6d_IP_vs_untagged_cer_reps_peak_274	-86	strong	2.47074	87.2874	856	44.6099	any	1	0	0	1	0	1
YDL064W	UBC9	R-III	class_III	IG_854_genes-complement	divergent						no summit upstream				40.6395	none	0	0	0	1	0	1
YDL065C	PEX19	R-II	class_III	IG_854_genes-complement	divergent						no summit upstream				40.6395	none	1	0	0	1	0	1
YDL066W	IDP1	R-III	class_IV	IG_852_genes-complement	divergent						no summit upstream				39.028	none	1	0	0	1	0	1
YDL067C	COX9	R-II	class_III	IG_852_genes-complement	divergent						no summit upstream				39.028	none	1	0	0	1	0	1
YDL072C	YET3	R-II	class_III	IG_849_genes-complement	tandem						no summit upstream				54.0947	none	1	0	0	1	0	1
YDL073W	AHK1	R-III	class_IV	IG_847_genes-complement	divergent	chr04	326156	326157	6d_IP_vs_untagged_cer_reps_peak_270	-341	mild	1.47415	12.2542	111	34.4076	any	0	0	0	1	0	1
YDL074C	BRE1	R-II	class_III	IG_847_genes-complement	divergent	chr04	326156	326157	6d_IP_vs_untagged_cer_reps_peak_270	64	mild	1.47415	12.2542	111	34.4076	any	1	0	0	1	0	1
YDL075W	RPL31A	R-II	class_IV	IG_845_genes-complement	divergent	chr04	321906	321907	6d_IP_vs_untagged_cer_reps_peak_269	-291	strong	2.49776	90.0698	883	52.0608	any	1	0	0	1	0	1
YDL076C	RXT3	R-III	class_III	IG_845_genes-complement	divergent	chr04	321906	321907	6d_IP_vs_untagged_cer_reps_peak_269	-232	strong	2.49776	90.0698	883	52.0608	any	1	0	0	1	0	1
YDL077C	VAM6	R-III	class_IV	IG_844_genes-complement	tandem	chr04	320491	320492	6d_IP_vs_untagged_cer_reps_peak_268	-253	mild	1.62674	19.814	185	40.0511	any	0	0	0	0	1	0
YDL078C	MDH3	R-III	class_III	IG_843_genes-complement	tandem	chr04	316595	316596	6d_IP_vs_untagged_cer_reps_peak_267	-145	mild	1.57428	17.1135	159	35.8835	any	1	0	0	0	0	1
YDL079C	MRK1	R-III	class_III	IG_842_genes-complement	tandem	chr04	315031	315032	6d_IP_vs_untagged_cer_reps_peak_266	-197	strong	2.87446	131.424	1295	63.1027	any	1	0	0	0	0	1
YDL080C	THI3	R-III	class_IV	IG_841_genes-complement	tandem						no summit upstream				35.2297	none	0	0	0	1	0	1
YDL081C	RPP1A	R-I	class_III	IG_840_genes-complement	tandem						no summit upstream				31.7515	none	0	0	0	1	0	1
YDL082W	RPL13A	R-II	class_IV	IG_838_genes-complement	divergent	chr04	308134	308135	6d_IP_vs_untagged_cer_reps_peak_264	-248	mild	1.91443	38.3511	369	44.8598	any	1	0	0	1	0	1
YDL083C	RPS16B	R-II	class_IV	IG_838_genes-complement	divergent	chr04	308134	308135	6d_IP_vs_untagged_cer_reps_peak_264	-317	mild	1.91443	38.3511	369	44.8598	any	1	0	0	1	0	1
YDL084W	SUB2	R-II	class_III	IG_836_genes-complement	tandem	chr04	304899	304900	6d_IP_vs_untagged_cer_reps_peak_263	-208	strong	2.52478	92.8853	911	58.2607	any	1	0	0	1	0	1
YDL085C-A		R-III	class_IV	IG_835_genes-complement	divergent						no summit upstream				54.874	none	1	0	0	1	0	1
YDL085W	NDE2	RØ	class_I	IG_835_genes-complement	divergent						no summit upstream				54.874	none	1	1	1	0	0	1
YDL086W		R-III	class_IV	IG_833_genes-complement	divergent						no summit upstream				23.3584	none	1	0	0	1	0	1
YDL087C	LUC7	R-III	class_IV	IG_833_genes-complement	divergent						no summit upstream				23.3584	none	0	0	0	1	0	1
YDL088C	ASM4	R-II	class_III	IG_832_genes-complement	tandem						no summit upstream				26.0306	none	1	0	0	1	0	1
YDL089W	NUR-I	R-III	class_III	IG_830_genes-complement	divergent						no summit upstream				33.9327	none	0	0	0	0	1	0
YDL090C	RAM1	R-III	class_IV	IG_830_genes-complement	divergent						no summit upstream				33.9327	none	0	0	0	0	1	0
YDL091C	UBX3	R-III	class_III	IG_829_genes-complement	tandem						no summit upstream				23.3576	none	1	0	0	0	0	1
YDL092W	SRP14	R-II	class_III	IG_827_genes-complement	tandem						no summit upstream				29.7215	none	1	0	0	1	0	1
YDL097C	RPN6	R-II	class_III	IG_825_genes-complement	tandem	chr04	286806	286807	6d_IP_vs_untagged_cer_reps_peak_262	-75	mild	1.50594	13.6705	125	44.6322	any	1	0	0	1	0	1
YDL098C	SNU23	R-III	class_IV	IG_824_genes-complement	tandem						no summit upstream				37.7612	none	1	0	0	1	0	1
YDL099W	BUG1	R-III	class_III	IG_822_genes-complement	divergent						no summit upstream				34.4015	none	1	0	0	1	0	1
YDL100C	GET3	R-II	class_III	IG_822_genes-complement	divergent						no summit upstream				34.4015	none	1	0	0	1	0	1
YDL101C	DUN1	R-III	class_IV	IG_821_genes-complement	tandem	chr04	282008	282009	6d_IP_vs_untagged_cer_reps_peak_261	-129	mild	1.48051	12.6016	114	45.2733	any	0	0	0	1	0	1
YDL102W	POL3	R-III	class_IV	IG_819_genes-complement	divergent						no summit upstream				28.7481	none	0	0	0	0	1	0
YDL103C	QRI1	R-III	class_IV	IG_819_genes-complement	divergent						no summit upstream				28.7481	none	0	0	0	0	1	0
YDL104C	QRI7	R-III	class_IV	IG_818_genes-complement	tandem						no summit upstream				18.6688	none	1	0	0	1	0	1
YDL105W	NSE4	R-III	class_IV	IG_816_genes-complement	divergent						no summit upstream				36.6324	none	0	0	0	1	0	1
YDL106C	PHO2	R-II	class_III	IG_816_genes-complement	divergent						no summit upstream				36.6324	none	1	0	0	1	0	1
YDL107W	MSS2	R-III	class_IV	IG_814_genes-complement	tandem						no summit upstream				21.4179	none	1	0	0	1	0	1
YDL108W	KIN28	R-III	class_IV	IG_813_genes-complement	divergent						no summit upstream				23.9449	none	0	0	0	0	1	0
YDL109C		R-III	class_IV	IG_813_genes-complement	divergent						no summit upstream				23.9449	none	0	0	0	0	1	0
YDL110C	TMA17	R-III	class_III	IG_812_genes-complement	tandem	chr04	265050	265051	6d_IP_vs_untagged_cer_reps_peak_260	-32	mild	1.39626	9.03101	79	42.364	any	1	0	0	1	0	1
YDL111C	RRP42	R-II	class_IV	IG_811_genes-complement	tandem	chr04	264293	264294	6d_IP_vs_untagged_cer_reps_peak_259	-122	mild	2.13536	55.9532	544	53.1852	any	0	0	0	1	0	1
YDL112W	TRM3	R-III	class_IV	IG_809_genes-complement	divergent	chr04	258626	258627	6d_IP_vs_untagged_cer_reps_peak_258	-231	mild	1.81906	31.7755	304	44.5247	any	0	0	0	1	0	1
YDL113C	ATG20	R-III	class_III	IG_809_genes-complement	divergent	chr04	258626	258627	6d_IP_vs_untagged_cer_reps_peak_258	-6	mild	1.81906	31.7755	304	44.5247	any	1	0	0	0	0	1
YDL114W		R-III	class_IV	IG_807_genes-complement	divergent						no summit upstream				27.7812	none	0	0	0	0	1	0
YDL115C	IWR-I	R-II	class_III	IG_807_genes-complement	divergent						no summit upstream				27.7812	none	1	0	0	1	0	1
YDL116W	NUP84	R-II	class_IV	IG_805_genes-complement	tandem						no summit upstream				30.482	none	1	0	0	1	0	1
YDL117W	CYK3	R-II	class_IV	IG_804_genes-complement	tandem						no summit upstream				19.7867	none	0	0	0	1	0	1
YDL120W	YFH1	R-III	class_IV	IG_802_genes-complement	divergent						no summit upstream				37.5381	none	1	0	0	1	0	1
YDL121C		R-III	class_IV	IG_802_genes-complement	divergent						no summit upstream				37.5381	none	0	0	0	1	0	1
YDL122W	UBP1	R-I	class_III	IG_800_genes-complement	tandem						no summit upstream				33.8395	none	1	0	0	1	0	1
YDL123W	SNA4	R-II	class_III	IG_799_genes-complement	tandem	chr04	241317	241318	6d_IP_vs_untagged_cer_reps_peak_257	-101	mild	1.89535	36.9386	355	57.8457	any	1	0	0	1	0	1
YDL124W		R-II	class_III	IG_798_genes-complement	divergent	chr04	239897	239898	6d_IP_vs_untagged_cer_reps_peak_256	-319	strong	2.52001	92.0775	903	64.9758	any	1	0	0	1	0	1
YDL125C	HNT1	R-II	class_III	IG_798_genes-complement	divergent	chr04	239897	239898	6d_IP_vs_untagged_cer_reps_peak_256	-161	strong	2.52001	92.0775	903	64.9758	any	1	0	0	1	0	1
YDL126C	CDC48	R-II	class_III	IG_797_genes-complement	tandem	chr04	238846	238847	6d_IP_vs_untagged_cer_reps_peak_255	-134	mild	1.5266	14.5917	134	42.9493	any	1	0	0	1	0	1
YDL127W	PCL2	R-III	class_IV	IG_795_genes-complement	tandem	chr04	234455	234456	6d_IP_vs_untagged_cer_reps_peak_254	-413	strong	2.85981	149.467	1475	52.1401	any	0	0	0	1	0	1
YDL128W	VCX1	R-II	class_III	IG_794_genes-complement	tandem	chr04	232489	232490	6d_IP_vs_untagged_cer_reps_peak_253	-101	mild	1.46302	11.7415	106	34.332	any	1	0	0	1	0	1
YDL129W		R-II	class_III	IG_793_genes-complement	tandem						no summit upstream				32.2834	none	1	0	0	1	0	1
YDL130W	RPP1B	R-II	class_IV	IG_792_genes-complement	tandem	chr04	229589	229590	6d_IP_vs_untagged_cer_reps_peak_252	-288	strong	3.99185	285.103	2827	89.2831	any	1	0	0	1	0	1
YDL130W-A	STF1	RØ	class_III	IG_791_genes-complement	tandem						no summit upstream				41.6161	none	1	1	0	0	0	1
YDL131W	LYS21	R-II	class_III	IG_790_genes-complement	tandem	chr04	227095	227096	6d_IP_vs_untagged_cer_reps_peak_251	-253	strong	2.45961	86.1051	844	41.0289	any	1	0	0	1	0	1
YDL132W	CDC53	R-II	class_III	IG_789_genes-complement	tandem	chr04	223961	223962	6d_IP_vs_untagged_cer_reps_peak_250	-273	mild	1.47415	12.2542	111	37.6016	any	1	0	0	1	0	1
YDL133C-A	RPL41B	R-I	class_I	IG_788_genes-complement	divergent	chr04	222052	222053	6d_IP_vs_untagged_cer_reps_peak_249	-231	strong	3.46892	208.299	2061	70.626	any	1	1	1	1	0	1
YDL133W	SRF1	R-II	class_III	IG_788_genes-complement	divergent	chr04	222052	222053	6d_IP_vs_untagged_cer_reps_peak_249	-243	strong	3.46892	208.299	2061	70.626	any	1	0	0	1	0	1
YDL134C	PPH21	R-II	class_III	IG_787_genes-complement	tandem	chr04	221280	221281	6d_IP_vs_untagged_cer_reps_peak_248	-466	mild	1.5568	16.1221	149	38.1112	any	1	0	0	1	0	1
YDL135C	RDI1	R-III	class_IV	IG_786_genes-complement	tandem						no summit upstream				36.9288	none	1	0	0	1	0	1
YDL136W	RPL35B	R-II	class_IV	IG_784_genes-complement	tandem	chr04	217396	217397	6d_IP_vs_untagged_cer_reps_peak_247	-159	strong	3.19553	171.581	1695	74.4088	any	1	0	0	1	0	1
YDL137W	ARF2	R-II	class_III	IG_783_genes-complement	tandem	chr04	215985	215986	6d_IP_vs_untagged_cer_reps_peak_246	-76	mild	1.70621	24.541	232	42.1343	any	1	0	0	1	0	1
YDL138W	RGT2	R-II	class_IV	IG_782_genes-complement	divergent	chr04	212942	212943	6d_IP_vs_untagged_cer_reps_peak_245	-288	strong	2.99844	146.45	1445	49.1016	any	1	0	0	1	0	1
YDL138W	RGT2	R-II	class_IV	IG_782_genes-complement	divergent	chr04	212270	212271	6d_IP_vs_untagged_cer_reps_peak_244	-960	mild	1.41057	9.63864	85	49.1016	any	1	0	0	1	0	1
YDL139C	SCM3	R-III	class_IV	IG_782_genes-complement	divergent	chr04	212942	212943	6d_IP_vs_untagged_cer_reps_peak_245	-862	strong	2.99844	146.45	1445	49.1016	any	0	0	0	0	1	0
YDL139C	SCM3	R-III	class_IV	IG_782_genes-complement	divergent	chr04	212270	212271	6d_IP_vs_untagged_cer_reps_peak_244	-190	mild	1.41057	9.63864	85	49.1016	any	0	0	0	0	1	0
YDL140C	RPO21	RØ	class_III	IG_781_genes-complement	tandem	chr04	211122	211123	6d_IP_vs_untagged_cer_reps_peak_243	-485	mild	1.6172	19.3871	181	33.592	any	1	0	0	1	0	1
YDL141W	BPL1	R-III	class_IV	IG_779_genes-complement	divergent						no summit upstream				26.2245	none	0	0	0	1	0	1
YDL142C	CRD1	R-III	class_IV	IG_779_genes-complement	divergent						no summit upstream				26.2245	none	1	0	0	1	0	1
YDL143W	CCT4	R-II	class_IV	IG_777_genes-complement	divergent						no summit upstream				30.8626	none	1	0	0	1	0	1
YDL144C		R-III	class_IV	IG_777_genes-complement	divergent						no summit upstream				30.8626	none	1	0	0	1	0	1
YDL145C	COP1	R-II	class_IV	IG_776_genes-complement	tandem						no summit upstream				28.435	none	1	0	0	1	0	1
YDL146W	LDB17	R-III	class_IV	IG_774_genes-complement	tandem						no summit upstream				28.7898	none	0	0	0	0	1	0
YDL147W	RPN5	R-II	class_III	IG_773_genes-complement	divergent	chr04	190862	190863	6d_IP_vs_untagged_cer_reps_peak_241	-8	mild	1.5409	15.3483	141	36.4271	any	1	0	0	1	0	1
YDL148C	NOP14	R-II	class_IV	IG_773_genes-complement	divergent	chr04	190862	190863	6d_IP_vs_untagged_cer_reps_peak_241	-244	mild	1.5409	15.3483	141	36.4271	any	0	0	0	1	0	1
YDL149W	ATG9	R-II	class_III	IG_771_genes-complement	tandem	chr04	184875	184876	6d_IP_vs_untagged_cer_reps_peak_240	-12	mild	1.51388	14.0357	128	37.7312	any	1	0	0	0	0	1
YDL154W	MSH5	R-III	class_IV	IG_768_genes-complement	tandem						no summit upstream				18.9781	none	0	0	0	0	1	0
YDL155W	CLB3	R-II	class_IV	IG_767_genes-complement	tandem						no summit upstream				35.4956	none	0	0	0	1	0	1
YDL156W	CMR-I	R-III	class_IV	IG_766_genes-complement	divergent	chr04	174680	174681	6d_IP_vs_untagged_cer_reps_peak_239	-153	mild	1.38146	8.89725	78	39.2988	any	0	0	0	1	0	1
YDL157C		R-III	class_IV	IG_766_genes-complement	divergent	chr04	174680	174681	6d_IP_vs_untagged_cer_reps_peak_239	-62	mild	1.38146	8.89725	78	39.2988	any	0	0	0	1	0	1
YDL158C		R-III	class_III	IG_765_genes-complement	tandem						no summit upstream				19.5041	none	1	0	0	1	0	1
YDL159W	STE7	R-III	class_III	IG_764_genes-complement	tandem	chr04	172415	172416	6d_IP_vs_untagged_cer_reps_peak_238	-17	mild	1.73005	25.9718	246	55.7576	any	1	0	0	1	0	1
YDL159W-A		R-III	class_I	IG_763_genes-complement	divergent						no summit upstream				40.4836	none	1	0	1	1	0	1
YDL160C	DHH1	RØ	class_III	IG_763_genes-complement	divergent						no summit upstream				40.4836	none	1	0	0	1	0	1
YDL160C-A	MHF2	R-I	class_IV	IG_762_genes-complement	tandem	chr04	169637	169638	6d_IP_vs_untagged_cer_reps_peak_234	-5	mild	1.56634	16.7137	155	40.2043	any	1	0	0	1	0	1
YDL160C-A	MHF2	R-I	class_IV	IG_762_genes-complement	tandem	chr04	170043	170044	6d_IP_vs_untagged_cer_reps_peak_235	-411	mild	1.55203	15.927	147	40.2043	any	1	0	0	1	0	1
YDL165W	CDC36	R-III	class_IV	IG_758_genes-complement	divergent						no summit upstream				26.6034	none	0	0	0	1	0	1
YDL166C	FAP7	R-III	class_IV	IG_758_genes-complement	divergent						no summit upstream				26.6034	none	0	0	0	1	0	1
YDL167C	NRP1	R-II	class_IV	IG_757_genes-complement	tandem						no summit upstream				25.8177	none	0	0	0	1	0	1
YDL168W	SFA1	R-II	class_III	IG_755_genes-complement	divergent	chr04	159387	159388	6d_IP_vs_untagged_cer_reps_peak_232	-167	mild	1.82542	32.039	306	51.0596	any	1	0	0	1	0	1
YDL169C	UGX2	R-III	class_III	IG_755_genes-complement	divergent	chr04	159387	159388	6d_IP_vs_untagged_cer_reps_peak_232	-628	mild	1.82542	32.039	306	51.0596	any	1	0	0	0	0	1
YDL170W	UGA3	R-II	class_IV	IG_753_genes-complement	divergent	chr04	156145	156146	6d_IP_vs_untagged_cer_reps_peak_230	-150	strong	4.3018	334.655	3321	78.5294	any	1	0	0	0	0	1
YDL171C	GLT1	R-II	class_III	IG_753_genes-complement	divergent	chr04	156145	156146	6d_IP_vs_untagged_cer_reps_peak_230	-467	strong	4.3018	334.655	3321	78.5294	any	0	0	0	1	0	1
YDL172C		R-III	class_III	IG_752_genes-complement	tandem						no summit upstream				17.6561	none	1	0	0	1	0	1
YDL173W	PAR-III2	R-III	class_III	IG_751_genes-complement	divergent	chr04	147903	147904	6d_IP_vs_untagged_cer_reps_peak_229	-246	mild	1.69667	23.8388	225	44.8668	any	1	0	0	1	0	1
YDL174C	DLD1	R-II	class_III	IG_751_genes-complement	divergent	chr04	147903	147904	6d_IP_vs_untagged_cer_reps_peak_229	-287	mild	1.69667	23.8388	225	44.8668	any	1	0	0	1	0	1
YDL175C	AIR-II	R-III	class_IV	IG_750_genes-complement	tandem						no summit upstream				33.5776	none	1	0	0	1	0	1
YDL176W		R-III	class_III	IG_748_genes-complement	divergent						no summit upstream				35.2073	none	0	0	0	1	0	1
YDL177C		R-III	class_IV	IG_748_genes-complement	divergent						no summit upstream				35.2073	none	0	0	0	1	0	1
YDL178W	DLD2	R-III	class_IV	IG_746_genes-complement	tandem						no summit upstream				20.9762	none	1	0	0	1	0	1
YDL179W	PCL9	R-III	class_IV	IG_745_genes-complement	tandem						no summit upstream				28.7818	none	0	0	0	1	0	1
YDL180W		R-II	class_III	IG_744_genes-complement	tandem						no summit upstream				54.8675	none	1	0	0	1	0	1
YDL181W	INH1	R-II	class_I	IG_743_genes-complement	tandem						no summit upstream				92.9025	none	1	0	1	1	0	1
YDL182W	LYS20	R-I	class_I	IG_742_genes-complement	divergent	chr04	132925	132926	6d_IP_vs_untagged_cer_reps_peak_228	-477	strong	6.07882	660.617	6575	92.9531	any	1	0	1	1	0	1
YDL183C		R-II	class_III	IG_742_genes-complement	divergent	chr04	132925	132926	6d_IP_vs_untagged_cer_reps_peak_228	-1021	strong	6.07882	660.617	6575	92.9531	any	1	0	0	0	0	1
YDL184C	RPL41A	R-II	class_I	IG_741_genes-complement	tandem	chr04	130693	130694	6d_IP_vs_untagged_cer_reps_peak_227	-186	strong	3.55316	220.341	2181	88.919	any	1	0	1	1	0	1
YDL188C	PPH22	R-III	class_IV	IG_738_genes-complement	tandem						no summit upstream				34.615	none	1	0	0	1	0	1
YDL189W	RBS1	R-III	class_IV	IG_736_genes-complement	divergent						no summit upstream				24.5435	none	0	0	0	1	0	1
YDL190C	UFD2	R-III	class_III	IG_736_genes-complement	divergent						no summit upstream				24.5435	none	1	0	0	1	0	1
YDL191W	RPL35A	R-II	class_IV	IG_734_genes-complement	tandem	chr04	117487	117488	6d_IP_vs_untagged_cer_reps_peak_225	-140	mild	2.23232	64.4979	629	39.8932	any	1	0	0	1	0	1
YDL192W	ARF1	R-I	class_IV	IG_733_genes-complement	tandem	chr04	116174	116175	6d_IP_vs_untagged_cer_reps_peak_224	-100	mild	1.58064	17.3149	161	39.6719	any	1	0	0	1	0	1
YDL193W	NUS1	R-II	class_III	IG_732_genes-complement	tandem						no summit upstream				34.8601	none	1	0	0	1	0	1
YDL194W	SNF3	R-III	class_III	IG_731_genes-complement	tandem						no summit upstream				30.3041	none	1	0	0	0	0	1
YDL195W	SEC31	R-III	class_III	IG_730_genes-complement	tandem						no summit upstream				31.1935	none	1	0	0	1	0	1
YDL196W		R-III	class_IV	IG_729_genes-complement	divergent						no summit upstream				31.9884	none	1	0	0	1	0	1
YDL197C	ASF2	R-III	class_III	IG_729_genes-complement	divergent						no summit upstream				31.9884	none	1	0	0	0	0	1
YDL198C	GGC1	R-III	class_IV	IG_728_genes-complement	tandem						no summit upstream				38.7254	none	1	0	0	1	0	1
YDL199C		R-III	class_III	IG_727_genes-complement	tandem						no summit upstream				28.3465	none	0	0	0	0	1	0
YDL200C	MGT1	R-II	class_III	IG_726_genes-complement	tandem						no summit upstream				35.7335	none	1	0	0	1	0	1
YDL201W	TRM8	R-II	class_IV	IG_724_genes-complement	tandem						no summit upstream				26.9761	none	1	0	0	1	0	1
YDL202W	MRPL11	R-III	class_IV	IG_723_genes-complement	divergent	chr04	98305	98306	6d_IP_vs_untagged_cer_reps_peak_223	-119	strong	2.52478	92.8853	911	54.5543	any	0	0	0	1	0	1
YDL203C	ACK1	R-II	class_III	IG_723_genes-complement	divergent	chr04	98305	98306	6d_IP_vs_untagged_cer_reps_peak_223	-246	strong	2.52478	92.8853	911	54.5543	any	1	0	0	1	0	1
YDL204W	RTN2	RØ	class_III	IG_721_genes-complement	divergent	chr04	94196	94197	6d_IP_vs_untagged_cer_reps_peak_222	-393	mild	1.64104	20.6801	194	39.6391	any	1	1	0	0	0	1
YDL205C	HEM3	R-II	class_IV	IG_721_genes-complement	divergent	chr04	94196	94197	6d_IP_vs_untagged_cer_reps_peak_222	-342	mild	1.64104	20.6801	194	39.6391	any	1	0	0	1	0	1
YDL206W		R-III	class_III	IG_719_genes-complement	tandem						no summit upstream				30.2701	none	1	0	0	0	0	1
YDL207W	GLE1	R-III	class_IV	IG_718_genes-complement	tandem						no summit upstream				28.7082	none	1	0	0	1	0	1
YDL208W	NHP2	R-I	class_IV	IG_717_genes-complement	divergent						no summit upstream				35.8357	none	1	0	0	1	0	1
YDL209C	CWC2	R-II	class_IV	IG_717_genes-complement	divergent						no summit upstream				35.8357	none	0	0	0	1	0	1
YDL210W	UGA4	R-III	class_IV	IG_715_genes-complement	divergent	chr04	83532	83533	6d_IP_vs_untagged_cer_reps_peak_220	-673	mild	1.7523	27.1908	258	25.023	any	0	0	0	0	1	0
YDL211C		R-III	class_IV	IG_715_genes-complement	divergent	chr04	83532	83533	6d_IP_vs_untagged_cer_reps_peak_220	-3048	mild	1.7523	27.1908	258	25.023	any	0	0	0	1	0	1
YDL212W	SHR-III	R-II	class_III	IG_713_genes-complement	divergent						no summit upstream				38.4049	none	1	0	0	1	0	1
YDL213C	NOP6	R-II	class_IV	IG_713_genes-complement	divergent						no summit upstream				38.4049	none	1	0	0	1	0	1
YDL214C	PRR-II	R-II	class_III	IG_712_genes-complement	tandem	chr04	76947	76948	6d_IP_vs_untagged_cer_reps_peak_218	-337	strong	4.73572	407.539	4049	103.469	any	1	0	0	0	0	1
YDL215C	GDH2	RØ	class_III	IG_711_genes-complement	tandem	chr04	74196	74197	6d_IP_vs_untagged_cer_reps_peak_217	-220	mild	2.2959	70.2153	686	60.7416	any	1	0	0	1	0	1
YDL216C	RRI1	R-III	class_IV	IG_710_genes-complement	tandem						no summit upstream				36.4861	none	1	0	0	0	0	1
YDL217C	TIM22	R-III	class_IV	IG_709_genes-complement	tandem						no summit upstream				27.6019	none	1	0	0	1	0	1
YDL218W		R-II	class_III	IG_707_genes-complement	tandem						no summit upstream				32.3394	none	1	0	0	0	0	1
YDL219W	DTD1	R-III	class_IV	IG_706_genes-complement	divergent						no summit upstream				22.6402	none	1	0	0	0	0	1
YDL220C	CDC13	R-III	class_IV	IG_706_genes-complement	divergent						no summit upstream				22.6402	none	0	0	0	0	1	0
YDL221W		R-III	class_II	IG_705_genes-complement	divergent						no summit upstream				72.1876	none	1	0	1	0	0	1
YDL222C	FMP45	RØ	class_I	IG_705_genes-complement	divergent						no summit upstream				72.1876	none	1	1	1	0	0	1
YDL223C	HBT1	RØ	class_III	IG_704_genes-complement	tandem						no summit upstream				54.0886	none	1	1	0	0	0	1
YDL224C	WHI4	R-II	class_III	IG_703_genes-complement	tandem	chr04	56913	56914	6d_IP_vs_untagged_cer_reps_peak_214	-456	mild	1.7984	30.2135	288	38.3887	any	1	0	0	1	0	1
YDL225W	SHS1	R-II	class_IV	IG_701_genes-complement	divergent						no summit upstream				28.5962	none	0	0	0	1	0	1
YDL226C	GCS1	R-III	class_IV	IG_701_genes-complement	divergent						no summit upstream				28.5962	none	0	0	0	1	0	1
YDL227C	HO	R-III	class_IV	IG_700_genes-complement	tandem						no summit upstream				21.2231	none	0	0	0	1	0	1
YDL228C		R-I	class_III	IG_699_genes-complement	tandem						no summit upstream				25.3578	none	1	0	0	1	0	1
YDL229W	SSB1	R-I	class_III	IG_698_genes-complement	tandem	chr04	43792	43793	6d_IP_vs_untagged_cer_reps_peak_213	-242	mild	1.60766	18.7545	175	41.4167	any	1	0	0	1	0	1
YDL230W	PTP1	R-III	class_IV	IG_697_genes-complement	divergent	chr04	42508	42509	6d_IP_vs_untagged_cer_reps_peak_212	-151	strong	2.91261	136.056	1341	65.9317	any	0	0	0	0	1	0
YDL231C	BRE4	R-II	class_III	IG_697_genes-complement	divergent	chr04	42508	42509	6d_IP_vs_untagged_cer_reps_peak_212	-155	strong	2.91261	136.056	1341	65.9317	any	1	0	0	1	0	1
YDL232W	OST4	R-III	class_IV	IG_695_genes-complement	tandem	chr04	38330	38331	6d_IP_vs_untagged_cer_reps_peak_211	-134	mild	1.90489	37.7835	363	52.3957	any	1	0	0	1	0	1
YDL233W	MFG1	R-III	class_III	IG_694_genes-complement	divergent	chr04	36491	36492	6d_IP_vs_untagged_cer_reps_peak_210	-274	mild	2.2959	70.2153	686	54.3365	any	0	0	0	0	1	0
YDL234C	GYP7	R-II	class_III	IG_694_genes-complement	divergent	chr04	36491	36492	6d_IP_vs_untagged_cer_reps_peak_210	71	mild	2.2959	70.2153	686	54.3365	any	1	0	0	1	0	1
YDL235C	YPD1	R-III	class_IV	IG_693_genes-complement	tandem						no summit upstream				45.3228	none	1	0	0	1	0	1
YDL236W	PHO13	R-II	class_IV	IG_691_genes-complement	tandem						no summit upstream				29.4656	none	0	0	0	1	0	1
YDL237W	AIM6	R-II	class_IV	IG_690_genes-complement	divergent						no summit upstream				32.6351	none	1	0	0	0	0	1
YDL238C	GUD1	R-III	class_IV	IG_690_genes-complement	divergent						no summit upstream				32.6351	none	1	0	0	0	0	1
YDL239C	ADY3	R-III	class_IV	IG_689_genes-complement	tandem						no summit upstream				17.8229	none	0	0	0	0	1	0
YDL240C-A		R-III	class_IV	IG_687_genes-complement	divergent						no summit upstream				30.5549	none	1	0	0	1	0	1
YDL240W	LRG1	R-III	class_IV	IG_687_genes-complement	divergent						no summit upstream				30.5549	none	0	0	0	1	0	1
YDL241W		R-III	class_IV	IG_685_genes-complement	tandem						no summit upstream				24.9772	none	0	0	0	1	0	1
YDL242W		R-III	class_IV	IG_684_genes-complement	divergent						no summit upstream				13.2935	none	0	0	0	1	0	1
YDL243C	AAD4	R-III	class_IV	IG_684_genes-complement	divergent						no summit upstream				13.2935	none	0	0	0	0	1	0
YDL244W	THI13	R-III	class_IV	IG_682_genes-complement	divergent	chr04	13866	13867	6d_IP_vs_untagged_cer_reps_peak_209	-2222	strong	3.85675	264.853	2625	32.4838	any	0	0	0	0	1	0
YDL245C	HXT15	R-III	class_IV	IG_682_genes-complement	divergent	chr04	13866	13867	6d_IP_vs_untagged_cer_reps_peak_209	-506	strong	3.85675	264.853	2625	32.4838	any	0	0	0	0	1	0
YDL246C	SOR-II	R-III	class_IV	IG_681_genes-complement	tandem	chr04	10257	10258	6d_IP_vs_untagged_cer_reps_peak_208	-501	mild	1.94463	40.6565	392	28.9344	any	0	0	0	0	1	0
YDL247W	MPH2	R-III	class_IV	IG_679_genes-complement	tandem						no summit upstream				18.2012	none	0	0	0	0	1	0
YDL247W-A		R-III	class_IV	IG_678_genes-complement	tandem						no summit upstream				14.6558	none	1	0	0	1	0	1
YDR001C	NTH1	R-II	class_III	IG_910_genes-complement	divergent	chr04	452853	452854	6d_IP_vs_untagged_cer_reps_peak_296	-301	mild	1.82065	31.7755	304	49.3329	any	1	0	0	1	0	1
YDR002W	YRB1	R-I	class_III	IG_910_genes-complement	divergent	chr04	452853	452854	6d_IP_vs_untagged_cer_reps_peak_296	-150	mild	1.82065	31.7755	304	49.3329	any	1	0	0	1	0	1
YDR003W	RCR-II	R-III	class_III	IG_911_genes-complement	tandem	chr04	453899	453900	6d_IP_vs_untagged_cer_reps_peak_297	-174	mild	1.76979	28.4337	271	47.1152	any	1	0	0	1	0	1
YDR003W-A		R-II	class_III	IG_912_genes-complement	tandem						no summit upstream				36.2072	none	1	0	0	1	0	1
YDR004W	RAD57	R-II	class_III	IG_913_genes-complement	tandem	chr04	455151	455152	6d_IP_vs_untagged_cer_reps_peak_298	-18	mild	1.50753	13.8526	126	43.5197	any	1	0	0	1	0	1
YDR005C	MAF1	R-II	class_III	IG_915_genes-complement	tandem	chr04	458363	458364	6d_IP_vs_untagged_cer_reps_peak_299	-138	mild	1.48845	12.9534	118	40.9689	any	1	0	0	1	0	1
YDR006C	SOK1	R-II	class_III	IG_916_genes-complement	divergent	chr04	461367	461368	6d_IP_vs_untagged_cer_reps_peak_300	-28	mild	1.89377	36.9386	355	55.5262	any	1	0	0	1	0	1
YDR007W	TRP1	R-II	class_IV	IG_916_genes-complement	divergent	chr04	461367	461368	6d_IP_vs_untagged_cer_reps_peak_300	-437	mild	1.89377	36.9386	355	55.5262	any	1	0	0	1	0	1
YDR008C		R-II	class_IV	IG_917_genes-complement	divergent	chr04	463165	463166	6d_IP_vs_untagged_cer_reps_peak_302	-458	mild	2.14808	56.9529	554	45.696	any	1	0	0	1	0	1
YDR009W	GAL3	R-III	class_IV	IG_917_genes-complement	divergent	chr04	463165	463166	6d_IP_vs_untagged_cer_reps_peak_302	-162	mild	2.14808	56.9529	554	45.696	any	1	0	0	0	0	1
YDR010C		R-III	class_II	IG_919_genes-complement	divergent						no summit upstream				91.5719	none	1	0	1	0	0	1
YDR011W	SNQ2	R-II	class_III	IG_919_genes-complement	divergent						no summit upstream				91.5719	none	1	0	0	1	0	1
YDR012W	RPL4B	R-II	class_III	IG_920_genes-complement	tandem						no summit upstream				31.3961	none	1	0	0	1	0	1
YDR013W	PSF1	R-II	class_IV	IG_921_genes-complement	tandem						no summit upstream				34.9179	none	0	0	0	1	0	1
YDR014W	RAD61	R-III	class_IV	IG_922_genes-complement	tandem						no summit upstream				20.5373	none	0	0	0	0	1	0
YDR014W-A	HED1	R-III	class_IV	IG_923_genes-complement	tandem						no summit upstream				19.0148	none	0	0	0	0	1	0
YDR016C	DAD1	R-III	class_IV	IG_925_genes-complement	tandem	chr04	478908	478909	6d_IP_vs_untagged_cer_reps_peak_304	-124	mild	1.48686	12.7769	116	39.7884	any	1	0	0	1	0	1
YDR017C	KCS1	R-II	class_III	IG_926_genes-complement	tandem	chr04	482490	482491	6d_IP_vs_untagged_cer_reps_peak_306	-132	mild	1.51229	14.0357	128	39.74	any	1	0	0	1	0	1
YDR018C		R-III	class_IV	IG_927_genes-complement	tandem						no summit upstream				29.5267	none	1	0	0	0	0	1
YDR019C	GCV1	R-III	class_IV	IG_928_genes-complement	tandem						no summit upstream				23.1424	none	1	0	0	0	0	1
YDR020C	DAS2	R-III	class_IV	IG_929_genes-complement	divergent						no summit upstream				23.6885	none	1	0	0	1	0	1
YDR021W	FAL1	R-III	class_IV	IG_929_genes-complement	divergent						no summit upstream				23.6885	none	0	0	0	1	0	1
YDR022C		R-III	class_III	IG_931_genes-complement	divergent	chr04	488916	488917	6d_IP_vs_untagged_cer_reps_peak_307	-238	mild	1.80536	30.7995	294	42.0832	any	0	0	0	1	0	1
YDR023W	SES1	R-II	class_IV	IG_931_genes-complement	divergent	chr04	488916	488917	6d_IP_vs_untagged_cer_reps_peak_307	-561	mild	1.80536	30.7995	294	42.0832	any	0	0	0	1	0	1
YDR024W	FYV1	R-III	class_IV	IG_932_genes-complement	tandem						no summit upstream				21.0664	none	0	0	0	1	0	1
YDR025W	RPS11A	R-II	class_IV	IG_933_genes-complement	tandem						no summit upstream				33.4866	none	1	0	0	1	0	1
YDR026C	NSI1	R-II	class_IV	IG_935_genes-complement	tandem						no summit upstream				27.6838	none	1	0	0	1	0	1
YDR027C	VPS54	R-III	class_IV	IG_936_genes-complement	tandem						no summit upstream				35.8524	none	1	0	0	1	0	1
YDR028C	REG1	RØ	class_III	IG_937_genes-complement	divergent						no summit upstream				25.4406	none	1	0	0	1	0	1
YDR029W		R-II	class_III	IG_937_genes-complement	divergent						no summit upstream				25.4406	none	1	0	0	1	0	1
YDR030C	RAD28	R-III	class_IV	IG_939_genes-complement	divergent						no summit upstream				31.8649	none	1	0	0	0	0	1
YDR031W	MIX14	R-III	class_IV	IG_939_genes-complement	divergent						no summit upstream				31.8649	none	1	0	0	0	0	1
YDR032C	PST2	R-III	class_IV	IG_941_genes-complement	divergent	chr04	507568	507569	6d_IP_vs_untagged_cer_reps_peak_311	-2803	mild	1.4662	11.9113	107	31.6412	any	1	0	0	0	0	1
YDR032C	PST2	R-III	class_IV	IG_941_genes-complement	divergent	chr04	506200	506201	6d_IP_vs_untagged_cer_reps_peak_310	-1435	mild	1.8127	31.2511	299	31.6412	any	1	0	0	0	0	1
YDR033W	MRH1	R-I	class_IV	IG_941_genes-complement	divergent	chr04	506200	506201	6d_IP_vs_untagged_cer_reps_peak_310	-1837	mild	1.8127	31.2511	299	31.6412	any	1	0	0	1	0	1
YDR033W	MRH1	R-I	class_IV	IG_941_genes-complement	divergent	chr04	507568	507569	6d_IP_vs_untagged_cer_reps_peak_311	-469	mild	1.4662	11.9113	107	31.6412	any	1	0	0	1	0	1
YDR034C	LYS14	R-II	class_III	IG_943_genes-complement	tandem	chr04	519778	519779	6d_IP_vs_untagged_cer_reps_peak_313	-7540	mild	1.78409	29.4451	281	25.5498	any	1	0	0	1	0	1
YDR034C	LYS14	R-II	class_III	IG_943_genes-complement	tandem	chr04	512351	512352	6d_IP_vs_untagged_cer_reps_peak_312	-113	mild	2.02728	46.9692	455	25.5498	any	1	0	0	1	0	1
YDR034C-A		R-III	class_IV	IG_944_genes-complement	divergent	chr04	521062	521063	6d_IP_vs_untagged_cer_reps_peak_314	-271	mild	2.03205	47.2791	458	50.7391	any	1	0	0	0	0	1
YDR034W-B		R-II	class_I	IG_944_genes-complement	divergent	chr04	521062	521063	6d_IP_vs_untagged_cer_reps_peak_314	-216	mild	2.03205	47.2791	458	50.7391	any	1	0	1	0	0	1
YDR035W	ARO3	R-I	class_III	IG_945_genes-complement	tandem						no summit upstream				54.396	none	1	0	0	1	0	1
YDR036C	EHD3	R-II	class_IV	IG_947_genes-complement	divergent	chr04	525195	525196	6d_IP_vs_untagged_cer_reps_peak_315	-425	mild	1.62832	20.029	187	40.8694	any	1	0	0	1	0	1
YDR037W	KRS1	R-I	class_IV	IG_947_genes-complement	divergent	chr04	525195	525196	6d_IP_vs_untagged_cer_reps_peak_315	-205	mild	1.62832	20.029	187	40.8694	any	1	0	0	1	0	1
YDR038C	ENA5	R-II	class_III	IG_949_genes-complement	tandem						no summit upstream				20.6996	none	1	0	0	0	0	1
YDR039C	ENA2	R-I	class_III	IG_950_genes-complement	tandem						no summit upstream				20.9965	none	1	0	0	0	0	1
YDR040C	ENA1	RØ	class_III	IG_951_genes-complement	divergent	chr04	539217	539218	6d_IP_vs_untagged_cer_reps_peak_316	-750	strong	6.27273	700.238	6971	127.185	any	1	0	0	0	0	1
YDR041W	RSM10	R-II	class_III	IG_951_genes-complement	divergent	chr04	539217	539218	6d_IP_vs_untagged_cer_reps_peak_316	-560	strong	6.27273	700.238	6971	127.185	any	1	0	0	1	0	1
YDR042C		R-II	class_IV	IG_953_genes-complement	tandem	chr04	542404	542405	6d_IP_vs_untagged_cer_reps_peak_317	-1129	strong	3.88695	268.982	2666	60.202	any	1	0	0	1	0	1
YDR043C	NRG1	R-I	class_I	IG_954_genes-complement	divergent	chr04	546304	546305	6d_IP_vs_untagged_cer_reps_peak_318	-2816	mild	1.95734	41.5354	401	67.0475	any	1	0	1	1	0	1
YDR044W	HEM13	R-II	class_IV	IG_954_genes-complement	divergent	chr04	546304	546305	6d_IP_vs_untagged_cer_reps_peak_318	-268	mild	1.95734	41.5354	401	67.0475	any	0	0	0	1	0	1
YDR045C	RPC11	R-II	class_IV	IG_956_genes-complement	tandem						no summit upstream				29.6414	none	0	0	0	1	0	1
YDR046C	BAP3	R-II	class_IV	IG_957_genes-complement	divergent	chr04	551009	551010	6d_IP_vs_untagged_cer_reps_peak_319	-343	strong	2.65353	106.594	1048	45.0673	any	1	0	0	1	0	1
YDR047W	HEM12	R-III	class_IV	IG_957_genes-complement	divergent	chr04	551009	551010	6d_IP_vs_untagged_cer_reps_peak_319	-734	strong	2.65353	106.594	1048	45.0673	any	0	0	0	1	0	1
YDR050C	TPI1	R-III	class_IV	IG_960_genes-complement	tandem	chr04	556777	556778	6d_IP_vs_untagged_cer_reps_peak_320	-276	mild	1.61402	19.1752	179	36.7766	any	1	0	0	1	0	1
YDR051C	DET1	R-III	class_IV	IG_961_genes-complement	tandem						no summit upstream				27.1725	none	1	0	0	1	0	1
YDR054C	CDC34	R-I	class_III	IG_963_genes-complement	divergent	chr04	562818	562819	6d_IP_vs_untagged_cer_reps_peak_322	-368	strong	4.9503	445.31	4426	84.7506	any	1	0	0	1	0	1
YDR055W	PST1	R-I	class_III	IG_963_genes-complement	divergent	chr04	562818	562819	6d_IP_vs_untagged_cer_reps_peak_322	-646	strong	4.9503	445.31	4426	84.7506	any	1	0	0	1	0	1
YDR056C	EMC10	R-II	class_III	IG_965_genes-complement	divergent						no summit upstream				31.1673	none	1	0	0	1	0	1
YDR057W	YOS9	R-III	class_IV	IG_965_genes-complement	divergent						no summit upstream				31.1673	none	0	0	0	0	1	0
YDR058C	TGL2	R-III	class_IV	IG_967_genes-complement	tandem	chr04	568960	568961	6d_IP_vs_untagged_cer_reps_peak_323	-220	strong	3.78205	253.177	2509	79.8647	any	0	0	0	0	1	0
YDR059C	UBC5	R-II	class_III	IG_968_genes-complement	divergent						no summit upstream				37.8121	none	1	0	0	0	0	1
YDR060W	MAK21	R-I	class_IV	IG_968_genes-complement	divergent						no summit upstream				37.8121	none	0	0	0	1	0	1
YDR061W		R-III	class_IV	IG_969_genes-complement	tandem	chr04	573928	573929	6d_IP_vs_untagged_cer_reps_peak_325	-194	strong	2.54544	94.9164	932	56.2475	any	1	0	0	1	0	1
YDR062W	LCB2	R-II	class_IV	IG_970_genes-complement	tandem						no summit upstream				33.1255	none	1	0	0	1	0	1
YDR063W	AIM7	R-III	class_IV	IG_971_genes-complement	tandem						no summit upstream				25.2658	none	1	0	0	1	0	1
YDR064W	RPS13	R-I	class_IV	IG_972_genes-complement	tandem	chr04	579334	579335	6d_IP_vs_untagged_cer_reps_peak_326	-90	strong	2.45485	85.7124	840	61.2165	any	1	0	0	1	0	1
YDR065W	RRG1	R-III	class_IV	IG_973_genes-complement	tandem						no summit upstream				21.5928	none	1	0	0	1	0	1
YDR066C	RTR-II	R-III	class_IV	IG_975_genes-complement	tandem						no summit upstream				18.5577	none	1	0	0	1	0	1
YDR067C	OCA6	R-II	class_IV	IG_976_genes-complement	divergent						no summit upstream				29.3097	none	1	0	0	1	0	1
YDR068W	DOS2	R-II	class_IV	IG_976_genes-complement	divergent						no summit upstream				29.3097	none	1	0	0	0	0	1
YDR069C	DOA4	R-II	class_III	IG_978_genes-complement	tandem	chr04	587751	587752	6d_IP_vs_untagged_cer_reps_peak_327	72	mild	1.78886	29.7003	283	46.9527	any	1	0	0	0	0	1
YDR070C	FMP16	R-III	class_III	IG_979_genes-complement	tandem						no summit upstream				29.3694	none	1	1	0	1	0	1
YDR071C	PAA1	R-II	class_IV	IG_980_genes-complement	tandem	chr04	589516	589517	6d_IP_vs_untagged_cer_reps_peak_328	-44	mild	1.37878	8.29801	72	41.9648	any	1	0	0	1	0	1
YDR072C	IPT1	R-II	class_IV	IG_981_genes-complement	divergent	chr04	591778	591779	6d_IP_vs_untagged_cer_reps_peak_330	-304	strong	5.92464	630.194	6271	100.792	any	1	0	0	1	0	1
YDR073W	SNF11	R-II	class_III	IG_981_genes-complement	divergent	chr04	591778	591779	6d_IP_vs_untagged_cer_reps_peak_330	-579	strong	5.92464	630.194	6271	100.792	any	1	0	0	1	0	1
YDR074W	TPS2	R-II	class_III	IG_982_genes-complement	tandem	chr04	593571	593572	6d_IP_vs_untagged_cer_reps_peak_331	-224	strong	3.40216	199.155	1970	71.5368	any	1	0	0	1	0	1
YDR075W	PPH3	R-II	class_IV	IG_983_genes-complement	tandem						no summit upstream				32.4207	none	1	0	0	1	0	1
YDR076W	RAD55	R-II	class_III	IG_984_genes-complement	tandem						no summit upstream				32.2741	none	1	0	0	1	0	1
YDR077W	SED1	RØ	class_I	IG_985_genes-complement	tandem						no summit upstream				89.9043	none	1	1	1	1	0	1
YDR078C	SHU2	R-II	class_IV	IG_987_genes-complement	divergent						no summit upstream				38.7659	none	1	0	0	1	0	1
YDR079C-A	TFB5	R-II	class_IV	IG_989_genes-complement	divergent						no summit upstream				25.482	none	1	0	0	1	0	1
YDR079W	PET100	R-II	class_IV	IG_987_genes-complement	divergent						no summit upstream				38.7659	none	1	0	0	1	0	1
YDR080W	VPS41	R-III	class_IV	IG_989_genes-complement	divergent						no summit upstream				25.482	none	0	0	0	0	1	0
YDR081C	PDC2	R-II	class_IV	IG_991_genes-complement	divergent						no summit upstream				32.4744	none	0	0	0	1	0	1
YDR082W	STN1	R-III	class_IV	IG_991_genes-complement	divergent						no summit upstream				32.4744	none	0	0	0	1	0	1
YDR083W	RRP8	R-II	class_IV	IG_992_genes-complement	tandem						no summit upstream				30.3644	none	1	0	0	1	0	1
YDR084C	TVP23	R-III	class_IV	IG_994_genes-complement	tandem						no summit upstream				26.2225	none	1	0	0	1	0	1
YDR085C	AFR-I	R-III	class_IV	IG_995_genes-complement	tandem	chr04	616549	616550	6d_IP_vs_untagged_cer_reps_peak_334	-299	mild	1.86256	40.4894	390	43.9182	any	1	0	0	1	0	1
YDR086C	SSS1	R-II	class_III	IG_996_genes-complement	tandem						no summit upstream				35.4005	none	1	0	0	1	0	1
YDR087C	RRP1	R-III	class_IV	IG_997_genes-complement	tandem						no summit upstream				35.6471	none	0	0	0	1	0	1
YDR088C	SLU7	R-III	class_III	IG_998_genes-complement	divergent	chr04	620107	620108	6d_IP_vs_untagged_cer_reps_peak_335	-346	mild	2.02887	46.9692	455	40.6841	any	0	0	0	0	1	0
YDR088C	SLU7	R-III	class_III	IG_998_genes-complement	divergent	chr04	621390	621391	6d_IP_vs_untagged_cer_reps_peak_336	-1629	strong	3.42601	202.366	2002	40.6841	any	0	0	0	0	1	0
YDR089W	VTC5	R-II	class_IV	IG_998_genes-complement	divergent	chr04	621390	621391	6d_IP_vs_untagged_cer_reps_peak_336	-640	strong	3.42601	202.366	2002	40.6841	any	1	0	0	1	0	1
YDR089W	VTC5	R-II	class_IV	IG_998_genes-complement	divergent	chr04	620107	620108	6d_IP_vs_untagged_cer_reps_peak_335	-1923	mild	2.02887	46.9692	455	40.6841	any	1	0	0	1	0	1
YDR090C		R-II	class_III	IG_1000_genes-complement	tandem	chr04	626239	626240	6d_IP_vs_untagged_cer_reps_peak_337	-163	mild	1.57269	16.9131	157	38.5241	any	1	0	0	1	0	1
YDR091C	RLI1	R-II	class_IV	IG_1001_genes-complement	divergent	chr04	628817	628818	6d_IP_vs_untagged_cer_reps_peak_338	-227	mild	1.59018	17.9256	167	36.527	any	0	0	0	1	0	1
YDR092W	UBC13	R-II	class_III	IG_1001_genes-complement	divergent	chr04	628817	628818	6d_IP_vs_untagged_cer_reps_peak_338	-1009	mild	1.59018	17.9256	167	36.527	any	1	0	0	1	0	1
YDR093W	DNF2	R-II	class_IV	IG_1002_genes-complement	tandem	chr04	630805	630806	6d_IP_vs_untagged_cer_reps_peak_339	-384	mild	1.8286	32.3035	309	40.3142	any	0	0	0	1	0	1
YDR095C		R-III	class_II	IG_1003_genes-complement	divergent						no summit upstream				59.6351	none	0	0	1	0	1	0
YDR096W	GIS1	RØ	class_III	IG_1003_genes-complement	divergent						no summit upstream				59.6351	none	1	0	0	1	0	1
YDR097C	MSH6	R-III	class_IV	IG_1005_genes-complement	tandem	chr04	644034	644035	6d_IP_vs_untagged_cer_reps_peak_341	-128	mild	1.50435	13.6705	125	40.4939	any	0	0	0	1	0	1
YDR098C	GRX3	R-III	class_IV	IG_1006_genes-complement	divergent	chr04	653293	653294	6d_IP_vs_untagged_cer_reps_peak_344	-8193	mild	1.59177	17.9256	167	22.927	any	0	0	0	1	0	1
YDR098C	GRX3	R-III	class_IV	IG_1006_genes-complement	divergent	chr04	645150	645151	6d_IP_vs_untagged_cer_reps_peak_342	-50	mild	1.55839	16.3182	151	22.927	any	0	0	0	1	0	1
YDR098C	GRX3	R-III	class_IV	IG_1006_genes-complement	divergent	chr04	652476	652477	6d_IP_vs_untagged_cer_reps_peak_343	-7376	mild	1.70144	24.0718	227	22.927	any	0	0	0	1	0	1
YDR099W	BMH2	R-II	class_III	IG_1006_genes-complement	divergent	chr04	653293	653294	6d_IP_vs_untagged_cer_reps_peak_344	587	mild	1.59177	17.9256	167	22.927	any	1	0	0	1	0	1
YDR099W	BMH2	R-II	class_III	IG_1006_genes-complement	divergent	chr04	645150	645151	6d_IP_vs_untagged_cer_reps_peak_342	-7556	mild	1.55839	16.3182	151	22.927	any	1	0	0	1	0	1
YDR099W	BMH2	R-II	class_III	IG_1006_genes-complement	divergent	chr04	652476	652477	6d_IP_vs_untagged_cer_reps_peak_343	-230	mild	1.70144	24.0718	227	22.927	any	1	0	0	1	0	1
YDR-I00W	TVP15	R-III	class_IV	IG_1007_genes-complement	tandem	chr04	654854	654855	6d_IP_vs_untagged_cer_reps_peak_345	-124	mild	1.35812	7.59481	65	34.2101	any	1	0	0	1	0	1
YDR-I01C	ARX1	R-II	class_IV	IG_1009_genes-complement	tandem						no summit upstream				58.2762	none	0	0	0	1	0	1
YDR-I02C		R-III	class_IV	IG_1010_genes-complement	divergent						no summit upstream				34.5163	none	0	0	0	0	1	0
YDR-I03W	STE5	R-II	class_IV	IG_1010_genes-complement	divergent						no summit upstream				34.5163	none	0	0	0	1	0	1
YDR-I04C	SPO71	R-III	class_III	IG_1012_genes-complement	tandem						no summit upstream				27.5252	none	0	0	0	0	1	0
YDR-I05C	TMS1	R-III	class_III	IG_1013_genes-complement	divergent						no summit upstream				30.175	none	1	0	0	0	0	1
YDR-I06W	ARP10	R-III	class_IV	IG_1013_genes-complement	divergent						no summit upstream				30.175	none	1	0	0	0	0	1
YDR-I07C	TMN2	R-III	class_IV	IG_1015_genes-complement	divergent						no summit upstream				22.4772	none	0	0	0	1	0	1
YDR-I08W	TRS85	R-III	class_IV	IG_1015_genes-complement	divergent						no summit upstream				22.4772	none	0	0	0	0	1	0
YDR-I09C		R-III	class_IV	IG_1017_genes-complement	divergent						no summit upstream				25.754	none	0	0	0	0	1	0
YDR-I10W	FOB1	R-II	class_IV	IG_1017_genes-complement	divergent						no summit upstream				25.754	none	1	0	0	1	0	1
YDR-I13C	PDS1	R-III	class_IV	IG_1020_genes-complement	tandem	chr04	681881	681882	6d_IP_vs_untagged_cer_reps_peak_348	-174	mild	1.52501	14.5917	134	42.997	any	0	0	0	1	0	1
YDR-I16C	MRPL1	R-III	class_IV	IG_1022_genes-complement	tandem						no summit upstream				29.8381	none	1	0	0	1	0	1
YDR-I17C	TMA64	R-III	class_IV	IG_1023_genes-complement	divergent						no summit upstream				33.4742	none	0	0	0	0	1	0
YDR-I18W	APC4	R-III	class_IV	IG_1023_genes-complement	divergent						no summit upstream				33.4742	none	0	0	0	1	0	1
YDR-I19W	VBA4	R-II	class_IV	IG_1024_genes-complement	tandem						no summit upstream				34.7394	none	0	0	0	1	0	1
YDR-I19W-A	COX26	RØ	class_I	IG_1025_genes-complement	tandem	chr04	690740	690741	6d_IP_vs_untagged_cer_reps_peak_349	-228	strong	2.83949	127.305	1254	78.388	any	1	1	1	1	0	1
YDR-I20C	TRM1	R-II	class_III	IG_1027_genes-complement	divergent	chr04	693302	693303	6d_IP_vs_untagged_cer_reps_peak_350	-14	mild	1.44713	11.0738	99	41.5676	any	0	0	0	1	0	1
YDR-I21W	DPB4	R-II	class_III	IG_1027_genes-complement	divergent	chr04	693302	693303	6d_IP_vs_untagged_cer_reps_peak_350	-164	mild	1.44713	11.0738	99	41.5676	any	0	0	0	1	0	1
YDR-I22W	KIN1	R-II	class_III	IG_1028_genes-complement	tandem	chr04	694323	694324	6d_IP_vs_untagged_cer_reps_peak_351	-304	strong	2.72982	114.803	1130	58.5693	any	1	0	0	1	0	1
YDR-I23C	INO2	R-II	class_III	IG_1030_genes-complement	divergent	chr04	699699	699700	6d_IP_vs_untagged_cer_reps_peak_353	-200	mild	1.59813	18.338	171	31.0708	any	0	0	0	1	0	1
YDR-I24W		R-III	class_IV	IG_1030_genes-complement	divergent	chr04	699699	699700	6d_IP_vs_untagged_cer_reps_peak_353	-616	mild	1.59813	18.338	171	31.0708	any	1	0	0	1	0	1
YDR-I25C	ECM18	R-III	class_IV	IG_1032_genes-complement	divergent						no summit upstream				28.2599	none	0	0	0	0	1	0
YDR-I26W	SWF1	R-III	class_IV	IG_1032_genes-complement	divergent						no summit upstream				28.2599	none	1	0	0	1	0	1
YDR-I27W	ARO1	R-III	class_IV	IG_1033_genes-complement	tandem						no summit upstream				25.9108	none	1	0	0	1	0	1
YDR-I28W	MTC5	R-III	class_IV	IG_1034_genes-complement	tandem						no summit upstream				26.5496	none	0	0	0	1	0	1
YDR-I29C	SAC6	R-III	class_IV	IG_1036_genes-complement	tandem						no summit upstream				35.6317	none	1	0	0	1	0	1
YDR-I30C	FIN1	R-III	class_IV	IG_1037_genes-complement	tandem						no summit upstream				29.7425	none	0	0	0	1	0	1
YDR-I31C		R-III	class_IV	IG_1038_genes-complement	tandem						no summit upstream				26.5753	none	0	0	0	0	1	0
YDR-I32C		R-III	class_IV	IG_1039_genes-complement	tandem	chr04	720462	720463	6d_IP_vs_untagged_cer_reps_peak_354	-42	mild	1.59495	18.1313	169	41.3744	any	0	0	0	1	0	1
YDR-I33C		R-I	class_III	IG_1040_genes-complement	tandem	chr04	721981	721982	6d_IP_vs_untagged_cer_reps_peak_355	-612	strong	6.22028	689.075	6859	113.15	any	1	0	0	1	0	1
YDR-I35C	YCF1	R-II	class_III	IG_1041_genes-complement	tandem						no summit upstream				25.8295	none	1	0	0	1	0	1
YDR-I38W	HPR-I	R-III	class_IV	IG_1042_genes-complement	tandem						no summit upstream				37.2739	none	1	0	0	1	0	1
YDR-I39C	RUB1	R-III	class_IV	IG_1044_genes-complement	divergent						no summit upstream				35.4902	none	1	0	0	1	0	1
YDR-I40W	MTQ2	R-III	class_IV	IG_1044_genes-complement	divergent						no summit upstream				35.4902	none	1	0	0	1	0	1
YDR-I41C	DOP1	R-III	class_IV	IG_1046_genes-complement	tandem						no summit upstream				28.6892	none	0	0	0	1	0	1
YDR-I42C	PEX7	R-III	class_IV	IG_1047_genes-complement	tandem						no summit upstream				28.605	none	0	0	0	1	0	1
YDR-I43C	SAN1	R-II	class_III	IG_1048_genes-complement	tandem	chr04	743992	743993	6d_IP_vs_untagged_cer_reps_peak_356	13	mild	1.82224	31.7755	304	42.3422	any	1	0	0	1	0	1
YDR-I44C	MKC7	R-III	class_IV	IG_1049_genes-complement	divergent						no summit upstream				35.3995	none	0	0	0	1	0	1
YDR-I45W	TAF12	R-II	class_III	IG_1049_genes-complement	divergent						no summit upstream				35.3995	none	1	0	0	1	0	1
YDR-I46C	SWI5	R-III	class_IV	IG_1051_genes-complement	divergent						no summit upstream				41.0272	none	0	0	0	1	0	1
YDR-I47W	EKI1	R-III	class_IV	IG_1051_genes-complement	divergent						no summit upstream				41.0272	none	0	0	0	1	0	1
YDR-I48C	KGD2	R-III	class_III	IG_1053_genes-complement	tandem	chr04	755353	755354	6d_IP_vs_untagged_cer_reps_peak_358	-220	strong	2.85857	129.588	1277	68.7104	any	1	0	0	0	0	1
YDR-I51C	CTH1	R-II	class_IV	IG_1055_genes-complement	divergent	chr04	765456	765457	6d_IP_vs_untagged_cer_reps_peak_359	-210	strong	3.41273	203.198	2011	68.9119	any	1	0	0	1	0	1
YDR-I52W	GIR-II	R-II	class_IV	IG_1055_genes-complement	divergent	chr04	765456	765457	6d_IP_vs_untagged_cer_reps_peak_359	-216	strong	3.41273	203.198	2011	68.9119	any	1	0	0	1	0	1
YDR-I53C	ENT5	R-II	class_III	IG_1057_genes-complement	tandem	chr04	768288	768289	6d_IP_vs_untagged_cer_reps_peak_360	-202	mild	1.51388	14.0357	128	36.5174	any	1	0	0	1	0	1
YDR-I55C	CPR-I	R-II	class_III	IG_1058_genes-complement	divergent						no summit upstream				40.4846	none	1	1	0	1	0	1
YDR-I56W	RPA14	R-II	class_IV	IG_1058_genes-complement	divergent						no summit upstream				40.4846	none	0	0	0	1	0	1
YDR-I58W	HOM2	R-II	class_IV	IG_1059_genes-complement	tandem						no summit upstream				31.2121	none	0	0	0	1	0	1
YDR-I59W	SAC3	R-III	class_IV	IG_1060_genes-complement	tandem						no summit upstream				24.4554	none	0	0	0	1	0	1
YDR-I60W	SSY1	R-II	class_III	IG_1061_genes-complement	tandem						no summit upstream				29.261	none	0	0	0	0	1	0
YDR-I61W	ACL4	R-II	class_IV	IG_1062_genes-complement	tandem						no summit upstream				18.0837	none	0	0	0	1	0	1
YDR-I62C	NBP2	R-III	class_IV	IG_1064_genes-complement	divergent						no summit upstream				23.7629	none	0	0	0	1	0	1
YDR-I63W	CWC15	R-III	class_IV	IG_1064_genes-complement	divergent						no summit upstream				23.7629	none	1	0	0	1	0	1
YDR-I64C	SEC1	R-III	class_IV	IG_1066_genes-complement	divergent						no summit upstream				25.3288	none	0	0	0	0	1	0
YDR-I65W	TRM82	R-II	class_IV	IG_1066_genes-complement	divergent						no summit upstream				25.3288	none	0	0	0	1	0	1
YDR-I66C	SEC5	R-III	class_IV	IG_1068_genes-complement	divergent						no summit upstream				32.8218	none	1	0	0	1	0	1
YDR-I67W	TAF10	R-II	class_III	IG_1068_genes-complement	divergent						no summit upstream				32.8218	none	0	0	0	1	0	1
YDR-I68W	CDC37	R-III	class_III	IG_1069_genes-complement	tandem						no summit upstream				32.7605	none	1	0	0	1	0	1
YDR-I69C	STB3	R-II	class_III	IG_1071_genes-complement	tandem						no summit upstream				34.6213	none	1	0	0	1	0	1
YDR-I69C-A		R-III	class_IV	IG_1072_genes-complement	tandem						no summit upstream				24.8559	none	1	0	0	1	0	1
YDR-I70C	SEC7	R-III	class_III	IG_1073_genes-complement	divergent	chr04	806291	806292	6d_IP_vs_untagged_cer_reps_peak_362	-4013	mild	1.77773	28.9375	276	23.013	any	0	0	0	1	0	1
YDR-I71W	HSP42	R-III	class_III	IG_1073_genes-complement	divergent	chr04	806291	806292	6d_IP_vs_untagged_cer_reps_peak_362	-249	mild	1.77773	28.9375	276	23.013	any	1	0	0	0	0	1
YDR-I72W	SUP35	R-II	class_III	IG_1074_genes-complement	tandem						no summit upstream				29.8623	none	1	0	0	1	0	1
YDR-I73C	ARG82	R-III	class_IV	IG_1076_genes-complement	divergent	chr04	811863	811864	6d_IP_vs_untagged_cer_reps_peak_363	-186	mild	1.56951	16.7137	155	44.5666	any	1	0	0	1	0	1
YDR-I74W	HMO1	R-II	class_III	IG_1076_genes-complement	divergent	chr04	811863	811864	6d_IP_vs_untagged_cer_reps_peak_363	-218	mild	1.56951	16.7137	155	44.5666	any	1	0	0	1	0	1
YDR-I75C	RSM24	R-III	class_IV	IG_1078_genes-complement	divergent						no summit upstream				32.9176	none	1	0	0	1	0	1
YDR-I76W	NGG1	R-III	class_IV	IG_1078_genes-complement	divergent						no summit upstream				32.9176	none	1	0	0	1	0	1
YDR-I77W	UBC1	R-II	class_III	IG_1079_genes-complement	tandem						no summit upstream				33.9388	none	1	0	0	1	0	1
YDR-I78W	SDH4	R-III	class_III	IG_1080_genes-complement	tandem						no summit upstream				29.9268	none	1	0	0	0	0	1
YDR-I79C	CSN9	R-III	class_III	IG_1082_genes-complement	divergent						no summit upstream				25.4543	none	1	0	0	0	0	1
YDR-I79W-A	NVJ3	R-II	class_IV	IG_1082_genes-complement	divergent						no summit upstream				25.4543	none	0	0	0	0	1	0
YDR-I80W	SCC2	R-II	class_IV	IG_1083_genes-complement	tandem	chr04	821020	821021	6d_IP_vs_untagged_cer_reps_peak_364	-146	mild	1.58382	17.5174	163	37.2403	any	0	0	0	1	0	1
YDR-I81C	SAS4	R-III	class_IV	IG_1085_genes-complement	divergent						no summit upstream				30.7339	none	0	0	0	0	1	0
YDR-I82W	CDC1	R-III	class_IV	IG_1085_genes-complement	divergent						no summit upstream				30.7339	none	0	0	0	1	0	1
YDR-I82W-A		R-III	class_IV	IG_1086_genes-complement	tandem						no summit upstream				23.4621	none	1	0	0	1	0	1
YDR-I83W	PLP1	R-III	class_IV	IG_1087_genes-complement	tandem						no summit upstream				19.4238	none	0	0	0	1	0	1
YDR-I84C	ATC1	R-I	class_IV	IG_1089_genes-complement	tandem						no summit upstream				31.9801	none	0	0	0	1	0	1
YDR-I85C	UPS3	R-III	class_IV	IG_1090_genes-complement	tandem						no summit upstream				35.8201	none	0	0	0	1	0	1
YDR-I86C	SND1	R-I	class_III	IG_1091_genes-complement	tandem	chr04	836132	836133	6d_IP_vs_untagged_cer_reps_peak_365	-585	strong	3.9855	284.501	2821	81.5424	any	1	0	0	1	0	1
YDR-I89W	SLY1	R-III	class_III	IG_1092_genes-complement	tandem						no summit upstream				32.5046	none	1	0	0	1	0	1
YDR-I90C	RVB1	R-II	class_IV	IG_1094_genes-complement	divergent						no summit upstream				34.3698	none	1	0	0	1	0	1
YDR-I91W	HST4	R-III	class_IV	IG_1094_genes-complement	divergent						no summit upstream				34.3698	none	0	0	0	0	1	0
YDR-I94C	MSS116	R-II	class_III	IG_1097_genes-complement	divergent						no summit upstream				40.9869	none	1	0	0	1	0	1
YDR-I94W-A		R-III	class_IV	IG_1097_genes-complement	divergent						no summit upstream				40.9869	none	0	0	0	1	0	1
YDR-I95W	REF2	R-II	class_IV	IG_1098_genes-complement	tandem						no summit upstream				30.8883	none	1	0	0	1	0	1
YDR-I96C	CAB5	R-III	class_IV	IG_1100_genes-complement	divergent						no summit upstream				27.8042	none	1	0	0	1	0	1
YDR-I97W	CBS2	R-III	class_IV	IG_1100_genes-complement	divergent						no summit upstream				27.8042	none	1	0	0	1	0	1
YDR-I98C	RKM2	R-III	class_IV	IG_1102_genes-complement	divergent						no summit upstream				30.5982	none	0	0	0	1	0	1
YDR-I99W		R-III	class_III	IG_1102_genes-complement	divergent						no summit upstream				30.5982	none	0	0	0	1	0	1
YDR-II00C	VPS64	R-III	class_III	IG_1103_genes-complement	divergent						no summit upstream				25.3882	none	0	0	0	0	1	0
YDR-II01W	SPC19	R-III	class_IV	IG_1103_genes-complement	divergent						no summit upstream				25.3882	none	0	0	0	0	1	0
YDR-II04W	COQ4	R-III	class_III	IG_1105_genes-complement	tandem						no summit upstream				27.9966	none	1	0	0	0	0	1
YDR-II05W	MSC2	R-III	class_III	IG_1106_genes-complement	tandem						no summit upstream				34.336	none	1	0	0	1	0	1
YDR-II06W	EBS1	R-II	class_III	IG_1107_genes-complement	tandem						no summit upstream				25.4426	none	0	0	0	1	0	1
YDR-II07C	UME6	R-II	class_III	IG_1109_genes-complement	divergent	chr04	868074	868075	6d_IP_vs_untagged_cer_reps_peak_367	-473	mild	2.09881	52.672	511	52.2441	any	0	0	0	0	1	0
YDR-II08W	MSS4	R-II	class_III	IG_1109_genes-complement	divergent	chr04	868074	868075	6d_IP_vs_untagged_cer_reps_peak_367	-26	mild	2.09881	52.672	511	52.2441	any	1	0	0	1	0	1
YDR-II09C		R-III	class_IV	IG_1111_genes-complement	divergent	chr04	884447	884448	6d_IP_vs_untagged_cer_reps_peak_368	-12998	mild	1.77932	28.9375	276	20.6448	any	0	0	0	1	0	1
YDR-II11W	GCD6	R-II	class_III	IG_1111_genes-complement	divergent	chr04	884447	884448	6d_IP_vs_untagged_cer_reps_peak_368	-221	mild	1.77932	28.9375	276	20.6448	any	0	0	0	1	0	1
YDR-II12W	TCP1	R-II	class_III	IG_1112_genes-complement	tandem						no summit upstream				28.8447	none	1	0	0	1	0	1
YDR-II13W	UPC2	R-II	class_IV	IG_1113_genes-complement	tandem						no summit upstream				29.0339	none	1	0	0	1	0	1
YDR-II14W	AHA1	R-III	class_IV	IG_1114_genes-complement	tandem						no summit upstream				33.7889	none	1	0	0	1	0	1
YDR-II15C		R-III	class_II	IG_1116_genes-complement	divergent						no summit upstream				48.1317	none	0	0	1	0	1	0
YDR-II16W	ADR-I	RØ	class_III	IG_1116_genes-complement	divergent						no summit upstream				48.1317	none	1	0	0	0	0	1
YDR-II17C	RAD9	R-III	class_III	IG_1118_genes-complement	tandem						no summit upstream				33.2544	none	0	0	0	1	0	1
YDR-II18C	SPR-II8	R-III	class_IV	IG_1119_genes-complement	tandem						no summit upstream				32.9413	none	0	0	0	0	1	0
YDR-II19C	MFB1	R-II	class_III	IG_1120_genes-complement	tandem						no summit upstream				33.8365	none	0	0	0	1	0	1
YDR-II20C		R-III	class_IV	IG_1121_genes-complement	divergent						no summit upstream				24.0027	none	0	0	0	1	0	1
YDR-II21W	GTB1	R-III	class_IV	IG_1121_genes-complement	divergent						no summit upstream				24.0027	none	0	0	0	1	0	1
YDR-II22W		R-I	class_IV	IG_1122_genes-complement	tandem	chr04	909611	909612	6d_IP_vs_untagged_cer_reps_peak_371	-397	strong	2.86493	130.505	1286	61.955	any	1	0	0	1	0	1
YDR-II23W	CRF1	R-II	class_III	IG_1123_genes-complement	tandem	chr04	911587	911588	6d_IP_vs_untagged_cer_reps_peak_372	-512	mild	1.69667	23.8388	225	41.8922	any	1	0	0	0	0	1
YDR-II24C	HTB1	R-II	class_III	IG_1125_genes-complement	divergent	chr04	915068	915069	6d_IP_vs_untagged_cer_reps_peak_374	-317	strong	3.88695	268.982	2666	73.3743	any	1	1	0	1	0	1
YDR-II25W	HTA1	R-II	class_III	IG_1125_genes-complement	divergent	chr04	915068	915069	6d_IP_vs_untagged_cer_reps_peak_374	-385	strong	3.88695	268.982	2666	73.3743	any	1	1	0	1	0	1
YDR-II26W	ADK1	R-III	class_IV	IG_1126_genes-complement	tandem						no summit upstream				45.3878	none	1	0	0	1	0	1
YDR-II27W	SIR4	R-II	class_III	IG_1127_genes-complement	tandem						no summit upstream				25.5399	none	0	0	0	1	0	1
YDR-II28C	PCF11	R-II	class_IV	IG_1129_genes-complement	divergent						no summit upstream				25.5325	none	0	0	0	1	0	1
YDR-II29W	IVY1	R-III	class_IV	IG_1129_genes-complement	divergent						no summit upstream				25.5325	none	1	0	0	1	0	1
YDR-II30W		R-III	class_IV	IG_1130_genes-complement	tandem						no summit upstream				22.1933	none	1	0	0	1	0	1
YDR-II31C	COX20	R-III	class_IV	IG_1131_genes-complement	divergent						no summit upstream				38.9331	none	1	0	0	1	0	1
YDR-II32W	HEM1	R-I	class_III	IG_1131_genes-complement	divergent						no summit upstream				38.9331	none	1	0	0	1	0	1
YDR-II33C	RTN1	R-I	class_III	IG_1133_genes-complement	divergent	chr04	930664	930665	6d_IP_vs_untagged_cer_reps_peak_375	-265	mild	2.06543	50.1048	486	49.1963	any	1	0	0	1	0	1
YDR-II34W	LYS4	R-III	class_IV	IG_1133_genes-complement	divergent	chr04	930664	930665	6d_IP_vs_untagged_cer_reps_peak_375	-404	mild	2.06543	50.1048	486	49.1963	any	0	0	0	1	0	1
YDR-II35W	PRP42	R-III	class_IV	IG_1134_genes-complement	tandem						no summit upstream				25.6868	none	0	0	0	1	0	1
YDR-II36C	FMN1	R-III	class_IV	IG_1136_genes-complement	divergent						no summit upstream				27.0172	none	1	0	0	1	0	1
YDR-II37W	MRPL7	R-III	class_IV	IG_1136_genes-complement	divergent						no summit upstream				27.0172	none	0	0	0	1	0	1
YDR-II38C	SEC26	R-II	class_IV	IG_1138_genes-complement	tandem						no summit upstream				38.1461	none	1	0	0	1	0	1
YDR-II39C		R-III	class_III	IG_1139_genes-complement	tandem						no summit upstream				39.4216	none	0	0	0	1	0	1
YDR-II42W	AMD2	R-III	class_IV	IG_1140_genes-complement	tandem	chr04	946232	946233	6d_IP_vs_untagged_cer_reps_peak_376	-487	mild	1.37083	8.01313	69	29.2405	any	1	0	0	1	0	1
YDR-II43C	PRP28	R-III	class_IV	IG_1142_genes-complement	divergent	chr04	950340	950341	6d_IP_vs_untagged_cer_reps_peak_377	-26	mild	1.58541	17.721	165	43.3749	any	0	0	0	1	0	1
YDR-II44W	PEX5	R-II	class_III	IG_1142_genes-complement	divergent	chr04	950340	950341	6d_IP_vs_untagged_cer_reps_peak_377	-184	mild	1.58541	17.721	165	43.3749	any	1	0	0	0	0	1
YDR-II45W	MNN10	R-II	class_IV	IG_1143_genes-complement	tandem	chr04	952625	952626	6d_IP_vs_untagged_cer_reps_peak_378	-103	mild	1.36924	8.01313	69	39.671	any	1	0	0	1	0	1
YDR-II46W	TRS23	R-II	class_III	IG_1144_genes-complement	tandem	chr04	954150	954151	6d_IP_vs_untagged_cer_reps_peak_379	-117	mild	1.71892	25.252	239	48.4507	any	1	0	0	1	0	1
YDR-II46W-A		R-III	class_II	IG_1145_genes-complement	tandem						no summit upstream				120.932	none	1	0	1	1	0	1
YDR-II47W	VHS1	RØ	class_III	IG_1146_genes-complement	tandem						no summit upstream				85.4374	none	1	0	0	0	0	1
YDR-II48C		R-III	class_IV	IG_1148_genes-complement	tandem						no summit upstream				28.5629	none	1	1	0	1	0	1
YDR-II49C		R-II	class_IV	IG_1149_genes-complement	tandem						no summit upstream				35.4754	none	1	0	0	1	0	1
YDR-II50C		R-III	class_IV	IG_1150_genes-complement	divergent						no summit upstream				25.543	none	0	0	0	0	1	0
YDR-II51W	PAM1	R-II	class_III	IG_1150_genes-complement	divergent						no summit upstream				25.543	none	1	0	0	1	0	1
YDR-II52W	BTT1	R-III	class_IV	IG_1151_genes-complement	tandem						no summit upstream				27.012	none	0	0	0	1	0	1
YDR-II53C	MET32	R-III	class_IV	IG_1153_genes-complement	divergent						no summit upstream				26.8921	none	1	0	0	1	0	1
YDR-II54W	CHL4	R-II	class_III	IG_1153_genes-complement	divergent						no summit upstream				26.8921	none	1	0	0	1	0	1
YDR-II55C	RMD5	R-II	class_III	IG_1155_genes-complement	tandem	chr04	967904	967905	6d_IP_vs_untagged_cer_reps_peak_384	-43	strong	3.03023	150.298	1483	79.2092	any	1	0	0	1	0	1
YDR-II56C	CTA1	RØ	class_I	IG_1156_genes-complement	tandem						no summit upstream				85.6101	none	1	1	1	1	0	1
YDR-II57C	RKM4	R-III	class_IV	IG_1157_genes-complement	tandem						no summit upstream				35.6515	none	0	0	0	1	0	1
YDR-II58C	HSP78	R-II	class_III	IG_1158_genes-complement	tandem	chr04	974455	974456	6d_IP_vs_untagged_cer_reps_peak_385	-175	mild	1.37878	8.29801	72	39.7853	any	1	0	0	0	0	1
YDR-II59C	YAP6	R-II	class_IV	IG_1159_genes-complement	tandem	chr04	976654	976655	6d_IP_vs_untagged_cer_reps_peak_386	-801	strong	6.97845	849.158	8458	85.1298	any	1	0	0	0	0	1
YDR-II60C	SWM1	R-III	class_II	IG_1160_genes-complement	tandem						no summit upstream				28.1652	none	1	0	1	1	0	1
YDR-II61C	EXG2	R-III	class_IV	IG_1161_genes-complement	divergent	chr04	993108	993109	6d_IP_vs_untagged_cer_reps_peak_387	-13849	mild	1.93986	40.3653	389	22.7329	any	1	0	0	1	0	1
YDR-II62W		RØ	class_III	IG_1161_genes-complement	divergent	chr04	993108	993109	6d_IP_vs_untagged_cer_reps_peak_387	-14	mild	1.93986	40.3653	389	22.7329	any	1	0	0	1	0	1
YDR-II63C	DIN7	R-III	class_III	IG_1163_genes-complement	tandem						no summit upstream				25.6593	none	0	0	0	0	1	0
YDR-II64C	AKR-I	R-II	class_III	IG_1164_genes-complement	divergent	chr04	998604	998605	6d_IP_vs_untagged_cer_reps_peak_389	-197	mild	1.39308	8.88204	78	37.3704	any	1	0	0	1	0	1
YDR-II65W	PEX10	R-III	class_IV	IG_1164_genes-complement	divergent	chr04	998604	998605	6d_IP_vs_untagged_cer_reps_peak_389	-214	mild	1.39308	8.88204	78	37.3704	any	1	0	0	1	0	1
YDR-II66C	HEL2	R-II	class_IV	IG_1166_genes-complement	tandem						no summit upstream				26.2388	none	1	0	0	1	0	1
YDR-II67C	CIA1	R-III	class_IV	IG_1167_genes-complement	divergent						no summit upstream				28.1732	none	0	0	0	1	0	1
YDR-II68W	MSW1	R-III	class_IV	IG_1167_genes-complement	divergent						no summit upstream				28.1732	none	0	0	0	1	0	1
YDR-II71C		R-III	class_IV	IG_1169_genes-complement	divergent						no summit upstream				27.7359	none	0	0	0	0	1	0
YDR-II72W	GLO2	R-III	class_III	IG_1169_genes-complement	divergent						no summit upstream				27.7359	none	1	0	0	0	0	1
YDR-II73W	DON1	R-III	class_III	IG_1170_genes-complement	tandem						no summit upstream				32.0906	none	1	0	0	0	0	1
YDR-II74C		R-III	class_II	IG_1172_genes-complement	divergent						no summit upstream				79.971	none	1	0	1	1	0	1
YDR-II75W	BSC2	R-I	class_III	IG_1172_genes-complement	divergent						no summit upstream				79.971	none	1	0	0	1	0	1
YDR-II76C	PMP3	RØ	class_I	IG_1174_genes-complement	tandem						no summit upstream				112.842	none	1	1	1	1	0	1
YDR-II77C	MTH1	R-II	class_I	IG_1175_genes-complement	tandem						no summit upstream				68.8879	none	1	1	1	1	0	1
YDR-II78C		R-III	class_II	IG_1176_genes-complement	divergent						no summit upstream				26.8289	none	0	0	1	0	1	0
YDR-II79W	RNH202	R-III	class_IV	IG_1176_genes-complement	divergent						no summit upstream				26.8289	none	0	0	0	1	0	1
YDR-II80W	RRP45	R-II	class_IV	IG_1177_genes-complement	tandem						no summit upstream				30.3288	none	1	0	0	1	0	1
YDR-II81C	PHM6	R-II	class_IV	IG_1179_genes-complement	tandem	chr04	1022340	1022341	6d_IP_vs_untagged_cer_reps_peak_392	52	mild	1.54408	15.5401	143	33.6364	any	1	0	0	1	0	1
YDR-II82C	MRX10	R-III	class_IV	IG_1180_genes-complement	tandem						no summit upstream				24.0466	none	0	0	0	0	1	0
YDR-II83C	GCN2	R-III	class_III	IG_1181_genes-complement	tandem						no summit upstream				26.3728	none	0	0	0	1	0	1
YDR-II84C	DPP1	R-III	class_IV	IG_1182_genes-complement	divergent						no summit upstream				30.156	none	1	0	0	1	0	1
YDR-II85W	ZIP1	R-III	class_IV	IG_1182_genes-complement	divergent						no summit upstream				30.156	none	0	0	0	0	1	0
YDR-II86C		R-III	class_IV	IG_1184_genes-complement	divergent	chr04	1035847	1035848	6d_IP_vs_untagged_cer_reps_peak_393	-259	mild	1.45348	11.4054	102	37.2521	any	1	0	0	0	0	1
YDR-II87W	INM2	R-III	class_III	IG_1184_genes-complement	divergent	chr04	1035847	1035848	6d_IP_vs_untagged_cer_reps_peak_393	-112	mild	1.45348	11.4054	102	37.2521	any	1	0	0	0	0	1
YDR-II88W	NSE3	R-III	class_IV	IG_1185_genes-complement	tandem						no summit upstream				35.397	none	1	0	0	1	0	1
YDR-II91W	HRQ1	R-II	class_III	IG_1187_genes-complement	tandem						no summit upstream				25.6507	none	0	0	0	1	0	1
YDR-II92C	SRP101	R-III	class_IV	IG_1189_genes-complement	tandem						no summit upstream				31.2035	none	0	0	0	1	0	1
YDR-II93C	SSD1	RØ	class_III	IG_1190_genes-complement	tandem	chr04	1049673	1049674	6d_IP_vs_untagged_cer_reps_peak_394	-222	strong	3.17487	169.055	1670	77.6585	any	1	0	0	1	0	1
YDR-II94C	DPL1	R-II	class_III	IG_1191_genes-complement	tandem						no summit upstream				28.2965	none	1	0	0	1	0	1
YDR-II95C	HDA2	R-III	class_IV	IG_1192_genes-complement	divergent	chr04	1055132	1055133	6d_IP_vs_untagged_cer_reps_peak_395	-406	mild	1.49163	12.9534	118	32.7537	any	0	0	0	1	0	1
YDR-II96W	MHR-I	R-II	class_IV	IG_1192_genes-complement	divergent	chr04	1055132	1055133	6d_IP_vs_untagged_cer_reps_peak_395	-25	mild	1.49163	12.9534	118	32.7537	any	1	0	0	1	0	1
YDR-II97W	SUR-II	R-I	class_III	IG_1193_genes-complement	tandem	chr04	1056234	1056235	6d_IP_vs_untagged_cer_reps_peak_396	-275	mild	2.30544	70.9433	693	58.5146	any	0	0	0	1	0	1
YDR-II98C	ATP5	R-III	class_IV	IG_1195_genes-complement	divergent						no summit upstream				31.9969	none	1	0	0	1	0	1
YDR-II99W	BFR-II	R-II	class_IV	IG_1195_genes-complement	divergent						no summit upstream				31.9969	none	0	0	0	1	0	1
YDR-III00C	PRO1	R-III	class_IV	IG_1197_genes-complement	divergent						no summit upstream				34.7951	none	0	0	0	1	0	1
YDR-III01W	CFT1	R-III	class_IV	IG_1197_genes-complement	divergent						no summit upstream				34.7951	none	0	0	0	1	0	1
YDR-III02W	GPI11	R-II	class_IV	IG_1198_genes-complement	tandem						no summit upstream				39.2488	none	0	0	0	1	0	1
YDR-III03C	RSC3	R-II	class_III	IG_1200_genes-complement	tandem						no summit upstream				27.6667	none	0	0	0	1	0	1
YDR-III04C	CPR5	R-III	class_IV	IG_1201_genes-complement	tandem						no summit upstream				25.2794	none	1	0	0	1	0	1
YDR-III05C	HNT2	R-III	class_IV	IG_1202_genes-complement	tandem						no summit upstream				26.6211	none	1	0	0	1	0	1
YDR-III06C		R-III	class_III	IG_1203_genes-complement	divergent	chr04	1075564	1075565	6d_IP_vs_untagged_cer_reps_peak_397	-348	mild	1.65852	21.5625	203	38.3899	any	1	0	0	0	0	1
YDR-III07W	PMT7	R-III	class_IV	IG_1203_genes-complement	divergent	chr04	1075564	1075565	6d_IP_vs_untagged_cer_reps_peak_397	-250	mild	1.65852	21.5625	203	38.3899	any	0	0	0	0	1	0
YDR-III08C	SRB7	R-III	class_IV	IG_1205_genes-complement	tandem						no summit upstream				24.1223	none	0	0	0	1	0	1
YDR-III09C	GIC2	R-II	class_IV	IG_1206_genes-complement	tandem	chr04	1080588	1080589	6d_IP_vs_untagged_cer_reps_peak_398	-331	strong	4.07927	299.081	2966	78.9305	any	0	0	0	1	0	1
YDR-III10C	SUM1	R-II	class_III	IG_1207_genes-complement	divergent						no summit upstream				34.0254	none	0	0	0	1	0	1
YDR-III11W	TFB1	R-III	class_III	IG_1207_genes-complement	divergent						no summit upstream				34.0254	none	0	0	0	1	0	1
YDR-III12W	SSF2	R-II	class_IV	IG_1208_genes-complement	tandem	chr04	1087186	1087187	6d_IP_vs_untagged_cer_reps_peak_400	-355	strong	3.64045	282.066	2797	77.8767	any	0	0	0	1	0	1
YDR-III13C	PIB1	R-II	class_III	IG_1210_genes-complement	tandem	chr04	1090297	1090298	6d_IP_vs_untagged_cer_reps_peak_401	-151	mild	1.96529	42.1255	406	52.8873	any	1	0	0	1	0	1
YDR-III14C	RAD34	R-III	class_IV	IG_1211_genes-complement	tandem						no summit upstream				23.6873	none	1	0	0	1	0	1
YDR-III15C	IPK1	R-III	class_IV	IG_1212_genes-complement	divergent						no summit upstream				32.6122	none	0	0	0	0	1	0
YDR-III16W	OMS1	R-III	class_IV	IG_1212_genes-complement	divergent						no summit upstream				32.6122	none	1	0	0	1	0	1
YDR-III17W	HIM1	R-II	class_IV	IG_1213_genes-complement	tandem	chr04	1095286	1095287	6d_IP_vs_untagged_cer_reps_peak_402	-6848	strong	3.03182	150.781	1488	21.6001	any	0	0	0	0	1	0
YDR-III18W	MCM21	R-III	class_IV	IG_1214_genes-complement	tandem						no summit upstream				26.1916	none	1	0	0	1	0	1
YDR-III19C		R-III	class_IV	IG_1216_genes-complement	tandem						no summit upstream				32.396	none	1	0	0	1	0	1
YDR-III20C	SWA2	R-III	class_IV	IG_1217_genes-complement	tandem						no summit upstream				24.3853	none	0	0	0	0	1	0
YDR-III21W	ASP1	R-II	class_IV	IG_1218_genes-complement	tandem						no summit upstream				39.7387	none	0	0	0	1	0	1
YDR-III22C-A	TIM11	R-III	class_III	IG_1221_genes-complement	tandem						no summit upstream				32.9975	none	1	0	0	1	0	1
YDR-III22W	MRPL35	R-III	class_IV	IG_1219_genes-complement	tandem						no summit upstream				20.8511	none	1	0	0	1	0	1
YDR-III23C	PEP7	R-III	class_IV	IG_1222_genes-complement	tandem						no summit upstream				24.3055	none	1	0	0	1	0	1
YDR-III24C	UTP4	R-II	class_IV	IG_1223_genes-complement	divergent						no summit upstream				38.51	none	0	0	0	1	0	1
YDR-III25W	YCG1	R-II	class_IV	IG_1223_genes-complement	divergent						no summit upstream				38.51	none	0	0	0	1	0	1
YDR-III26C	YSP2	R-II	class_IV	IG_1225_genes-complement	divergent	chr04	1125147	1125148	6d_IP_vs_untagged_cer_reps_peak_403	-119	mild	1.85085	33.9096	325	45.3239	any	0	0	0	1	0	1
YDR-III27W		R-II	class_III	IG_1225_genes-complement	divergent	chr04	1125147	1125148	6d_IP_vs_untagged_cer_reps_peak_403	-155	mild	1.85085	33.9096	325	45.3239	any	1	0	0	1	0	1
YDR-III28C	SKP1	R-II	class_III	IG_1226_genes-complement	tandem	chr04	1126084	1126085	6d_IP_vs_untagged_cer_reps_peak_404	-11	mild	2.26411	67.3328	657	63.9569	any	1	0	0	1	0	1
YDR-III29C	PEX3	R-II	class_III	IG_1227_genes-complement	divergent						no summit upstream				32.4995	none	1	0	0	0	0	1
YDR-III30W	UBX5	R-III	class_III	IG_1227_genes-complement	divergent						no summit upstream				32.4995	none	1	0	0	0	0	1
YDR-III31W	GPI8	R-II	class_III	IG_1228_genes-complement	tandem						no summit upstream				40.782	none	1	0	0	1	0	1
YDR-III32W	IRC3	R-III	class_IV	IG_1229_genes-complement	tandem						no summit upstream				21.9602	none	0	0	0	1	0	1
YDR-III33C	RQC1	R-II	class_III	IG_1231_genes-complement	divergent	chr04	1135748	1135749	6d_IP_vs_untagged_cer_reps_peak_405	-294	mild	1.71098	24.777	234	44.5018	any	1	0	0	1	0	1
YDR-III34W	SWR-I	R-II	class_III	IG_1231_genes-complement	divergent	chr04	1135748	1135749	6d_IP_vs_untagged_cer_reps_peak_405	-76	mild	1.71098	24.777	234	44.5018	any	1	0	0	1	0	1
YDR-III35W	MSN5	R-II	class_III	IG_1232_genes-complement	tandem	chr04	1140816	1140817	6d_IP_vs_untagged_cer_reps_peak_406	-271	mild	1.53455	14.9678	137	36.2939	any	1	0	0	1	0	1
YDR-III36W	MRX8	R-III	class_IV	IG_1233_genes-complement	tandem						no summit upstream				30.4916	none	1	0	0	1	0	1
YDR-III37W	MRPS28	R-II	class_IV	IG_1234_genes-complement	tandem	chr04	1146252	1146253	6d_IP_vs_untagged_cer_reps_peak_407	-20	mild	1.36765	8.01313	69	39.7219	any	1	0	0	1	0	1
YDR-III38C		R-III	class_III	IG_1236_genes-complement	tandem						no summit upstream				31.9801	none	1	0	0	1	0	1
YDR-III39C	FCF1	R-II	class_IV	IG_1237_genes-complement	divergent						no summit upstream				35.8504	none	0	0	0	1	0	1
YDR-III40W		R-III	class_IV	IG_1237_genes-complement	divergent						no summit upstream				35.8504	none	0	0	0	1	0	1
YDR-III41C		R-II	class_IV	IG_1239_genes-complement	tandem	chr04	1153935	1153936	6d_IP_vs_untagged_cer_reps_peak_409	-278	mild	1.74753	26.9451	256	45.9661	any	1	0	0	1	0	1
YDR-III42C	HXT7	R-II	class_III	IG_1240_genes-complement	tandem	chr04	1156510	1156511	6d_IP_vs_untagged_cer_reps_peak_410	-497	strong	3.72641	245.11	2428	46.6056	any	1	0	0	1	0	1
YDR-III42C	HXT7	R-II	class_III	IG_1240_genes-complement	tandem	chr04	1157460	1157461	6d_IP_vs_untagged_cer_reps_peak_411	-1447	strong	2.94917	140.746	1388	46.6056	any	1	0	0	1	0	1
YDR-III43C	HXT6	R-II	class_III	IG_1241_genes-complement	tandem						no summit upstream				86.4225	none	1	0	0	1	0	1
YDR-III44C		R-III	class_II	IG_1242_genes-complement	tandem						no summit upstream				53.1393	none	0	0	1	1	0	1
YDR-III45C	HXT3	R-I	class_IV	IG_1243_genes-complement	tandem	chr04	1166607	1166608	6d_IP_vs_untagged_cer_reps_peak_413	-1916	strong	3.16375	167.546	1655	39.8276	any	1	0	0	1	0	1
YDR-III46C	SVF1	R-II	class_III	IG_1244_genes-complement	divergent	chr04	1168874	1168875	6d_IP_vs_untagged_cer_reps_peak_414	-118	mild	1.76184	27.9337	266	42.6735	any	1	0	0	1	0	1
YDR-III47W	MRP1	R-III	class_IV	IG_1244_genes-complement	divergent	chr04	1168874	1168875	6d_IP_vs_untagged_cer_reps_peak_414	-221	mild	1.76184	27.9337	266	42.6735	any	1	0	0	1	0	1
YDR-III48C	PAL1	R-III	class_IV	IG_1246_genes-complement	tandem						no summit upstream				32.0707	none	0	0	0	1	0	1
YDR-III49C	YPS7	R-II	class_III	IG_1247_genes-complement	tandem	chr04	1175830	1175831	6d_IP_vs_untagged_cer_reps_peak_415	-1572	mild	1.61402	19.1752	179	29.4444	any	1	0	0	1	0	1
YDR-III50C	ATP22	R-II	class_IV	IG_1248_genes-complement	divergent						no summit upstream				32.7006	none	1	0	0	1	0	1
YDR-III51W	SBE2	R-II	class_III	IG_1248_genes-complement	divergent						no summit upstream				32.7006	none	1	0	0	1	0	1
YDR-III52W	YPQ2	R-II	class_IV	IG_1249_genes-complement	tandem						no summit upstream				28.9047	none	1	0	0	1	0	1
YDR-III53W	TRR-I	R-II	class_II	IG_1250_genes-complement	tandem	chr04	1183251	1183252	6d_IP_vs_untagged_cer_reps_peak_416	2	strong	2.54227	94.5089	928	61.9206	any	1	0	1	1	0	1
YDR-III54W	TRP4	R-III	class_IV	IG_1251_genes-complement	tandem						no summit upstream				45.579	none	1	0	0	1	0	1
YDR-III57C	CNL1	R-II	class_IV	IG_1254_genes-complement	divergent	chr04	1189806	1189807	6d_IP_vs_untagged_cer_reps_peak_417	-165	strong	3.10335	159.578	1576	71.8296	any	1	0	0	1	0	1
YDR-III58W	GGA1	R-III	class_III	IG_1254_genes-complement	divergent	chr04	1189806	1189807	6d_IP_vs_untagged_cer_reps_peak_417	-203	strong	3.10335	159.578	1576	71.8296	any	1	0	0	0	0	1
YDR-III61C	BCP1	R-II	class_III	IG_1257_genes-complement	tandem						no summit upstream				33.2867	none	1	0	0	1	0	1
YDR-III62C	TFC6	R-III	class_IV	IG_1258_genes-complement	divergent	chr04	1198941	1198942	6d_IP_vs_untagged_cer_reps_peak_419	-145	mild	1.43123	10.4244	93	36.5418	any	1	0	0	0	0	1
YDR-III63W	ESC2	R-II	class_III	IG_1258_genes-complement	divergent	chr04	1198941	1198942	6d_IP_vs_untagged_cer_reps_peak_419	-107	mild	1.43123	10.4244	93	36.5418	any	0	0	0	0	1	0
YDR-III63W-A	SEM1	R-II	class_III	IG_1259_genes-complement	tandem	chr04	1201697	1201698	6d_IP_vs_untagged_cer_reps_peak_420	-409	mild	1.69349	23.6066	223	28.7524	any	1	0	0	1	0	1
YDR-III64C	CDC40	R-II	class_III	IG_1261_genes-complement	tandem						no summit upstream				29.8351	none	1	0	0	1	0	1
YDR-III65C	ESF1	R-II	class_IV	IG_1262_genes-complement	tandem						no summit upstream				19.3811	none	0	0	0	1	0	1
YDR-III66C		R-III	class_IV	IG_1263_genes-complement	divergent						no summit upstream				25.9402	none	0	0	0	1	0	1
YDR-III67W	KEI1	R-III	class_IV	IG_1263_genes-complement	divergent						no summit upstream				25.9402	none	0	0	0	1	0	1
YDR-III68W	YPR-I	R-II	class_IV	IG_1264_genes-complement	tandem						no summit upstream				41.0351	none	1	0	0	1	0	1
YDR-III69C	XRS2	R-III	class_IV	IG_1266_genes-complement	tandem						no summit upstream				21.8941	none	0	0	0	0	1	0
YDR-III70C	DXO1	R-III	class_IV	IG_1267_genes-complement	divergent						no summit upstream				30.5873	none	0	0	0	1	0	1
YDR-III71W	CTS2	R-III	class_IV	IG_1267_genes-complement	divergent						no summit upstream				30.5873	none	0	0	0	1	0	1
YDR-III72C	VPS74	R-II	class_III	IG_1269_genes-complement	divergent						no summit upstream				33.2052	none	1	0	0	1	0	1
YDR-III73W	FRQ1	R-II	class_III	IG_1269_genes-complement	divergent						no summit upstream				33.2052	none	1	0	0	1	0	1
YDR-III74C	PHO92	R-III	class_IV	IG_1271_genes-complement	divergent						no summit upstream				34.8304	none	0	0	0	0	1	0
YDR-III74W-A	WIP1	R-III	class_III	IG_1271_genes-complement	divergent						no summit upstream				34.8304	none	1	0	0	1	0	1
YDR-III75C	BCS1	R-III	class_IV	IG_1273_genes-complement	divergent						no summit upstream				31.6425	none	1	0	0	1	0	1
YDR-III76W	ARH1	R-III	class_IV	IG_1273_genes-complement	divergent						no summit upstream				31.6425	none	1	0	0	0	0	1
YDR-III77W	ATP17	R-III	class_IV	IG_1274_genes-complement	tandem						no summit upstream				38.9128	none	1	0	0	1	0	1
YDR-III78C	LSM6	R-III	class_IV	IG_1276_genes-complement	divergent						no summit upstream				34.4622	none	1	0	0	1	0	1
YDR-III79C-A	SDH6	R-III	class_I	IG_1278_genes-complement	divergent	chr04	1233868	1233869	6d_IP_vs_untagged_cer_reps_peak_421	-295	strong	3.81542	258.41	2561	73.1835	any	1	0	1	1	0	1
YDR-III79W	RGA2	R-III	class_IV	IG_1276_genes-complement	divergent						no summit upstream				34.4622	none	1	0	0	1	0	1
YDR-III80W	ARO10	R-II	class_III	IG_1278_genes-complement	divergent	chr04	1233868	1233869	6d_IP_vs_untagged_cer_reps_peak_421	-249	strong	3.81542	258.41	2561	73.1835	any	1	0	0	1	0	1
YDR-III81C-A		R-III	class_IV	IG_1281_genes-complement	divergent	chr04	1239219	1239220	6d_IP_vs_untagged_cer_reps_peak_424	-354	mild	1.76025	27.6851	263	41.6895	any	1	0	0	1	0	1
YDR-III81W	YRA1	R-II	class_III	IG_1279_genes-complement	tandem	chr04	1236302	1236303	6d_IP_vs_untagged_cer_reps_peak_422	-166	mild	2.2498	65.9093	643	57.0158	any	1	0	0	1	0	1
YDR-III82W	RPP2B	R-I	class_IV	IG_1281_genes-complement	divergent	chr04	1239219	1239220	6d_IP_vs_untagged_cer_reps_peak_424	-190	mild	1.76025	27.6851	263	41.6895	any	0	0	0	1	0	1
YDR-III83C	NKP1	R-III	class_IV	IG_1283_genes-complement	tandem						no summit upstream				39.5908	none	1	0	0	1	0	1
YDR-III84C	ATO3	R-II	class_III	IG_1284_genes-complement	divergent	chr04	1242419	1242420	6d_IP_vs_untagged_cer_reps_peak_425	-288	strong	4.48618	364.951	3624	83.0374	any	1	0	0	1	0	1
YDR-III85W	EFT2	R-II	class_III	IG_1284_genes-complement	divergent	chr04	1242419	1242420	6d_IP_vs_untagged_cer_reps_peak_425	-772	strong	4.48618	364.951	3624	83.0374	any	1	0	0	1	0	1
YDR-III86W	MUS81	R-III	class_IV	IG_1285_genes-complement	tandem						no summit upstream				25.218	none	0	0	0	1	0	1
YDR-III87C	CIN10	R-III	class_IV	IG_1287_genes-complement	divergent						no summit upstream				34.3655	none	0	0	0	0	1	0
YDR-III88W	RVS167	R-III	class_III	IG_1287_genes-complement	divergent						no summit upstream				34.3655	none	1	0	0	0	0	1
YDR-III89W	SAC7	R-II	class_III	IG_1288_genes-complement	tandem						no summit upstream				41.4944	none	1	0	0	1	0	1
YDR-III90C	UBA2	R-III	class_IV	IG_1290_genes-complement	tandem	chr04	1257097	1257098	6d_IP_vs_untagged_cer_reps_peak_426	-217	mild	1.77932	28.9375	276	43.8113	any	0	0	0	1	0	1
YDR-III91C		R-III	class_IV	IG_1291_genes-complement	divergent						no summit upstream				25.5953	none	0	0	0	0	1	0
YDR-III92W	SPT3	R-III	class_IV	IG_1291_genes-complement	divergent						no summit upstream				25.5953	none	0	0	0	0	1	0
YDR-III93W	SHE9	R-III	class_IV	IG_1292_genes-complement	tandem						no summit upstream				29.8754	none	1	0	0	1	0	1
YDR-III94W	RPT3	R-II	class_III	IG_1293_genes-complement	tandem						no summit upstream				30.4682	none	1	0	0	1	0	1
YDR-III95W	SXM1	R-II	class_IV	IG_1294_genes-complement	tandem	chr04	1263115	1263116	6d_IP_vs_untagged_cer_reps_peak_427	-96	mild	1.80634	30.7304	293	46.5557	any	0	0	0	1	0	1
YDR-III96W		R-II	class_IV	IG_1295_genes-complement	tandem						no summit upstream				29.951	none	1	0	0	1	0	1
YDR-III97C	NCB2	R-II	class_IV	IG_1296_genes-complement	divergent	chr04	1267102	1267103	6d_IP_vs_untagged_cer_reps_peak_428	-145	mild	1.70303	24.3059	230	44.521	any	1	0	0	1	0	1
YDR-III98W	UTP5	R-II	class_IV	IG_1296_genes-complement	divergent	chr04	1267102	1267103	6d_IP_vs_untagged_cer_reps_peak_428	-311	mild	1.70303	24.3059	230	44.521	any	0	0	0	1	0	1
YDR-III99W	HPT1	R-I	class_III	IG_1297_genes-complement	tandem	chr04	1269857	1269858	6d_IP_vs_untagged_cer_reps_peak_429	-152	mild	1.66647	22.0098	207	42.5926	any	1	0	0	1	0	1
YDR400W	URH1	R-III	class_IV	IG_1298_genes-complement	tandem						no summit upstream				31.9038	none	1	0	0	1	0	1
YDR401W		R-III	class_IV	IG_1299_genes-complement	tandem						no summit upstream				19.7281	none	0	0	0	0	1	0
YDR402C	DIT2	R-III	class_IV	IG_1300_genes-complement	divergent						no summit upstream				25.6681	none	0	0	0	0	1	0
YDR403W	DIT1	R-III	class_IV	IG_1300_genes-complement	divergent						no summit upstream				25.6681	none	0	0	0	0	1	0
YDR404C	RPB7	R-II	class_IV	IG_1302_genes-complement	divergent	chr04	1277379	1277380	6d_IP_vs_untagged_cer_reps_peak_430	-93	mild	1.34222	7.05395	60	38.7888	any	1	0	0	1	0	1
YDR405W	MRP20	R-II	class_III	IG_1302_genes-complement	divergent	chr04	1277379	1277380	6d_IP_vs_untagged_cer_reps_peak_430	-215	mild	1.34222	7.05395	60	38.7888	any	1	0	0	1	0	1
YDR406W	PDR-I5	R-III	class_III	IG_1303_genes-complement	tandem	chr04	1278676	1278677	6d_IP_vs_untagged_cer_reps_peak_431	-472	mild	2.01774	46.352	448	41.8846	any	1	0	0	0	0	1
YDR407C	TRS120	R-III	class_IV	IG_1305_genes-complement	tandem						no summit upstream				30.7556	none	0	0	0	1	0	1
YDR408C	ADE8	R-III	class_IV	IG_1306_genes-complement	divergent						no summit upstream				36.1869	none	1	0	0	1	0	1
YDR409W	SIZ1	R-II	class_III	IG_1306_genes-complement	divergent						no summit upstream				36.1869	none	0	0	0	1	0	1
YDR410C	STE14	R-III	class_IV	IG_1308_genes-complement	tandem	chr04	1293301	1293302	6d_IP_vs_untagged_cer_reps_peak_434	-148	mild	1.80952	30.9903	296	47.7053	any	1	0	0	1	0	1
YDR411C	DFM1	R-III	class_IV	IG_1309_genes-complement	divergent						no summit upstream				39.76	none	1	0	0	1	0	1
YDR412W	RRP17	R-II	class_IV	IG_1309_genes-complement	divergent						no summit upstream				39.76	none	0	0	0	1	0	1
YDR413C		R-II	class_IV	IG_1310_genes-complement	tandem						no summit upstream				25.0474	none	0	0	0	1	0	1
YDR414C	ERD1	R-III	class_IV	IG_1311_genes-complement	tandem						no summit upstream				25.5146	none	0	0	0	1	0	1
YDR415C		R-III	class_IV	IG_1312_genes-complement	divergent						no summit upstream				23.2277	none	1	0	0	1	0	1
YDR416W	SYF1	R-III	class_IV	IG_1312_genes-complement	divergent						no summit upstream				23.2277	none	0	0	0	1	0	1
YDR419W	RAD30	R-III	class_IV	IG_1314_genes-complement	tandem						no summit upstream				20.203	none	0	0	0	0	1	0
YDR420W	HKR-I	R-II	class_III	IG_1315_genes-complement	tandem	chr04	1305882	1305883	6d_IP_vs_untagged_cer_reps_peak_435	-326	mild	1.40421	9.33248	82	31.9649	any	1	0	0	1	0	1
YDR421W	ARO80	R-III	class_IV	IG_1316_genes-complement	tandem						no summit upstream				28.6743	none	0	0	0	0	1	0
YDR422C	SIP1	R-II	class_III	IG_1318_genes-complement	tandem						no summit upstream				34.1905	none	1	0	0	1	0	1
YDR423C	CAD1	R-III	class_III	IG_1319_genes-complement	tandem						no summit upstream				33.9216	none	1	0	0	1	0	1
YDR424C	DYN2	R-III	class_IV	IG_1320_genes-complement	divergent						no summit upstream				30.7723	none	1	0	0	1	0	1
YDR425W	SNX41	R-III	class_III	IG_1320_genes-complement	divergent						no summit upstream				30.7723	none	1	0	0	0	0	1
YDR426C		R-III	class_III	IG_1321_genes-complement	divergent						no summit upstream				32.5578	none	1	0	0	1	0	1
YDR427W	RPN9	R-II	class_IV	IG_1321_genes-complement	divergent						no summit upstream				32.5578	none	1	0	0	1	0	1
YDR428C	BNA7	R-III	class_IV	IG_1323_genes-complement	tandem						no summit upstream				26.0979	none	1	0	0	1	0	1
YDR429C	TIF35	R-II	class_III	IG_1324_genes-complement	tandem						no summit upstream				37.3602	none	1	0	0	1	0	1
YDR432W	NPL3	R-I	class_III	IG_1325_genes-complement	tandem						no summit upstream				52.5076	none	1	0	0	1	0	1
YDR434W	GPI17	R-III	class_III	IG_1326_genes-complement	tandem	chr04	1330863	1330864	6d_IP_vs_untagged_cer_reps_peak_439	-272	mild	1.41693	9.79347	87	36.9969	any	1	0	0	1	0	1
YDR434W	GPI17	R-III	class_III	IG_1326_genes-complement	tandem	chr04	1330352	1330353	6d_IP_vs_untagged_cer_reps_peak_438	-783	mild	1.33427	6.7908	57	36.9969	any	1	0	0	1	0	1
YDR435C	PPM1	R-III	class_III	IG_1328_genes-complement	divergent	chr04	1334131	1334132	6d_IP_vs_untagged_cer_reps_peak_440	-144	mild	1.53932	15.3483	141	32.2124	any	1	0	0	0	0	1
YDR436W	PPZ2	R-III	class_III	IG_1328_genes-complement	divergent	chr04	1334131	1334132	6d_IP_vs_untagged_cer_reps_peak_440	-598	mild	1.53932	15.3483	141	32.2124	any	0	0	0	0	1	0
YDR437W	GPI19	R-III	class_IV	IG_1329_genes-complement	tandem						no summit upstream				27.9834	none	0	0	0	1	0	1
YDR438W	THI74	R-III	class_IV	IG_1330_genes-complement	tandem						no summit upstream				26.997	none	1	0	0	1	0	1
YDR439W	LRS4	R-III	class_IV	IG_1331_genes-complement	tandem						no summit upstream				23.0216	none	0	0	0	1	0	1
YDR440W	DOT1	R-III	class_IV	IG_1332_genes-complement	tandem						no summit upstream				19.6389	none	0	0	0	1	0	1
YDR441C	APT2	R-II	class_III	IG_1334_genes-complement	divergent	chr04	1345441	1345442	6d_IP_vs_untagged_cer_reps_peak_441	-243	strong	4.33677	340.39	3378	88.0651	any	1	0	0	1	0	1
YDR442W		R-III	class_IV	IG_1334_genes-complement	divergent	chr04	1345441	1345442	6d_IP_vs_untagged_cer_reps_peak_441	-206	strong	4.33677	340.39	3378	88.0651	any	0	0	0	0	1	0
YDR443C	SSN2	R-III	class_III	IG_1335_genes-complement	divergent						no summit upstream				32.8631	none	0	0	0	0	1	0
YDR444W		R-III	class_IV	IG_1335_genes-complement	divergent						no summit upstream				32.8631	none	0	0	0	1	0	1
YDR445C		R-III	class_IV	IG_1336_genes-complement	divergent						no summit upstream				25.4264	none	1	0	0	1	0	1
YDR446W	ECM11	R-III	class_IV	IG_1336_genes-complement	divergent						no summit upstream				25.4264	none	0	0	0	1	0	1
YDR447C	RPS17B	R-II	class_IV	IG_1338_genes-complement	divergent	chr04	1355788	1355789	6d_IP_vs_untagged_cer_reps_peak_442	-203	mild	2.27047	67.6905	661	50.9872	any	1	0	0	1	0	1
YDR448W	ADA2	R-III	class_III	IG_1338_genes-complement	divergent	chr04	1355788	1355789	6d_IP_vs_untagged_cer_reps_peak_442	-223	mild	2.27047	67.6905	661	50.9872	any	0	0	0	1	0	1
YDR449C	UTP6	R-II	class_III	IG_1340_genes-complement	divergent	chr04	1359684	1359685	6d_IP_vs_untagged_cer_reps_peak_443	-747	strong	2.59313	99.8586	981	44.6539	any	0	0	0	1	0	1
YDR450W	RPS18A	R-II	class_IV	IG_1340_genes-complement	divergent	chr04	1359684	1359685	6d_IP_vs_untagged_cer_reps_peak_443	-213	strong	2.59313	99.8586	981	44.6539	any	1	0	0	1	0	1
YDR451C	YHP1	R-III	class_IV	IG_1342_genes-complement	divergent	chr04	1362495	1362496	6d_IP_vs_untagged_cer_reps_peak_444	-261	mild	2.38014	78.3826	767	43.4407	any	0	0	0	1	0	1
YDR452W	PPN1	R-III	class_IV	IG_1342_genes-complement	divergent	chr04	1362495	1362496	6d_IP_vs_untagged_cer_reps_peak_444	-246	mild	2.38014	78.3826	767	43.4407	any	1	0	0	1	0	1
YDR453C	TSA2	R-III	class_IV	IG_1344_genes-complement	tandem						no summit upstream				17.3146	none	1	0	0	1	0	1
YDR454C	GUK1	R-II	class_IV	IG_1345_genes-complement	tandem						no summit upstream				30.3867	none	0	0	0	1	0	1
YDR457W	TOM1	R-II	class_III	IG_1346_genes-complement	tandem						no summit upstream				32.4435	none	0	0	0	1	0	1
YDR458C	HEH2	R-III	class_IV	IG_1348_genes-complement	tandem						no summit upstream				20.9037	none	1	0	0	1	0	1
YDR459C	PFA5	R-III	class_IV	IG_1349_genes-complement	divergent						no summit upstream				30.1506	none	0	0	0	1	0	1
YDR460W	TFB3	R-II	class_III	IG_1349_genes-complement	divergent						no summit upstream				30.1506	none	1	0	0	1	0	1
YDR461C-A		R-II	class_I	IG_1352_genes-complement	divergent						no summit upstream				59.0456	none	1	0	1	1	0	1
YDR461W	MFA1	R-II	class_I	IG_1350_genes-complement	tandem						no summit upstream				50.9334	none	1	1	1	1	0	1
YDR462W	MRPL28	R-II	class_III	IG_1352_genes-complement	divergent						no summit upstream				59.0456	none	1	0	0	1	0	1
YDR463W	STP1	R-II	class_I	IG_1353_genes-complement	tandem						no summit upstream				82.6291	none	1	0	1	1	0	1
YDR464W	SPP41	R-II	class_III	IG_1354_genes-complement	tandem	chr04	1388612	1388613	6d_IP_vs_untagged_cer_reps_peak_445	-148	strong	4.17464	313.899	3114	77.7916	any	0	0	0	1	0	1
YDR465C	RMT2	R-II	class_IV	IG_1356_genes-complement	divergent						no summit upstream				29.4713	none	0	0	0	1	0	1
YDR466W	PKH3	R-II	class_III	IG_1356_genes-complement	divergent						no summit upstream				29.4713	none	1	0	0	1	0	1
YDR467C		R-II	class_III	IG_1357_genes-complement	tandem						no summit upstream				17.9901	none	1	0	0	1	0	1
YDR468C	TLG1	R-III	class_IV	IG_1358_genes-complement	divergent						no summit upstream				28.4432	none	1	0	0	1	0	1
YDR469W	SDC1	R-II	class_IV	IG_1358_genes-complement	divergent						no summit upstream				28.4432	none	1	0	0	1	0	1
YDR470C	UGO1	R-III	class_IV	IG_1360_genes-complement	divergent	chr04	1401510	1401511	6d_IP_vs_untagged_cer_reps_peak_446	-211	mild	2.12583	54.9605	534	46.7603	any	1	0	0	1	0	1
YDR471W	RPL27B	R-II	class_IV	IG_1360_genes-complement	divergent	chr04	1401510	1401511	6d_IP_vs_untagged_cer_reps_peak_446	-229	mild	2.12583	54.9605	534	46.7603	any	1	0	0	1	0	1
YDR472W	TRS31	R-III	class_III	IG_1361_genes-complement	tandem	chr04	1402980	1402981	6d_IP_vs_untagged_cer_reps_peak_447	-234	mild	1.85085	33.9096	325	37.8458	any	0	0	0	1	0	1
YDR473C	PRP3	R-III	class_III	IG_1363_genes-complement	tandem						no summit upstream				20.8377	none	0	0	0	0	1	0
YDR475C	JIP4	R-III	class_IV	IG_1364_genes-complement	tandem						no summit upstream				23.9532	none	1	0	0	1	0	1
YDR476C		R-III	class_IV	IG_1365_genes-complement	divergent						no summit upstream				25.5066	none	1	0	0	1	0	1
YDR477W	SNF1	R-II	class_III	IG_1365_genes-complement	divergent						no summit upstream				25.5066	none	1	0	0	1	0	1
YDR478W	SNM1	R-III	class_IV	IG_1366_genes-complement	tandem						no summit upstream				33.0245	none	1	0	0	1	0	1
YDR479C	PEX29	R-III	class_III	IG_1368_genes-complement	divergent						no summit upstream				30.3022	none	1	0	0	1	0	1
YDR480W	DIG2	R-III	class_IV	IG_1368_genes-complement	divergent						no summit upstream				30.3022	none	1	0	0	1	0	1
YDR481C	PHO8	R-II	class_III	IG_1370_genes-complement	tandem						no summit upstream				54.7883	none	1	0	0	1	0	1
YDR482C	CWC21	R-II	class_II	IG_1371_genes-complement	divergent						no summit upstream				51.1968	none	0	0	1	0	1	0
YDR483W	KRE2	R-I	class_III	IG_1371_genes-complement	divergent						no summit upstream				51.1968	none	1	0	0	1	0	1
YDR484W	VPS52	R-III	class_IV	IG_1372_genes-complement	tandem						no summit upstream				26.9739	none	0	0	0	1	0	1
YDR485C	VPS72	R-II	class_III	IG_1374_genes-complement	tandem						no summit upstream				31.0183	none	0	0	0	1	0	1
YDR486C	VPS60	R-III	class_III	IG_1375_genes-complement	tandem						no summit upstream				26.0126	none	1	0	0	1	0	1
YDR487C	RIB3	R-II	class_IV	IG_1376_genes-complement	tandem	chr04	1429185	1429186	6d_IP_vs_untagged_cer_reps_peak_449	-143	strong	4.43531	356.487	3539	94.2956	any	1	0	0	1	0	1
YDR488C	PAC11	R-III	class_IV	IG_1377_genes-complement	divergent						no summit upstream				40.387	none	0	0	0	0	1	0
YDR489W	SLD5	R-II	class_IV	IG_1377_genes-complement	divergent						no summit upstream				40.387	none	0	0	0	1	0	1
YDR490C	PKH1	R-III	class_IV	IG_1379_genes-complement	tandem						no summit upstream				67.2198	none	1	0	0	1	0	1
YDR493W	MZM1	R-III	class_IV	IG_1380_genes-complement	tandem						no summit upstream				28.3085	none	1	0	0	1	0	1
YDR494W	RSM28	R-III	class_III	IG_1381_genes-complement	tandem						no summit upstream				32.6885	none	1	0	0	1	0	1
YDR495C	VPS3	R-III	class_III	IG_1383_genes-complement	tandem						no summit upstream				27.3138	none	0	0	0	1	0	1
YDR496C	PUF6	R-II	class_IV	IG_1384_genes-complement	tandem						no summit upstream				31.5269	none	0	0	0	1	0	1
YDR497C	ITR-I	R-II	class_III	IG_1385_genes-complement	tandem	chr04	1445643	1445644	6d_IP_vs_untagged_cer_reps_peak_451	-104	mild	1.43918	10.7468	96	39.4256	any	1	0	0	1	0	1
YDR498C	SEC20	R-III	class_IV	IG_1386_genes-complement	divergent	chr04	1447689	1447690	6d_IP_vs_untagged_cer_reps_peak_452	-655	mild	1.43441	10.585	94	37.459	any	1	0	0	1	0	1
YDR499W	LCD1	R-III	class_IV	IG_1386_genes-complement	divergent	chr04	1447689	1447690	6d_IP_vs_untagged_cer_reps_peak_452	-106	mild	1.43441	10.585	94	37.459	any	1	0	0	1	0	1
YDR500C	RPL37B	R-II	class_IV	IG_1388_genes-complement	divergent	chr04	1451007	1451008	6d_IP_vs_untagged_cer_reps_peak_453	-132	strong	3.04771	152.721	1507	66.9079	any	1	0	0	1	0	1
YDR501W	PLM2	R-III	class_IV	IG_1388_genes-complement	divergent	chr04	1451007	1451008	6d_IP_vs_untagged_cer_reps_peak_453	-312	strong	3.04771	152.721	1507	66.9079	any	0	0	0	1	0	1
YDR502C	SAM2	R-II	class_IV	IG_1390_genes-complement	tandem						no summit upstream				33.4078	none	1	0	0	1	0	1
YDR503C	LPP1	R-III	class_IV	IG_1391_genes-complement	tandem	chr04	1456097	1456098	6d_IP_vs_untagged_cer_reps_peak_454	-189	mild	1.7221	25.491	241	46.5218	any	0	0	0	1	0	1
YDR505C	PSP1	RØ	class_III	IG_1392_genes-complement	tandem	chr04	1459643	1459644	6d_IP_vs_untagged_cer_reps_peak_457	-318	strong	4.77228	414.328	4116	106.267	any	1	0	0	1	0	1
YDR506C	GMC1	R-III	class_IV	IG_1393_genes-complement	tandem	chr04	1461741	1461742	6d_IP_vs_untagged_cer_reps_peak_458	-187	mild	1.34063	7.05395	60	37.2983	any	0	0	0	0	1	0
YDR507C	GIN4	R-III	class_IV	IG_1394_genes-complement	tandem	chr04	1466078	1466079	6d_IP_vs_untagged_cer_reps_peak_459	-181	mild	1.80793	30.9903	296	38.7981	any	0	0	0	1	0	1
YDR510C-A		R-III	class_IV	IG_1396_genes-complement	divergent						no summit upstream				32.2754	none	1	0	0	1	0	1
YDR510W	SMT3	R-II	class_III	IG_1395_genes-complement	tandem	chr04	1468898	1468899	6d_IP_vs_untagged_cer_reps_peak_460	-448	strong	5.79748	604.79	6018	111.27	any	1	0	0	1	0	1
YDR511W	SDH7	R-III	class_IV	IG_1396_genes-complement	divergent						no summit upstream				32.2754	none	1	0	0	1	0	1
YDR514C		R-III	class_IV	IG_1399_genes-complement	divergent						no summit upstream				25.1372	none	1	0	0	1	0	1
YDR515W	SLF1	R-III	class_IV	IG_1399_genes-complement	divergent						no summit upstream				25.1372	none	0	0	0	0	1	0
YDR516C	EMI2	R-III	class_IV	IG_1401_genes-complement	divergent	chr04	1476811	1476812	6d_IP_vs_untagged_cer_reps_peak_462	-282	mild	1.51865	14.2199	130	36.0372	any	0	0	0	0	1	0
YDR517W	GRH1	R-III	class_IV	IG_1401_genes-complement	divergent	chr04	1476811	1476812	6d_IP_vs_untagged_cer_reps_peak_462	-348	mild	1.51865	14.2199	130	36.0372	any	0	0	0	1	0	1
YDR518W	EUG1	R-III	class_IV	IG_1402_genes-complement	tandem						no summit upstream				35.6563	none	0	0	0	1	0	1
YDR519W	FPR-II	R-II	class_III	IG_1403_genes-complement	tandem						no summit upstream				30.9081	none	1	0	0	1	0	1
YDR522C	SPS2	R-III	class_IV	IG_1406_genes-complement	tandem						no summit upstream				29.1726	none	0	0	0	0	1	0
YDR523C	SPS1	R-III	class_IV	IG_1407_genes-complement	tandem						no summit upstream				31.5656	none	0	0	0	0	1	0
YDR524C	AGE1	R-II	class_III	IG_1408_genes-complement	divergent						no summit upstream				49.0211	none	1	0	0	1	0	1
YDR524C-B		R-I	class_I	IG_1410_genes-complement	tandem						no summit upstream				47.5843	none	1	0	1	1	0	1
YDR524W-C		R-I	class_IV	IG_1408_genes-complement	divergent						no summit upstream				49.0211	none	1	0	0	1	0	1
YDR525W-A	SNA2	R-II	class_I	IG_1411_genes-complement	tandem	chr04	1490359	1490360	6d_IP_vs_untagged_cer_reps_peak_464	-183	strong	3.83291	261.332	2590	111.608	any	1	0	1	1	0	1
YDR528W	HLR-I	R-II	class_IV	IG_1413_genes-complement	tandem	chr04	1494122	1494123	6d_IP_vs_untagged_cer_reps_peak_466	-352	strong	2.51842	92.0775	903	36.6168	any	1	0	0	1	0	1
YDR528W	HLR-I	R-II	class_IV	IG_1413_genes-complement	tandem	chr04	1493361	1493362	6d_IP_vs_untagged_cer_reps_peak_465	-1113	mild	1.52183	14.4053	132	36.6168	any	1	0	0	1	0	1
YDR529C	QCR7	R-II	class_III	IG_1415_genes-complement	tandem	chr04	1496722	1496723	6d_IP_vs_untagged_cer_reps_peak_467	-144	mild	2.27365	68.049	664	70.3452	any	1	0	0	1	0	1
YDR530C	APA2	R-III	class_III	IG_1416_genes-complement	divergent						no summit upstream				29.4815	none	1	0	0	1	0	1
YDR531W	CAB1	R-III	class_IV	IG_1416_genes-complement	divergent						no summit upstream				29.4815	none	1	0	0	1	0	1
YDR532C	KRE28	R-III	class_IV	IG_1418_genes-complement	tandem						no summit upstream				28.6295	none	1	0	0	0	0	1
YDR533C	HSP31	R-III	class_III	IG_1419_genes-complement	tandem	chr04	1502422	1502423	6d_IP_vs_untagged_cer_reps_peak_468	-208	strong	4.2112	320.143	3177	58.1354	any	1	0	0	1	0	1
YDR534C	FIT1	R-III	class_IV	IG_1420_genes-complement	tandem						no summit upstream				18.3014	none	0	0	0	0	1	0
YDR535C		R-III	class_IV	IG_1421_genes-complement	divergent	chr04	1507474	1507475	6d_IP_vs_untagged_cer_reps_peak_469	-112	strong	3.09063	158.1	1561	55.2815	any	0	0	0	0	1	0
YDR536W	STL1	R-III	class_III	IG_1421_genes-complement	divergent	chr04	1507474	1507475	6d_IP_vs_untagged_cer_reps_peak_469	-479	strong	3.09063	158.1	1561	55.2815	any	1	0	0	0	0	1
YDR539W	FDC1	R-III	class_IV	IG_1423_genes-complement	tandem						no summit upstream				24.589	none	0	0	0	1	0	1
YDR540C	IRC4	R-III	class_IV	IG_1425_genes-complement	tandem						no summit upstream				19.7552	none	0	0	0	0	1	0
YDR541C		R-III	class_IV	IG_1426_genes-complement	divergent						no summit upstream				22.7255	none	0	0	0	0	1	0
YDR542W	PAU10	R-III	class_IV	IG_1426_genes-complement	divergent						no summit upstream				22.7255	none	0	0	0	0	1	0
YDR543C		R-III	class_IV	IG_1428_genes-complement	tandem						no summit upstream				34.2453	none	0	0	0	0	1	0
YDR544C		R-III	class_II	IG_1429_genes-complement	divergent	chr04	1525663	1525664	6d_IP_vs_untagged_cer_reps_peak_470	-140	strong	2.95885	250.255	2480	93.7832	any	0	0	1	0	1	0
YDR545W	YRF1-1	R-III	class_III	IG_1429_genes-complement	divergent	chr04	1525663	1525664	6d_IP_vs_untagged_cer_reps_peak_470	-658	strong	2.95885	250.255	2480	93.7832	any	1	0	0	1	0	1
YEL001C	IRC22	R-III	class_IV	IG_1508_genes-complement	divergent	chr05	152910	152911	6d_IP_vs_untagged_cer_reps_peak_501	-1898	strong	3.7137	243.393	2411	47.6703	any	0	0	0	1	0	1
YEL002C	WBP1	R-III	class_IV	IG_1507_genes-complement	tandem						no summit upstream				29.8421	none	1	0	0	1	0	1
YEL003W	GIM4	R-II	class_IV	IG_1505_genes-complement	tandem						no summit upstream				38.7739	none	1	0	0	1	0	1
YEL004W	YEA4	R-III	class_IV	IG_1504_genes-complement	divergent						no summit upstream				30.3809	none	1	0	0	0	0	1
YEL005C	VAB2	R-III	class_III	IG_1504_genes-complement	divergent						no summit upstream				30.3809	none	1	0	0	0	0	1
YEL006W	YEA6	R-III	class_III	IG_1502_genes-complement	tandem	chr05	144202	144203	6d_IP_vs_untagged_cer_reps_peak_500	-59	mild	1.37242	8.15497	70	36.613	any	1	0	0	1	0	1
YEL007W	MIT1	R-I	class_III	IG_1501_genes-complement	tandem						no summit upstream				79.8234	none	1	0	0	1	0	1
YEL008W		R-III	class_II	IG_1500_genes-complement	divergent						no summit upstream				59.2679	none	1	0	1	1	0	1
YEL009C	GCN4	R-II	class_III	IG_1500_genes-complement	divergent						no summit upstream				59.2679	none	1	0	0	1	0	1
YEL009C-A		R-III	class_IV	IG_1499_genes-complement	tandem	chr05	138764	138765	6d_IP_vs_untagged_cer_reps_peak_498	-1910	strong	3.186	170.064	1680	27.8651	any	0	0	0	0	1	0
YEL010W		R-III	class_IV	IG_1498_genes-complement	tandem	chr05	135419	135420	6d_IP_vs_untagged_cer_reps_peak_497	-782	strong	4.83109	424.577	4219	57.0735	any	0	0	0	0	1	0
YEL011W	GLC3	RØ	class_I	IG_1497_genes-complement	tandem						no summit upstream				73.7111	none	1	1	1	0	0	1
YEL012W	UBC8	R-II	class_III	IG_1496_genes-complement	tandem	chr05	131222	131223	6d_IP_vs_untagged_cer_reps_peak_496	-442	mild	1.95099	40.9486	395	41.9592	any	1	0	0	0	0	1
YEL013W	VAC8	R-III	class_III	IG_1495_genes-complement	divergent						no summit upstream				23.0153	none	1	0	0	1	0	1
YEL014C		R-III	class_III	IG_1495_genes-complement	divergent						no summit upstream				23.0153	none	1	0	0	1	0	1
YEL015W	EDC3	R-II	class_IV	IG_1493_genes-complement	divergent						no summit upstream				28.7186	none	1	0	0	1	0	1
YEL016C	NPP2	R-III	class_IV	IG_1493_genes-complement	divergent						no summit upstream				28.7186	none	0	0	0	1	0	1
YEL017C-A	PMP2	R-I	class_IV	IG_1491_genes-complement	divergent	chr05	123275	123276	6d_IP_vs_untagged_cer_reps_peak_495	-275	mild	2.16397	58.297	567	61.1832	any	1	0	0	1	0	1
YEL017W	GTT3	R-III	class_IV	IG_1491_genes-complement	divergent	chr05	123275	123276	6d_IP_vs_untagged_cer_reps_peak_495	-344	mild	2.16397	58.297	567	61.1832	any	0	0	0	1	0	1
YEL019C	MMS21	R-III	class_IV	IG_1489_genes-complement	tandem						no summit upstream				28.691	none	0	0	0	0	1	0
YEL020C	PXP1	R-III	class_IV	IG_1488_genes-complement	tandem						no summit upstream				30.1518	none	1	0	0	0	0	1
YEL021W	URA3	R-II	class_IV	IG_1485_genes-complement	tandem	chr05	116044	116045	6d_IP_vs_untagged_cer_reps_peak_493	-84	mild	1.3042	7.46709	64	47.0855	any	1	0	0	1	0	1
YEL022W	GEA2	R-III	class_IV	IG_1484_genes-complement	divergent						no summit upstream				25.5324	none	0	0	0	1	0	1
YEL023C		R-III	class_IV	IG_1484_genes-complement	divergent						no summit upstream				25.5324	none	0	0	0	0	1	0
YEL024W	RIP1	R-II	class_III	IG_1482_genes-complement	divergent	chr05	106964	106965	6d_IP_vs_untagged_cer_reps_peak_492	-212	mild	1.64104	20.6801	194	36.4194	any	1	0	0	1	0	1
YEL025C		R-III	class_IV	IG_1482_genes-complement	divergent	chr05	106964	106965	6d_IP_vs_untagged_cer_reps_peak_492	-728	mild	1.64104	20.6801	194	36.4194	any	0	0	0	1	0	1
YEL026W	SNU13	R-I	class_IV	IG_1480_genes-complement	tandem	chr05	101814	101815	6d_IP_vs_untagged_cer_reps_peak_491	-32	mild	1.53137	14.9678	137	37.344	any	1	0	0	1	0	1
YEL027W	VMA3	R-I	class_III	IG_1479_genes-complement	tandem	chr05	100057	100058	6d_IP_vs_untagged_cer_reps_peak_490	-641	mild	2.14172	56.2856	547	40.3065	any	1	0	0	1	0	1
YEL028W		R-II	class_IV	IG_1478_genes-complement	divergent						no summit upstream				29.8027	none	1	0	0	1	0	1
YEL029C	BUD16	R-III	class_IV	IG_1478_genes-complement	divergent						no summit upstream				29.8027	none	0	0	0	1	0	1
YEL031W	SPF1	R-II	class_III	IG_1475_genes-complement	tandem	chr05	90211	90212	6d_IP_vs_untagged_cer_reps_peak_489	-12	mild	1.66647	22.0098	207	40.2373	any	1	0	0	1	0	1
YEL032W	MCM3	R-II	class_IV	IG_1474_genes-complement	tandem						no summit upstream				78.6824	none	0	0	0	1	0	1
YEL035C	UTR5	R-III	class_II	IG_1473_genes-complement	tandem						no summit upstream				53.6122	none	1	0	1	1	0	1
YEL036C	ANP1	R-II	class_IV	IG_1472_genes-complement	tandem						no summit upstream				63.5129	none	1	0	0	1	0	1
YEL037C	RAD23	R-II	class_III	IG_1471_genes-complement	tandem	chr05	82896	82897	6d_IP_vs_untagged_cer_reps_peak_487	-173	mild	1.75548	27.4375	261	46.1429	any	1	0	0	1	0	1
YEL038W	UTR4	R-III	class_IV	IG_1469_genes-complement	divergent	chr05	80258	80259	6d_IP_vs_untagged_cer_reps_peak_486	-169	mild	1.79999	30.4715	291	46.9627	any	0	0	0	1	0	1
YEL039C	CYC7	R-III	class_IV	IG_1469_genes-complement	divergent	chr05	80258	80259	6d_IP_vs_untagged_cer_reps_peak_486	-194	mild	1.79999	30.4715	291	46.9627	any	0	0	0	1	0	1
YEL040W	UTR-II	R-III	class_IV	IG_1467_genes-complement	tandem	chr05	77823	77824	6d_IP_vs_untagged_cer_reps_peak_485	-212	mild	1.48686	12.7769	116	36.0495	any	0	0	0	1	0	1
YEL041W	YEF1	R-III	class_IV	IG_1466_genes-complement	tandem						no summit upstream				23.7282	none	0	0	0	0	1	0
YEL042W	GDA1	R-II	class_IV	IG_1465_genes-complement	tandem						no summit upstream				32.8235	none	0	0	0	1	0	1
YEL043W		R-II	class_III	IG_1464_genes-complement	tandem	chr05	70316	70317	6d_IP_vs_untagged_cer_reps_peak_484	-112	mild	1.31997	6.27921	52	40.9771	any	0	0	0	1	0	1
YEL044W	IES6	R-II	class_IV	IG_1463_genes-complement	divergent						no summit upstream				73.4409	none	1	0	0	1	0	1
YEL045C		R-II	class_II	IG_1463_genes-complement	divergent						no summit upstream				73.4409	none	1	0	1	1	0	1
YEL046C	GLY1	R-I	class_IV	IG_1462_genes-complement	tandem						no summit upstream				48.6378	none	1	0	0	1	0	1
YEL047C		R-III	class_IV	IG_1461_genes-complement	tandem						no summit upstream				26.3066	none	0	0	0	1	0	1
YEL048C	TCA17	R-III	class_IV	IG_1460_genes-complement	tandem						no summit upstream				21.6962	none	0	0	0	1	0	1
YEL049W	PAU2	R-III	class_IV	IG_1458_genes-complement	divergent	chr05	61971	61972	6d_IP_vs_untagged_cer_reps_peak_482	-1705	mild	1.41852	9.94947	88	25.9344	any	0	0	0	1	0	1
YEL050C	RML2	R-II	class_IV	IG_1458_genes-complement	divergent	chr05	61971	61972	6d_IP_vs_untagged_cer_reps_peak_482	-1072	mild	1.41852	9.94947	88	25.9344	any	1	0	0	1	0	1
YEL050W-A		R-III	class_IV	IG_1457_genes-complement	tandem						no summit upstream				29.906	none	1	0	0	1	0	1
YEL051W	VMA8	R-II	class_III	IG_1456_genes-complement	tandem						no summit upstream				32.8373	none	1	0	0	1	0	1
YEL052W	AFG1	R-III	class_IV	IG_1455_genes-complement	divergent						no summit upstream				23.5763	none	0	0	0	0	1	0
YEL053C	MAK10	R-III	class_IV	IG_1455_genes-complement	divergent						no summit upstream				23.5763	none	0	0	0	1	0	1
YEL055C	POL5	R-II	class_IV	IG_1453_genes-complement	tandem	chr05	51711	51712	6d_IP_vs_untagged_cer_reps_peak_480	-116	mild	1.56475	16.5154	153	26.5848	any	0	0	0	1	0	1
YEL056W	HAT2	R-III	class_IV	IG_1451_genes-complement	divergent	chr05	46610	46611	6d_IP_vs_untagged_cer_reps_peak_479	-508	mild	2.25775	66.6196	650	38.2332	any	0	0	0	1	0	1
YEL057C	SDD1	R-III	class_IV	IG_1451_genes-complement	divergent	chr05	46610	46611	6d_IP_vs_untagged_cer_reps_peak_479	-809	mild	2.25775	66.6196	650	38.2332	any	1	0	0	1	0	1
YEL058W	PCM1	R-III	class_IV	IG_1449_genes-complement	tandem						no summit upstream				42.5001	none	1	0	0	1	0	1
YEL059C-A	SOM1	R-III	class_II	IG_1448_genes-complement	divergent						no summit upstream				58.7078	none	1	0	1	0	0	1
YEL059W	HHY1	R-III	class_II	IG_1448_genes-complement	divergent						no summit upstream				58.7078	none	0	0	1	0	1	0
YEL060C	PRB1	RØ	class_I	IG_1447_genes-complement	tandem	chr05	42228	42229	6d_IP_vs_untagged_cer_reps_peak_478	-223	strong	7.20575	898.599	8952	158.358	any	1	1	1	1	0	1
YEL061C	CIN8	R-III	class_IV	IG_1446_genes-complement	tandem						no summit upstream				65.7472	none	0	0	0	1	0	1
YEL062W	NPR-II	R-II	class_IV	IG_1444_genes-complement	divergent	chr05	33843	33844	6d_IP_vs_untagged_cer_reps_peak_477	-543	strong	2.82201	125.49	1236	50.056	any	0	0	0	1	0	1
YEL063C	CAN1	R-II	class_III	IG_1444_genes-complement	divergent	chr05	33843	33844	6d_IP_vs_untagged_cer_reps_peak_477	-321	strong	2.82201	125.49	1236	50.056	any	1	0	0	1	0	1
YEL064C	AVT2	R-III	class_IV	IG_1443_genes-complement	tandem						no summit upstream				27.5396	none	0	0	0	1	0	1
YEL065W	SIT1	R-III	class_IV	IG_1441_genes-complement	tandem						no summit upstream				24.6293	none	0	0	0	0	1	0
YEL068C		R-III	class_IV	IG_1440_genes-complement	tandem						no summit upstream				23.9256	none	0	0	0	0	1	0
YEL069C	HXT13	R-III	class_IV	IG_1439_genes-complement	tandem	chr05	23707	23708	6d_IP_vs_untagged_cer_reps_peak_476	-422	mild	1.82701	32.3035	309	23.8086	any	0	0	0	0	1	0
YEL070W	DSF1	R-III	class_III	IG_1437_genes-complement	tandem	chr05	18958	18959	6d_IP_vs_untagged_cer_reps_peak_475	-599	strong	2.91102	136.056	1341	39.9296	any	0	0	0	0	1	0
YEL071W	DLD3	R-II	class_IV	IG_1436_genes-complement	tandem	chr05	16145	16146	6d_IP_vs_untagged_cer_reps_peak_474	-182	strong	3.186	170.064	1680	38.4451	any	1	0	0	1	0	1
YEL072W	RMD6	R-II	class_IV	IG_1435_genes-complement	divergent	chr05	13442	13443	6d_IP_vs_untagged_cer_reps_peak_473	-184	mild	2.07973	51.0615	495	22.0042	any	0	0	0	0	1	0
YEL073C		R-II	class_IV	IG_1435_genes-complement	divergent	chr05	13442	13443	6d_IP_vs_untagged_cer_reps_peak_473	-5889	mild	2.07973	51.0615	495	22.0042	any	0	0	0	0	1	0
YEL074W		R-III	class_II	IG_1433_genes-complement	divergent						no summit upstream				43.5601	none	0	0	1	1	0	1
YEL075C		R-III	class_IV	IG_1433_genes-complement	divergent						no summit upstream				43.5601	none	0	0	0	1	0	1
YEL077C		R-III	class_III	IG_1432_genes-complement	tandem						no summit upstream				25.6632	none	1	0	0	1	0	1
YER001W	MNN1	R-I	class_IV	IG_1508_genes-complement	divergent	chr05	152910	152911	6d_IP_vs_untagged_cer_reps_peak_501	-561	strong	3.7137	243.393	2411	47.6703	any	1	0	0	1	0	1
YER002W	NOP16	R-II	class_III	IG_1509_genes-complement	tandem						no summit upstream				27.7775	none	0	0	0	1	0	1
YER003C	PMI40	R-III	class_IV	IG_1511_genes-complement	divergent	chr05	159315	159316	6d_IP_vs_untagged_cer_reps_peak_502	-162	mild	1.51706	14.2199	130	41.4137	any	0	0	0	1	0	1
YER004W	FMP52	R-II	class_III	IG_1511_genes-complement	divergent	chr05	159315	159316	6d_IP_vs_untagged_cer_reps_peak_502	-245	mild	1.51706	14.2199	130	41.4137	any	1	0	0	1	0	1
YER005W	YND1	R-II	class_III	IG_1512_genes-complement	tandem						no summit upstream				40.7858	none	1	0	0	1	0	1
YER006W	NUG1	R-II	class_IV	IG_1513_genes-complement	tandem						no summit upstream				28.8455	none	0	0	0	1	0	1
YER007C-A	TMA20	R-III	class_IV	IG_1516_genes-complement	tandem						no summit upstream				27.35	none	1	0	0	1	0	1
YER008C	SEC3	R-II	class_III	IG_1517_genes-complement	divergent						no summit upstream				28.9533	none	1	0	0	1	0	1
YER009W	NTF2	R-II	class_IV	IG_1517_genes-complement	divergent						no summit upstream				28.9533	none	1	0	0	1	0	1
YER010C		R-III	class_III	IG_1519_genes-complement	divergent	chr05	174815	174816	6d_IP_vs_untagged_cer_reps_peak_504	-1449	mild	2.20212	61.7113	601	32.2638	any	0	0	0	1	0	1
YER011W	TIR-I	R-III	class_IV	IG_1519_genes-complement	divergent	chr05	174815	174816	6d_IP_vs_untagged_cer_reps_peak_504	-376	mild	2.20212	61.7113	601	32.2638	any	0	0	0	1	0	1
YER012W	PRE1	R-III	class_IV	IG_1520_genes-complement	tandem	chr05	177126	177127	6d_IP_vs_untagged_cer_reps_peak_505	-649	strong	3.18282	170.064	1680	38.8614	any	1	0	0	1	0	1
YER012W	PRE1	R-III	class_IV	IG_1520_genes-complement	tandem	chr05	177640	177641	6d_IP_vs_untagged_cer_reps_peak_506	-135	mild	1.50594	13.6705	125	38.8614	any	1	0	0	1	0	1
YER013W	PRP22	R-III	class_IV	IG_1521_genes-complement	tandem						no summit upstream				30.1645	none	0	0	0	0	1	0
YER014W	HEM14	R-III	class_IV	IG_1522_genes-complement	tandem						no summit upstream				25.0193	none	0	0	0	0	1	0
YER016W	BIM1	R-III	class_IV	IG_1523_genes-complement	tandem						no summit upstream				26.0887	none	0	0	0	1	0	1
YER017C	AFG3	R-II	class_III	IG_1525_genes-complement	tandem	chr05	191810	191811	6d_IP_vs_untagged_cer_reps_peak_507	60	mild	1.71416	25.014	237	45.8378	any	1	0	0	1	0	1
YER018C	SPC25	R-III	class_IV	IG_1526_genes-complement	divergent						no summit upstream				41.2829	none	0	0	0	0	1	0
YER019C-A	SBH2	R-II	class_III	IG_1528_genes-complement	divergent	chr05	194893	194894	6d_IP_vs_untagged_cer_reps_peak_508	-296	strong	2.62492	103.205	1014	67.4129	any	1	0	0	1	0	1
YER019W	ISC1	R-III	class_IV	IG_1526_genes-complement	divergent						no summit upstream				41.2829	none	1	0	0	1	0	1
YER020W	GPA2	R-II	class_III	IG_1528_genes-complement	divergent	chr05	194893	194894	6d_IP_vs_untagged_cer_reps_peak_508	-198	strong	2.62492	103.205	1014	67.4129	any	1	0	0	0	0	1
YER021W	RPN3	R-II	class_III	IG_1529_genes-complement	tandem	chr05	196869	196870	6d_IP_vs_untagged_cer_reps_peak_510	-47	mild	1.62832	20.029	187	39.9868	any	1	0	0	1	0	1
YER022W	SRB4	R-III	class_IV	IG_1530_genes-complement	tandem						no summit upstream				29.496	none	0	0	0	1	0	1
YER023W	PRO3	R-III	class_IV	IG_1531_genes-complement	tandem						no summit upstream				29.379	none	1	0	0	1	0	1
YER024W	YAT2	R-II	class_III	IG_1532_genes-complement	tandem						no summit upstream				73.9547	none	1	0	0	1	0	1
YER025W	GCD11	R-II	class_III	IG_1533_genes-complement	tandem	chr05	205034	205035	6d_IP_vs_untagged_cer_reps_peak_512	-170	mild	1.78568	29.4451	281	52.6048	any	1	0	0	1	0	1
YER026C	CHO1	R-II	class_III	IG_1535_genes-complement	tandem						no summit upstream				33.3062	none	1	0	0	1	0	1
YER027C	GAL83	R-III	class_III	IG_1536_genes-complement	tandem						no summit upstream				34.63	none	1	0	0	0	0	1
YER028C	MIG3	R-III	class_IV	IG_1537_genes-complement	tandem	chr05	212337	212338	6d_IP_vs_untagged_cer_reps_peak_514	-410	mild	1.33427	6.7908	57	37.7393	any	0	0	0	0	1	0
YER029C	SMB1	R-III	class_IV	IG_1538_genes-complement	divergent						no summit upstream				39.7885	none	0	0	0	1	0	1
YER030W	CHZ1	R-III	class_III	IG_1538_genes-complement	divergent						no summit upstream				39.7885	none	1	0	0	1	0	1
YER031C	YPT31	R-III	class_IV	IG_1540_genes-complement	divergent						no summit upstream				38.8974	none	1	0	0	1	0	1
YER032W	FIR-I	R-III	class_IV	IG_1540_genes-complement	divergent						no summit upstream				38.8974	none	0	0	0	1	0	1
YER033C	ZRG8	R-II	class_III	IG_1542_genes-complement	divergent						no summit upstream				53.5321	none	0	0	0	0	1	0
YER034W		R-III	class_II	IG_1542_genes-complement	divergent						no summit upstream				53.5321	none	1	0	1	0	0	1
YER035W	EDC2	R-II	class_I	IG_1543_genes-complement	tandem						no summit upstream				71.8587	none	1	0	1	1	0	1
YER036C	ARB1	R-I	class_III	IG_1545_genes-complement	divergent	chr05	225589	225590	6d_IP_vs_untagged_cer_reps_peak_516	-353	strong	4.05543	295.413	2930	66.3846	any	1	0	0	1	0	1
YER037W	PHM8	R-I	class_IV	IG_1545_genes-complement	divergent	chr05	225589	225590	6d_IP_vs_untagged_cer_reps_peak_516	-270	strong	4.05543	295.413	2930	66.3846	any	1	0	0	1	0	1
YER038C	KRE29	R-III	class_IV	IG_1547_genes-complement	divergent						no summit upstream				24.2658	none	1	0	0	0	0	1
YER038W-A	FMP49	R-III	class_IV	IG_1547_genes-complement	divergent						no summit upstream				24.2658	none	1	0	0	0	0	1
YER039C	HVG1	R-III	class_IV	IG_1548_genes-complement	tandem						no summit upstream				22.3373	none	1	0	0	0	0	1
YER039C-A		R-III	class_III	IG_1549_genes-complement	divergent						no summit upstream				30.8501	none	1	0	0	1	0	1
YER040W	GLN3	R-II	class_III	IG_1549_genes-complement	divergent						no summit upstream				30.8501	none	1	0	0	1	0	1
YER041W	YEN1	R-II	class_IV	IG_1550_genes-complement	tandem						no summit upstream				25.74	none	0	0	0	0	1	0
YER042W	MXR-I	R-III	class_IV	IG_1551_genes-complement	tandem						no summit upstream				29.6053	none	1	0	0	1	0	1
YER043C	SAH1	R-I	class_IV	IG_1553_genes-complement	tandem	chr05	237347	237348	6d_IP_vs_untagged_cer_reps_peak_517	-199	mild	1.75866	27.6851	263	43.8541	any	1	0	0	1	0	1
YER044C	ERG28	R-III	class_IV	IG_1554_genes-complement	tandem	chr05	238216	238217	6d_IP_vs_untagged_cer_reps_peak_518	-144	mild	1.41057	9.63864	85	39.768	any	1	0	0	1	0	1
YER044C-A	MEI4	R-III	class_IV	IG_1555_genes-complement	tandem						no summit upstream				18.0022	none	0	0	0	1	0	1
YER045C	ACA1	R-II	class_IV	IG_1556_genes-complement	divergent	chr05	242263	242264	6d_IP_vs_untagged_cer_reps_peak_519	-670	mild	1.79045	29.7003	283	34.4865	any	0	0	0	1	0	1
YER046W	SPO73	R-II	class_IV	IG_1556_genes-complement	divergent	chr05	242263	242264	6d_IP_vs_untagged_cer_reps_peak_519	-855	mild	1.79045	29.7003	283	34.4865	any	1	0	0	1	0	1
YER046W-A		R-III	class_III	IG_1557_genes-complement	tandem						no summit upstream				27.4196	none	1	0	0	1	0	1
YER047C	SAP1	R-II	class_III	IG_1558_genes-complement	tandem						no summit upstream				32.2824	none	1	0	0	1	0	1
YER048C	CAJ1	R-II	class_III	IG_1559_genes-complement	divergent	chr05	250271	250272	6d_IP_vs_untagged_cer_reps_peak_520	-2031	mild	1.57905	17.3149	161	27.432	any	0	0	0	1	0	1
YER048W-A	ISD11	R-II	class_III	IG_1559_genes-complement	divergent	chr05	250271	250272	6d_IP_vs_untagged_cer_reps_peak_520	-377	mild	1.57905	17.3149	161	27.432	any	1	0	0	1	0	1
YER049W	TPA1	R-II	class_IV	IG_1560_genes-complement	tandem						no summit upstream				34.3338	none	0	0	0	1	0	1
YER050C	RSM18	R-II	class_III	IG_1562_genes-complement	divergent						no summit upstream				35.3596	none	0	0	0	1	0	1
YER051W	JHD1	R-II	class_III	IG_1562_genes-complement	divergent						no summit upstream				35.3596	none	1	0	0	0	0	1
YER052C	HOM3	R-I	class_IV	IG_1564_genes-complement	tandem	chr05	258274	258275	6d_IP_vs_untagged_cer_reps_peak_521	-233	mild	1.60289	18.5457	173	34.8556	any	1	0	0	1	0	1
YER053C	PIC2	R-III	class_IV	IG_1565_genes-complement	tandem	chr05	260294	260295	6d_IP_vs_untagged_cer_reps_peak_522	-568	strong	2.40716	80.67	790	45.0464	any	1	0	0	0	0	1
YER053C-A		R-I	class_III	IG_1566_genes-complement	tandem	chr05	261671	261672	6d_IP_vs_untagged_cer_reps_peak_523	-576	strong	4.33518	339.751	3372	87.9467	any	1	1	0	1	0	1
YER054C	GIP2	R-II	class_I	IG_1567_genes-complement	tandem	chr05	264473	264474	6d_IP_vs_untagged_cer_reps_peak_524	-709	strong	5.36356	520.984	5181	109.683	any	1	0	1	0	0	1
YER055C	HIS1	R-II	class_I	IG_1568_genes-complement	tandem	chr05	266095	266096	6d_IP_vs_untagged_cer_reps_peak_525	-263	mild	1.6013	18.5457	173	40.0241	any	1	1	1	1	0	1
YER056C	FCY2	R-I	class_IV	IG_1569_genes-complement	tandem	chr05	268487	268488	6d_IP_vs_untagged_cer_reps_peak_526	-289	strong	2.7632	118.769	1169	55.9404	any	1	0	0	1	0	1
YER056C-A	RPL34A	R-II	class_IV	IG_1570_genes-complement	tandem	chr05	270402	270403	6d_IP_vs_untagged_cer_reps_peak_527	-189	mild	1.72051	25.252	239	39.8344	any	1	0	0	1	0	1
YER057C	HMF1	R-III	class_IV	IG_1571_genes-complement	divergent						no summit upstream				26.8411	none	1	0	0	1	0	1
YER058W	PET117	R-III	class_IV	IG_1571_genes-complement	divergent						no summit upstream				26.8411	none	0	0	0	1	0	1
YER059W	PCL6	R-III	class_IV	IG_1572_genes-complement	tandem						no summit upstream				27.4659	none	1	0	0	1	0	1
YER060W	FCY21	R-III	class_III	IG_1573_genes-complement	tandem						no summit upstream				21.1491	none	0	0	0	1	0	1
YER060W-A	FCY22	R-III	class_III	IG_1574_genes-complement	tandem						no summit upstream				21.1478	none	1	0	0	1	0	1
YER061C	CEM1	R-III	class_III	IG_1576_genes-complement	tandem						no summit upstream				22.3271	none	1	0	0	0	0	1
YER062C		R-I	class_IV	IG_1577_genes-complement	divergent	chr05	281013	281014	6d_IP_vs_untagged_cer_reps_peak_528	-250	mild	2.05907	49.4711	479	43.456	any	1	0	0	0	0	1
YER063W	THO1	R-II	class_III	IG_1577_genes-complement	divergent	chr05	281013	281014	6d_IP_vs_untagged_cer_reps_peak_528	-633	mild	2.05907	49.4711	479	43.456	any	1	0	0	1	0	1
YER064C	VHR-II	R-I	class_III	IG_1579_genes-complement	tandem	chr05	284711	284712	6d_IP_vs_untagged_cer_reps_peak_529	-417	strong	4.14921	310.173	3077	64.992	any	1	0	0	1	0	1
YER065C	ICL1	R-III	class_III	IG_1580_genes-complement	divergent	chr05	288582	288583	6d_IP_vs_untagged_cer_reps_peak_531	-1631	mild	2.08768	51.7033	502	39.0287	any	1	0	0	1	0	1
YER065C	ICL1	R-III	class_III	IG_1580_genes-complement	divergent	chr05	287314	287315	6d_IP_vs_untagged_cer_reps_peak_530	-363	strong	4.48784	381.143	3785	39.0287	any	1	0	0	1	0	1
YER066W	RRT13	R-III	class_IV	IG_1580_genes-complement	divergent	chr05	288582	288583	6d_IP_vs_untagged_cer_reps_peak_531	-1561	mild	2.08768	51.7033	502	39.0287	any	0	0	0	0	1	0
YER066W	RRT13	R-III	class_IV	IG_1580_genes-complement	divergent	chr05	287314	287315	6d_IP_vs_untagged_cer_reps_peak_530	-2829	strong	4.48784	381.143	3785	39.0287	any	0	0	0	0	1	0
YER067C-A		R-III	class_IV	IG_1582_genes-complement	divergent						no summit upstream				33.7279	none	1	0	0	0	0	1
YER068W	MOT2	R-II	class_III	IG_1582_genes-complement	divergent						no summit upstream				33.7279	none	1	0	0	1	0	1
YER070W	RNR-I	R-II	class_IV	IG_1584_genes-complement	tandem	chr05	298513	298514	6d_IP_vs_untagged_cer_reps_peak_534	-368	strong	2.64558	105.743	1039	45.8391	any	0	0	0	1	0	1
YER071C	TDA2	R-II	class_IV	IG_1586_genes-complement	divergent						no summit upstream				52.7233	none	1	0	0	1	0	1
YER072W	VTC1	R-I	class_I	IG_1586_genes-complement	divergent						no summit upstream				52.7233	none	1	0	1	1	0	1
YER073W	ALD5	R-II	class_IV	IG_1587_genes-complement	tandem	chr05	303554	303555	6d_IP_vs_untagged_cer_reps_peak_535	-398	strong	3.58495	224.777	2226	73.2542	any	1	0	0	1	0	1
YER074W	RPS24A	R-II	class_IV	IG_1588_genes-complement	tandem	chr05	306081	306082	6d_IP_vs_untagged_cer_reps_peak_536	-200	mild	2.13218	55.6215	541	38.5212	any	1	0	0	1	0	1
YER074W-A	YOS1	R-III	class_IV	IG_1589_genes-complement	tandem						no summit upstream				30.0744	none	1	0	0	1	0	1
YER075C	PTP3	R-I	class_III	IG_1591_genes-complement	tandem	chr05	312103	312104	6d_IP_vs_untagged_cer_reps_peak_537	-774	strong	2.43418	83.3706	817	51.5633	any	1	0	0	1	0	1
YER077C	MRX1	R-II	class_IV	IG_1593_genes-complement	tandem						no summit upstream				28.8032	none	0	0	0	1	0	1
YER078C	ICP55	R-III	class_IV	IG_1594_genes-complement	divergent						no summit upstream				26.614	none	0	0	0	1	0	1
YER078W-A		R-III	class_IV	IG_1594_genes-complement	divergent						no summit upstream				26.614	none	0	0	0	0	1	0
YER079W		R-III	class_III	IG_1595_genes-complement	tandem						no summit upstream				22.1277	none	1	0	0	0	0	1
YER081W	SER-III	R-II	class_III	IG_1597_genes-complement	tandem	chr05	322106	322107	6d_IP_vs_untagged_cer_reps_peak_538	-551	mild	2.06066	49.7876	483	47.4044	any	1	0	0	1	0	1
YER082C	UTP7	R-II	class_III	IG_1599_genes-complement	tandem						no summit upstream				35.6843	none	1	0	0	1	0	1
YER083C	GET2	R-II	class_III	IG_1600_genes-complement	divergent						no summit upstream				36.7053	none	0	0	0	1	0	1
YER084W		RØ	class_I	IG_1600_genes-complement	divergent						no summit upstream				36.7053	none	1	1	1	0	0	1
YER084W-A		R-III	class_IV	IG_1601_genes-complement	tandem						no summit upstream				46.9563	none	1	0	0	0	0	1
YER085C		R-III	class_IV	IG_1602_genes-complement	divergent						no summit upstream				39.0635	none	1	0	0	0	0	1
YER086W	ILV1	R-I	class_IV	IG_1602_genes-complement	divergent						no summit upstream				39.0635	none	1	0	0	1	0	1
YER087C-A		R-III	class_IV	IG_1604_genes-complement	tandem						no summit upstream				26.3096	none	1	0	0	1	0	1
YER087C-B	SBH1	R-II	class_III	IG_1605_genes-complement	tandem	chr05	333047	333048	6d_IP_vs_untagged_cer_reps_peak_540	-179	mild	1.66965	22.2349	209	50.1944	any	1	0	0	1	0	1
YER087W	AIM10	R-III	class_IV	IG_1603_genes-complement	tandem						no summit upstream				23.6969	none	0	0	0	1	0	1
YER088C	DOT6	R-I	class_III	IG_1606_genes-complement	tandem	chr05	335488	335489	6d_IP_vs_untagged_cer_reps_peak_541	-216	mild	2.22596	63.7967	622	54.6146	any	1	0	0	1	0	1
YER089C	PTC2	R-II	class_IV	IG_1607_genes-complement	divergent						no summit upstream				30.3089	none	1	0	0	1	0	1
YER090W	TRP2	R-III	class_IV	IG_1607_genes-complement	divergent						no summit upstream				30.3089	none	0	0	0	1	0	1
YER091C	MET6	R-II	class_IV	IG_1609_genes-complement	tandem						no summit upstream				29.4008	none	1	0	0	1	0	1
YER091C-A		R-III	class_II	IG_1610_genes-complement	divergent						no summit upstream				78.8906	none	0	0	1	0	1	0
YER092W	IES5	R-II	class_IV	IG_1610_genes-complement	divergent						no summit upstream				78.8906	none	1	0	0	1	0	1
YER093C	TSC11	R-II	class_IV	IG_1612_genes-complement	tandem						no summit upstream				22.0656	none	1	0	0	1	0	1
YER093C-A	AIM11	R-III	class_IV	IG_1613_genes-complement	tandem						no summit upstream				26.7043	none	1	0	0	1	0	1
YER094C	PUP3	R-II	class_III	IG_1614_genes-complement	divergent	chr05	349799	349800	6d_IP_vs_untagged_cer_reps_peak_544	-361	strong	2.47074	87.2874	856	58.1823	any	1	0	0	1	0	1
YER095W	RAD51	R-II	class_III	IG_1614_genes-complement	divergent	chr05	349799	349800	6d_IP_vs_untagged_cer_reps_peak_544	-130	strong	2.47074	87.2874	856	58.1823	any	0	0	0	1	0	1
YER096W	SHC1	R-III	class_III	IG_1615_genes-complement	tandem	chr05	351438	351439	6d_IP_vs_untagged_cer_reps_peak_545	-168	mild	1.81111	30.9903	296	44.1791	any	1	0	0	0	0	1
YER097W		R-III	class_IV	IG_1616_genes-complement	tandem	chr05	355037	355038	6d_IP_vs_untagged_cer_reps_peak_546	-103	mild	1.66488	22.0098	207	29.2219	any	0	0	0	0	1	0
YER099C	PRS2	R-II	class_III	IG_1618_genes-complement	divergent	chr05	359278	359279	6d_IP_vs_untagged_cer_reps_peak_547	-191	mild	1.3756	8.29801	72	37.8461	any	1	0	0	1	0	1
YER-I00W	UBC6	R-II	class_III	IG_1618_genes-complement	divergent	chr05	359278	359279	6d_IP_vs_untagged_cer_reps_peak_547	-203	mild	1.3756	8.29801	72	37.8461	any	1	0	0	1	0	1
YER-I01C	AST2	R-III	class_III	IG_1620_genes-complement	divergent	chr05	362445	362446	6d_IP_vs_untagged_cer_reps_peak_548	-596	mild	1.95258	41.2415	398	34.8589	any	1	0	0	0	0	1
YER-I02W	RPS8B	R-II	class_III	IG_1620_genes-complement	divergent	chr05	362445	362446	6d_IP_vs_untagged_cer_reps_peak_548	-262	mild	1.95258	41.2415	398	34.8589	any	1	0	0	1	0	1
YER-I03W	SSA4	R-III	class_IV	IG_1621_genes-complement	tandem						no summit upstream				19.9482	none	1	0	0	0	0	1
YER-I04W	RTT105	R-III	class_III	IG_1622_genes-complement	tandem						no summit upstream				26.8563	none	1	0	0	1	0	1
YER-I05C	NUP157	R-II	class_IV	IG_1624_genes-complement	divergent						no summit upstream				24.2877	none	0	0	0	1	0	1
YER-I06W	MAM1	R-III	class_IV	IG_1624_genes-complement	divergent						no summit upstream				24.2877	none	0	0	0	0	1	0
YER-I10C	KAP123	R-II	class_III	IG_1627_genes-complement	tandem						no summit upstream				21.379	none	0	0	0	1	0	1
YER-I11C	SWI4	R-III	class_IV	IG_1628_genes-complement	divergent	chr05	387010	387011	6d_IP_vs_untagged_cer_reps_peak_550	-1012	mild	1.43123	10.4244	93	38.8572	any	0	0	0	1	0	1
YER-I11C	SWI4	R-III	class_IV	IG_1628_genes-complement	divergent	chr05	386345	386346	6d_IP_vs_untagged_cer_reps_peak_549	-347	mild	2.17828	59.6534	581	38.8572	any	0	0	0	1	0	1
YER-I12W	LSM4	R-II	class_III	IG_1628_genes-complement	divergent	chr05	386345	386346	6d_IP_vs_untagged_cer_reps_peak_549	-814	mild	2.17828	59.6534	581	38.8572	any	1	0	0	1	0	1
YER-I12W	LSM4	R-II	class_III	IG_1628_genes-complement	divergent	chr05	387010	387011	6d_IP_vs_untagged_cer_reps_peak_550	-149	mild	1.43123	10.4244	93	38.8572	any	1	0	0	1	0	1
YER-I13C	TMN3	R-III	class_IV	IG_1630_genes-complement	tandem						no summit upstream				29.0627	none	0	0	0	1	0	1
YER-I14C	BOI2	R-II	class_III	IG_1631_genes-complement	tandem	chr05	394047	394048	6d_IP_vs_untagged_cer_reps_peak_551	-298	mild	1.58382	17.5174	163	39.1837	any	1	0	0	1	0	1
YER-I15C	SPR6	R-III	class_III	IG_1632_genes-complement	tandem						no summit upstream				26.5387	none	1	0	0	1	0	1
YER-I16C	SLX8	R-II	class_III	IG_1633_genes-complement	divergent	chr05	396493	396494	6d_IP_vs_untagged_cer_reps_peak_552	-241	mild	2.0845	51.7033	502	44.6878	any	1	0	0	1	0	1
YER-I17W	RPL23B	R-II	class_IV	IG_1633_genes-complement	divergent	chr05	396493	396494	6d_IP_vs_untagged_cer_reps_peak_552	-249	mild	2.0845	51.7033	502	44.6878	any	1	0	0	1	0	1
YER-I18C	SHO1	R-III	class_IV	IG_1635_genes-complement	tandem						no summit upstream				31.1578	none	0	0	0	1	0	1
YER-I19C	AVT6	R-III	class_III	IG_1636_genes-complement	tandem						no summit upstream				27.9986	none	1	0	0	0	0	1
YER-I21W		R-III	class_I	IG_1637_genes-complement	tandem						no summit upstream				72.2729	none	1	1	1	1	0	1
YER-I22C	GLO3	R-I	class_III	IG_1639_genes-complement	divergent						no summit upstream				28.8498	none	1	0	0	1	0	1
YER-I23W	YCK3	R-II	class_III	IG_1639_genes-complement	divergent						no summit upstream				28.8498	none	0	0	0	1	0	1
YER-I24C	DSE1	R-III	class_III	IG_1641_genes-complement	divergent	chr05	409470	409471	6d_IP_vs_untagged_cer_reps_peak_554	-372	mild	1.45507	11.4054	102	31.9238	any	0	0	0	1	0	1
YER-I25W	RSP5	R-II	class_III	IG_1641_genes-complement	divergent	chr05	409470	409471	6d_IP_vs_untagged_cer_reps_peak_554	-677	mild	1.45507	11.4054	102	31.9238	any	1	0	0	1	0	1
YER-I26C	NSA2	R-II	class_IV	IG_1643_genes-complement	divergent						no summit upstream				33.9344	none	1	0	0	1	0	1
YER-I27W	LCP5	R-II	class_IV	IG_1643_genes-complement	divergent						no summit upstream				33.9344	none	0	0	0	1	0	1
YER-I28W	VFA1	R-III	class_IV	IG_1644_genes-complement	tandem						no summit upstream				23.2018	none	1	0	0	1	0	1
YER-I29W	SAK1	R-II	class_III	IG_1645_genes-complement	tandem						no summit upstream				28.9584	none	0	0	0	1	0	1
YER-I30C	COM2	R-II	class_IV	IG_1647_genes-complement	divergent	chr05	423356	423357	6d_IP_vs_untagged_cer_reps_peak_555	-837	strong	3.32905	189.105	1870	55.6645	any	1	0	0	1	0	1
YER-I31W	RPS26B	R-I	class_IV	IG_1647_genes-complement	divergent	chr05	423356	423357	6d_IP_vs_untagged_cer_reps_peak_555	-174	strong	3.32905	189.105	1870	55.6645	any	1	0	0	1	0	1
YER-I32C	PMD1	R-II	class_III	IG_1649_genes-complement	divergent	chr05	431382	431383	6d_IP_vs_untagged_cer_reps_peak_556	-817	mild	1.43123	10.4244	93	33.995	any	0	0	0	1	0	1
YER-I33W	GLC7	R-II	class_III	IG_1649_genes-complement	divergent	chr05	431382	431383	6d_IP_vs_untagged_cer_reps_peak_556	-1049	mild	1.43123	10.4244	93	33.995	any	1	0	0	1	0	1
YER-I33W-A		R-III	class_IV	IG_1650_genes-complement	tandem	chr05	434631	434632	6d_IP_vs_untagged_cer_reps_peak_558	-2560	mild	1.8127	31.2511	299	28.9456	any	0	0	0	0	1	0
YER-I33W-A		R-III	class_IV	IG_1650_genes-complement	tandem	chr05	435754	435755	6d_IP_vs_untagged_cer_reps_peak_559	-1437	mild	1.66011	21.7856	205	28.9456	any	0	0	0	0	1	0
YER-I34C		R-III	class_IV	IG_1651_genes-complement	tandem						no summit upstream				31.5875	none	0	0	0	0	1	0
YER-I35C		R-III	class_IV	IG_1652_genes-complement	divergent	chr05	439256	439257	6d_IP_vs_untagged_cer_reps_peak_560	-912	mild	1.87151	35.273	338	42.2346	any	0	0	0	0	1	0
YER-I36W	GDI1	R-II	class_III	IG_1652_genes-complement	divergent	chr05	439256	439257	6d_IP_vs_untagged_cer_reps_peak_560	-259	mild	1.87151	35.273	338	42.2346	any	1	0	0	1	0	1
YER-I38W-A		R-III	class_IV	IG_1654_genes-complement	tandem	chr05	442154	442155	6d_IP_vs_untagged_cer_reps_peak_561	-7243	strong	2.84903	128.673	1268	24.4979	any	0	0	0	1	0	1
YER-I39C	RTR-I	R-III	class_IV	IG_1656_genes-complement	divergent						no summit upstream				31.6616	none	0	0	0	1	0	1
YER-I40W	EMP65	R-III	class_IV	IG_1656_genes-complement	divergent						no summit upstream				31.6616	none	0	0	0	1	0	1
YER-I41W	COX15	R-II	class_III	IG_1657_genes-complement	tandem	chr05	453424	453425	6d_IP_vs_untagged_cer_reps_peak_562	10	mild	1.41216	9.63864	85	40.0822	any	1	0	0	1	0	1
YER-I42C	MAG1	R-III	class_III	IG_1659_genes-complement	divergent						no summit upstream				28.0612	none	1	0	0	0	0	1
YER-I43W	DDI1	R-III	class_III	IG_1659_genes-complement	divergent						no summit upstream				28.0612	none	1	0	0	1	0	1
YER-I44C	UBP5	R-II	class_III	IG_1661_genes-complement	tandem						no summit upstream				32.6532	none	1	0	0	1	0	1
YER-I45C	FTR-I	R-III	class_IV	IG_1662_genes-complement	tandem						no summit upstream				29.265	none	1	0	0	1	0	1
YER-I47C	SCC4	R-III	class_IV	IG_1664_genes-complement	tandem	chr05	465132	465133	6d_IP_vs_untagged_cer_reps_peak_564	-244	mild	1.86357	34.7249	333	43.5483	any	0	0	0	0	1	0
YER-I48W-A		R-III	class_IV	IG_1665_genes-complement	tandem						no summit upstream				27.8427	none	1	0	0	1	0	1
YER-I49C	PEA2	R-III	class_IV	IG_1666_genes-complement	divergent	chr05	468066	468067	6d_IP_vs_untagged_cer_reps_peak_565	-533	strong	2.55021	95.3247	936	46.8878	any	0	0	0	1	0	1
YER-I50W	SPI1	R-II	class_III	IG_1666_genes-complement	divergent	chr05	468066	468067	6d_IP_vs_untagged_cer_reps_peak_565	-267	strong	2.55021	95.3247	936	46.8878	any	1	0	0	0	0	1
YER-I51C	UBP3	R-II	class_III	IG_1668_genes-complement	tandem						no summit upstream				23.5433	none	0	0	0	1	0	1
YER-I53C	PET122	R-III	class_IV	IG_1669_genes-complement	divergent						no summit upstream				29.3062	none	0	0	0	0	1	0
YER-I54W	OXA1	R-III	class_IV	IG_1669_genes-complement	divergent						no summit upstream				29.3062	none	1	0	0	1	0	1
YER-I55C	BEM2	R-II	class_III	IG_1671_genes-complement	tandem						no summit upstream				34.8018	none	0	0	0	1	0	1
YER-I56C		R-II	class_IV	IG_1672_genes-complement	divergent						no summit upstream				27.5444	none	0	0	0	1	0	1
YER-I57W	COG3	R-III	class_IV	IG_1672_genes-complement	divergent						no summit upstream				27.5444	none	0	0	0	1	0	1
YER-I58C		R-II	class_IV	IG_1674_genes-complement	divergent	chr05	491228	491229	6d_IP_vs_untagged_cer_reps_peak_567	-583	strong	2.9889	145.494	1435	61.1195	any	1	0	0	0	0	1
YER-I58W-A		R-II	class_I	IG_1674_genes-complement	divergent	chr05	491228	491229	6d_IP_vs_untagged_cer_reps_peak_567	-225	strong	2.9889	145.494	1435	61.1195	any	1	0	1	1	0	1
YER-I59C	BUR6	R-II	class_I	IG_1675_genes-complement	tandem	chr05	498956	498957	6d_IP_vs_untagged_cer_reps_peak_568	-6894	mild	1.76979	28.4337	271	25.7752	any	1	0	1	1	0	1
YER-I61C	SPT2	R-II	class_III	IG_1676_genes-complement	tandem						no summit upstream				36.9829	none	1	0	0	1	0	1
YER-I62C	RAD4	R-II	class_III	IG_1677_genes-complement	tandem	chr05	502913	502914	6d_IP_vs_untagged_cer_reps_peak_569	16	mild	1.72051	25.252	239	48.5254	any	0	0	0	0	1	0
YER-I63C	GCG1	R-III	class_IV	IG_1678_genes-complement	divergent	chr05	504074	504075	6d_IP_vs_untagged_cer_reps_peak_570	-274	mild	1.89218	36.6588	352	37.67	any	0	0	0	0	1	0
YER-I63C	GCG1	R-III	class_IV	IG_1678_genes-complement	divergent	chr05	505003	505004	6d_IP_vs_untagged_cer_reps_peak_571	-1203	mild	1.60448	18.5457	173	37.67	any	0	0	0	0	1	0
YER-I64W	CHD1	R-II	class_III	IG_1678_genes-complement	divergent	chr05	505003	505004	6d_IP_vs_untagged_cer_reps_peak_571	-312	mild	1.60448	18.5457	173	37.67	any	1	0	0	1	0	1
YER-I64W	CHD1	R-II	class_III	IG_1678_genes-complement	divergent	chr05	504074	504075	6d_IP_vs_untagged_cer_reps_peak_570	-1241	mild	1.89218	36.6588	352	37.67	any	1	0	0	1	0	1
YER-I65W	PAB1	R-I	class_III	IG_1679_genes-complement	tandem	chr05	510125	510126	6d_IP_vs_untagged_cer_reps_peak_572	-107	mild	1.49799	13.3098	121	36.718	any	1	0	0	1	0	1
YER-I67W	BCK2	R-II	class_III	IG_1681_genes-complement	tandem	chr05	517685	517686	6d_IP_vs_untagged_cer_reps_peak_574	-457	mild	2.0241	46.6602	452	42.6468	any	1	0	0	1	0	1
YER-I68C	CCA1	R-III	class_IV	IG_1683_genes-complement	divergent	chr05	522914	522915	6d_IP_vs_untagged_cer_reps_peak_575	-213	strong	4.06497	296.634	2942	73.92	any	0	0	0	1	0	1
YER-I69W	RPH1	R-II	class_III	IG_1683_genes-complement	divergent	chr05	522914	522915	6d_IP_vs_untagged_cer_reps_peak_575	-396	strong	4.06497	296.634	2942	73.92	any	1	0	0	1	0	1
YER-I70W	ADK2	R-III	class_IV	IG_1684_genes-complement	tandem						no summit upstream				38.8609	none	1	0	0	1	0	1
YER-I71W	RAD3	R-III	class_IV	IG_1685_genes-complement	tandem						no summit upstream				24.3361	none	0	0	0	1	0	1
YER-I72C	BRR-II	R-III	class_III	IG_1687_genes-complement	tandem						no summit upstream				22.326	none	0	0	0	1	0	1
YER-I74C	GRX4	R-III	class_IV	IG_1689_genes-complement	tandem						no summit upstream				30.7147	none	1	0	0	1	0	1
YER-I75C	TMT1	R-III	class_IV	IG_1690_genes-complement	divergent						no summit upstream				18.716	none	0	0	0	1	0	1
YER-I75W-A		R-III	class_IV	IG_1690_genes-complement	divergent						no summit upstream				18.716	none	0	0	0	1	0	1
YER-I76W	ECM32	R-III	class_III	IG_1691_genes-complement	tandem						no summit upstream				25.1318	none	1	0	0	1	0	1
YER-I77W	BMH1	R-II	class_III	IG_1692_genes-complement	tandem	chr05	545393	545394	6d_IP_vs_untagged_cer_reps_peak_576	-159	mild	2.16079	57.9598	564	47.778	any	1	0	0	1	0	1
YER-I78W	PDA1	R-III	class_III	IG_1693_genes-complement	tandem	chr05	546722	546723	6d_IP_vs_untagged_cer_reps_peak_577	-67	mild	1.49958	13.3098	121	42.8513	any	1	0	0	1	0	1
YER-I79W	DMC1	R-III	class_IV	IG_1694_genes-complement	tandem						no summit upstream				22.0003	none	1	0	0	1	0	1
YER-I80C	ISC10	R-III	class_III	IG_1696_genes-complement	tandem						no summit upstream				23.829	none	1	0	0	1	0	1
YER-I80C-A	SLO1	R-II	class_III	IG_1697_genes-complement	tandem	chr05	551426	551427	6d_IP_vs_untagged_cer_reps_peak_578	-271	mild	1.63627	20.4621	192	44.4327	any	0	0	0	1	0	1
YER-I81C		R-III	class_IV	IG_1698_genes-complement	divergent						no summit upstream				26.6347	none	1	0	0	0	0	1
YER-I82W	FMP10	R-III	class_III	IG_1698_genes-complement	divergent						no summit upstream				26.6347	none	1	0	0	0	0	1
YER-I83C	FAU1	R-III	class_IV	IG_1700_genes-complement	tandem						no summit upstream				17.7606	none	1	0	0	0	0	1
YER-I84C	TOG1	R-III	class_IV	IG_1701_genes-complement	divergent	chr05	559192	559193	6d_IP_vs_untagged_cer_reps_peak_579	-443	mild	1.914	44.4421	429	42.4127	any	0	0	0	0	1	0
YER-I85W	PUG1	R-III	class_IV	IG_1701_genes-complement	divergent	chr05	559192	559193	6d_IP_vs_untagged_cer_reps_peak_579	-152	mild	1.914	44.4421	429	42.4127	any	0	0	0	0	1	0
YER-I86C		R-III	class_IV	IG_1703_genes-complement	divergent						no summit upstream				22.3173	none	1	0	0	0	0	1
YER-I87W		R-III	class_IV	IG_1703_genes-complement	divergent						no summit upstream				22.3173	none	0	0	0	0	1	0
YER-I88C-A		R-III	class_IV	IG_1706_genes-complement	divergent	chr05	570528	570529	6d_IP_vs_untagged_cer_reps_peak_580	-621	strong	3.27432	230.699	2285	73.2731	any	0	0	0	1	0	1
YER-I88W		R-III	class_IV	IG_1704_genes-complement	tandem						no summit upstream				21.8642	none	0	0	0	0	1	0
YER-I89W		R-III	class_IV	IG_1706_genes-complement	divergent	chr05	570528	570529	6d_IP_vs_untagged_cer_reps_peak_580	-571	strong	3.27432	230.699	2285	73.2731	any	1	0	0	1	0	1
YFL001W	DEG1	R-III	class_IV	IG_1772_genes-complement	divergent						no summit upstream				35.0768	none	0	0	0	1	0	1
YFL002C	SPB4	R-III	class_IV	IG_1772_genes-complement	divergent						no summit upstream				35.0768	none	0	0	0	1	0	1
YFL003C	MSH4	R-III	class_IV	IG_1771_genes-complement	tandem	chr06	137509	137510	6d_IP_vs_untagged_cer_reps_peak_601	-278	mild	1.38832	8.73426	76	22.0242	any	0	0	0	0	1	0
YFL004W	VTC2	R-II	class_III	IG_1769_genes-complement	tandem	chr06	131547	131548	6d_IP_vs_untagged_cer_reps_peak_600	-224	mild	1.38673	8.73426	76	34.7085	any	1	0	0	1	0	1
YFL005W	SEC4	R-II	class_III	IG_1768_genes-complement	tandem	chr06	130025	130026	6d_IP_vs_untagged_cer_reps_peak_599	-183	mild	2.07337	50.7418	492	47.9237	any	1	0	0	1	0	1
YFL007W	BLM10	R-II	class_III	IG_1767_genes-complement	tandem						no summit upstream				34.6551	none	1	0	0	1	0	1
YFL008W	SMC1	R-III	class_IV	IG_1766_genes-complement	tandem						no summit upstream				29.5518	none	0	0	0	1	0	1
YFL009W	CDC4	R-II	class_III	IG_1765_genes-complement	divergent	chr06	115774	115775	6d_IP_vs_untagged_cer_reps_peak_598	-314	mild	1.38832	8.73426	76	37.1164	any	0	0	0	1	0	1
YFL010C	WWM1	R-II	class_III	IG_1765_genes-complement	divergent	chr06	115774	115775	6d_IP_vs_untagged_cer_reps_peak_598	-4	mild	1.38832	8.73426	76	37.1164	any	1	0	0	1	0	1
YFL010W-A	AUA1	R-II	class_III	IG_1764_genes-complement	tandem	chr06	114673	114674	6d_IP_vs_untagged_cer_reps_peak_597	-317	mild	1.52819	14.7792	136	36.2858	any	1	0	0	0	0	1
YFL011W	HXT10	R-III	class_IV	IG_1763_genes-complement	tandem						no summit upstream				21.2884	none	0	0	0	0	1	0
YFL012W		R-III	class_IV	IG_1762_genes-complement	tandem						no summit upstream				24.8791	none	0	0	0	0	1	0
YFL013W-A		R-III	class_III	IG_1761_genes-complement	tandem						no summit upstream				65.2293	none	1	0	0	1	0	1
YFL014W	HSP12	RØ	class_I	IG_1760_genes-complement	divergent						no summit upstream				60.0856	none	1	1	1	0	0	1
YFL015C		R-III	class_II	IG_1760_genes-complement	divergent						no summit upstream				60.0856	none	0	0	1	0	1	0
YFL015W-A		R-III	class_II	IG_1759_genes-complement	divergent						no summit upstream				48.0023	none	0	0	1	0	1	0
YFL016C	MDJ1	R-II	class_III	IG_1759_genes-complement	divergent						no summit upstream				48.0023	none	1	0	0	0	0	1
YFL017C	GNA1	R-III	class_IV	IG_1758_genes-complement	tandem						no summit upstream				34.3937	none	1	0	0	1	0	1
YFL017W-A	SMX2	R-III	class_IV	IG_1756_genes-complement	divergent						no summit upstream				35.644	none	1	0	0	1	0	1
YFL018C	LPD1	R-III	class_III	IG_1756_genes-complement	divergent						no summit upstream				35.644	none	1	0	0	1	0	1
YFL019C		R-III	class_IV	IG_1755_genes-complement	tandem						no summit upstream				26.6456	none	0	0	0	0	1	0
YFL020C	PAU5	R-III	class_IV	IG_1754_genes-complement	tandem						no summit upstream				18.5678	none	0	0	0	0	1	0
YFL022C	FRS2	R-II	class_IV	IG_1752_genes-complement	tandem	chr06	95698	95699	6d_IP_vs_untagged_cer_reps_peak_594	-629	strong	4.44644	358.434	3559	83.0527	any	0	0	0	1	0	1
YFL023W	BUD27	R-II	class_IV	IG_1750_genes-complement	divergent	chr06	90770	90771	6d_IP_vs_untagged_cer_reps_peak_593	-202	strong	4.30021	334.019	3315	93.7753	any	0	0	0	1	0	1
YFL024C	EPL1	R-II	class_III	IG_1750_genes-complement	divergent	chr06	90770	90771	6d_IP_vs_untagged_cer_reps_peak_593	-350	strong	4.30021	334.019	3315	93.7753	any	1	0	0	1	0	1
YFL025C	BST1	R-II	class_IV	IG_1749_genes-complement	tandem						no summit upstream				28.2405	none	0	0	0	1	0	1
YFL026W	STE2	R-II	class_IV	IG_1747_genes-complement	divergent						no summit upstream				24.7605	none	0	0	0	1	0	1
YFL027C	GYP8	R-III	class_IV	IG_1747_genes-complement	divergent						no summit upstream				24.7605	none	0	0	0	1	0	1
YFL028C	CAF16	R-III	class_IV	IG_1746_genes-complement	tandem						no summit upstream				19.5275	none	0	0	0	1	0	1
YFL029C	CAK1	R-III	class_IV	IG_1745_genes-complement	tandem						no summit upstream				16.3422	none	1	0	0	0	0	1
YFL030W	AGX1	R-III	class_IV	IG_1743_genes-complement	tandem	chr06	76600	76601	6d_IP_vs_untagged_cer_reps_peak_591	-173	mild	1.60289	18.5457	173	36.9269	any	1	0	0	0	0	1
YFL032W		R-II	class_I	IG_1742_genes-complement	divergent	chr06	74830	74831	6d_IP_vs_untagged_cer_reps_peak_590	17	strong	3.15739	166.543	1645	59.3093	any	1	0	1	1	0	1
YFL033C	RIM15	R-II	class_III	IG_1742_genes-complement	divergent	chr06	74830	74831	6d_IP_vs_untagged_cer_reps_peak_590	-318	strong	3.15739	166.543	1645	59.3093	any	1	0	0	1	0	1
YFL034C-A	RPL22B	R-I	class_IV	IG_1740_genes-complement	divergent	chr06	65068	65069	6d_IP_vs_untagged_cer_reps_peak_589	-90	mild	2.06066	49.7876	483	44.1186	any	1	0	0	1	0	1
YFL034C-B	MOB2	R-II	class_IV	IG_1739_genes-complement	tandem						no summit upstream				34.4225	none	0	0	0	1	0	1
YFL034W	MIL1	R-III	class_IV	IG_1740_genes-complement	divergent	chr06	65068	65069	6d_IP_vs_untagged_cer_reps_peak_589	-385	mild	2.06066	49.7876	483	44.1186	any	0	0	0	0	1	0
YFL036W	RPO41	R-II	class_III	IG_1737_genes-complement	tandem	chr06	58460	58461	6d_IP_vs_untagged_cer_reps_peak_588	-208	mild	1.80793	30.9903	296	33.0474	any	1	0	0	1	0	1
YFL037W	TUB2	R-III	class_IV	IG_1736_genes-complement	divergent						no summit upstream				51.9291	none	0	0	0	1	0	1
YFL038C	YPT1	R-II	class_I	IG_1736_genes-complement	divergent						no summit upstream				51.9291	none	1	0	1	1	0	1
YFL039C	ACT1	R-II	class_III	IG_1735_genes-complement	tandem	chr06	55203	55204	6d_IP_vs_untagged_cer_reps_peak_587	-387	strong	4.08086	299.081	2966	77.4684	any	1	0	0	1	0	1
YFL040W		R-III	class_IV	IG_1733_genes-complement	tandem						no summit upstream				23.591	none	1	0	0	1	0	1
YFL041W	FET5	R-III	class_III	IG_1732_genes-complement	tandem						no summit upstream				35.1609	none	0	0	0	0	1	0
YFL041W-A		R-III	class_IV	IG_1731_genes-complement	divergent						no summit upstream				22.8908	none	1	0	0	0	0	1
YFL042C		R-III	class_III	IG_1731_genes-complement	divergent						no summit upstream				22.8908	none	1	0	0	0	0	1
YFL044C	OTU1	R-III	class_III	IG_1730_genes-complement	tandem						no summit upstream				25.2458	none	1	0	0	1	0	1
YFL045C	SEC53	R-II	class_III	IG_1729_genes-complement	tandem						no summit upstream				33.2758	none	1	0	0	1	0	1
YFL046W	FMP32	R-III	class_IV	IG_1727_genes-complement	tandem						no summit upstream				23.5789	none	1	0	0	1	0	1
YFL047W	RGD2	R-III	class_IV	IG_1726_genes-complement	divergent						no summit upstream				27.0138	none	0	0	0	0	1	0
YFL048C	EMP47	R-III	class_III	IG_1726_genes-complement	divergent						no summit upstream				27.0138	none	1	0	0	1	0	1
YFL049W	SWP82	R-II	class_III	IG_1724_genes-complement	divergent						no summit upstream				22.4416	none	0	0	0	1	0	1
YFL050C	ALR-II	R-III	class_IV	IG_1724_genes-complement	divergent						no summit upstream				22.4416	none	0	0	0	0	1	0
YFL051C		R-III	class_III	IG_1723_genes-complement	tandem	chr06	31297	31298	6d_IP_vs_untagged_cer_reps_peak_585	-649	mild	2.09404	52.3483	508	32.0342	any	0	0	0	0	1	0
YFL052W		R-III	class_III	IG_1721_genes-complement	tandem						no summit upstream				19.8101	none	0	0	0	0	1	0
YFL053W	DAK2	R-III	class_IV	IG_1720_genes-complement	divergent	chr06	22960	22961	6d_IP_vs_untagged_cer_reps_peak_584	-431	mild	1.74753	26.9451	256	36.3587	any	0	0	0	0	1	0
YFL054C	AQY3	R-III	class_III	IG_1720_genes-complement	divergent	chr06	22960	22961	6d_IP_vs_untagged_cer_reps_peak_584	-91	mild	1.74753	26.9451	256	36.3587	any	0	0	0	0	1	0
YFL055W	AGP3	R-III	class_IV	IG_1718_genes-complement	tandem						no summit upstream				20.116	none	0	0	0	0	1	0
YFL058W	THI5	R-III	class_IV	IG_1717_genes-complement	tandem						no summit upstream				22.3679	none	0	0	0	0	1	0
YFL059W	SNZ3	R-III	class_IV	IG_1716_genes-complement	divergent						no summit upstream				22.8338	none	1	0	0	0	0	1
YFL060C	SNO3	R-III	class_IV	IG_1716_genes-complement	divergent						no summit upstream				22.8338	none	0	0	0	0	1	0
YFL061W	DDI2	R-III	class_IV	IG_1714_genes-complement	tandem						no summit upstream				20.7021	none	1	0	0	0	0	1
YFL062W	COS4	R-III	class_IV	IG_1713_genes-complement	tandem						no summit upstream				33.7076	none	0	0	0	0	1	0
YFL063W		R-III	class_IV	IG_1712_genes-complement	divergent	chr06	4740	4741	6d_IP_vs_untagged_cer_reps_peak_582	-179	mild	2.23097	191.685	1896	107.944	any	0	0	0	0	1	0
YFL064C		R-III	class_IV	IG_1712_genes-complement	divergent	chr06	4740	4741	6d_IP_vs_untagged_cer_reps_peak_582	-894	mild	2.23097	191.685	1896	107.944	any	1	0	0	1	0	1
YFL066C		R-III	class_III	IG_1711_genes-complement	tandem						no summit upstream				41.5018	none	1	0	0	1	0	1
YFL067W		R-III	class_III	IG_1709_genes-complement	tandem						no summit upstream				34.5532	none	1	0	0	1	0	1
YFR001W	LOC1	R-II	class_IV	IG_1773_genes-complement	tandem	chr06	148707	148708	6d_IP_vs_untagged_cer_reps_peak_602	-366	mild	1.57269	16.9131	157	43.4686	any	1	0	0	1	0	1
YFR002W	NIC96	R-II	class_IV	IG_1774_genes-complement	tandem	chr06	149822	149823	6d_IP_vs_untagged_cer_reps_peak_603	-177	mild	1.38355	8.58765	75	41.7645	any	1	0	0	1	0	1
YFR003C	YPI1	R-III	class_IV	IG_1776_genes-complement	divergent						no summit upstream				39.1564	none	1	0	0	1	0	1
YFR004W	RPN11	R-II	class_III	IG_1776_genes-complement	divergent						no summit upstream				39.1564	none	1	0	0	1	0	1
YFR005C	SAD1	R-III	class_IV	IG_1778_genes-complement	divergent						no summit upstream				32.4304	none	0	0	0	1	0	1
YFR006W		R-III	class_III	IG_1778_genes-complement	divergent						no summit upstream				32.4304	none	0	0	0	1	0	1
YFR007W	YFH7	R-III	class_IV	IG_1779_genes-complement	tandem	chr06	157950	157951	6d_IP_vs_untagged_cer_reps_peak_604	-1306	mild	1.7984	30.2135	288	26.9866	any	1	0	0	0	0	1
YFR008W	FAR7	R-III	class_IV	IG_1780_genes-complement	tandem						no summit upstream				24.1826	none	0	0	0	0	1	0
YFR009W	GCN20	R-II	class_IV	IG_1781_genes-complement	tandem						no summit upstream				23.5846	none	0	0	0	1	0	1
YFR010W	UBP6	R-III	class_IV	IG_1782_genes-complement	tandem						no summit upstream				30.1567	none	1	0	0	1	0	1
YFR010W-A		R-III	class_IV	IG_1783_genes-complement	tandem						no summit upstream				18.0699	none	1	0	0	1	0	1
YFR011C		R-III	class_IV	IG_1784_genes-complement	divergent						no summit upstream				29.5091	none	1	0	0	1	0	1
YFR012W	DCV1	R-III	class_IV	IG_1784_genes-complement	divergent						no summit upstream				29.5091	none	0	0	0	0	1	0
YFR012W-A		R-III	class_IV	IG_1785_genes-complement	tandem						no summit upstream				18.6851	none	0	0	0	0	1	0
YFR013W	IOC3	R-III	class_IV	IG_1786_genes-complement	tandem						no summit upstream				22.3029	none	0	0	0	1	0	1
YFR014C	CMK1	R-III	class_IV	IG_1788_genes-complement	tandem						no summit upstream				29.4174	none	1	0	0	1	0	1
YFR015C	GSY1	R-III	class_III	IG_1789_genes-complement	tandem	chr06	176748	176749	6d_IP_vs_untagged_cer_reps_peak_605	-277	mild	1.57905	17.3149	161	36.8405	any	1	0	0	0	0	1
YFR016C		R-III	class_III	IG_1790_genes-complement	tandem	chr06	182132	182133	6d_IP_vs_untagged_cer_reps_peak_607	-1305	mild	1.70621	24.541	232	32.5095	any	0	0	0	0	1	0
YFR016C		R-III	class_III	IG_1790_genes-complement	tandem	chr06	181088	181089	6d_IP_vs_untagged_cer_reps_peak_606	-261	mild	1.62674	19.814	185	32.5095	any	0	0	0	0	1	0
YFR017C	IGD1	R-II	class_III	IG_1791_genes-complement	tandem						no summit upstream				53.3687	none	1	0	0	0	0	1
YFR018C		R-III	class_IV	IG_1792_genes-complement	divergent						no summit upstream				35.8998	none	0	0	0	0	1	0
YFR019W	FAB1	R-III	class_IV	IG_1792_genes-complement	divergent						no summit upstream				35.8998	none	0	0	0	0	1	0
YFR020W	CSS2	R-III	class_IV	IG_1793_genes-complement	tandem	chr06	191577	191578	6d_IP_vs_untagged_cer_reps_peak_609	-1045	mild	2.23789	72.5518	709	30.5925	any	0	0	0	0	1	0
YFR021W	ATG18	R-III	class_IV	IG_1794_genes-complement	tandem						no summit upstream				20.1892	none	1	0	0	1	0	1
YFR022W	ROG3	R-II	class_IV	IG_1795_genes-complement	tandem						no summit upstream				24.1344	none	0	0	0	0	1	0
YFR023W	PES4	R-III	class_IV	IG_1796_genes-complement	tandem						no summit upstream				24.9955	none	0	0	0	0	1	0
YFR024C-A	LSB3	R-III	class_IV	IG_1798_genes-complement	tandem						no summit upstream				24.9882	none	1	0	0	0	0	1
YFR025C	HIS2	R-III	class_IV	IG_1799_genes-complement	tandem						no summit upstream				27.3578	none	0	0	0	0	1	0
YFR026C	ULI1	R-III	class_IV	IG_1800_genes-complement	divergent						no summit upstream				21.2149	none	0	0	0	0	1	0
YFR027W	ECO1	R-III	class_IV	IG_1800_genes-complement	divergent						no summit upstream				21.2149	none	0	0	0	0	1	0
YFR028C	CDC14	R-III	class_IV	IG_1802_genes-complement	divergent	chr06	210782	210783	6d_IP_vs_untagged_cer_reps_peak_610	-661	mild	1.43759	10.7468	96	33.4179	any	0	0	0	1	0	1
YFR029W	PTR-III	R-II	class_III	IG_1802_genes-complement	divergent	chr06	210782	210783	6d_IP_vs_untagged_cer_reps_peak_610	-89	mild	1.43759	10.7468	96	33.4179	any	0	0	0	0	1	0
YFR030W	MET10	R-III	class_IV	IG_1803_genes-complement	tandem						no summit upstream				36.0008	none	0	0	0	1	0	1
YFR031C	SMC2	R-III	class_IV	IG_1805_genes-complement	tandem						no summit upstream				17.519	none	0	0	0	1	0	1
YFR031C-A	RPL2A	R-II	class_IV	IG_1806_genes-complement	tandem	chr06	221828	221829	6d_IP_vs_untagged_cer_reps_peak_611	-361	mild	1.95893	41.5354	401	36.7383	any	1	0	0	1	0	1
YFR032C	RRT5	R-III	class_IV	IG_1807_genes-complement	tandem						no summit upstream				30.3485	none	0	0	0	1	0	1
YFR032C-A	RPL29	R-I	class_IV	IG_1808_genes-complement	tandem						no summit upstream				38.0792	none	1	0	0	1	0	1
YFR032C-B		R-II	class_II	IG_1809_genes-complement	tandem						no summit upstream				69.6083	none	1	0	1	1	0	1
YFR033C	QCR6	R-I	class_I	IG_1810_genes-complement	tandem						no summit upstream				71.3286	none	1	0	1	1	0	1
YFR034C	PHO4	R-II	class_I	IG_1811_genes-complement	divergent						no summit upstream				60.1725	none	1	0	1	1	0	1
YFR034W-A		R-III	class_II	IG_1811_genes-complement	divergent						no summit upstream				60.1725	none	0	0	1	1	0	1
YFR035C		R-II	class_II	IG_1812_genes-complement	divergent						no summit upstream				61.4937	none	0	0	1	0	1	0
YFR036W	CDC26	R-II	class_IV	IG_1812_genes-complement	divergent						no summit upstream				61.4937	none	1	0	0	1	0	1
YFR036W-A		R-III	class_IV	IG_1813_genes-complement	tandem						no summit upstream				26.9161	none	1	0	0	1	0	1
YFR037C	RSC8	R-II	class_IV	IG_1814_genes-complement	divergent						no summit upstream				30.2469	none	1	0	0	1	0	1
YFR038W	IRC5	R-III	class_IV	IG_1814_genes-complement	divergent						no summit upstream				30.2469	none	0	0	0	1	0	1
YFR039C	OSW7	R-III	class_IV	IG_1816_genes-complement	divergent	chr06	233765	233766	6d_IP_vs_untagged_cer_reps_peak_614	-136	strong	2.5518	95.7335	940	54.5093	any	0	0	0	1	0	1
YFR040W	SAP155	R-II	class_III	IG_1816_genes-complement	divergent	chr06	233765	233766	6d_IP_vs_untagged_cer_reps_peak_614	-412	strong	2.5518	95.7335	940	54.5093	any	1	0	0	1	0	1
YFR041C	ERJ5	R-III	class_IV	IG_1818_genes-complement	divergent						no summit upstream				23.6558	none	1	0	0	1	0	1
YFR042W	KEG1	R-III	class_IV	IG_1818_genes-complement	divergent						no summit upstream				23.6558	none	0	0	0	0	1	0
YFR043C	IRC6	R-III	class_IV	IG_1820_genes-complement	tandem						no summit upstream				15.6727	none	1	0	0	1	0	1
YFR044C	DUG1	R-III	class_IV	IG_1821_genes-complement	divergent						no summit upstream				21.5832	none	1	0	0	1	0	1
YFR045W		R-III	class_IV	IG_1821_genes-complement	divergent						no summit upstream				21.5832	none	0	0	0	0	1	0
YFR046C	CNN1	R-III	class_IV	IG_1823_genes-complement	tandem						no summit upstream				14.5084	none	0	0	0	0	1	0
YFR047C	BNA6	R-III	class_IV	IG_1824_genes-complement	divergent						no summit upstream				21.7732	none	1	0	0	0	0	1
YFR048W	RMD8	R-III	class_IV	IG_1824_genes-complement	divergent						no summit upstream				21.7732	none	1	0	0	1	0	1
YFR049W	YMR-III1	R-III	class_IV	IG_1825_genes-complement	tandem						no summit upstream				28.7772	none	1	0	0	1	0	1
YFR050C	PRE4	R-II	class_III	IG_1827_genes-complement	tandem						no summit upstream				27.5821	none	1	0	0	1	0	1
YFR051C	RET2	R-III	class_IV	IG_1828_genes-complement	divergent						no summit upstream				33.5526	none	1	0	0	1	0	1
YFR052W	RPN12	R-II	class_III	IG_1828_genes-complement	divergent						no summit upstream				33.5526	none	1	0	0	1	0	1
YFR053C	HXK1	R-III	class_IV	IG_1830_genes-complement	tandem	chr06	255497	255498	6d_IP_vs_untagged_cer_reps_peak_615	-343	strong	3.78363	253.757	2515	35.5145	any	1	0	0	0	0	1
YFR054C		R-III	class_IV	IG_1831_genes-complement	tandem						no summit upstream				19.8213	none	0	0	0	0	1	0
YFR057W		R-III	class_IV	IG_1832_genes-complement	tandem						no summit upstream				15.3479	none	0	0	0	0	1	0
YGL001C	ERG26	R-III	class_IV	IG_2081_genes-complement	tandem	chr07	496775	496776	6d_IP_vs_untagged_cer_reps_peak_694	-216	mild	1.5107	13.8526	126	36.8666	any	0	0	0	1	0	1
YGL002W	ERP6	R-III	class_III	IG_2079_genes-complement	divergent						no summit upstream				38.9002	none	1	0	0	1	0	1
YGL003C	CDH1	R-II	class_III	IG_2079_genes-complement	divergent						no summit upstream				38.9002	none	1	0	0	1	0	1
YGL004C	RPN14	R-III	class_IV	IG_2078_genes-complement	tandem						no summit upstream				26.5497	none	1	0	0	0	0	1
YGL005C	COG7	R-II	class_IV	IG_2077_genes-complement	tandem						no summit upstream				27.4595	none	1	0	0	0	0	1
YGL006W	PMC1	R-II	class_III	IG_2075_genes-complement	tandem						no summit upstream				40.8035	none	1	0	0	0	0	1
YGL006W-A		R-III	class_II	IG_2074_genes-complement	tandem	chr07	485392	485393	6d_IP_vs_untagged_cer_reps_peak_693	-31	mild	2.27206	68.049	664	58.2151	any	1	0	1	0	0	1
YGL007C-A		R-III	class_IV	IG_2073_genes-complement	divergent						no summit upstream				33.0266	none	1	0	0	1	0	1
YGL007W	BRP1	R-III	class_II	IG_2073_genes-complement	divergent						no summit upstream				33.0266	none	1	0	1	0	0	1
YGL008C	PMA1	R-I	class_III	IG_2072_genes-complement	tandem						no summit upstream				19.5654	none	1	0	0	1	0	1
YGL009C	LEU1	R-III	class_III	IG_2071_genes-complement	tandem	chr07	478938	478939	6d_IP_vs_untagged_cer_reps_peak_691	-219	mild	1.90966	38.0668	366	30.9435	any	1	0	0	1	0	1
YGL010W	MPO1	R-III	class_III	IG_2069_genes-complement	divergent						no summit upstream				38.7726	none	1	0	0	1	0	1
YGL011C	SCL1	R-II	class_III	IG_2069_genes-complement	divergent						no summit upstream				38.7726	none	1	0	0	1	0	1
YGL012W	ERG4	R-III	class_IV	IG_2067_genes-complement	divergent	chr07	472588	472589	6d_IP_vs_untagged_cer_reps_peak_690	-225	strong	3.91715	273.726	2714	84.5553	any	0	0	0	1	0	1
YGL013C	PDR-I	R-II	class_III	IG_2067_genes-complement	divergent	chr07	472588	472589	6d_IP_vs_untagged_cer_reps_peak_690	-168	strong	3.91715	273.726	2714	84.5553	any	1	0	0	1	0	1
YGL014W	PUF4	R-II	class_III	IG_2065_genes-complement	divergent						no summit upstream				23.4281	none	1	0	0	1	0	1
YGL015C		R-III	class_IV	IG_2065_genes-complement	divergent						no summit upstream				23.4281	none	0	0	0	0	1	0
YGL016W	KAP122	R-III	class_IV	IG_2063_genes-complement	tandem						no summit upstream				26.3487	none	0	0	0	1	0	1
YGL017W	ATE1	R-III	class_IV	IG_2062_genes-complement	divergent						no summit upstream				24.8221	none	0	0	0	0	1	0
YGL018C	JAC1	R-III	class_IV	IG_2062_genes-complement	divergent						no summit upstream				24.8221	none	0	0	0	1	0	1
YGL019W	CKB1	R-III	class_IV	IG_2060_genes-complement	divergent						no summit upstream				24.0679	none	1	0	0	1	0	1
YGL020C	GET1	R-III	class_IV	IG_2060_genes-complement	divergent						no summit upstream				24.0679	none	0	0	0	1	0	1
YGL021W	ALK1	R-III	class_IV	IG_2058_genes-complement	tandem						no summit upstream				21.5732	none	0	0	0	1	0	1
YGL022W	STT3	R-III	class_IV	IG_2057_genes-complement	divergent						no summit upstream				36.381	none	0	0	0	1	0	1
YGL023C	PIB2	R-II	class_III	IG_2057_genes-complement	divergent						no summit upstream				36.381	none	1	0	0	0	0	1
YGL026C	TRP5	R-II	class_IV	IG_2055_genes-complement	tandem						no summit upstream				30.5676	none	1	0	0	1	0	1
YGL027C	CWH41	R-III	class_IV	IG_2054_genes-complement	tandem						no summit upstream				22.9718	none	0	0	0	1	0	1
YGL028C	SCW11	R-III	class_III	IG_2053_genes-complement	tandem						no summit upstream				27.1141	none	0	0	0	1	0	1
YGL029W	CGR-I	R-II	class_IV	IG_2051_genes-complement	tandem						no summit upstream				37.1492	none	1	0	0	1	0	1
YGL030W	RPL30	R-I	class_IV	IG_2050_genes-complement	divergent	chr07	438713	438714	6d_IP_vs_untagged_cer_reps_peak_688	-315	mild	1.95258	41.2415	398	36.2931	any	1	0	0	1	0	1
YGL031C	RPL24A	R-II	class_IV	IG_2050_genes-complement	divergent	chr07	438713	438714	6d_IP_vs_untagged_cer_reps_peak_688	-284	mild	1.95258	41.2415	398	36.2931	any	1	0	0	1	0	1
YGL032C	AGA2	R-III	class_IV	IG_2049_genes-complement	tandem						no summit upstream				34.706	none	1	0	0	1	0	1
YGL033W	HOP2	R-III	class_IV	IG_2047_genes-complement	divergent						no summit upstream				24.343	none	0	0	0	0	1	0
YGL034C		R-III	class_II	IG_2047_genes-complement	divergent						no summit upstream				24.343	none	0	0	1	0	1	0
YGL035C	MIG1	R-II	class_III	IG_2046_genes-complement	tandem						no summit upstream				55.3719	none	1	0	0	1	0	1
YGL036W		R-II	class_III	IG_2044_genes-complement	divergent	chr07	428222	428223	6d_IP_vs_untagged_cer_reps_peak_686	-319	strong	2.77274	119.658	1178	57.1782	any	1	0	0	1	0	1
YGL037C	PNC1	R-II	class_III	IG_2044_genes-complement	divergent	chr07	428222	428223	6d_IP_vs_untagged_cer_reps_peak_686	-210	strong	2.77274	119.658	1178	57.1782	any	1	0	0	1	0	1
YGL038C	OCH1	R-II	class_III	IG_2043_genes-complement	tandem						no summit upstream				54.778	none	1	0	0	1	0	1
YGL039W		R-III	class_IV	IG_2041_genes-complement	divergent	chr07	420887	420888	6d_IP_vs_untagged_cer_reps_peak_684	-2960	mild	1.93032	39.4968	380	33.356	any	0	0	0	1	0	1
YGL039W		R-III	class_IV	IG_2041_genes-complement	divergent	chr07	423144	423145	6d_IP_vs_untagged_cer_reps_peak_685	-703	mild	1.71257	24.777	234	33.356	any	0	0	0	1	0	1
YGL040C	HEM2	R-II	class_IV	IG_2041_genes-complement	divergent	chr07	420887	420888	6d_IP_vs_untagged_cer_reps_peak_684	-256	mild	1.93032	39.4968	380	33.356	any	1	0	0	1	0	1
YGL040C	HEM2	R-II	class_IV	IG_2041_genes-complement	divergent	chr07	423144	423145	6d_IP_vs_untagged_cer_reps_peak_685	-2513	mild	1.71257	24.777	234	33.356	any	1	0	0	1	0	1
YGL042C		R-III	class_III	IG_2039_genes-complement	tandem						no summit upstream				24.0795	none	1	0	0	1	0	1
YGL043W	DST1	R-II	class_III	IG_2038_genes-complement	divergent						no summit upstream				26.6658	none	1	0	0	1	0	1
YGL044C	RNA15	R-II	class_IV	IG_2038_genes-complement	divergent						no summit upstream				26.6658	none	1	0	0	0	0	1
YGL045W	RIM8	R-II	class_III	IG_2036_genes-complement	tandem	chr07	412444	412445	6d_IP_vs_untagged_cer_reps_peak_681	-1595	strong	2.67896	109.161	1073	53.7221	any	1	0	0	0	0	1
YGL045W	RIM8	R-II	class_III	IG_2036_genes-complement	tandem	chr07	413439	413440	6d_IP_vs_untagged_cer_reps_peak_682	-600	strong	2.66306	107.447	1056	53.7221	any	1	0	0	0	0	1
YGL047W	ALG13	R-III	class_IV	IG_2035_genes-complement	divergent						no summit upstream				38.3846	none	1	0	0	1	0	1
YGL048C	RPT6	R-II	class_III	IG_2035_genes-complement	divergent						no summit upstream				38.3846	none	1	0	0	1	0	1
YGL049C	TIF4632	R-III	class_III	IG_2034_genes-complement	tandem	chr07	409933	409934	6d_IP_vs_untagged_cer_reps_peak_680	-197	mild	1.84767	33.6397	322	37.4186	any	0	0	0	1	0	1
YGL050W	TYW3	R-III	class_IV	IG_2032_genes-complement	tandem	chr07	405514	405515	6d_IP_vs_untagged_cer_reps_peak_679	-223	mild	1.83178	32.5689	312	31.4589	any	1	0	0	1	0	1
YGL052W		R-III	class_IV	IG_2031_genes-complement	tandem						no summit upstream				13.9737	none	1	0	0	1	0	1
YGL053W	PRM8	R-III	class_IV	IG_2030_genes-complement	divergent	chr07	401469	401470	6d_IP_vs_untagged_cer_reps_peak_678	-1034	mild	1.91284	38.3511	369	28.9923	any	1	0	0	1	0	1
YGL054C	ERV14	R-I	class_III	IG_2030_genes-complement	divergent	chr07	401469	401470	6d_IP_vs_untagged_cer_reps_peak_678	-130	mild	1.91284	38.3511	369	28.9923	any	1	0	0	1	0	1
YGL055W	OLE1	R-II	class_III	IG_2028_genes-complement	divergent	chr07	398050	398051	6d_IP_vs_untagged_cer_reps_peak_677	-515	strong	4.95825	446.704	4440	80.9525	any	1	0	0	1	0	1
YGL056C	SDS23	R-I	class_III	IG_2028_genes-complement	divergent	chr07	398050	398051	6d_IP_vs_untagged_cer_reps_peak_677	-338	strong	4.95825	446.704	4440	80.9525	any	1	0	0	1	0	1
YGL057C	GEP7	R-III	class_IV	IG_2027_genes-complement	tandem						no summit upstream				36.9424	none	1	0	0	1	0	1
YGL058W	RAD6	R-I	class_III	IG_2025_genes-complement	tandem	chr07	393912	393913	6d_IP_vs_untagged_cer_reps_peak_676	-11	mild	1.72846	25.7309	244	46.9178	any	1	0	0	1	0	1
YGL059W	PKP2	R-III	class_IV	IG_2024_genes-complement	tandem						no summit upstream				34.208	none	1	0	0	0	0	1
YGL060W	YBP2	R-III	class_IV	IG_2023_genes-complement	divergent						no summit upstream				26.5322	none	0	0	0	0	1	0
YGL061C	DUO1	R-III	class_IV	IG_2023_genes-complement	divergent						no summit upstream				26.5322	none	1	0	0	0	0	1
YGL062W	PYC1	R-II	class_III	IG_2021_genes-complement	tandem	chr07	384861	384862	6d_IP_vs_untagged_cer_reps_peak_675	-287	strong	6.76229	803.027	7998	129.482	any	1	0	0	0	0	1
YGL063W	PUS2	R-III	class_II	IG_2020_genes-complement	divergent						no summit upstream				32.5055	none	0	0	1	1	0	1
YGL064C	MRH4	R-III	class_IV	IG_2020_genes-complement	divergent						no summit upstream				32.5055	none	0	0	0	1	0	1
YGL065C	ALG2	R-III	class_IV	IG_2019_genes-complement	tandem						no summit upstream				22.912	none	0	0	0	1	0	1
YGL066W	SGF73	R-II	class_III	IG_2017_genes-complement	tandem						no summit upstream				24.6281	none	0	0	0	1	0	1
YGL067W	NPY1	R-III	class_IV	IG_2016_genes-complement	tandem						no summit upstream				20.1178	none	0	0	0	1	0	1
YGL070C	RPB9	R-II	class_IV	IG_2015_genes-complement	tandem						no summit upstream				30.4487	none	0	0	0	1	0	1
YGL071W	AFT1	R-III	class_IV	IG_2013_genes-complement	divergent						no summit upstream				35.5476	none	0	0	0	1	0	1
YGL072C		R-III	class_I	IG_2013_genes-complement	divergent						no summit upstream				35.5476	none	1	0	1	1	0	1
YGL075C	MPS2	R-III	class_IV	IG_2012_genes-complement	tandem	chr07	368394	368395	6d_IP_vs_untagged_cer_reps_peak_672	-206	mild	1.34699	7.18734	61	35.7266	any	0	0	0	1	0	1
YGL076C	RPL7A	R-II	class_III	IG_2011_genes-complement	tandem	chr07	366142	366143	6d_IP_vs_untagged_cer_reps_peak_671	-92	mild	1.96529	42.1255	406	40.8727	any	1	0	0	1	0	1
YGL077C	HNM1	R-II	class_IV	IG_2010_genes-complement	tandem						no summit upstream				31.2334	none	1	0	0	1	0	1
YGL078C	DBP3	R-II	class_III	IG_2009_genes-complement	tandem						no summit upstream				28.3988	none	0	0	0	1	0	1
YGL079W	KXD1	R-III	class_IV	IG_2007_genes-complement	tandem						no summit upstream				32.3584	none	1	0	0	1	0	1
YGL080W	MPC1	R-II	class_III	IG_2006_genes-complement	tandem						no summit upstream				37.5131	none	1	0	0	1	0	1
YGL081W		R-III	class_IV	IG_2005_genes-complement	tandem						no summit upstream				23.512	none	0	0	0	0	1	0
YGL082W		R-III	class_IV	IG_2004_genes-complement	tandem						no summit upstream				30.4831	none	0	0	0	0	1	0
YGL083W	SCY1	R-III	class_IV	IG_2003_genes-complement	divergent						no summit upstream				30.2375	none	0	0	0	1	0	1
YGL084C	GUP1	R-III	class_IV	IG_2003_genes-complement	divergent						no summit upstream				30.2375	none	0	0	0	0	1	0
YGL085W	LCL3	R-III	class_IV	IG_2001_genes-complement	tandem						no summit upstream				19.844	none	0	0	0	1	0	1
YGL086W	MAD1	R-II	class_IV	IG_2000_genes-complement	divergent						no summit upstream				31.6961	none	0	0	0	1	0	1
YGL087C	MMS2	R-III	class_III	IG_2000_genes-complement	divergent						no summit upstream				31.6961	none	1	0	0	1	0	1
YGL088W		RØ	class_III	IG_1998_genes-complement	divergent						no summit upstream				24.9994	none	1	0	0	1	0	1
YGL089C	MF(ALPHA)2	R-III	class_IV	IG_1998_genes-complement	divergent						no summit upstream				24.9994	none	0	0	0	0	1	0
YGL090W	LIF1	R-III	class_III	IG_1996_genes-complement	divergent						no summit upstream				34.6053	none	0	0	0	0	1	0
YGL091C	NBP35	R-II	class_III	IG_1996_genes-complement	divergent						no summit upstream				34.6053	none	0	0	0	1	0	1
YGL092W	NUP145	R-III	class_IV	IG_1994_genes-complement	tandem						no summit upstream				31.795	none	0	0	0	1	0	1
YGL093W	SPC105	R-II	class_III	IG_1993_genes-complement	divergent						no summit upstream				31.9931	none	0	0	0	0	1	0
YGL094C	PAN2	R-II	class_III	IG_1993_genes-complement	divergent						no summit upstream				31.9931	none	0	0	0	1	0	1
YGL095C	VPS45	R-III	class_IV	IG_1992_genes-complement	tandem	chr07	330789	330790	6d_IP_vs_untagged_cer_reps_peak_669	-128	mild	1.55362	15.927	147	37.318	any	0	0	0	0	1	0
YGL096W	TOS8	R-I	class_III	IG_1990_genes-complement	tandem	chr07	324849	324850	6d_IP_vs_untagged_cer_reps_peak_665	-438	strong	3.86947	266.62	2643	44.8204	any	1	0	0	0	0	1
YGL097W	SRM1	R-II	class_IV	IG_1989_genes-complement	tandem	chr07	319660	319661	6d_IP_vs_untagged_cer_reps_peak_664	-2071	mild	1.39783	12.6661	115	26.8422	any	0	0	0	1	0	1
YGL098W	USE1	R-II	class_III	IG_1988_genes-complement	tandem						no summit upstream				34.1623	none	1	0	0	1	0	1
YGL099W	LSG1	R-III	class_IV	IG_1987_genes-complement	tandem						no summit upstream				28.2931	none	0	0	0	1	0	1
YGL100W	SEH1	R-III	class_IV	IG_1986_genes-complement	tandem						no summit upstream				23.6137	none	0	0	0	1	0	1
YGL101W		R-II	class_IV	IG_1985_genes-complement	divergent						no summit upstream				27.1372	none	0	0	0	1	0	1
YGL102C		R-I	class_IV	IG_1985_genes-complement	divergent						no summit upstream				27.1372	none	1	0	0	1	0	1
YGL103W	RPL28	R-I	class_IV	IG_1984_genes-complement	divergent	chr07	310821	310822	6d_IP_vs_untagged_cer_reps_peak_663	-125	strong	2.83473	126.851	1250	48.9725	any	1	0	0	1	0	1
YGL104C	VPS73	R-III	class_IV	IG_1984_genes-complement	divergent	chr07	310821	310822	6d_IP_vs_untagged_cer_reps_peak_663	-622	strong	2.83473	126.851	1250	48.9725	any	0	0	0	1	0	1
YGL105W	ARC1	R-II	class_IV	IG_1982_genes-complement	tandem						no summit upstream				18.6804	none	1	0	0	1	0	1
YGL106W	MLC1	R-III	class_IV	IG_1981_genes-complement	divergent						no summit upstream				27.0073	none	0	0	0	1	0	1
YGL107C	RMD9	R-III	class_IV	IG_1981_genes-complement	divergent						no summit upstream				27.0073	none	0	0	0	1	0	1
YGL108C		R-III	class_IV	IG_1980_genes-complement	tandem						no summit upstream				21.5468	none	1	0	0	1	0	1
YGL109W		R-III	class_IV	IG_1979_genes-complement	divergent						no summit upstream				26.8706	none	1	0	0	1	0	1
YGL110C	CUE3	R-III	class_IV	IG_1979_genes-complement	divergent						no summit upstream				26.8706	none	0	0	0	1	0	1
YGL111W	NSA1	R-II	class_IV	IG_1977_genes-complement	divergent						no summit upstream				30.5793	none	0	0	0	1	0	1
YGL112C	TAF6	R-III	class_III	IG_1977_genes-complement	divergent						no summit upstream				30.5793	none	0	0	0	1	0	1
YGL113W	SLD3	R-III	class_IV	IG_1975_genes-complement	tandem						no summit upstream				26.4473	none	0	0	0	1	0	1
YGL114W		R-III	class_IV	IG_1974_genes-complement	tandem						no summit upstream				27.8357	none	0	0	0	0	1	0
YGL115W	SNF4	R-III	class_IV	IG_1973_genes-complement	tandem						no summit upstream				32.407	none	1	0	0	1	0	1
YGL116W	CDC20	R-III	class_IV	IG_1972_genes-complement	tandem	chr07	289460	289461	6d_IP_vs_untagged_cer_reps_peak_662	-215	mild	1.8429	33.3706	320	40.283	any	0	0	0	1	0	1
YGL117W		R-I	class_III	IG_1971_genes-complement	divergent	chr07	288473	288474	6d_IP_vs_untagged_cer_reps_peak_661	30	mild	1.52978	14.7792	136	42.8638	any	1	0	0	1	0	1
YGL118C		R-III	class_IV	IG_1971_genes-complement	divergent	chr07	288473	288474	6d_IP_vs_untagged_cer_reps_peak_661	52	mild	1.52978	14.7792	136	42.8638	any	1	0	0	0	0	1
YGL119W	COQ8	R-III	class_IV	IG_1969_genes-complement	divergent						no summit upstream				29.032	none	0	0	0	0	1	0
YGL120C	PRP43	R-I	class_IV	IG_1969_genes-complement	divergent						no summit upstream				29.032	none	0	0	0	1	0	1
YGL121C	GPG1	R-III	class_III	IG_1968_genes-complement	tandem						no summit upstream				44.3461	none	1	1	0	1	0	1
YGL122C	NAB2	R-II	class_III	IG_1967_genes-complement	tandem	chr07	280526	280527	6d_IP_vs_untagged_cer_reps_peak_659	19	mild	2.14649	56.9529	554	59.0714	any	1	0	0	1	0	1
YGL123W	RPS2	R-I	class_III	IG_1965_genes-complement	divergent	chr07	277284	277285	6d_IP_vs_untagged_cer_reps_peak_656	-252	strong	2.88241	132.808	1309	50.9176	any	1	0	0	1	0	1
YGL124C	MON1	R-III	class_IV	IG_1965_genes-complement	divergent	chr07	277284	277285	6d_IP_vs_untagged_cer_reps_peak_656	-543	strong	2.88241	132.808	1309	50.9176	any	0	0	0	0	1	0
YGL125W	MET13	R-III	class_IV	IG_1963_genes-complement	tandem						no summit upstream				53.5773	none	1	0	0	1	0	1
YGL126W	SCS3	R-II	class_II	IG_1962_genes-complement	divergent						no summit upstream				47.8865	none	0	0	1	0	1	0
YGL127C	SOH1	R-II	class_III	IG_1962_genes-complement	divergent						no summit upstream				47.8865	none	1	0	0	1	0	1
YGL128C	CWC23	R-III	class_IV	IG_1961_genes-complement	tandem						no summit upstream				20.6764	none	1	0	0	0	0	1
YGL129C	RSM23	R-II	class_IV	IG_1960_genes-complement	tandem						no summit upstream				31.3442	none	1	0	0	1	0	1
YGL130W	CEG1	R-III	class_III	IG_1958_genes-complement	divergent						no summit upstream				29.4731	none	0	0	0	0	1	0
YGL131C	SNT2	R-III	class_III	IG_1958_genes-complement	divergent						no summit upstream				29.4731	none	0	0	0	0	1	0
YGL132W		R-III	class_III	IG_1957_genes-complement	tandem						no summit upstream				22.2478	none	1	0	0	1	0	1
YGL133W	ITC1	R-II	class_III	IG_1956_genes-complement	tandem						no summit upstream				31.4935	none	1	0	0	1	0	1
YGL134W	PCL10	R-II	class_III	IG_1955_genes-complement	tandem	chr07	255454	255455	6d_IP_vs_untagged_cer_reps_peak_653	-107	mild	1.42487	10.1066	90	39.9666	any	1	0	0	1	0	1
YGL135W	RPL1B	R-II	class_IV	IG_1954_genes-complement	divergent	chr07	254417	254418	6d_IP_vs_untagged_cer_reps_peak_652	-152	strong	2.73519	117.271	1154	49.4905	any	1	0	0	1	0	1
YGL136C	MRM2	R-III	class_IV	IG_1954_genes-complement	divergent	chr07	254417	254418	6d_IP_vs_untagged_cer_reps_peak_652	-511	strong	2.73519	117.271	1154	49.4905	any	1	0	0	1	0	1
YGL137W	SEC27	R-III	class_IV	IG_1952_genes-complement	divergent						no summit upstream				29.3724	none	1	0	0	1	0	1
YGL138C		R-III	class_IV	IG_1952_genes-complement	divergent						no summit upstream				29.3724	none	0	0	0	0	1	0
YGL139W	FLC3	R-II	class_III	IG_1950_genes-complement	divergent						no summit upstream				30.0448	none	0	0	0	1	0	1
YGL140C		R-II	class_III	IG_1950_genes-complement	divergent						no summit upstream				30.0448	none	1	0	0	1	0	1
YGL141W	HUL5	R-III	class_III	IG_1948_genes-complement	divergent	chr07	238347	238348	6d_IP_vs_untagged_cer_reps_peak_651	30	mild	1.46938	12.0822	109	44.1547	any	1	0	0	0	0	1
YGL142C	GPI10	R-III	class_III	IG_1948_genes-complement	divergent	chr07	238347	238348	6d_IP_vs_untagged_cer_reps_peak_651	-177	mild	1.46938	12.0822	109	44.1547	any	0	0	0	0	1	0
YGL143C	MRF1	R-III	class_IV	IG_1947_genes-complement	tandem						no summit upstream				21.1628	none	0	0	0	0	1	0
YGL144C	ROG1	R-II	class_IV	IG_1946_genes-complement	tandem						no summit upstream				39.2869	none	0	0	0	1	0	1
YGL145W	TIP20	R-III	class_III	IG_1944_genes-complement	divergent	chr07	229954	229955	6d_IP_vs_untagged_cer_reps_peak_650	-225	strong	4.70234	402.134	3995	90.7026	any	0	0	0	1	0	1
YGL146C	RRT6	R-III	class_III	IG_1944_genes-complement	divergent	chr07	229954	229955	6d_IP_vs_untagged_cer_reps_peak_650	-189	strong	4.70234	402.134	3995	90.7026	any	1	0	0	1	0	1
YGL147C	RPL9A	R-II	class_IV	IG_1943_genes-complement	tandem	chr07	228576	228577	6d_IP_vs_untagged_cer_reps_peak_649	-227	mild	2.10993	53.648	521	55.7376	any	1	0	0	1	0	1
YGL148W	ARO2	R-II	class_IV	IG_1941_genes-complement	tandem	chr07	226189	226190	6d_IP_vs_untagged_cer_reps_peak_648	-173	mild	1.63309	20.245	190	42.8414	any	0	0	0	1	0	1
YGL151W	NUT1	R-III	class_IV	IG_1939_genes-complement	divergent						no summit upstream				55.7868	none	0	0	0	1	0	1
YGL152C		R-III	class_III	IG_1939_genes-complement	divergent						no summit upstream				55.7868	none	1	0	0	1	0	1
YGL153W	PEX14	R-III	class_III	IG_1938_genes-complement	divergent						no summit upstream				34.552	none	1	0	0	1	0	1
YGL154C	LYS5	R-III	class_IV	IG_1938_genes-complement	divergent						no summit upstream				34.552	none	1	0	0	1	0	1
YGL155W	CDC43	R-III	class_IV	IG_1936_genes-complement	tandem						no summit upstream				30.2329	none	0	0	0	0	1	0
YGL156W	AMS1	R-III	class_III	IG_1935_genes-complement	tandem						no summit upstream				33.0467	none	1	0	0	1	0	1
YGL157W	ARI1	R-II	class_IV	IG_1934_genes-complement	tandem	chr07	208749	208750	6d_IP_vs_untagged_cer_reps_peak_646	-200	mild	1.68714	23.3755	221	41.1317	any	0	0	0	1	0	1
YGL158W	RCK1	R-II	class_IV	IG_1933_genes-complement	tandem	chr07	206411	206412	6d_IP_vs_untagged_cer_reps_peak_645	-497	mild	2.14808	56.9529	554	33.5841	any	0	0	0	0	1	0
YGL158W	RCK1	R-II	class_IV	IG_1933_genes-complement	tandem	chr07	205681	205682	6d_IP_vs_untagged_cer_reps_peak_644	-1227	mild	2.15921	57.9598	564	33.5841	any	0	0	0	0	1	0
YGL159W		R-III	class_IV	IG_1932_genes-complement	tandem						no summit upstream				26.0358	none	0	0	0	0	1	0
YGL160W	AIM14	R-III	class_IV	IG_1931_genes-complement	divergent						no summit upstream				26.5084	none	0	0	0	0	1	0
YGL161C	YIP5	R-III	class_IV	IG_1931_genes-complement	divergent						no summit upstream				26.5084	none	0	0	0	1	0	1
YGL162W	SUT1	R-II	class_IV	IG_1929_genes-complement	divergent	chr07	197540	197541	6d_IP_vs_untagged_cer_reps_peak_643	-525	strong	4.29703	334.019	3315	67.1859	any	0	0	0	1	0	1
YGL163C	RAD54	R-II	class_III	IG_1929_genes-complement	divergent	chr07	197540	197541	6d_IP_vs_untagged_cer_reps_peak_643	-1054	strong	4.29703	334.019	3315	67.1859	any	0	0	0	1	0	1
YGL164C	YRB30	R-III	class_IV	IG_1928_genes-complement	tandem						no summit upstream				23.5928	none	1	0	0	1	0	1
YGL165C		R-II	class_III	IG_1927_genes-complement	tandem						no summit upstream				59.1552	none	1	0	0	1	0	1
YGL166W	CUP2	R-II	class_III	IG_1926_genes-complement	divergent	chr07	190828	190829	6d_IP_vs_untagged_cer_reps_peak_642	-282	mild	2.02251	46.6602	452	54.765	any	1	0	0	0	0	1
YGL167C	PMR-I	R-II	class_III	IG_1926_genes-complement	divergent	chr07	190828	190829	6d_IP_vs_untagged_cer_reps_peak_642	-316	mild	2.02251	46.6602	452	54.765	any	1	0	0	1	0	1
YGL168W	HUR-I	R-II	class_III	IG_1925_genes-complement	tandem						no summit upstream				28.4148	none	1	0	0	1	0	1
YGL169W	SUA5	R-II	class_IV	IG_1924_genes-complement	divergent						no summit upstream				32.1944	none	0	0	0	1	0	1
YGL170C	SPO74	R-III	class_IV	IG_1924_genes-complement	divergent						no summit upstream				32.1944	none	0	0	0	1	0	1
YGL171W	ROK1	R-II	class_IV	IG_1922_genes-complement	tandem						no summit upstream				24.4163	none	0	0	0	1	0	1
YGL172W	NUP49	R-II	class_III	IG_1921_genes-complement	divergent						no summit upstream				33.2404	none	0	0	0	1	0	1
YGL173C	XRN1	R-II	class_III	IG_1921_genes-complement	divergent						no summit upstream				33.2404	none	1	0	0	1	0	1
YGL174W	BUD13	R-III	class_IV	IG_1919_genes-complement	divergent						no summit upstream				36.5577	none	0	0	0	1	0	1
YGL175C	SAE2	R-III	class_IV	IG_1919_genes-complement	divergent						no summit upstream				36.5577	none	0	0	0	1	0	1
YGL176C		R-II	class_IV	IG_1918_genes-complement	tandem						no summit upstream				34.3023	none	0	0	0	1	0	1
YGL178W	MPT5	R-II	class_IV	IG_1916_genes-complement	divergent	chr07	166231	166232	6d_IP_vs_untagged_cer_reps_peak_640	-1022	strong	2.45008	85.3204	836	36.8633	any	1	0	0	1	0	1
YGL179C	TOS3	R-III	class_IV	IG_1916_genes-complement	divergent	chr07	166231	166232	6d_IP_vs_untagged_cer_reps_peak_640	-1102	strong	2.45008	85.3204	836	36.8633	any	0	0	0	0	1	0
YGL180W	ATG1	RØ	class_III	IG_1914_genes-complement	tandem	chr07	159311	159312	6d_IP_vs_untagged_cer_reps_peak_639	-692	strong	3.23368	176.673	1746	66.2502	any	1	0	0	0	0	1
YGL181W	GTS1	R-III	class_III	IG_1913_genes-complement	divergent	chr07	157656	157657	6d_IP_vs_untagged_cer_reps_peak_638	-196	mild	1.64899	21.1193	198	47.8141	any	1	0	0	0	0	1
YGL182C		R-III	class_IV	IG_1913_genes-complement	divergent	chr07	157656	157657	6d_IP_vs_untagged_cer_reps_peak_638	-60	mild	1.64899	21.1193	198	47.8141	any	0	0	0	0	1	0
YGL184C	STR-III	R-III	class_III	IG_1912_genes-complement	tandem	chr07	156332	156333	6d_IP_vs_untagged_cer_reps_peak_637	-267	strong	2.53909	94.102	923	56.2781	any	1	0	0	0	0	1
YGL185C		R-III	class_IV	IG_1911_genes-complement	tandem						no summit upstream				25.9005	none	1	0	0	0	0	1
YGL186C	TPN1	R-III	class_IV	IG_1910_genes-complement	tandem						no summit upstream				31.1241	none	1	0	0	1	0	1
YGL187C	COX4	R-III	class_IV	IG_1909_genes-complement	tandem	chr07	150720	150721	6d_IP_vs_untagged_cer_reps_peak_635	-83	mild	1.49799	13.3098	121	29.8689	any	1	0	0	1	0	1
YGL188C		R-III	class_IV	IG_1908_genes-complement	tandem						no summit upstream				24.3242	none	1	0	0	1	0	1
YGL188C-A		R-II	class_IV	IG_1907_genes-complement	tandem	chr07	149235	149236	6d_IP_vs_untagged_cer_reps_peak_634	-245	strong	2.74731	117	1152	61.059	any	1	0	0	1	0	1
YGL189C	RPS26A	R-I	class_III	IG_1906_genes-complement	tandem						no summit upstream				28.5538	none	1	0	0	1	0	1
YGL190C	CDC55	R-II	class_III	IG_1905_genes-complement	tandem	chr07	147935	147936	6d_IP_vs_untagged_cer_reps_peak_633	-451	mild	1.64422	20.8992	196	38.5309	any	1	0	0	1	0	1
YGL191W	COX13	R-II	class_III	IG_1903_genes-complement	tandem	chr07	144644	144645	6d_IP_vs_untagged_cer_reps_peak_632	-120	mild	1.35335	7.45778	64	37.5603	any	1	0	0	1	0	1
YGL192W	IME4	RØ	class_III	IG_1902_genes-complement	divergent						no summit upstream				26.8651	none	1	0	0	1	0	1
YGL193C		R-II	class_III	IG_1902_genes-complement	divergent						no summit upstream				26.8651	none	1	0	0	1	0	1
YGL194C	HOS2	R-II	class_III	IG_1901_genes-complement	tandem	chr07	141833	141834	6d_IP_vs_untagged_cer_reps_peak_631	-56	mild	1.44475	10.9856	98	43.5328	any	1	0	0	1	0	1
[truncated: 3,915 more rows]
