# Supplementary material for: Intergenic accumulation of RNA polymerase II maintains the potential for swift transcriptional restart upon release from quiescence
Source: HighWire-hosted journal article supplement (doi:10.1101/gr.279874.124), 2025-08-12
Supplement: Supplemental_Table_S5.xlsx [file Supplemental_Table_S5.xlsx]

## Sheet: README
Transcription Factor Binding Sites (TFBS) enriched within 100bp of RNAPII quiescent summits falling in promoter-bearing intergenes
ALT_ID	An alternate name for the motif that may be provided in the motif database file. Here, SGD Standard Name		MEME SEA output verbatim
RANK	The rank of the significance (E-value) of the motif in the sorted results.		MEME SEA output verbatim + additional comment
DB	The name of a file of motifs ("motif database file") that contains motif.		Variable specific to this study
ID	The name of the motif, which is unique in the motif database file.
CONSENSUS	A consensus sequence computed from the motif
TP	The number of primary sequences matching the motif / the number of primary sequences (the percentage of primary sequences matching the motif). A sequence is said to match the motif if some position within it has match score greater than or equal to the optimal threshold (Score Threshold).
TP.	The percentage of primary sequences matching the motif with scores greater than or equal to the optimal match score threshold.
FP	The number of control sequences matching the motif / the number of control sequences (the percentage of control sequences matching the motif). A sequence is said to match the motif if some position within it has match score greater than or equal to the optimal threshold (Score Threshold).
FP.	The percentage of control sequences matching the motif with scores greater than or equal to the optimal match score threshold.
ENR_RATIO	The relative enrichment ratio of the motif in the primary vs. control sequences, defined as Ratio = ((TP+1)/(NPOS+1)) / ((FP+1)/(NNEG+1)), where NPOS is the number of primary sequences in the input, and NNEG is the number of control sequences in the input.
SCORE_THR	The match score threshold giving the optimal p-value. This is the score threshold used by SEA to determine the values of "TP" and "FP". SEA uses the hold-out sequence set to determine the score threshold unless there are too few sequences in the input.
PVALUE	The optimal enrichment p-value of the motif according to the statistical test. Not adjusted for the number of motifs. If there are too few sequences in the input to create a hold-out sequence set, motifs with the same values of TP and FP can have different p-values. This is because a variable correction has been applied to adjust for testing multiple score thresholds.
LOG_PVALUE	The logarithm of PVALUE.
EVALUE	The expected number of random motifs that would be as enriched in the primary sequences as this one. The E-value is the p-value multiplied by the number of motifs in the motif file(s).
LOG_EVALUE	The logarithm of EVALUE.
QVALUE	The q-value is the minimum False Discovery Rate (FDR) required to consider this motif significant. SEA estimates q-values from all the motif p-values using the method proposed by Benjamini & Hochberg (Journal of the Royal Statistical Society B, 57:289-300, 1995). See also Storey JD, Tibshirani R. Statistical significance for genome-wide studies, Proc. Natl. Acad. Sci. USA (2003) 100:9440–9445. No…
LOG_QVALUE	The logarithm of QVALUE.
sample	set of test sequences
control_seq	set of control sequences
max_ENR_RATIO	max(ENR_RATIO) grouped by ALT_ID and sample
TP.motif.sample	sum(TP.) grouped by sample
gene_id	Systematic Name SGD
gene_name	Standard Name SGD
gene_name_expanded	Standard Name expanded acronym
gene_function	Gene function in SGD

## Sheet: TFBS_ENRICHED_WITHIN_50BP
ALT_ID	RANK	DB	ID	CONSENSUS	TP	TP.	FP	FP.	ENR_RATIO	SCORE_THR	PVALUE	LOG_PVALUE	EVALUE	LOG_EVALUE	QVALUE	LOG_QVALUE	sample	control_seq	max_ENR_RATIO	TP.motif.sample	gene_id	gene_name	gene_name_expanded	gene_function
ABF1	98	motif_db/JASPAR/JASPAR2022_CORE_fungi_redundant_v2.meme	MA0265.1	YCGTRNRNVRTGAYHH	46	9.96	130	4.31	2.34	9.3	2.03e-06	-13.11	0.000394	-7.84	1.42e-06	-13.46	strong_peaks	loc250	2.34	9.96	YKL112W	ABF1	ARS-Binding Factor 1	Sequence specific DNA-binding RNA polymerase II transcription factor; involved in chromatin silencing and remodeling; binds replication origins and is involved in DNA replication; subunit of nucleotide-excision repair factor 4 complex
ACE2	52	motif_db/JASPAR/JASPAR2022_CORE_fungi_redundant_v2.meme	MA0267.1	MCCAGCA	248	53.68	947	31.39	1.71	4.2	3.73e-20	-44.74	7.24e-18	-39.47	4.94e-20	-44.45	strong_peaks	loc250	1.71	53.68	YLR131C	ACE2	Activator of CUP1 Expression	Sequence-specific DNA binding RNA polymerase II transcription factor involved in G1/S transition of the mitotic cell cycle; activates cytokinetic cell separation; also regulates antisense transcription at diverse loci; localizes to both nucleus and cytosol
ADR1	58	motif_db/JASPAR/JASPAR2022_CORE_fungi_redundant_v2.meme	MA0268.1	HCCCCAM	185	40.04	619	20.52	1.96	6.4	1.12e-18	-41.34	2.17e-16	-36.07	1.33e-18	-41.16	strong_peaks	loc250	1.96	40.04	YDR216W	ADR1	Alcohol Dehydrogenase II synthesis Regulator	Sequence specific DNA-binding RNA polymerase II transcription factor that activates expression of genes involved in peroxisome organization, ethanol, glycerol, and fatty acid utilization
AFT1	79	motif_db/JASPAR/JASPAR2022_CORE_fungi_redundant_v2.meme	MA0269.1	KBNBMTAKTGCACCCSNWWBS	234	50.65	1052	34.87	1.45	1.5	7.95e-11	-23.26	1.54e-08	-17.99	6.93e-11	-23.39	strong_peaks	loc250	1.45	50.65	YGL071W	AFT1	Activator of Ferrous Transport	Sequence-specific DNA binding transcription factor that regulates chromatid cohesion, chromosome segregation, and cellular iron homeostasis; localizes to the cytoplasm, nucleus, and kinetochores
AFT2	40	motif_db/JASPAR/JASPAR2022_CORE_fungi_redundant_v2.meme	MA0270.1	SACACCCB	192	41.56	548	18.16	2.29	0.2	9.2e-27	-59.95	1.79e-24	-54.68	1.58e-26	-59.41	strong_peaks	loc250	2.29	41.56	YPL202C	AFT2	Activator of Fe (iron) Transcription	Sequence-specific DNA binding transcription factor that regulates cellular iron homeostasis and oxidative stress response; localizes to both nucleus and mitochondria
ARO80	32	motif_db/JASPAR/JASPAR2022_CORE_fungi_redundant_v2.meme	MA0273.1	GNBMRHKCTCGGBAABWNNDN	177	38.31	454	15.05	2.55	4.4	8.18e-29	-64.67	1.59e-26	-59.41	1.76e-28	-63.91	strong_peaks	loc250	2.55	38.31	YDR421W	ARO80	AROmatic amino acid requiring	Sequence specific DNA-binding transcriptional activator of genes involved in aromatic amino acid catabolism; localized to nucleus
ASG1	27	motif_db/JASPAR/JASPAR2022_CORE_fungi_redundant_v2.meme	MA0275.1	CCGGAW	188	40.69	495	16.41	2.48	0.013	8.27e-30	-66.96	1.6e-27	-61.7	2.11e-29	-66.03	strong_peaks	loc250	2.48	40.69	YIL130W	ASG1	Activator of Stress Genes	Sequence-specific DNA binding protein; localizes to nucleus
ASH1	57	motif_db/JASPAR/JASPAR2022_CORE_fungi_redundant_v2.meme	MA0276.1	CCGVATCRGG	195	42.21	669	22.17	1.91	4.3	7.07e-19	-41.79	1.37e-16	-36.53	8.53e-19	-41.6	strong_peaks	loc250	1.91	42.21	YKL185W	ASH1	Asymmetric Synthesis of HO	Sequence-specific DNA binding RNA Pol II transcription factor that up and down regulates transcription; its role as transcription repressor negatively regulates mating type switching, G1/S transition of mitotic cell cycle; its role as transcription activator positively regulates pseudohyphal growth; subunit of the Rpd3L histone deacetylase complex; also localizes to the cellular bud
AZF1	101	motif_db/JASPAR/JASPAR2022_CORE_fungi_redundant_v2.meme	MA0277.1	AAAAAGAAA	24	5.19	48	1.59	3.33	11	8.35e-06	-11.69	0.00162	-6.43	5.69e-06	-12.08	strong_peaks	loc250	3.33	5.19	YOR113W	AZF1	Asparagine-rich Zinc-Finger	Sequence-specific DNA-binding transcription activator involved in carbohydrate sensing and cell wall organization; localizes to both the cytosol and nucleus
BAS1	84	motif_db/JASPAR/JASPAR2022_CORE_fungi_redundant_v2.meme	MA0278.1	BCWYRGCCVGAGTCARDWBRV	84	18.18	249	8.25	2.22	3.5	4.03e-10	-21.63	7.83e-08	-16.36	3.3e-10	-21.83	strong_peaks	loc250	2.22	18.18	YKR099W	BAS1	BASal	Sequence-specific DNA binding RNA polymerase II transcription activator
CAT8	33	motif_db/JASPAR/JASPAR2022_CORE_fungi_redundant_v2.meme	MA0280.1	CCGGAN	125	27.06	238	7.89	3.44	0.96	1.66e-28	-63.96	3.23e-26	-58.7	3.47e-28	-63.23	strong_peaks	loc250	3.44	27.06	YMR280C	CAT8	CATabolite repression	Sequence-specific DNA binding transcription factor involved in the regulation of gluconeogenesis and the glyoxylate cycle
CBF1	110	motif_db/JASPAR/JASPAR2022_CORE_fungi_redundant_v2.meme	MA0281.1	GCACGTGA	79	17.1	343	11.37	1.52	1.2	0.00047	-7.66	0.0912	-2.39	0.000294	-8.13	strong_peaks	loc250	1.52	33.55	YJR060W	CBF1	Centromere Binding Factor	Sequence specific DNA-binding RNA polymerase II transcription activator and repressor; subunit of the Cbf1-Met4-Met28 complex; activates transcription of genes involved in inositol biosynthetic process and sulfate assimilation and represses transcription of genes involved in ceramide biosynthetic process; localized to the mitochondrion in high-throughput studies
CBF1	113	motif_db/JASPAR/JASPAR2022_CORE_fungi_redundant_v2.meme	MA0281.2	WDRTCACGTGAYHND	76	16.45	335	11.1	1.49	1.6	0.000898	-7.01	0.174	-1.75	0.000547	-7.51	strong_peaks	loc250	1.52	33.55	YJR060W	CBF1	Centromere Binding Factor	Sequence specific DNA-binding RNA polymerase II transcription activator and repressor; subunit of the Cbf1-Met4-Met28 complex; activates transcription of genes involved in inositol biosynthetic process and sulfate assimilation and represses transcription of genes involved in ceramide biosynthetic process; localized to the mitochondrion in high-throughput studies
CEP3	53	motif_db/JASPAR/JASPAR2022_CORE_fungi_redundant_v2.meme	MA0282.1	YTCGGAAV	182	39.39	583	19.32	2.04	1.6	4.39e-20	-44.57	8.52e-18	-39.3	5.7e-20	-44.31	strong_peaks	loc250	2.04	39.39	YMR168C	CEP3	CEntromere Protein	Subunit of the CBF3 complex of the kinetochore; has roles in septin ring assembly and mitotic spindle assembly checkpoint signaling
CHA4	17	motif_db/JASPAR/JASPAR2022_CORE_fungi_redundant_v2.meme	MA0283.1	GGCGGAGW	163	35.28	352	11.67	3.03	2.6	3.59e-33	-74.71	6.97e-31	-69.44	1.38e-32	-73.36	strong_peaks	loc250	3.03	35.28	YLR098C	CHA4	Catabolism of Hydroxy Amino acids	Sequence-specific DNA-binding transcription factor involved in amino acid catabolism; localizes to nucleus
cre-1	41	motif_db/JASPAR/JASPAR2022_CORE_fungi_redundant_v2.meme	MA1432.1	CCCCRBNN	133	28.79	286	9.48	3.04	8.6	2.05e-26	-59.15	3.97e-24	-53.88	3.43e-26	-58.63	strong_peaks	loc250	3.04	28.79
CRZ1	36	motif_db/JASPAR/JASPAR2022_CORE_fungi_redundant_v2.meme	MA0285.1	CNVMGCCHC	367	79.44	1609	53.33	1.49	1.5	6.46e-28	-62.61	1.25e-25	-57.34	1.24e-27	-61.96	strong_peaks	loc250	1.49	79.44	YNL027W	CRZ1	Calcineurin-Responsive Zinc finger	Sequence-specific DNA-binding RNA polymerase II transcription activator involved in ion homeostasis, cell wall chitin biosynthesis, and the cellular response to blue light; involved in positive regulation of transcription in response to calcium ions, increased salt, alkaline pH, and pheromones; localizes to the nucleus and cytoplasm
CUP2	114	motif_db/JASPAR/JASPAR2022_CORE_fungi_redundant_v2.meme	MA0287.1	CAGCRRAAAWG	57	12.34	234	7.76	1.61	6	0.00104	-6.87	0.201	-1.61	0.000625	-7.38	strong_peaks	loc250	1.61	12.34	YGL166W	CUP2		Transcription factor that binds in a sequence-specific manner to DNA proximal to the RNA polymerase II core promoter; activates transcription of target genes in response to copper; localizes to the nucleus
DAL82	66	motif_db/JASPAR/JASPAR2022_CORE_fungi_redundant_v2.meme	MA0291.1	AWWDTGCGC	223	48.27	878	29.1	1.66	4.4	8e-16	-34.76	1.55e-13	-29.49	8.34e-16	-34.72	strong_peaks	loc250	1.66	48.27	YNL314W	DAL82	Degradation of Allantoin	A sequence-specific DNA binding transcription factor involved in both allantoin breakdown and nitrogen catabolite activation of transcription from RNA polymerase II promoter; localized to nucleus
DOT6	108	motif_db/JASPAR/JASPAR2022_CORE_fungi_redundant_v2.meme	MA0351.1	DNBBDCWSCTCATCGCNYCYT	54	11.69	198	6.56	1.8	7.1	0.000136	-8.9	0.0264	-3.63	8.68e-05	-9.35	strong_peaks	loc250	1.8	11.69	YER088C	DOT6	Disruptor Of Telomeric silencing	Sequence-specific DNA binding protein involved in chromatin silencing, tRNA gene-mediated silencing, and regulation of RNA polymerase II transcription
ECM22	19	motif_db/JASPAR/JASPAR2022_CORE_fungi_redundant_v2.meme	MA0292.1	HTCCGGA	281	60.82	955	31.65	1.92	0.4	8.93e-33	-73.8	1.73e-30	-68.53	3.24e-32	-72.51	strong_peaks	loc250	1.92	60.82	YLR228C	ECM22	ExtraCellular Mutant	DNA binding RNA polymerase transcription activator involved in positive regulation of transcription by RNA polymerase II; localizes to nucleus and perinuclear region of cytoplasm
EDS1	95	motif_db/JASPAR/JASPAR2022_CORE_fungi_redundant_v2.meme	MA0294.1	CGGAAMAAT	60	12.99	173	5.73	2.29	9.6	8.52e-08	-16.28	1.65e-05	-11.01	6.17e-08	-16.6	strong_peaks	loc250	2.29	12.99	YBR033W	EDS1	Expression Dependent on Slt2	Sequence specific DNA binding protein
ERT1	82	motif_db/JASPAR/JASPAR2022_CORE_fungi_redundant_v2.meme	MA0420.1	AYCGGAAC	50	10.82	103	3.41	3.2	9.3	1.85e-10	-22.41	3.58e-08	-17.14	1.55e-10	-22.59	strong_peaks	loc250	3.2	10.82	YBR239C	ERT1	Ethanol Regulated Transcription factor	Sequence-specific DNA-binding transcription regulator involved in gluconeogenesis and respiration; localizes to both nucleus and cytoplasm
FHL1	106	motif_db/JASPAR/JASPAR2022_CORE_fungi_redundant_v2.meme	MA0295.1	GACGCAMA	150	32.47	725	24.03	1.36	0.4	8.76e-05	-9.34	0.017	-4.07	5.69e-05	-9.77	strong_peaks	loc250	1.36	32.47	YPR104C	FHL1	Fork Head-Like	Transcription regulator-binding protein involved in the regulation of ribosomal protein gene transcription
GAL4	56	motif_db/JASPAR/JASPAR2022_CORE_fungi_redundant_v2.meme	MA0299.1	CGGNSVASAGTRBTC	76	16.45	129	4.28	3.86	7.8	3.72e-19	-42.44	7.21e-17	-37.17	4.57e-19	-42.23	strong_peaks	loc250	3.86	16.45	YPL248C	GAL4	GALactose metabolism	Sequence-specific DNA-binding RNA polymerase II transcription factor involved positive regulation of transcription in response to galactose; also binds and recruits other transcription factors
GIS1	85	motif_db/JASPAR/JASPAR2022_CORE_fungi_redundant_v2.meme	MA0306.1	HCCCCTWWN	63	13.64	158	5.24	2.62	9.1	4.58e-10	-21.5	8.89e-08	-16.24	3.71e-10	-21.71	strong_peaks	loc250	2.62	13.64	YDR096W	GIS1	GIg1-2 Suppressor	H3-K36 specific histone demethylase and sequence-specific DNA-binding transcription factor; involved in regulation of phospholipid biosynthesis; localizes to nucleus, relocalizes to cytosol in response to hypoxia
GSM1	6	motif_db/JASPAR/JASPAR2022_CORE_fungi_redundant_v2.meme	MA0308.1	NKNANDWAWCTCCGGARTDNN	260	56.28	755	25.02	2.25	0.22	1.81e-39	-89.21	3.5e-37	-83.94	2.07e-38	-86.77	strong_peaks	loc250	2.25	56.28	YJL103C	GSM1	Glucose Starvation Modulator	Sequence-specific DNA binding transcription factor implicated in oxidative phosphorylation
HAC1	102	motif_db/JASPAR/JASPAR2022_CORE_fungi_redundant_v2.meme	MA0310.1	GACACGTR	122	26.41	538	17.83	1.49	0.11	1.52e-05	-11.1	0.00294	-5.83	1.02e-05	-11.49	strong_peaks	loc250	1.49	26.41	YFL031W	HAC1	Homologous to Atf/Creb1	Sequence-specific DNA-binding RNA polymerase II transcription factor involved in regulation of the unfolded protein response; also negatively regulates transcription during meiosis
HAL9	14	motif_db/JASPAR/JASPAR2022_CORE_fungi_redundant_v2.meme	MA0311.1	CGGAR	185	40.04	434	14.39	2.79	9.7	1.19e-34	-78.11	2.31e-32	-72.84	5.86e-34	-76.52	strong_peaks	loc250	2.79	40.04	YOL089C	HAL9	HALotolerance	Sequence-specific DNA binding protein involved in positive regulation of positive regulation of transcription by RNA polymerase II; localizes to nucleus and mitochondria
HAP1	30	motif_db/JASPAR/JASPAR2022_CORE_fungi_redundant_v2.meme	MA0312.1	CGGAGWTA	190	41.13	514	17.04	2.42	5.8	6.4e-29	-64.92	1.24e-26	-59.65	1.47e-28	-64.09	strong_peaks	loc250	2.42	41.13	YLR256W	HAP1	Heme Activator Protein	A transcription factor that binds to sequence-specific DNA proximal to RNA polymerase II core promoter that is involved in regulation of transcription in response to hypoxia; localized to both the nucleus and mitochondrion
IME1	35	motif_db/JASPAR/JASPAR2022_CORE_fungi_redundant_v2.meme	MA0320.1	CCGCCGAG	88	19.05	115	3.81	5	0.58	4.86e-28	-62.89	9.43e-26	-57.62	9.55e-28	-62.22	strong_peaks	loc250	5	19.05	YJR094C	IME1	Inducer of MEiosis	Transcription factor that regulates meiosis; involved in pseudohyphal growth; localizes to the nucleus
INO2	117	motif_db/JASPAR/JASPAR2022_CORE_fungi_redundant_v2.meme	MA0321.1	GCATGTGAA	144	31.17	758	25.12	1.25	2.1	0.00384	-5.56	0.745	-0.29	0.00226	-6.09	strong_peaks	loc250	1.25	31.17	YDR123C	INO2	INOsitol requiring	Component of sequence specific DNA-binding heteromeric transcription factor Ino2/Ino4p that activates transcription of genes involved in phospholipid metabolism
LEU3	42	motif_db/JASPAR/JASPAR2022_CORE_fungi_redundant_v2.meme	MA0324.1	CCKKHWSCGG	102	22.08	174	5.77	3.84	2.6	9.4e-26	-57.63	1.82e-23	-52.36	1.54e-25	-57.13	strong_peaks	loc250	3.84	22.08	YLR451W	LEU3	LEUcine biosynthesis	Sequence-specific DNA binding RNA Polymerase II transcription factor that acts as both an activator and a repressor of genes involved in leucine biosynthesis; localizes to nucleus
LYS14	68	motif_db/JASPAR/JASPAR2022_CORE_fungi_redundant_v2.meme	MA0325.1	CCGGAATT	272	58.87	1199	39.74	1.48	0.43	9.87e-15	-32.25	1.91e-12	-26.98	9.99e-15	-32.24	strong_peaks	loc250	1.48	58.87	YDR034C	LYS14	LYSine requiring	Sequence-specific DNA-binding RNA polymerase II transcription factor that regulates expression of genes involved in lysine biosynthesis
MBP1	34	motif_db/JASPAR/JASPAR2022_CORE_fungi_redundant_v2.meme	MA0329.1	ACGCGWN	140	30.3	300	9.94	3.05	7.7	4.2e-28	-63.04	8.15e-26	-57.77	8.51e-28	-62.33	strong_peaks	loc250	3.05	30.3	YDL056W	MBP1	MluI-box Binding Protein	Sequence-specific DNA binding transcription factor that positively regulates transcription by RNA polymerase II involved in the G1/S transition of mitosis; subunit of the MBF (Mlu1 cell cycle box Binding Factor) transcription complex
MBP1::SWI6	55	motif_db/JASPAR/JASPAR2022_CORE_fungi_redundant_v2.meme	MA0330.1	ACGCGTY	305	66.02	1316	43.62	1.51	1.9	1.5e-19	-43.34	2.91e-17	-38.08	1.88e-19	-43.12	strong_peaks	loc250	1.51	66.02
MCM1	76	motif_db/JASPAR/JASPAR2022_CORE_fungi_redundant_v2.meme	MA0331.1	CCNDWTTRGGAA	183	39.61	717	23.77	1.67	4.2	2.18e-12	-26.85	4.22e-10	-21.59	1.97e-12	-26.95	strong_peaks	loc250	1.67	39.61	YMR043W	MCM1	MiniChromosome Maintenance	Sequence-specific DNA-binding RNA polymerase II transcription activator and repressor; involved in the regulation of mating type switching, mating-type specific transcription, arginine metabolism, and G2/M transition of mitotic cell cycle; binds DNA replication origins and is involved in DNA replication initiation; localizes to the cytosol, nucleus, and nuclear chromatin
MET28	96	motif_db/JASPAR/JASPAR2022_CORE_fungi_redundant_v2.meme	MA0332.1	CTGTGG	64	13.85	201	6.66	2.1	0.66	4.01e-07	-14.73	7.78e-05	-9.46	2.88e-07	-15.06	strong_peaks	loc250	2.1	13.85	YIR017C	MET28	METhionine	Transcriptional activator subunit of Cbf1-Met4-Met28 complex involved in transcriptional activation of genes involved in sulfur amino acid metabolism
MET31	93	motif_db/JASPAR/JASPAR2022_CORE_fungi_redundant_v2.meme	MA0333.1	RNTGTGGCG	123	26.62	471	15.61	1.71	1.2	1.73e-08	-17.87	3.36e-06	-12.6	1.28e-08	-18.17	strong_peaks	loc250	1.71	26.62	YPL038W	MET31	METhionine requiring	Cis-regulatory region sequence-specific DNA binding protein involved in RNA polymerase II mediated negative and positive regulation of transcription, localizes to cytoplasm and nucleus
MET32	78	motif_db/JASPAR/JASPAR2022_CORE_fungi_redundant_v2.meme	MA0334.1	MGCCACA	383	82.9	2045	67.78	1.22	0.25	4.09e-12	-26.22	7.94e-10	-20.95	3.61e-12	-26.35	strong_peaks	loc250	1.22	82.9	YDR253C	MET32	METhionine requiring	Cis-regulatory region sequence-specific DNA binding protein involved in RNA polymerase II mediated negative and positive regulation of transcription, localizes to cytoplasm and nucleus
MIG1	24	motif_db/JASPAR/JASPAR2022_CORE_fungi_redundant_v2.meme	MA0337.1	HCCCCRS	293	63.42	1044	34.6	1.83	1.3	1.4e-31	-71.05	2.71e-29	-65.78	4e-31	-69.99	strong_peaks	loc250	1.83	63.42	YGL035C	MIG1	Multicopy Inhibitor of GAL gene expression	Sequence-specific DNA binding transcription factor involved in the regulation of transcription by RNA polymerase II in response to glucose and starvation
MIG2	11	motif_db/JASPAR/JASPAR2022_CORE_fungi_redundant_v2.meme	MA0338.1	CCCCRCV	236	51.08	670	22.21	2.3	3.6	1.27e-35	-80.35	2.47e-33	-75.08	7.95e-35	-78.52	strong_peaks	loc250	2.3	51.08	YGL209W	MIG2	Multicopy Inhibitor of GAL gene expression	RNA polymerase II proximal promoter sequence-specific DNA binding protein involved in negative and positive regulation by RNA polymerase II; localizes to mitochondria and nucleus
MIG3	16	motif_db/JASPAR/JASPAR2022_CORE_fungi_redundant_v2.meme	MA0339.1	CCCCRCV	188	40.69	458	15.18	2.68	6.2	1.61e-33	-75.51	3.13e-31	-70.24	6.93e-33	-74.05	strong_peaks	loc250	2.68	40.69	YER028C	MIG3	Multicopy Inhibitor of Growth	Sequence-specific DNA binding transcription regulator involved in response to various stressors including UV and ethanol
msn-1	92	motif_db/JASPAR/JASPAR2022_CORE_fungi_redundant_v2.meme	MA1433.1	VCCCCTDA	247	53.46	1189	39.41	1.36	3.1	9.53e-09	-18.47	1.85e-06	-13.2	7.13e-09	-18.76	strong_peaks	loc250	1.36	53.46
MSN2	43	motif_db/JASPAR/JASPAR2022_CORE_fungi_redundant_v2.meme	MA0341.1	RGGGG	137	29.65	310	10.28	2.89	8.5	1.48e-25	-57.17	2.87e-23	-51.9	2.37e-25	-56.7	strong_peaks	loc250	2.89	29.65	YMR037C	MSN2	Multicopy suppressor of SNF1 mutation	Sequence-specific DNA-binding RNA polymerase II transcription factor involved in the regulation of transcription in response to a wide variety of stresses; shuttles between nucleus and cytoplasm
MSN4	29	motif_db/JASPAR/JASPAR2022_CORE_fungi_redundant_v2.meme	MA0342.1	AGGGG	217	46.97	641	21.25	2.21	0.18	1.49e-29	-66.38	2.89e-27	-61.11	3.53e-29	-65.51	strong_peaks	loc250	2.21	46.97	YKL062W	MSN4	Multicopy suppressor of SNF1 mutation	Sequence-specific DNA-binding transcription factor involved in the regulation of transcription in response to a wide variety of stresses; shuttles between nucleus and cytoplasm
NCU02182	105	motif_db/JASPAR/JASPAR2022_CORE_fungi_redundant_v2.meme	MA1434.1	WACCCAB	51	11.04	177	5.87	1.9	7.3	6.59e-05	-9.63	0.0128	-4.36	4.32e-05	-10.05	strong_peaks	loc250	1.9	11.04
NDT80	75	motif_db/JASPAR/JASPAR2022_CORE_fungi_redundant_v2.meme	MA0343.1	HHTHCKGMCACAAAAACSVDA	320	69.26	1560	51.71	1.34	0.15	6.23e-13	-28.1	1.21e-10	-22.84	5.72e-13	-28.19	strong_peaks	loc250	1.34	69.26	YHR124W	NDT80	Non-DiTyrosine	Sequence-specific DNA binding transcription factor that activates transcription of middle sporulation genes by RNA polymerase II
NHP10	21	motif_db/JASPAR/JASPAR2022_CORE_fungi_redundant_v2.meme	MA0344.1	GCCGGGGA	185	40.04	456	15.11	2.65	0.072	2.67e-32	-72.7	5.18e-30	-67.43	8.75e-32	-71.51	strong_peaks	loc250	2.65	40.04	YDL002C	NHP10	Non-Histone Protein	DNA loop- and end-binding subunit of the INO80 chromatin remodeling complex; involved in telomere maintenance, double strand break repair, and chromatin remodeling
nit-4	13	motif_db/JASPAR/JASPAR2022_CORE_fungi_redundant_v2.meme	MA1435.1	NTCCGCGGRN	99	21.43	114	3.78	5.67	0.54	7.09e-35	-78.63	1.38e-32	-73.36	3.75e-34	-76.96	strong_peaks	loc250	5.67	21.43
NRG1	90	motif_db/JASPAR/JASPAR2022_CORE_fungi_redundant_v2.meme	MA0347.1	YNNNRYMAGGGTCCWNBGVN	150	32.47	608	20.15	1.62	0.54	6.55e-09	-18.84	1.27e-06	-13.58	5.01e-09	-19.11	strong_peaks	loc250	1.88	72.95	YDR043C	NRG1	Negative Regulator of Glucose-repressed genes	Sequence-specific DNA binding transcription factor that regulates transcription by RNA polymerase II; involved in regulation of pseudohyphal growth, biofilm formation, hyperosmotic response, and glucose sensing
NRG1	62	motif_db/JASPAR/JASPAR2022_CORE_fungi_redundant_v2.meme	MA0347.2	DHMAGGGTCCDWT	187	40.48	651	21.58	1.88	1.4	2.68e-17	-38.16	5.2e-15	-32.89	2.97e-17	-38.05	strong_peaks	loc250	1.88	72.95	YDR043C	NRG1	Negative Regulator of Glucose-repressed genes	Sequence-specific DNA binding transcription factor that regulates transcription by RNA polymerase II; involved in regulation of pseudohyphal growth, biofilm formation, hyperosmotic response, and glucose sensing
NSI1	100	motif_db/JASPAR/JASPAR2022_CORE_fungi_redundant_v2.meme	MA0421.1	TTTACCCGGM	37	8.01	96	3.18	2.55	0.027	4.49e-06	-12.31	0.00087	-7.05	3.09e-06	-12.69	strong_peaks	loc250	2.55	8.01	YDR026C	NSI1	NTS1 SIlencing protein 1	Nucleolar protein involved in termination of rRNA transcription by RNA polymerase I and silencing at rDNA locus
nuc-1	86	motif_db/JASPAR/JASPAR2022_CORE_fungi_redundant_v2.meme	MA1436.1	CCACGTGH	40	8.66	72	2.39	3.66	0.18	7.1e-10	-21.07	1.38e-07	-15.8	5.68e-10	-21.29	strong_peaks	loc250	3.66	8.66
OAF1	5	motif_db/JASPAR/JASPAR2022_CORE_fungi_redundant_v2.meme	MA0348.1	YCGGRGATA	234	50.65	596	19.75	2.57	4.3	7.02e-42	-94.76	1.36e-39	-89.49	9.66e-41	-92.14	strong_peaks	loc250	2.57	50.65	YAL051W	OAF1	Oleate-Activated transcription Factor	Subunit of the heterodimeric Pip2-Oaf1 complex, which binds to promoter proximal elements upstream of genes involved in peroxisomal proliferation, functioning as a transcriptional activator in the presence of oleate; regulates chromatin silencing at telomeres
OPI1	99	motif_db/JASPAR/JASPAR2022_CORE_fungi_redundant_v2.meme	MA0349.1	CGAACCV	40	8.66	108	3.58	2.45	10	4.01e-06	-12.43	0.000777	-7.16	2.79e-06	-12.79	strong_peaks	loc250	2.45	8.66	YHL020C	OPI1	OverProducer of Inositol	Transcription corepressor and phosphatidic acid-binding protein; regulates transcription from RNA polymerase II promoters and negatively regulates phospholipid biosynthesis; involved in the endoplasmic reticulum unfolded protein response; localizes to the endoplasmic reticulum and to various components of the nucleus
PDR1	23	motif_db/JASPAR/JASPAR2022_CORE_fungi_redundant_v2.meme	MA0352.1	YCCGCGGA	110	23.81	162	5.37	4.44	8.3	4.83e-32	-72.11	9.37e-30	-66.84	1.44e-31	-71.01	strong_peaks	loc250	4.44	47.19	YGL013C	PDR1	Pleiotropic Drug Resistance	Sequence specific DNA-binding polymerase II transcription factor that activates expression of genes involved in drug response
PDR1	59	motif_db/JASPAR/JASPAR2022_CORE_fungi_redundant_v2.meme	MA0352.2	NNTTCCRCGGAANN	108	23.38	257	8.52	2.75	4.4	2.01e-18	-40.75	3.9e-16	-35.48	2.35e-18	-40.59	strong_peaks	loc250	4.44	47.19	YGL013C	PDR1	Pleiotropic Drug Resistance	Sequence specific DNA-binding polymerase II transcription factor that activates expression of genes involved in drug response
PDR3	94	motif_db/JASPAR/JASPAR2022_CORE_fungi_redundant_v2.meme	MA0353.1	TCCGCGGA	16	3.46	12	0.4	8.52	5.1	4.82e-08	-16.85	9.34e-06	-11.58	3.53e-08	-17.16	strong_peaks	loc250	8.52	3.46	YBL005W	PDR3	Pleiotropic Drug Resistance	Sequence specific DNA-binding polymerase II transcription factor that activates expression of genes involved in drug response
PDR8	49	motif_db/JASPAR/JASPAR2022_CORE_fungi_redundant_v2.meme	MA0354.1	RCGGAGAT	118	25.54	260	8.62	2.97	2.7	1.86e-22	-50.04	3.6e-20	-44.77	2.61e-22	-49.7	strong_peaks	loc250	2.97	25.54	YLR266C	PDR8	Pleiotropic Drug Resistance	DNA-binding transcription factor involved in positive regulation of transcription in response to stress
PHD1	69	motif_db/JASPAR/JASPAR2022_CORE_fungi_redundant_v2.meme	MA0355.1	NSMTGCABVN	335	72.51	1625	53.86	1.35	2.5	1.18e-14	-32.07	2.29e-12	-26.8	1.18e-14	-32.07	strong_peaks	loc250	1.35	72.51	YKL043W	PHD1	PseudoHyphal Determinant	Nuclear DNA-binding transcription factor involved in activation of RNA Pol II transcription and pseudohyphal growth
PHO4	87	motif_db/JASPAR/JASPAR2022_CORE_fungi_redundant_v2.meme	MA0357.1	SCACGTGS	78	16.88	227	7.52	2.26	5.1	9.68e-10	-20.76	1.88e-07	-15.49	7.65e-10	-20.99	strong_peaks	loc250	2.26	16.88	YFR034C	PHO4	PHOsphate metabolism	Sequence specific DNA-binding RNA polymerase II transcription factor that activates expression of genes involved in the response to phosphate starvation such as PHO5; relocates to the nucleus during phosphate starvation
PUT3	18	motif_db/JASPAR/JASPAR2022_CORE_fungi_redundant_v2.meme	MA0358.1	CCCGGGAW	194	41.99	489	16.21	2.59	1	3.6e-33	-74.7	6.99e-31	-69.44	1.38e-32	-73.36	strong_peaks	loc250	2.59	41.99	YKL015W	PUT3	Proline UTilization	DNA and zinc ion binding protein; binds RNA polymerase II cis-regulatory regions; positive regulation of transcription by RNA polymerase II; localized to the nucleus
RAP1	74	motif_db/JASPAR/JASPAR2022_CORE_fungi_redundant_v2.meme	MA0359.1	CACCCATACA	28	6.06	20	0.66	9	12	1.71e-13	-29.4	3.31e-11	-24.13	1.59e-13	-29.47	strong_peaks	loc250	9	13.42	YNL216W	RAP1	Repressor/Activator site binding Protein	Sequence specific DNA-binding RNA polymerase II transcription activator and repressor; activates expression of genes involved in glycolysis; involved in chromatin silencing, establishment of protein localization to chromatin and telomere maintenance; localizes to the cytosol and nucleus
RAP1	77	motif_db/JASPAR/JASPAR2022_CORE_fungi_redundant_v2.meme	MA0359.2	DRTGTATGGGTGTWW	34	7.36	39	1.29	5.7	10	2.53e-12	-26.7	4.91e-10	-21.43	2.26e-12	-26.81	strong_peaks	loc250	9	13.42	YNL216W	RAP1	Repressor/Activator site binding Protein	Sequence specific DNA-binding RNA polymerase II transcription activator and repressor; activates expression of genes involved in glycolysis; involved in chromatin silencing, establishment of protein localization to chromatin and telomere maintenance; localizes to the cytosol and nucleus
RDR1	61	motif_db/JASPAR/JASPAR2022_CORE_fungi_redundant_v2.meme	MA0360.1	TGCGGAAM	138	29.87	397	13.16	2.28	0.83	8.14e-18	-39.35	1.58e-15	-34.08	9.19e-18	-39.23	strong_peaks	loc250	2.28	29.87	YOR380W	RDR1	Repressor of Drug Resistance	Sequence-specific DNA-binding transcription factor activity involved in xenobiotic response
RDS1	9	motif_db/JASPAR/JASPAR2022_CORE_fungi_redundant_v2.meme	MA0361.1	CGGCCGV	126	27.27	192	6.36	4.29	7	5.38e-36	-81.21	1.04e-33	-75.94	4.12e-35	-79.18	strong_peaks	loc250	4.29	27.27	YCR106W	RDS1	Regulator of Drug Sensitivity	Sequence-specific DNA-binding protein involved in xenobiotic response
RDS2	15	motif_db/JASPAR/JASPAR2022_CORE_fungi_redundant_v2.meme	MA0362.1	MTCGGGG	273	59.09	890	29.5	2	0.044	3.58e-34	-77.01	6.95e-32	-71.74	1.64e-33	-75.49	strong_peaks	loc250	2	59.09	YPL133C	RDS2	Regulator of Drug Sensitivity	DNA and zinc binding protein; binds RNA polymerase II cis-regulatory regions of DNA; positively regulates transcription; involved in cellular response to xenobiotic stimulus; localizes to the nucleus
REB1	54	motif_db/JASPAR/JASPAR2022_CORE_fungi_redundant_v2.meme	MA0363.2	WNYRTTACCCGGMHD	293	63.42	1231	40.8	1.56	0.19	7.06e-20	-44.1	1.37e-17	-38.83	9e-20	-43.85	strong_peaks	loc250	2.29	81.39	YBR049C	REB1	RNA polymerase I Enhancer Binding protein	Sequence-specific DNA binding protein in the nucleus involved in regulation of transcription by RNA polymerase II, and in the termination of transcription by RNA polymerase I
REB1	80	motif_db/JASPAR/JASPAR2022_CORE_fungi_redundant_v2.meme	MA0363.1	RTTACCCKG	83	17.97	238	7.89	2.29	2	1.35e-10	-22.73	2.62e-08	-17.46	1.16e-10	-22.88	strong_peaks	loc250	2.29	81.39	YBR049C	REB1	RNA polymerase I Enhancer Binding protein	Sequence-specific DNA binding protein in the nucleus involved in regulation of transcription by RNA polymerase II, and in the termination of transcription by RNA polymerase I
REI1	91	motif_db/JASPAR/JASPAR2022_CORE_fungi_redundant_v2.meme	MA0364.1	CCCCTGA	204	44.16	920	30.49	1.45	0.19	6.86e-09	-18.8	1.33e-06	-13.53	5.19e-09	-19.08	strong_peaks	loc250	1.45	44.16	YBR267W	REI1	REquired for Isotropic bud growth	DNA binding protein involved in ribosomal large subunit biogenesis, budding cell growth, nucelocytoplasmic transport and mitotic cell cycle; localized to the cytoplasm and large subunit precursor preribosome
RGM1	67	motif_db/JASPAR/JASPAR2022_CORE_fungi_redundant_v2.meme	MA0366.1	AGGGG	204	44.16	776	25.72	1.72	0.041	1.86e-15	-33.92	3.6e-13	-28.65	1.91e-15	-33.89	strong_peaks	loc250	1.72	44.16	YMR182C	RGM1		Putative sequence-specific DNA binding RNA polymerase II transcription factor; involved in positive regulation of transcription by RNA polymerase II; localized to nucleus and cytosol
RGT1	70	motif_db/JASPAR/JASPAR2022_CORE_fungi_redundant_v2.meme	MA0367.1	DDWTWWTCCGD	337	72.94	1646	54.56	1.34	2.5	2.32e-14	-31.39	4.5e-12	-26.13	2.28e-14	-31.41	strong_peaks	loc250	1.34	72.94	YKL038W	RGT1	Restores Glucose Transport	DNA-binding transcription factor, acts as both an activator and a repressor; involved in the regulation of glucose metabolism; localizes to the nucleus
RIM101	118	motif_db/JASPAR/JASPAR2022_CORE_fungi_redundant_v2.meme	MA0368.1	YGCCAAG	151	32.68	801	26.55	1.24	0.049	0.00387	-5.55	0.751	-0.29	0.00226	-6.09	strong_peaks	loc250	1.24	32.68	YHL027W	RIM101	Regulator of IME2	Sequence-specific DNA binding transcription factor that regulates transcription by RNA polymerase II involved in meiosis, spore formation, cell wall biosynthesis, and the cellular responses to anoxia and alkaline pH
RME1	112	motif_db/JASPAR/JASPAR2022_CORE_fungi_redundant_v2.meme	MA0370.1	TYYAAAGGAA	37	8.01	127	4.21	1.94	9.7	0.00058	-7.45	0.113	-2.18	0.000356	-7.94	strong_peaks	loc250	1.94	8.01	YGR044C	RME1	Regulator of MEiosis	Sequence-specific DNA-binding transcription factor; involved in negative regulation of transcription meiotic cell cycle genes; also involved in positive regulation of transcription of mitotic cell cycle genes during G1/S transition; localized to nucleus
RPH1	88	motif_db/JASPAR/JASPAR2022_CORE_fungi_redundant_v2.meme	MA0372.1	ACCCCTAA	55	11.9	133	4.41	2.72	8.1	2.36e-09	-19.87	4.57e-07	-14.6	1.84e-09	-20.11	strong_peaks	loc250	2.72	11.9	YER169W	RPH1	Regulator of PHR1	Histone demethylase specific for K36 tri- and dimethylated histone H3; independently functions as a transcription factor that represses the expression of genes involved in autophagy and DNA repair; involved in transcriptional elongation
RPN4	72	motif_db/JASPAR/JASPAR2022_CORE_fungi_redundant_v2.meme	MA0373.1	GGTGGCG	160	34.63	558	18.5	1.88	0.66	2.91e-14	-31.17	5.65e-12	-25.9	2.79e-14	-31.21	strong_peaks	loc250	1.88	34.63	YDL020C	RPN4	Regulatory Particle Non-ATPase	Sequence specific DNA-binding, RNA polymerase II transcription factor involved in positive regulation of proteasome-mediated ubiquitin-dependent protein catabolism and transcription from RNA pol II promoters in response to stress; implicated in the regulation of DNA repair; localizes to the nucleus
RSC3	7	motif_db/JASPAR/JASPAR2022_CORE_fungi_redundant_v2.meme	MA0374.1	CGCGCVN	144	31.17	244	8.09	3.86	7.3	9.45e-38	-85.25	1.83e-35	-79.98	9.29e-37	-82.97	strong_peaks	loc250	3.86	31.17	YDR303C	RSC3	Remodel the Structure of Chromatin	Subunit of RSC chromatin remodeling complex, slides along DNA affecting nucleosome positioning and transcription regulation; also involved in ploidy maintenance
RSC30	2	motif_db/JASPAR/JASPAR2022_CORE_fungi_redundant_v2.meme	MA0375.1	CSCGCGCG	180	38.96	334	11.07	3.52	1	1.35e-44	-101.02	2.61e-42	-95.75	4.64e-43	-97.48	strong_peaks	loc250	3.52	38.96	YHR056C	RSC30	Remodel the Structure of Chromatin	Subunit of RSC chromatin remodeling complex, slides along DNA affecting nucleosome positioning, transcription regulation, and DNA double-strand break repair via nonhomologous end joining
rst2	37	motif_db/JASPAR/JASPAR2022_CORE_fungi_redundant_v2.meme	MA1431.1	DDCCCCGCHY	331	71.65	1355	44.91	1.6	2.8	1.98e-27	-61.49	3.85e-25	-56.22	3.69e-27	-60.86	strong_peaks	loc250	1.6	71.65
RTG3	64	motif_db/JASPAR/JASPAR2022_CORE_fungi_redundant_v2.meme	MA0376.1	RDVKKAGCACGTGCYYDNWH	115	24.89	307	10.18	2.45	4.2	1.43e-16	-36.48	2.77e-14	-31.22	1.54e-16	-36.41	strong_peaks	loc250	2.45	24.89	YBL103C	RTG3	ReTroGrade regulation	Sequence-specific DNA-binding RNA polymerase II transcription factor involved in mitophagy and the induction of genes of the retrograde response pathway; localizes to both the nucleus and cytoplasm
SFP1	116	motif_db/JASPAR/JASPAR2022_CORE_fungi_redundant_v2.meme	MA0378.1	WNNNDRAAAAWTTTTYYNYDD	28	6.06	99	3.28	1.89	8.3	0.00381	-5.57	0.74	-0.3	0.00226	-6.09	strong_peaks	loc250	1.89	6.06	YLR403W	SFP1	Split Finger Protein	RNA polymerase II transcription factor involved in the activation of transcription of ribosomal protein genes and in the regulation of cell size; localizes to both the nucleus and cytoplasm
SIP4	22	motif_db/JASPAR/JASPAR2022_CORE_fungi_redundant_v2.meme	MA0380.1	YTCCGGA	185	40.04	457	15.15	2.65	7	3.39e-32	-72.46	6.57e-30	-67.19	1.06e-31	-71.32	strong_peaks	loc250	2.65	40.04	YJL089W	SIP4	SNF1-Interacting Protein	Sequence-specific DNA-binding transcription factor that positively regulates gluconeogenesis, and negatively regulates invasive growth in response to glucose limitation; localizes to nucleus
SKN7	44	motif_db/JASPAR/JASPAR2022_CORE_fungi_redundant_v2.meme	MA0381.1	GGCCRN	195	42.21	594	19.69	2.15	7.2	3.17e-24	-54.11	6.15e-22	-48.84	4.96e-24	-53.66	strong_peaks	loc250	2.15	42.21	YHR206W	SKN7	Suppressor of Kre Null	A sequence-specific DNA binding transcription factor that regulates transcription from RNA polymerase II promoter in response to oxidative stress; also involved in regulation of cell size, and responses to osmotic stress and singlet oxygen; localized to the nucleus
SNT2	107	motif_db/JASPAR/JASPAR2022_CORE_fungi_redundant_v2.meme	MA0384.1	TGRTAGCGCCR	6	1.3	2	0.07	15.2	16	0.000118	-9.05	0.0228	-3.78	7.56e-05	-9.49	strong_peaks	loc250	15.2	1.3	YGL131C	SNT2		Zinc-binding ubiquitin protein ligase of the SNT2C complex, which plays a role in transcriptional regulation; involved in histone ubiquitination and histone catabolism; localizes to the nucleus and cytoplasm
STB4	60	motif_db/JASPAR/JASPAR2022_CORE_fungi_redundant_v2.meme	MA0391.1	YTCGGAA	114	24.68	283	9.38	2.64	1.1	2.34e-18	-40.59	4.55e-16	-35.33	2.69e-18	-40.46	strong_peaks	loc250	2.64	24.68	YMR019W	STB4	Sin Three Binding protein	Sequence specific DNA binding protein; localizes to nucleus and mitochondria
STB5	28	motif_db/JASPAR/JASPAR2022_CORE_fungi_redundant_v2.meme	MA0392.1	CGGNGYTA	240	51.95	762	25.26	2.06	4.9	1.23e-29	-66.57	2.39e-27	-61.3	3.03e-29	-65.67	strong_peaks	loc250	2.06	51.95	YHR178W	STB5	Sin Three Binding protein	DNA-binding transcription factor involved in regulation of transcription by RNA polymerase II. And transcription elongation by RNA polymerase II promoter; localizes to nucleus
STP1	51	motif_db/JASPAR/JASPAR2022_CORE_fungi_redundant_v2.meme	MA0394.1	YGCGGCKB	221	47.84	775	25.69	1.86	0.88	3.34e-21	-47.15	6.49e-19	-41.88	4.51e-21	-46.85	strong_peaks	loc250	1.86	47.84	YDR463W	STP1	Species-specific tRNA Processing	Sequence-specific DNA binding RNA polymerase II transcription activator; localizes to nucleus, cytoplasm, and plasma membrane
STP2	8	motif_db/JASPAR/JASPAR2022_CORE_fungi_redundant_v2.meme	MA0395.1	YNANYGGCGCCGYRYVNMBH	292	63.2	964	31.95	1.98	0.78	3.27e-37	-84.01	6.34e-35	-78.74	2.81e-36	-81.86	strong_peaks	loc250	1.98	63.2	YHR006W	STP2	protein with similarity to Stp1p	Sequence-specific DNA binding RNA polymerase II transcription activator
STP3	89	motif_db/JASPAR/JASPAR2022_CORE_fungi_redundant_v2.meme	MA0396.1	RSTAGCGCA	141	30.52	551	18.26	1.68	0.38	2.93e-09	-19.65	5.68e-07	-14.38	2.26e-09	-19.91	strong_peaks	loc250	1.68	30.52	YLR375W	STP3	protein with similarity to Stp1p	Sequence specific DNA binding protein; localizes to nucleus
STP4	81	motif_db/JASPAR/JASPAR2022_CORE_fungi_redundant_v2.meme	MA0397.1	GVTAGCGCA	154	33.33	596	19.75	1.69	0.23	1.78e-10	-22.45	3.45e-08	-17.18	1.51e-10	-22.61	strong_peaks	loc250	1.69	33.33	YDL048C	STP4	protein with similarity to Stp1p	Zinc ion binding protein; localizes to cytoplasm, mitochondria and nucleus
SUT1	12	motif_db/JASPAR/JASPAR2022_CORE_fungi_redundant_v2.meme	MA0399.1	CGCGGGG	155	33.55	302	10.01	3.36	8.3	2.18e-35	-79.81	4.23e-33	-74.54	1.25e-34	-78.07	strong_peaks	loc250	3.36	33.55	YGL162W	SUT1	Sterol UpTake	Transcription regulator involved in response to pheromones; localizes to both nucleus and cytoplasm
SUT2	109	motif_db/JASPAR/JASPAR2022_CORE_fungi_redundant_v2.meme	MA0400.1	HNNHHRAACTCCGAAHHNBD	31	6.71	94	3.12	2.2	6.6	0.000288	-8.15	0.0558	-2.89	0.000182	-8.61	strong_peaks	loc250	2.2	6.71	YPR009W	SUT2	Sterol UpTake	Sequence-specific DNA binding protein involved in negative and positive regulation of transcription by RNA polymerase II; localizes to nucleus
SWI4	65	motif_db/JASPAR/JASPAR2022_CORE_fungi_redundant_v2.meme	MA0401.1	ACGCGAAA	153	33.12	495	16.41	2.02	1.1	5.54e-16	-35.13	1.07e-13	-29.86	5.87e-16	-35.07	strong_peaks	loc250	2.02	33.12	YER111C	SWI4	SWItching deficient	Sequence-specific DNA binding transcription factor that activates transcription by RNA polymerase II during heat stress and during the G1/S mitotic transition; component of the SBF complex
SWI5	104	motif_db/JASPAR/JASPAR2022_CORE_fungi_redundant_v2.meme	MA0402.1	TGCTGGTH	112	24.24	495	16.41	1.49	1.1	4.26e-05	-10.06	0.00826	-4.8	2.82e-05	-10.48	strong_peaks	loc250	1.49	24.24	YDR146C	SWI5	SWItching deficient	Sequence-specific DNA-binding RNA polymerase II transcription factor involved in regulation of the mitotic cell cycle and of mating-type switching; localizes to both the nucleus and the cytoplasm
TBF1	73	motif_db/JASPAR/JASPAR2022_CORE_fungi_redundant_v2.meme	MA0403.1	ARCCCTAV	114	24.68	331	10.97	2.26	7.9	2.98e-14	-31.14	5.78e-12	-25.88	2.81e-14	-31.2	strong_peaks	loc250	2.26	54.12	YPL128C	TBF1	TTAGGG repeat-Binding Factor	Chromatin insulator sequence binding protein involved in negative regulation of chromatin silencing, negative regulation of telomere maintenance via telomerase and telomere maintenance via telomere lengthening; localizes to nucleus
TBF1	97	motif_db/JASPAR/JASPAR2022_CORE_fungi_redundant_v2.meme	MA0403.2	WHHWAACCCTAANWWW	136	29.44	584	19.36	1.53	3.9	1.02e-06	-13.8	0.000198	-8.53	7.22e-07	-14.14	strong_peaks	loc250	2.26	54.12	YPL128C	TBF1	TTAGGG repeat-Binding Factor	Chromatin insulator sequence binding protein involved in negative regulation of chromatin silencing, negative regulation of telomere maintenance via telomerase and telomere maintenance via telomere lengthening; localizes to nucleus
TBS1	39	motif_db/JASPAR/JASPAR2022_CORE_fungi_redundant_v2.meme	MA0404.1	CGGATCCG	222	48.05	695	23.04	2.09	4.2	2.7e-27	-61.18	5.24e-25	-55.91	4.76e-27	-60.61	strong_peaks	loc250	2.09	48.05	YBR150C	TBS1	ThiaBendazole Sensitive	Zinc ion binding protein; localizes to cytoplasm, mitochondria and nucleus
TDA9	47	motif_db/JASPAR/JASPAR2022_CORE_fungi_redundant_v2.meme	MA0431.1	NCCCCDCWH	144	31.17	364	12.06	2.59	1.1	4.24e-23	-51.52	8.22e-21	-46.25	6.2e-23	-51.13	strong_peaks	loc250	2.59	31.17	YML081W	TDA9	Topoisomerase I Damage Affected	Nuclear sequence-specific DNA binding protein involved in acetate biosynthesis
TEA1	45	motif_db/JASPAR/JASPAR2022_CORE_fungi_redundant_v2.meme	MA0405.1	GCGSRCWT	140	30.3	339	11.24	2.7	7.5	7.72e-24	-53.22	1.5e-21	-47.95	1.18e-23	-52.79	strong_peaks	loc250	2.7	30.3	YOR337W	TEA1	Ty Enhancer Activator	Sequence-specific DNA-binding protein involved in transcription; localizes to cell cortex of cell tip
UGA3	3	motif_db/JASPAR/JASPAR2022_CORE_fungi_redundant_v2.meme	MA0410.1	SGGCGGGA	184	39.83	363	12.03	3.31	3.7	8.61e-43	-96.86	1.67e-40	-91.59	1.56e-41	-93.96	strong_peaks	loc250	3.31	39.83	YDL170W	UGA3	Utilization of GAba	Promoter proximal region, sequence-specific DNA binding protein that recruits additional transcription factors to activate genes involved in the utilization of gamma-aminobutyrate (GABA)
UME6	115	motif_db/JASPAR/JASPAR2022_CORE_fungi_redundant_v2.meme	MA0412.1	TSGGCGGCTAWWT	16	3.46	39	1.29	2.77	5.8	0.00148	-6.51	0.287	-1.25	0.000887	-7.03	strong_peaks	loc250	2.77	38.96	YDR207C	UME6	Unscheduled Meiotic gene Expression	Sequence-specific DNA-binding transcription factor involved in chromatin remodeling as it relates to the regulation of pseudohyphal growth, mitosis, meiosis, sporulation, lipid metabolism and nitrogen catabolite repression; component of the Rpd3L histone deacetylase complex
UME6	46	motif_db/JASPAR/JASPAR2022_CORE_fungi_redundant_v2.meme	MA0412.2	WWTTAGCCGCCSANV	164	35.5	450	14.92	2.38	0.21	1.38e-23	-52.63	2.68e-21	-47.37	2.07e-23	-52.23	strong_peaks	loc250	2.77	38.96	YDR207C	UME6	Unscheduled Meiotic gene Expression	Sequence-specific DNA-binding transcription factor involved in chromatin remodeling as it relates to the regulation of pseudohyphal growth, mitosis, meiosis, sporulation, lipid metabolism and nitrogen catabolite repression; component of the Rpd3L histone deacetylase complex
URC2	25	motif_db/JASPAR/JASPAR2022_CORE_fungi_redundant_v2.meme	MA0422.1	HCGGARWTAW	219	47.4	633	20.98	2.26	0.06	4.05e-31	-69.98	7.86e-29	-64.71	1.12e-30	-68.97	strong_peaks	loc250	2.26	47.4	YDR520C	URC2	URacil Catabolism	Sequence-specific DNA binding protein presumably involved in uracil catabolism; localizes to both nucleus and cytoplasm
USV1	83	motif_db/JASPAR/JASPAR2022_CORE_fungi_redundant_v2.meme	MA0413.1	NNDTTMCCCCTGAAYHWNKV	111	24.03	376	12.46	1.94	0.58	2.98e-10	-21.93	5.79e-08	-16.66	2.47e-10	-22.12	strong_peaks	loc250	1.94	24.03	YPL230W	USV1	Up in StarVation	Sequence-specific DNA-binding protein involved in regulation of transcription by salt stress and carbon catabolites
YAP6	111	motif_db/JASPAR/JASPAR2022_CORE_fungi_redundant_v2.meme	MA0418.1	SGKYHGMTTAYGTAAKCRRS	413	89.39	2521	83.56	1.07	0.36	0.000545	-7.52	0.106	-2.25	0.000338	-7.99	strong_peaks	loc250	1.07	89.39	YDR259C	YAP6	Yeast homolog of AP-1	Sequence-specific DNA-binding transcription factor that recruits the Cyc1/Tup1 transcriptional repressor complex to RNA polymerase II promoters to downregulate transcription
YER130C	103	motif_db/JASPAR/JASPAR2022_CORE_fungi_redundant_v2.meme	MA0423.1	VCCCCTWTH	24	5.19	52	1.72	3.07	11	2.36e-05	-10.66	0.00457	-5.39	1.57e-05	-11.06	strong_peaks	loc250	3.07	5.19
YER184C	4	motif_db/JASPAR/JASPAR2022_CORE_fungi_redundant_v2.meme	MA0424.1	HTCCGGAR	177	38.31	335	11.1	3.45	7.4	9.09e-43	-96.8	1.76e-40	-91.54	1.56e-41	-93.96	strong_peaks	loc250	3.45	38.31
YGR067C	20	motif_db/JASPAR/JASPAR2022_CORE_fungi_redundant_v2.meme	MA0425.1	VCCCCDCNNNNNNN	273	59.09	911	30.2	1.96	0.18	1.56e-32	-73.24	3.03e-30	-67.97	5.38e-32	-72	strong_peaks	loc250	1.96	59.09
YKL222C	10	motif_db/JASPAR/JASPAR2022_CORE_fungi_redundant_v2.meme	MA0428.1	AACGGARAT	144	31.17	258	8.55	3.65	8.1	1.18e-35	-80.42	2.3e-33	-75.15	7.95e-35	-78.52	strong_peaks	loc250	3.65	31.17
YLL054C	1	motif_db/JASPAR/JASPAR2022_CORE_fungi_redundant_v2.meme	MA0429.1	CGGCCGA	298	64.5	843	27.94	2.31	5	2.89e-51	-116.37	5.61e-49	-111.1	1.99e-49	-112.14	strong_peaks	loc250	2.31	64.5
YLR278C	38	motif_db/JASPAR/JASPAR2022_CORE_fungi_redundant_v2.meme	MA0430.1	YCGGAGTT	144	31.17	323	10.71	2.92	6.2	2.36e-27	-61.31	4.58e-25	-56.04	4.28e-27	-60.72	strong_peaks	loc250	2.92	31.17
YNR063W	50	motif_db/JASPAR/JASPAR2022_CORE_fungi_redundant_v2.meme	MA0432.1	TCGGAGAW	105	22.73	218	7.23	3.16	6.6	2.28e-21	-47.53	4.42e-19	-42.26	3.14e-21	-47.21	strong_peaks	loc250	3.16	22.73
YPR022C	63	motif_db/JASPAR/JASPAR2022_CORE_fungi_redundant_v2.meme	MA0436.1	CCCCACN	111	24.03	285	9.45	2.55	1.7	5.77e-17	-37.39	1.12e-14	-32.12	6.3e-17	-37.3	strong_peaks	loc250	2.55	24.03
YPR196W	71	motif_db/JASPAR/JASPAR2022_CORE_fungi_redundant_v2.meme	MA0437.1	ATTTYYCCG	57	12.34	98	3.25	3.82	9.9	2.67e-14	-31.26	5.17e-12	-25.99	2.58e-14	-31.29	strong_peaks	loc250	3.82	12.34
YRM1	48	motif_db/JASPAR/JASPAR2022_CORE_fungi_redundant_v2.meme	MA0438.1	ACGGAAAT	307	66.45	1275	42.26	1.57	2.9	1.6e-22	-50.19	3.1e-20	-44.92	2.29e-22	-49.83	strong_peaks	loc250	1.57	66.45	YOR172W	YRM1	Yeast Reveromycin resistance Modulator	Sequence-specific DNA binding transcription factor that regulates transcription by RNA polymerase II
YRR1	31	motif_db/JASPAR/JASPAR2022_CORE_fungi_redundant_v2.meme	MA0439.1	VTTATHTCCGY	215	46.54	639	21.18	2.2	5.9	7.38e-29	-64.78	1.43e-26	-59.51	1.64e-28	-63.98	strong_peaks	loc250	2.2	46.54	YOR162C	YRR1	Yeast Reveromycin-A Resistant	Sequence specific DNA-binding RNA polymerase II transcription factor, activates genes involved in oxidative stress response; localizes to the nucleus
ZMS1	26	motif_db/JASPAR/JASPAR2022_CORE_fungi_redundant_v2.meme	MA0441.1	TWCCCCGCW	237	51.3	731	24.23	2.12	0.25	8.18e-31	-69.28	1.59e-28	-64.01	2.17e-30	-68.3	strong_peaks	loc250	2.12	51.3
