# Supplementary material for: Intergenic accumulation of RNA polymerase II maintains the potential for swift transcriptional restart upon release from quiescence
Source: HighWire-hosted journal article supplement (doi:10.1101/gr.279874.124), 2025-08-12
Supplement: Supplemental_Table_S6.xlsx [file Supplemental_Table_S6.xlsx]

## Sheet: Sheet1
R packages used for analyses
package	* version	date (UTC)	lib	source
abind	1.4-5	2016-07-21	[1]	CRAN (R 4.3.0)
backports	1.4.1	2021-12-13	[2]	CRAN (R 4.3.0)
bedtoolsr	* 2.30.0-5	2024-03-20	[1]	Github (PhanstielLab/bedtoolsr@cce152f)
beeswarm	0.4.0	2021-06-01	[2]	CRAN (R 4.3.0)
Biobase	2.62.0	2023-10-26	[1]	Bioconductor
BiocGenerics	0.48.1	2023-11-02	[1]	Bioconductor
BiocIO	1.12.0	2023-10-26	[1]	Bioconductor
BiocManager	* 1.30.22	2023-08-08	[1]	CRAN (R 4.3.0)
BiocParallel	1.36.0	2023-10-26	[1]	Bioconductor
Biostrings	2.70.3	2024-03-16	[1]	Bioconductor 3.18 (R 4.3.3)
bitops	1.0-7	2021-04-24	[1]	CRAN (R 4.3.0)
broom	1.0.5	2023-06-09	[2]	CRAN (R 4.3.0)
cachem	1.0.8	2023-05-01	[2]	CRAN (R 4.3.0)
car	3.1-2	2023-03-30	[1]	CRAN (R 4.3.0)
carData	3.0-5	2022-01-06	[1]	CRAN (R 4.3.0)
cellranger	1.1.0	2016-07-27	[2]	CRAN (R 4.3.0)
cli	3.6.2	2023-12-11	[2]	CRAN (R 4.3.1)
codetools	0.2-19	2023-02-01	[2]	CRAN (R 4.3.3)
colorspace	2.1-0	2023-01-23	[2]	CRAN (R 4.3.0)
ComplexUpset	1.3.3	2021-12-11	[1]	CRAN (R 4.3.3)
conflicted	1.2.0	2023-02-01	[2]	CRAN (R 4.3.0)
cowplot	1.1.3	2024-01-22	[1]	CRAN (R 4.3.1)
crayon	1.5.2	2022-09-29	[2]	CRAN (R 4.3.0)
DelayedArray	0.28.0	2023-11-06	[1]	Bioconductor
devtools	2.4.5	2022-10-11	[1]	CRAN (R 4.3.0)
digest	0.6.35	2024-03-11	[2]	CRAN (R 4.3.1)
dplyr	* 1.1.4	2023-11-17	[2]	CRAN (R 4.3.1)
ellipsis	0.3.2	2021-04-29	[2]	CRAN (R 4.3.0)
eulerr	* 7.0.1	2024-02-16	[1]	CRAN (R 4.3.1)
evaluate	0.23	2023-11-01	[2]	CRAN (R 4.3.1)
fansi	1.0.6	2023-12-08	[2]	CRAN (R 4.3.1)
farver	2.1.1	2022-07-06	[2]	CRAN (R 4.3.0)
fastmap	1.1.1	2023-02-24	[2]	CRAN (R 4.3.0)
forcats	* 1.0.0	2023-01-29	[2]	CRAN (R 4.3.0)
fs	1.6.3	2023-07-20	[2]	CRAN (R 4.3.0)
generics	0.1.3	2022-07-05	[2]	CRAN (R 4.3.0)
GenomeInfoDb	1.38.8	2024-03-16	[1]	Bioconductor 3.18 (R 4.3.3)
GenomeInfoDbDat	a 1.2.11	2024-03-20	[1]	Bioconductor
GenomicAlignmen	ts 1.38.2	2024-01-20	[1]	Bioconductor 3.18 (R 4.3.2)
GenomicRanges	1.54.1	2023-10-30	[1]	Bioconductor
ggbeeswarm	* 0.7.2	2023-04-29	[2]	CRAN (R 4.3.0)
ggExtra	* 0.10.1	2023-08-21	[1]	CRAN (R 4.3.0)
ggplot2	* 3.4.4	2023-10-12	[1]	CRAN (R 4.3.3)
ggpubr	* 0.6.0	2023-02-10	[1]	CRAN (R 4.3.0)
ggrepel	* 0.9.5	2024-01-10	[1]	CRAN (R 4.3.1)
ggsignif	* 0.6.4	2022-10-13	[1]	CRAN (R 4.3.0)
ggvenn	* 0.1.10	2023-03-31	[1]	CRAN (R 4.3.0)
glue	1.7.0	2024-01-09	[2]	CRAN (R 4.3.1)
gridExtra	2.3	2017-09-09	[2]	CRAN (R 4.3.0)
gtable	0.3.4	2023-08-21	[2]	CRAN (R 4.3.0)
hms	1.1.3	2023-03-21	[2]	CRAN (R 4.3.0)
htmltools	0.5.7	2023-11-03	[2]	CRAN (R 4.3.1)
htmlwidgets	1.6.4	2023-12-06	[1]	CRAN (R 4.3.1)
httpuv	1.6.14	2024-01-26	[1]	CRAN (R 4.3.1)
IRanges	2.36.0	2023-10-26	[1]	Bioconductor
knitr	* 1.45	2023-10-30	[2]	CRAN (R 4.3.1)
labeling	0.4.3	2023-08-29	[2]	CRAN (R 4.3.0)
later	1.3.2	2023-12-06	[1]	CRAN (R 4.3.1)
lattice	0.22-5	2023-10-24	[2]	CRAN (R 4.3.1)
lifecycle	1.0.4	2023-11-07	[2]	CRAN (R 4.3.1)
lubridate	* 1.9.3	2023-09-27	[2]	CRAN (R 4.3.1)
magrittr	* 2.0.3	2022-03-30	[2]	CRAN (R 4.3.0)
Matrix	1.6-5	2024-01-11	[2]	CRAN (R 4.3.3)
MatrixGenerics	1.14.0	2023-10-26	[1]	Bioconductor
matrixStats	1.2.0	2023-12-11	[1]	CRAN (R 4.3.1)
memoise	2.0.1	2021-11-26	[2]	CRAN (R 4.3.0)
MetBrewer	* 0.2.0	2022-03-21	[1]	CRAN (R 4.3.0)
mime	0.12	2021-09-28	[2]	CRAN (R 4.3.0)
miniUI	0.1.1.1	2018-05-18	[1]	CRAN (R 4.3.0)
munsell	0.5.0	2018-06-12	[2]	CRAN (R 4.3.0)
patchwork	1.2.0	2024-01-08	[1]	CRAN (R 4.3.1)
pillar	1.9.0	2023-03-22	[2]	CRAN (R 4.3.0)
pkgbuild	1.4.4	2024-03-17	[1]	CRAN (R 4.3.1)
pkgconfig	2.0.3	2019-09-22	[2]	CRAN (R 4.3.0)
pkgload	1.3.4	2024-01-16	[1]	CRAN (R 4.3.1)
plyr	1.8.9	2023-10-02	[2]	CRAN (R 4.3.1)
profvis	0.3.8	2023-05-02	[1]	CRAN (R 4.3.0)
promises	1.2.1	2023-08-10	[1]	CRAN (R 4.3.0)
purrr	* 1.0.2	2023-08-10	[2]	CRAN (R 4.3.0)
R6	2.5.1	2021-08-19	[2]	CRAN (R 4.3.0)
Rcpp	1.0.12	2024-01-09	[2]	CRAN (R 4.3.1)
RCurl	1.98-1.14	2024-01-09	[1]	CRAN (R 4.3.1)
readr	* 2.1.5	2024-01-10	[2]	CRAN (R 4.3.1)
readxl	1.4.3	2023-07-06	[2]	CRAN (R 4.3.0)
remotes	2.5.0	2024-03-17	[1]	CRAN (R 4.3.1)
restfulr	0.0.15	2022-06-16	[1]	CRAN (R 4.3.0)
rjson	0.2.21	2022-01-09	[1]	CRAN (R 4.3.0)
rlang	1.1.3	2024-01-10	[2]	CRAN (R 4.3.1)
rmarkdown	2.26	2024-03-05	[2]	CRAN (R 4.3.1)
Rsamtools	2.18.0	2023-10-26	[1]	Bioconductor
rstatix	0.7.2	2023-02-01	[1]	CRAN (R 4.3.0)
rstudioapi	0.15.0	2023-07-07	[2]	CRAN (R 4.3.0)
rtracklayer	1.62.0	2023-10-26	[1]	Bioconductor
S4Arrays	1.2.1	2024-03-05	[1]	Bioconductor 3.18 (R 4.3.2)
S4Vectors	0.40.2	2023-11-25	[1]	Bioconductor 3.18 (R 4.3.2)
scales	1.3.0	2023-11-28	[2]	CRAN (R 4.3.1)
sessioninfo	1.2.2	2021-12-06	[1]	CRAN (R 4.3.0)
shiny	1.8.0	2023-11-17	[1]	CRAN (R 4.3.1)
SparseArray	1.2.4	2024-02-10	[1]	Bioconductor 3.18 (R 4.3.2)
stringi	1.8.3	2023-12-11	[2]	CRAN (R 4.3.1)
stringr	* 1.5.1	2023-11-14	[2]	CRAN (R 4.3.1)
SummarizedExper	iment 1.32.0	2023-11-06	[1]	Bioconductor
tibble	* 3.2.1	2023-03-20	[2]	CRAN (R 4.3.0)
tidyr	* 1.3.1	2024-01-24	[2]	CRAN (R 4.3.1)
tidyselect	1.2.1	2024-03-11	[2]	CRAN (R 4.3.1)
tidyverse	* 2.0.0	2023-02-22	[2]	CRAN (R 4.3.0)
timechange	0.3.0	2024-01-18	[2]	CRAN (R 4.3.1)
tzdb	0.4.0	2023-05-12	[2]	CRAN (R 4.3.0)
UpSetR	* 1.4.0	2019-05-22	[2]	CRAN (R 4.3.0)
urlchecker	1.0.1	2021-11-30	[1]	CRAN (R 4.3.0)
usethis	2.2.3	2024-02-19	[1]	CRAN (R 4.3.1)
utf8	1.2.4	2023-10-22	[2]	CRAN (R 4.3.1)
vctrs	0.6.5	2023-12-01	[2]	CRAN (R 4.3.1)
vipor	0.4.7	2023-12-18	[2]	CRAN (R 4.3.1)
wesanderson	* 0.3.7	2023-10-31	[1]	CRAN (R 4.3.1)
withr	3.0.0	2024-01-16	[2]	CRAN (R 4.3.1)
xfun	0.42	2024-02-08	[2]	CRAN (R 4.3.1)
XML	3.99-0.16	.1 2024-01-22	[1]	CRAN (R 4.3.1)
xtable	1.8-4	2019-04-21	[1]	CRAN (R 4.3.0)
XVector	0.42.0	2023-10-26	[1]	Bioconductor
yaml	2.3.8	2023-12-11	[2]	CRAN (R 4.3.1)
zlibbioc	1.48.2	2024-03-13	[1]	Bioconductor 3.18 (R 4.3.3)
